# Supplementary material for: Dynamic A-to-I RNA editing during acute neuroinflammation in sepsis-associated encephalopathy
Source: Frontiers journal article supplement (doi:10.3389/fnins.2024.1435185), 2024-08-02

**A**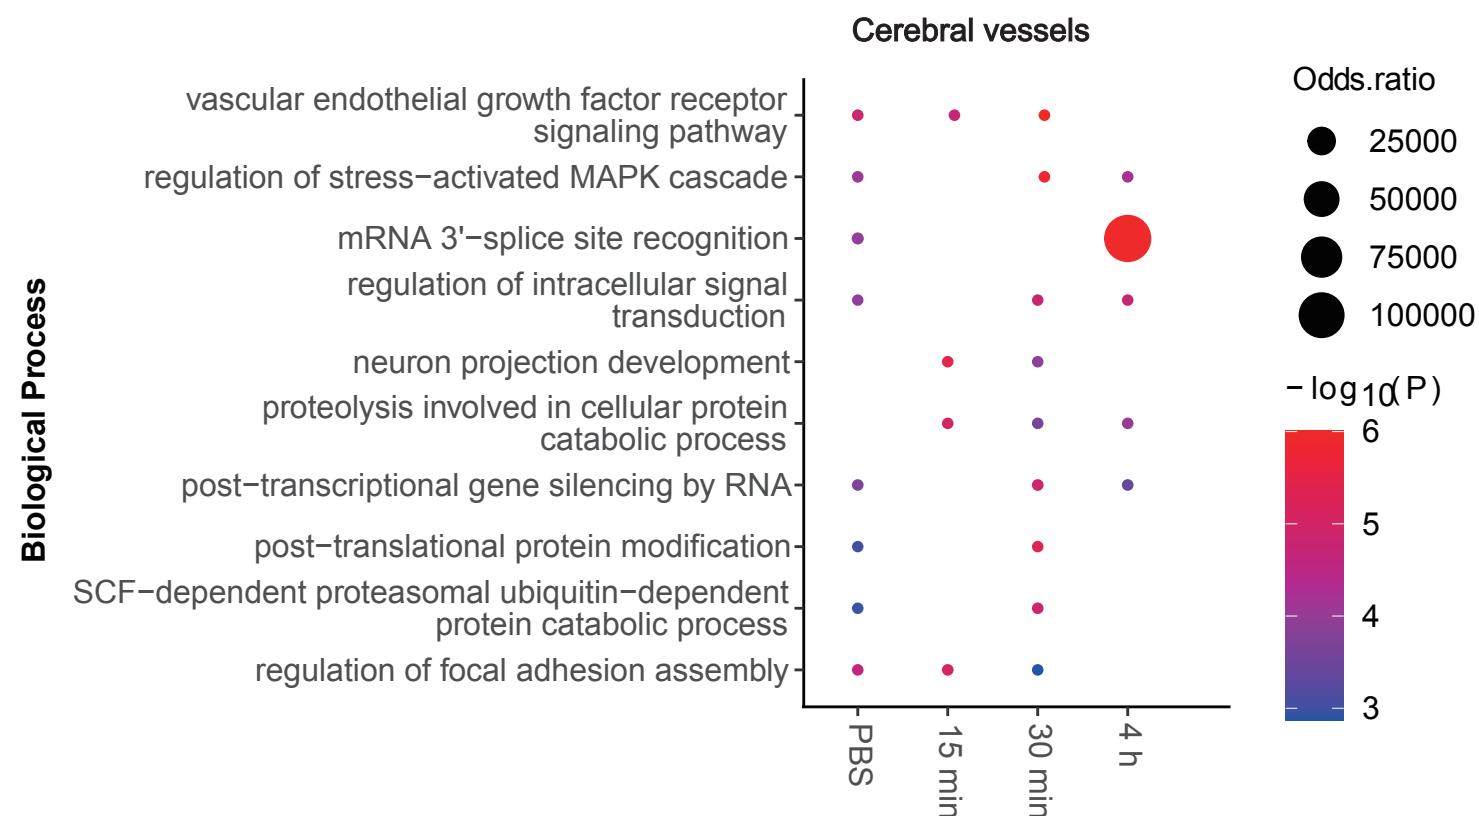**B**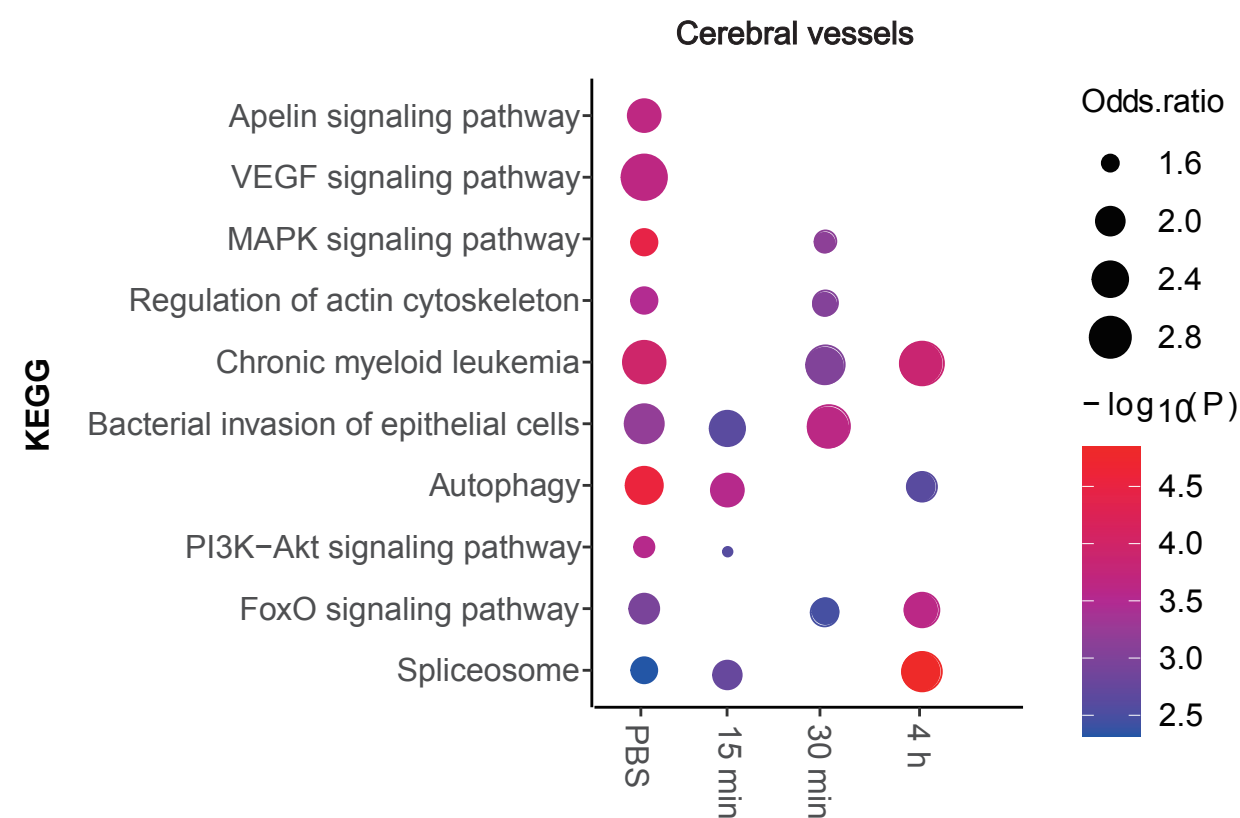**C**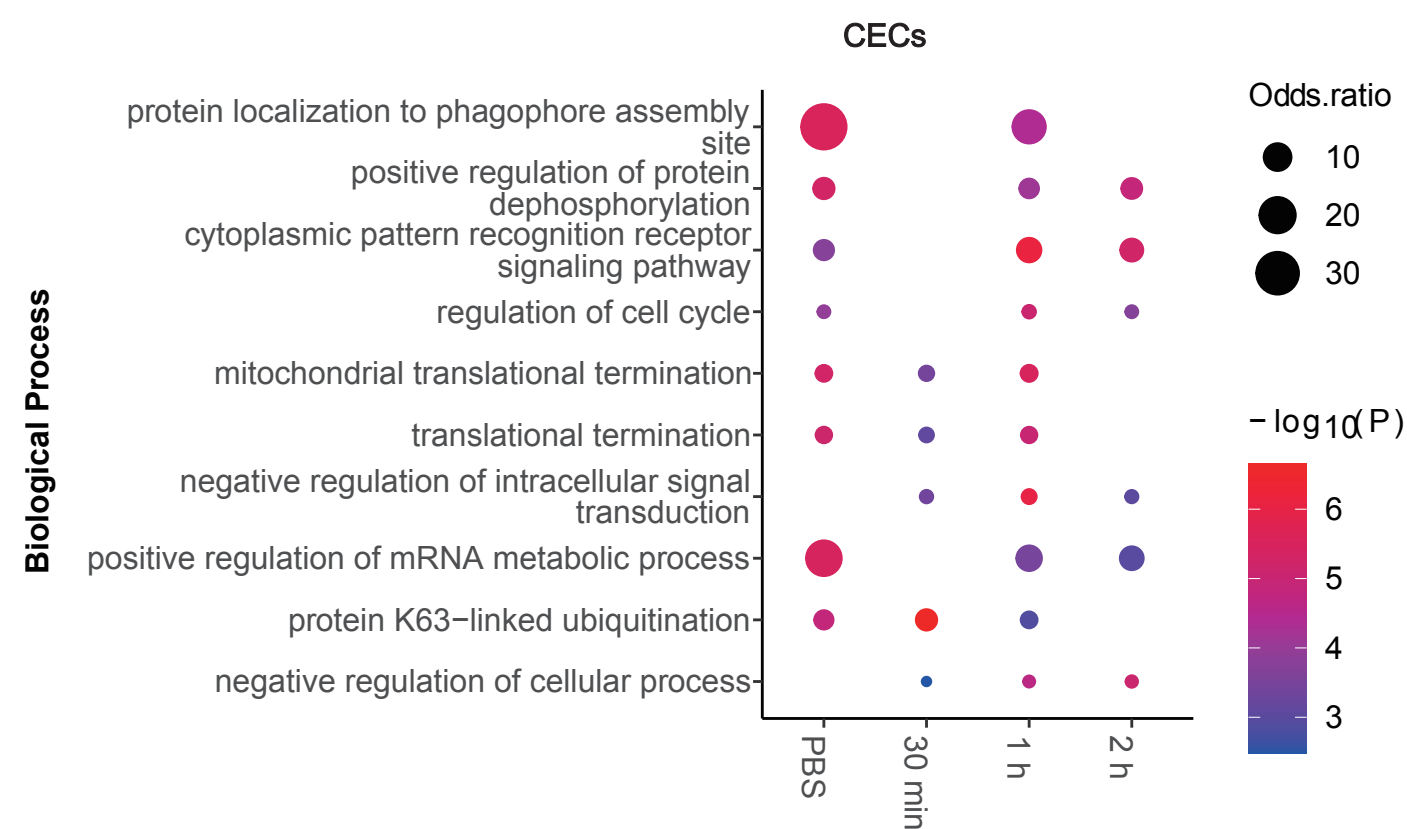**D**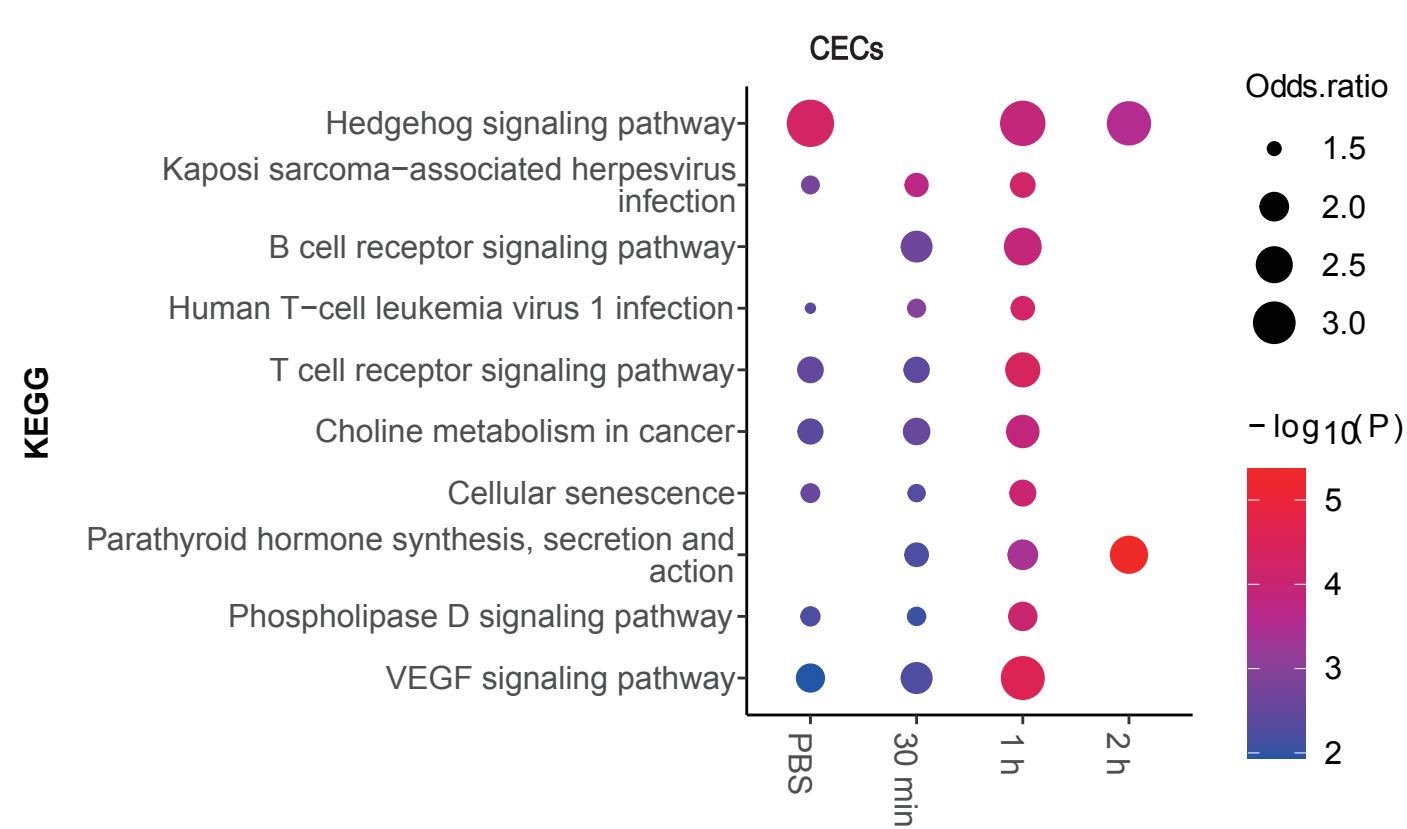**E**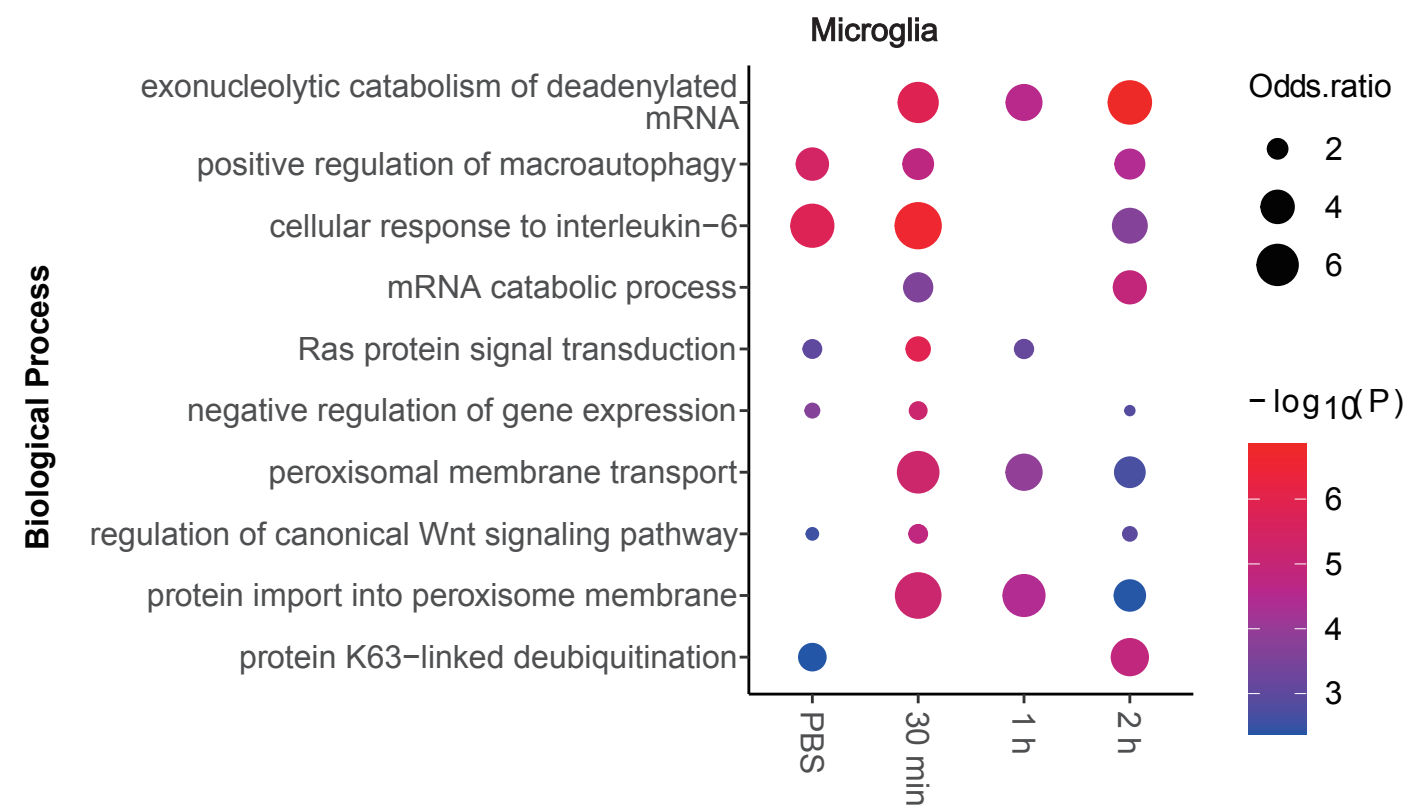**F**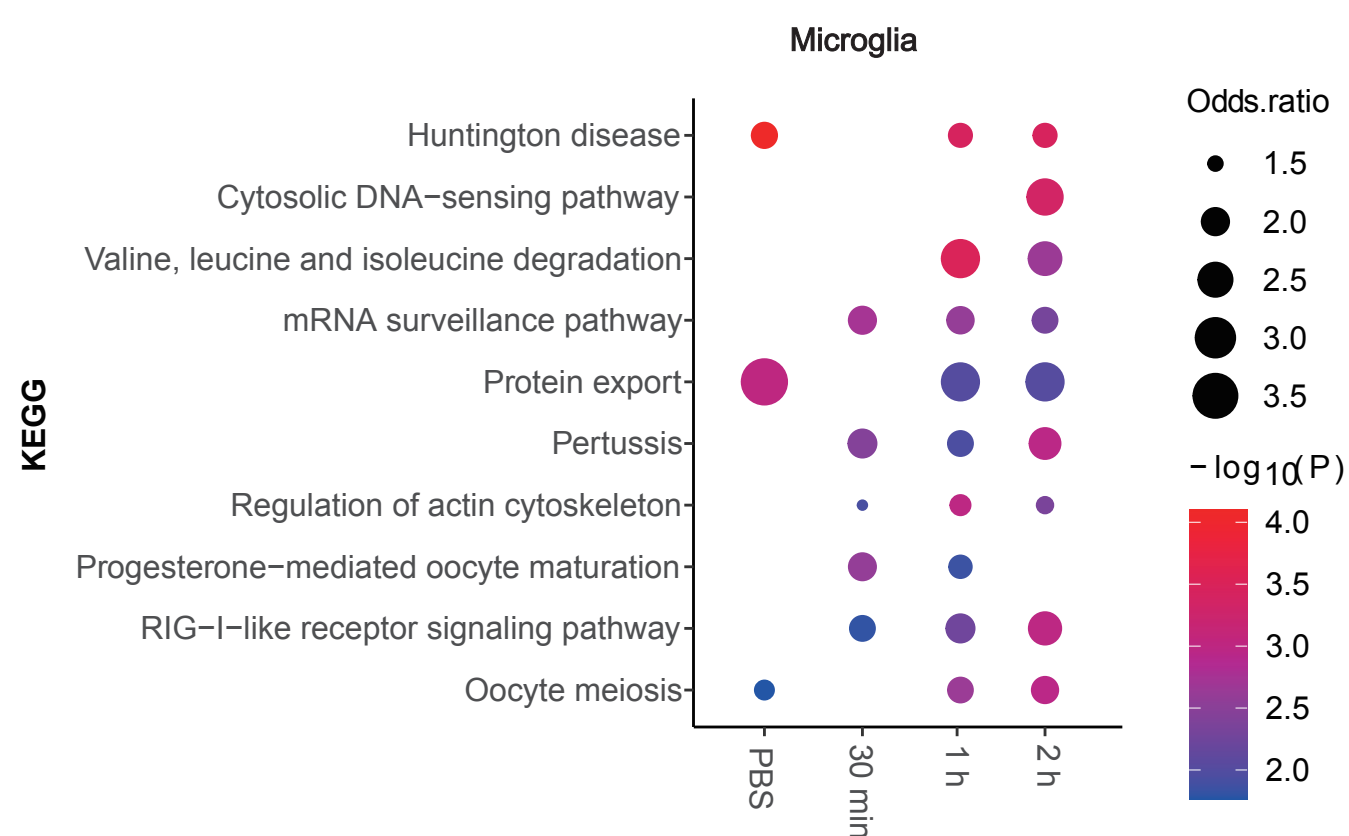

Supplement: Data_Sheet_4.PDF [file Data_Sheet_4.PDF]
