# Supplementary material for: Dynamic A-to-I RNA editing during acute neuroinflammation in sepsis-associated encephalopathy
Source: Front Neurosci. 2024 Aug 2;18:1435185. doi: 10.3389/fnins.2024.1435185 (PMC11328407; doi:10.3389/fnins.2024.1435185)
Supplement: Supplementary file 7 [file Table_1.XLSX]

## Sheet: DE_optimized_genes
Table S1. Differential edited genes in cerebral vessels during acute neuroinflammation in SAE.
Gene
Pakap
Phc2
Islr
Aco1
Spock2
Iqgap1
Rpsa
Bms1
Azin1
Scg3
Slfn5
Cp
Ovca2
Azi2
Gm43951
Trnt1
Slc6a6
Gm40841
Sod2
Rab6a
Bbs2
Rhoa
Crat
Ttc5
Serping1
Kif9
Palm
Ywhab
Dtx3l
Ywhag
Tra2a
Fgf14
Gls
Dcun1d3
Myl12b
Ppp3r1
Trim12a
Cisd2
Icam1
Pmpca
Ska2
Tmem38a
2900026A02Rik
Selenop
Igfbp7
Rpa1
Crocc
Tmco6
Tspan14
Gnb4
Ccn3
Map4k2
Zbtb4
Nol10
Gypc
Cox7b
Eed
Noct
Tm6sf1
Nr3c1
Septin2
Pcdhgc5
Cds2
Gm15753
Arpc5l
Capza2
Zfp655
Eif2s3y
Rprd1a
Lrrc32
Stk38
Ralyl
Mier3
Sdc4
Norad
Pvr
Serpine1
Lrrc58
Tmem63b
Rdh5
Mlh3
Rsrc2
St3gal1
Slc39a10
Rhpn2
4933434E20Rik
Arhgef12
Grik5
Map6
Dagla
Flt1
Kdm3b
Luc7l2
Mrpl24
Apold1
Icosl
Zmpste24
Synpo
Gm37494
Tbc1d24
Rel
Akap8
Dlgap1
Dynll1
Efhd2
Meaf6
Derl2
Zfp771
Ccdc47
Irak2
Pcdh19
Man2a2
Chsy1
Fnbp1
Prxl2c
Bcan
Pum2
Ube2o
Gm42878
Nsmce4a
Gm26992
Lamp2
Cpt1c
Mapk1ip1l
Bok
Exosc10
Snrnp48
Dync2li1
Samm50
Ankrd28
Fndc3a
Naa35
Hykk
Coro2b
Ncl
Rab1b
Actl6b
Eln
Ggps1
Thrap3
Gm49394
Itm2a
Nfia
Zyg11b
Rpl7l1
Sat2
AL928616.1
Mfap1a
Zfand3
Yars
Dlg2
Dcaf10
Gm10557
Tgfbr3
Bmpr2
Ube3a
Luzp1
Bpgm
N4bp2l2
Zmynd8
Ptgr2
Nr4a1
Meg3
Flnb
Inpp5k
Exd2
Srpk1
Tpm4
Itih5
Sfxn2
Zbtb7b
Acsl4
Oasl2
Pih1d1
Mdc1
Acvrl1
Gnl3l
Ro60
Slc35e2
Hectd4
Dnajc18
Rab18
B4galt2
Rgs3
Ythdf3
Rab6b
Socs7
Gch1
Son
Gabrb1
Vcp
Parp12
Txndc16
Ccnyl1
Afdn
Ube2l6
Phf11d
Sez6l
Golga5
Cacng8
Ccz1
Gm29650
Sgk1
Lin37
Kif5b
Hacd3
Tubb6
Sp3
Tpp1
Pnpla6
Heatr3
Arpp19
Pcp4l1
Rrn3
Gm1043
Tsc22d1
Ebna1bp2
Zkscan3
Tef
Adsl
H2-T24
Vamp3
Deptor
Kif3c
Ptprb
Errfi1
Npdc1
Kpna4
Slc36a4
Plekhd1
Nudt21
Ankrd13d
Fbxo44
Dact3
Rfc2
Vcam1
Zc3h7a
Cars
Hipk2
Zscan26
Pde5a
Nrep
Ccdc84
Vwa3a
Klf6
Rab27a
Csad
Tmem175
Hjurp
Tatdn3
Qpctl
Snrnp70
Nt5dc3
Fam32a
Trp53inp1
Dda1
Gm49325
Mapk1
Plcd3
Il1rapl1
Nek4
Gas8
Naxd
Spag9
Fastk
Scamp2
Polr3f
Plin3
Eif2d
Cfap300
Zfp799
Ykt6
Rasal2
Map1lc3b
Iqcb1
Gm9817
Clu
Pkm
Tasor
Tpgs1
Il15
Ube2q2
Rab2a
Gfod1
Herc4
Dusp11
Pank3
Fadd
Sppl2a
Malt1
Tor1aip1
Mrtfa
Cdkn1b
Atl3
Klc1
