# Supplementary material for: Dynamic A-to-I RNA editing during acute neuroinflammation in sepsis-associated encephalopathy
Source: Front Neurosci. 2024 Aug 2;18:1435185. doi: 10.3389/fnins.2024.1435185 (PMC11328407; doi:10.3389/fnins.2024.1435185)
Supplement: Supplementary file 8 [file Table_2.XLSX]

## Sheet: DE_optimized_sites
Table S2. Differential A-to-I RNA editing events in cerebral vessels during acute neuroinflammation in SAE.
event_id	p.GLM	p.GLM.adj	p.fisher	p.fisher.permutation	known_site	Consequence	AAchange	NTchange	BIOTYPE	SYMBOL	description	Existing_variation	SIFT	ensembl_gene_id	p.Gene.GLM	p.Gene.GLM.adj	r.spearman	p.spearman	Repeat	PBS	LPS_15_minutes	LPS_30_minutes	LPS_4_hours
Pakap:chr4:57895139	2.305e-07	6.13514e-05	4.14534e-24	NA	FALSE	3_prime_UTR_variant	-	c.*2172A>G	protein_coding	Pakap	A kinase (PRKA) anchor protein 2	-	-	ENSMUSG00000038729	2.72641e-07	5.8046e-07	0.238179	0.455989	-	12.4667	12.9767	12.4733	25.2567
Phc2:chr4:128752175	4.91805e-06	0.000620062	1.44683e-19	NA	TRUE	3_prime_UTR_variant	-	c.*521A>G	protein_coding	Phc2	polyhomeotic 2	-	-	ENSMUSG00000028796	8.38838e-06	1.28752e-05	NA	NA	-	30.47	20.92	23.98	40.59
Islr:chr9:58158172	5.80865e-15	2.78292e-11	0.119258	NA	FALSE	synonymous_variant	p.R17=	c.51A>G	protein_coding	Islr	immunoglobulin superfamily containing leucine-rich repeat	-	-	ENSMUSG00000037206	5.37026e-07	1.0711e-06	-0.110147	0.733271	-	0	0	0	1.28333
Aco1:chr4:40190841	1.28067e-14	3.06785e-11	0.0494467	NA	FALSE	missense_variant	p.N735S	c.2204A>G	protein_coding	Aco1	aconitase 1	-	tolerated	ENSMUSG00000028405	3.82841e-08	1.0773e-07	-0.0458947	0.887373	-	0	0	2.27667	0
Spock2:chr10:60133279	8.75169e-10	8.38587e-07	2.85696e-13	NA	TRUE	3_prime_UTR_variant	-	c.*1798A>G	protein_coding	Spock2	sparc/osteonectin, cwcv and kazal-like domains proteoglycan 2	-	-	ENSMUSG00000058297	1.75983e-10	1.34912e-09	-0.573427	0.0554813	-	12.3633	9.44333	12.3667	20.9267
Iqgap1:chr7:80712052	2.61645e-06	0.000417847	2.77743e-11	NA	TRUE	3_prime_UTR_variant	-	c.*1780A>G	protein_coding	Iqgap1	IQ motif containing GTPase activating protein 1	-	-	ENSMUSG00000030536	6.05846e-07	1.18556e-06	NA	NA	B1_Mur2	4.22667	2.52	2.71667	7.96
Rpsa:chr9:120131419	4.34587e-06	0.000594887	3.32107e-11	NA	FALSE	synonymous_variant	p.P271=	c.813A>G	protein_coding	Rpsa	ribosomal protein SA	-	-	ENSMUSG00000032518	0.000115607	0.000146221	NA	NA	-	5.03333	4.59667	4.83333	2.12667
Bms1:chr6:118396243	9.71512e-11	1.5515e-07	0.203678	NA	FALSE	missense_variant	p.R826G	c.2476A>G	protein_coding	Bms1	BMS1, ribosome biogenesis factor	-	deleterious	ENSMUSG00000030138	6.78501e-07	1.31358e-06	0.458947	0.133409	-	1.82	0	0	0
Azin1:chr15:38491612	2.49706e-06	0.000412532	1.08336e-10	NA	TRUE	missense_variant	p.S367G	c.1099A>G	protein_coding	Azin1	antizyme inhibitor 1	-	tolerated	ENSMUSG00000037458	4.09178e-07	8.39161e-07	0.342657	0.276231	-	17.3333	9.01	6.59333	19.06
Scg3:chr9:75669381	2.95085e-10	3.53438e-07	0.0410763	NA	FALSE	synonymous_variant	p.A237=	c.711A>G	protein_coding	Scg3	secretogranin III	-	-	ENSMUSG00000032181	0.000231959	0.000283505	0.100968	0.75487	-	0	1.76	0	0
Slfn5:chr11:82963277	0.000665996	0.017436	3.74684e-10	NA	TRUE	3_prime_UTR_variant	-	c.*1573A>G	protein_coding	Slfn5	schlafen 5	-	-	ENSMUSG00000054404	4.39964e-12	8.19752e-11	0.27972	0.378709	B1_Mus1	6.92333	4.81333	4.62	9.44667
Phc2:chr4:128752199	0.0016317	0.0312699	7.97147e-10	NA	FALSE	3_prime_UTR_variant	-	c.*545A>G	protein_coding	Phc2	polyhomeotic 2	-	-	ENSMUSG00000028796	8.38838e-06	1.28752e-05	NA	NA	-	5.76667	2.07333	2.33333	7.62333
Cp:chr3:19989064	0.0336892	0.187462	1.15912e-09	0.025	FALSE	synonymous_variant	p.V1004=	c.3012A>G	protein_coding	Cp	ceruloplasmin	-	-	ENSMUSG00000003617	4.48202e-13	1.35581e-11	NA	NA	-	1.33333	1.38	1.14667	0.306667
Spock2:chr10:60133278	5.98043e-05	0.0038203	3.13301e-09	NA	TRUE	3_prime_UTR_variant	-	c.*1797A>G	protein_coding	Spock2	sparc/osteonectin, cwcv and kazal-like domains proteoglycan 2	-	-	ENSMUSG00000058297	1.75983e-10	1.34912e-09	NA	NA	-	14.18	11.5767	14.2267	21.7433
Ovca2:chr11:75176432	2.43439e-08	1.48128e-05	3.60057e-09	NA	TRUE	3_prime_UTR_variant	-	c.*1462A>G	protein_coding	Ovca2	candidate tumor suppressor in ovarian cancer 2	rs864257679	-	ENSMUSG00000038268	2.17581e-06	3.66505e-06	NA	NA	-	49.2667	32.4767	33.7833	63.6867
Azi2:chr9:118062623	3.8875e-05	0.00279174	1.43886e-08	NA	TRUE	3_prime_UTR_variant	-	c.*497A>G	protein_coding	Azi2	5-azacytidine induced gene 2	-	-	ENSMUSG00000039285	2.09436e-12	4.6076e-11	NA	NA	-	4.04333	2.56667	1.34	13.5267
Slfn5:chr11:82963283	0.000585827	0.0163523	2.05839e-08	NA	FALSE	3_prime_UTR_variant	-	c.*1579A>G	protein_coding	Slfn5	schlafen 5	-	-	ENSMUSG00000054404	4.39964e-12	8.19752e-11	NA	NA	B1_Mus1	2.76667	2.22	3.38667	5.79333
Gm43951:chr11:72163070	2.16351e-08	1.48128e-05	0.0718958	NA	TRUE	intron_variant	-	c.2416+2447A>G	protein_coding	Gm43951	predicted gene, 43951	-	-	ENSMUSG00000107877	0.00125365	0.00144469	0.512348	0.194223	B3A	11.79	21.765	0	NA
Trnt1:chr6:106778306	2.64158e-08	1.48128e-05	0.215196	NA	FALSE	intron_variant	-	c.802+195A>G	protein_coding	Trnt1	tRNA nucleotidyl transferase, CCA-adding, 1	-	-	ENSMUSG00000013736	0.00128833	0.00147761	NA	NA	-	0	5.85667	0	0
Slc6a6:chr6:91757017	2.78263e-08	1.48128e-05	3.84307e-08	NA	TRUE	3_prime_UTR_variant	-	c.*1960A>G	protein_coding	Slc6a6	solute carrier family 6 (neurotransmitter transporter, taurine), member 6	-	-	ENSMUSG00000030096	4.30027e-10	2.66837e-09	-0.433566	0.161446	-	1.06333	0.656667	0.95	4.03
Gm40841:chr13:28403407	3.32992e-08	1.59537e-05	0.113705	NA	TRUE	intron_variant,non_coding_transcript_variant	-	n.904+5377A>G	lincRNA	Gm40841	predicted gene, 40841	-	-	ENSMUSG00000113216	4.32884e-08	1.19496e-07	0.400091	0.285986	Lx5c	19.63	23.74	50	22.22
Sod2:chr17:13017188	3.78524e-08	1.64864e-05	0.0310715	NA	TRUE	3_prime_UTR_variant	-	c.*2017A>G	protein_coding	Sod2	superoxide dismutase 2, mitochondrial	-	-	ENSMUSG00000006818	6.13839e-13	1.71403e-11	NA	NA	Lx7	0	0	0	3.11
Rab6a:chr7:100639568	3.30803e-07	7.204e-05	4.12536e-08	NA	TRUE	3_prime_UTR_variant	-	c.*249A>G	protein_coding	Rab6a	RAB6A, member RAS oncogene family	-	-	ENSMUSG00000030704	0.000203691	0.000251496	NA	NA	-	1.20333	0.51	1.92667	7.91333
Bbs2:chr8:94080123	8.28651e-08	3.30839e-05	0.130703	NA	TRUE	intron_variant	-	c.1398-511A>G	protein_coding	Bbs2	Bardet-Biedl syndrome 2 (human)	-	-	ENSMUSG00000031755	7.25616e-06	1.12211e-05	0.495663	0.101271	B1_Mus1	0	7.21667	0	0
Rhoa:chr9:108337339	9.5017e-08	3.50174e-05	1.25157e-05	NA	FALSE	3_prime_UTR_variant	-	c.*518A>G	protein_coding	Rhoa	ras homolog family member A	-	-	ENSMUSG00000007815	1.12116e-05	1.67138e-05	-0.297724	0.347291	-	0.693333	0.73	0.936667	2.51
Crat:chr2:30405722	1.15893e-07	3.96604e-05	0.0916343	NA	FALSE	intron_variant	-	c.1086-218A>G	protein_coding	Crat	carnitine acetyltransferase	-	-	ENSMUSG00000026853	2.48556e-11	2.77618e-10	0.624169	0.0300595	B1_Mur1	0	8.62333	0	0
Ttc5:chr14:50774141	1.35473e-07	4.32701e-05	0.00234238	NA	TRUE	intron_variant	-	c.640-808A>G	protein_coding	Ttc5	tetratricopeptide repeat domain 5	-	-	ENSMUSG00000006288	3.26884e-07	6.81948e-07	-0.0184637	0.959624	B2_Mm1t	2.38	34.5	13.4267	0
Slfn5:chr11:82962600	0.00171248	0.0318709	1.4143e-07	NA	TRUE	3_prime_UTR_variant	-	c.*896A>G	protein_coding	Slfn5	schlafen 5	-	-	ENSMUSG00000054404	4.39964e-12	8.19752e-11	0.440559	0.154216	B1_Mus2	9.81667	10.1233	10.9867	16.3767
Serping1:chr2:84770522	1.47349e-07	4.41219e-05	0.0329109	NA	FALSE	intron_variant	-	c.701-226A>G	protein_coding	Serping1	serine (or cysteine) peptidase inhibitor, clade G, member 1	-	-	ENSMUSG00000023224	4.60861e-09	1.8184e-08	-0.7	0.233333	B1_Mur1	33.33	NA	60	16.3033
Spock2:chr10:60132705	1.94715e-07	5.48754e-05	0.0002658	NA	FALSE	3_prime_UTR_variant	-	c.*1224A>G	protein_coding	Spock2	sparc/osteonectin, cwcv and kazal-like domains proteoglycan 2	-	-	ENSMUSG00000058297	1.75983e-10	1.34912e-09	-0.503497	0.0987516	-	6.51333	6.17667	6.18667	11.5167
Spock2:chr10:60133920	1.93253e-06	0.000356106	2.32215e-07	NA	FALSE	3_prime_UTR_variant	-	c.*2439A>G	protein_coding	Spock2	sparc/osteonectin, cwcv and kazal-like domains proteoglycan 2	-	-	ENSMUSG00000058297	1.75983e-10	1.34912e-09	-0.476358	0.117442	-	0.88	0.763333	0.63	3.38
Kif9:chr9:110509011	2.50856e-07	6.32554e-05	0.111662	NA	FALSE	intron_variant	-	c.1234-447A>G	protein_coding	Kif9	kinesin family member 9	-	-	ENSMUSG00000032489	2.98104e-09	1.28823e-08	0.0727393	0.864094	B3	33.33	12.5	15.7833	0
Palm:chr10:79818847	2.97265e-07	6.98042e-05	0.00168775	NA	TRUE	intron_variant	-	c.632-194A>G	protein_coding	Palm	paralemmin	-	-	ENSMUSG00000035863	7.63743e-11	6.8454e-10	0.00606061	1	PB1D7	12.26	9.72333	8.04333	62.5
Ywhab:chr2:164017031	3.05967e-07	6.98042e-05	0.00124126	NA	FALSE	3_prime_UTR_variant	-	c.*306A>G	protein_coding	Ywhab	tyrosine 3-monooxygenase/tryptophan 5-monooxygenase activation protein, beta polypeptide	-	-	ENSMUSG00000018326	1.25748e-05	1.86313e-05	-0.388162	0.212449	-	0.406667	0.16	0	1.92667
Dtx3l:chr16:35928048	3.60281e-07	7.50482e-05	1	NA	FALSE	3_prime_UTR_variant	-	c.*1251A>G	protein_coding	Dtx3l	deltex 3-like, E3 ubiquitin ligase	-	-	ENSMUSG00000049502	3.86985e-13	1.27705e-11	NA	NA	B1_Mus2	0	0	0	1.61333
Ywhag:chr5:135909342	3.60776e-05	0.00270074	4.12024e-07	NA	TRUE	3_prime_UTR_variant	-	c.*1653A>G	protein_coding	Ywhag	tyrosine 3-monooxygenase/tryptophan 5-monooxygenase activation protein, gamma polypeptide	-	-	ENSMUSG00000051391	6.69188e-08	1.71672e-07	0.440559	0.154216	-	6.80667	7.11	8.95667	15.0133
Tra2a:chr6:49254628	1.36187e-05	0.00130494	5.12237e-07	NA	TRUE	intron_variant	-	c.37-2113A>G	protein_coding	Tra2a	transformer 2 alpha	rs864261172	-	ENSMUSG00000029817	4.92873e-10	3.03242e-09	-0.34965	0.266004	B3	37.4067	55.4367	39.2133	22.1767
Fgf14:chr14:124268505	6.32542e-07	0.000126271	0.00515386	NA	TRUE	intron_variant	-	c.209-132213A>G	protein_coding	Fgf14	fibroblast growth factor 14	-	-	ENSMUSG00000025551	7.09016e-05	9.27469e-05	0.573427	0.0554813	Lx5c	5.80667	33.12	23.99	10.5367
Gls:chr1:52187395	3.90412e-05	0.00279174	8.44393e-07	NA	TRUE	intron_variant	-	c.1665+1284A>G	protein_coding	Gls	glutaminase	-	-	ENSMUSG00000026103	2.64826e-09	1.17953e-08	0.528897	0.0770524	AT_rich	26.4833	27.3067	31.0233	56.7433
Dcun1d3:chr7:119856235	0.000509278	0.0148778	8.48933e-07	NA	FALSE	3_prime_UTR_variant	-	c.*1338A>G	protein_coding	Dcun1d3	DCN1, defective in cullin neddylation 1, domain containing 3 (S. cerevisiae)	-	-	ENSMUSG00000048787	9.63367e-07	1.79334e-06	0.20423	0.524324	(TA)n	3.09	0.853333	1.93667	14.4233
Myl12b:chr17:70977686	1.15667e-06	0.000221665	0.26081	NA	FALSE	intron_variant	-	c.-15-440A>G	protein_coding	Myl12b	myosin, light chain 12B, regulatory	-	-	ENSMUSG00000034868	0.000228305	0.00027951	-0.101274	0.795442	B1_Mm	12.5	0	15.5867	18.2833
Ppp3r1:chr11:17199744	8.18243e-05	0.00478074	1.23791e-06	NA	TRUE	3_prime_UTR_variant	-	c.*1438A>G	protein_coding	Ppp3r1	protein phosphatase 3, regulatory subunit B, alpha isoform (calcineurin B, type I)	-	-	ENSMUSG00000033953	5.72312e-07	1.12907e-06	-0.511329	0.0892974	-	0.126667	0.63	0	2.83667
Trim12a:chr7:104312697	2.23394e-06	0.000396399	0.128604	NA	FALSE	intron_variant	-	c.-57+2714A>G	protein_coding	Trim12a	tripartite motif-containing 12A	-	-	ENSMUSG00000066258	3.34895e-10	2.17083e-09	-0.547619	0.170982	B1_Mus1	28.9667	60	16.67	15.95
Cisd2:chr3:135406870	0.00337951	0.0466606	2.27171e-06	NA	TRUE	3_prime_UTR_variant	-	c.*1931A>G	protein_coding	Cisd2	CDGSH iron sulfur domain 2	-	-	ENSMUSG00000028165	0.0912191	0.0948783	-0.153846	0.63514	B3	1.91333	12.47	5.11	4.02333
Iqgap1:chr7:80712391	2.38152e-06	0.000407494	3.06085e-05	NA	FALSE	3_prime_UTR_variant	-	c.*1441A>G	protein_coding	Iqgap1	IQ motif containing GTPase activating protein 1	-	-	ENSMUSG00000030536	6.05846e-07	1.18556e-06	NA	NA	PB1D7	1.16333	0.11	0.536667	2.25333
Icam1:chr9:21017201	0.00343048	0.0469584	2.75428e-06	NA	FALSE	intron_variant	-	c.67+1100A>G	protein_coding	Icam1	intercellular adhesion molecule 1	-	-	ENSMUSG00000037405	5.49325e-12	9.41822e-11	0.771429	0.102778	B1_Mur3	NA	NA	11.6133	63.6133
Pmpca:chr2:26396549	2.9501e-06	0.000443471	0.00174619	NA	FALSE	3_prime_UTR_variant	-	c.*961A>G	protein_coding	Pmpca	peptidase (mitochondrial processing) alpha	-	-	ENSMUSG00000026926	0.00692011	0.00753223	-0.381787	0.220708	B1_Mus2	4.17333	2.68	3.23667	9.49
Ska2:chr11:87124327	2.96203e-06	0.000443471	0.0870197	NA	FALSE	3_prime_UTR_variant	-	c.*2328A>G	protein_coding	Ska2	spindle and kinetochore associated complex subunit 2	-	-	ENSMUSG00000020492	9.89094e-09	3.50284e-08	0.339621	0.280123	B2_Mm2	0	3.50667	0	0
Tmem38a:chr8:72584304	3.49185e-06	0.000506954	0.0772328	NA	TRUE	intron_variant	-	c.555-396A>G	protein_coding	Tmem38a	transmembrane protein 38A	-	-	ENSMUSG00000031791	3.25334e-10	2.12786e-09	NA	NA	B1_Mus1	0	12.3233	0	NA
2900026A02Rik:chr5:113087496	3.99701e-06	0.000563226	0.000727313	NA	TRUE	3_prime_UTR_variant	-	c.*3533A>G	protein_coding	2900026A02Rik	RIKEN cDNA 2900026A02 gene	-	-	ENSMUSG00000051339	3.44864e-11	3.62857e-10	0.251748	0.430115	-	31.3733	42.3733	42.3733	22.3633
Icam1:chr9:21020522	4.63392e-06	0.000611648	6.39351e-05	NA	FALSE	intron_variant	-	c.328+1343A>G	protein_coding	Icam1	intercellular adhesion molecule 1	-	-	ENSMUSG00000037405	5.49325e-12	9.41822e-11	-0.394376	0.204582	B1_Mur1	19.7633	1.58667	0.676667	3.38
Dcun1d3:chr7:119856274	4.72365e-06	0.000611648	0.000245106	NA	FALSE	3_prime_UTR_variant	-	c.*1299A>G	protein_coding	Dcun1d3	DCN1, defective in cullin neddylation 1, domain containing 3 (S. cerevisiae)	-	-	ENSMUSG00000048787	9.63367e-07	1.79334e-06	NA	NA	(TA)n	3.22667	6.41	3.64333	16.7667
Selenop:chr15:3280063	0.00103064	0.0235133	5.09496e-06	NA	TRUE	3_prime_UTR_variant	-	c.*353A>G	protein_coding	Selenop	selenoprotein P	-	-	ENSMUSG00000064373	7.26635e-10	4.28892e-09	NA	NA	-	6.20667	4.42	4.78333	6.16333
Igfbp7:chr5:77407783	7.15288e-06	0.000878704	0.000229828	NA	TRUE	missense_variant	p.R78G	c.232A>G	protein_coding	Igfbp7	insulin-like growth factor binding protein 7	rs13473155	tolerated	ENSMUSG00000036256	2.53577e-05	3.59564e-05	-0.160839	0.619356	-	95.3867	93.95	94.6	94.2567
Rpa1:chr11:75301008	8.10154e-06	0.000970362	0.0173624	NA	TRUE	3_prime_UTR_variant	-	c.*297A>G	protein_coding	Rpa1	replication protein A1	-	-	ENSMUSG00000000751	1.85843e-08	5.7659e-08	0.539704	0.0701203	-	5.25667	6.01667	4.16	0
Crocc:chr4:141023832	8.44313e-06	0.000986611	0.00279531	NA	TRUE	intron_variant	-	c.4384+1364A>G	protein_coding	Crocc	ciliary rootlet coiled-coil, rootletin	-	-	ENSMUSG00000040860	5.40789e-08	1.43289e-07	-0.0452556	0.901206	B1F2	3.70333	8.42667	0	37.5
Tmco6:chr18:36741291	8.67773e-06	0.000986951	0.0541021	NA	FALSE	intron_variant	-	c.1200+145A>G	protein_coding	Tmco6	transmembrane and coiled-coil domains 6	-	-	ENSMUSG00000006850	7.01744e-08	1.76286e-07	-0.461315	0.131159	B1_Mus1	0	6.69667	2.38	15.7833
Tspan14:chr14:40907022	8.85805e-06	0.000986951	1.58939e-05	NA	TRUE	3_prime_UTR_variant	-	c.*1036A>G	protein_coding	Tspan14	tetraspanin 14	-	-	ENSMUSG00000037824	8.21042e-06	1.26287e-05	-0.503497	0.0987516	-	3.78667	3.3	3.38	10.65
Gnb4:chr3:32584090	9.15967e-06	0.00099091	3.93311e-05	NA	FALSE	3_prime_UTR_variant	-	c.*1030A>G	protein_coding	Gnb4	guanine nucleotide binding protein (G protein), beta 4	-	-	ENSMUSG00000027669	2.27748e-10	1.67015e-09	0.433566	0.161446	RLTR17B_Mm	4.2	5.81667	8.4	20.4033
Ccn3:chr15:54753094	9.30723e-06	0.00099091	0.00657248	NA	FALSE	3_prime_UTR_variant	-	c.*589A>G	protein_coding	Ccn3	nephroblastoma overexpressed gene	-	-	ENSMUSG00000037362	1.4545e-06	2.58183e-06	-0.210283	0.511828	-	0	1.29667	0.3	2.68
Map4k2:chr19:6354234	9.68997e-06	0.00100923	0.00156986	NA	TRUE	3_prime_UTR_variant	-	c.*707A>G	protein_coding	Map4k2	mitogen-activated protein kinase kinase kinase kinase 2	-	-	ENSMUSG00000024948	2.39979e-10	1.6915e-09	-0.437829	0.154586	-	1.01	1.40333	0.83	4.01667
Zbtb4:chr11:69783297	1.09078e-05	0.0011119	0.146617	NA	FALSE	3_prime_UTR_variant	-	c.*3896A>G	protein_coding	Zbtb4	zinc finger and BTB domain containing 4	-	-	ENSMUSG00000018750	4.59873e-08	1.25988e-07	0.293726	0.354113	ID_B1,PB1D7	3.22	0	0	0
Nol10:chr12:17429793	1.14654e-05	0.00114439	0.421002	NA	FALSE	3_prime_UTR_variant	-	c.*559A>G	protein_coding	Nol10	nucleolar protein 10	-	-	ENSMUSG00000061458	1.21544e-11	1.53963e-10	NA	NA	B1_Mur3	0	0	0	2.15
Gypc:chr18:32547047	1.19025e-05	0.00116377	0.564248	NA	FALSE	intron_variant	-	c.40+12739A>G	protein_coding	Gypc	glycophorin C	-	-	ENSMUSG00000090523	2.12399e-05	3.05956e-05	-0.316228	0.683772	B1_Mm	0	NA	NA	18.7867
Cox7b:chrX:106018738	9.89588e-05	0.00551292	1.36272e-05	NA	FALSE	intron_variant	-	c.41-841A>G	protein_coding	Cox7b	cytochrome c oxidase subunit 7B	-	-	ENSMUSG00000031231	3.58568e-05	4.93967e-05	0.369021	0.264066	B2_Mm1t	10.0667	57.6933	44.78	8.335
Eed:chr7:89955251	1.48702e-05	0.00139692	0.155463	NA	FALSE	intron_variant	-	c.1200-188A>G	protein_coding	Eed	embryonic ectoderm development	-	-	ENSMUSG00000030619	0.0874237	0.0910611	0.329529	0.322371	B1_Mus1	0	9.02667	0	0
Dtx3l:chr16:35928036	1.52168e-05	0.00140199	0.647753	NA	FALSE	3_prime_UTR_variant	-	c.*1263A>G	protein_coding	Dtx3l	deltex 3-like, E3 ubiquitin ligase	-	-	ENSMUSG00000049502	3.86985e-13	1.27705e-11	NA	NA	B1_Mus2	0	0	0	2.38333
Noct:chr3:51246034	1.58599e-05	0.00143367	0.163083	NA	TRUE	intron_variant	-	c.185-1771A>G	protein_coding	Noct	nocturnin	-	-	ENSMUSG00000023087	9.41139e-14	5.44599e-12	0.0833333	0.843182	B1_Mur2,MT2B	0	17.425	5.81667	10.3833
Crocc:chr4:141023019	0.0139208	0.11285	1.73505e-05	0.013	TRUE	intron_variant	-	c.4385-582A>G	protein_coding	Crocc	ciliary rootlet coiled-coil, rootletin	-	-	ENSMUSG00000040860	5.40789e-08	1.43289e-07	-0.175132	0.586158	B3	14.26	31.62	18.2533	63.89
Tm6sf1:chr7:81872302	1.79795e-05	0.00159518	0.0362251	NA	TRUE	intron_variant	-	c.603+812A>G	protein_coding	Tm6sf1	transmembrane 6 superfamily member 1	-	-	ENSMUSG00000038623	1.72429e-08	5.39585e-08	0.250122	0.485822	B1_Mus2	7.11	7.14333	0	40
Nr3c1:chr18:39410975	1.92357e-05	0.00167561	0.000138468	NA	FALSE	3_prime_UTR_variant	-	c.*3507A>G	protein_coding	Nr3c1	nuclear receptor subfamily 3, group C, member 1	-	-	ENSMUSG00000024431	0.00888042	0.00956556	0.309658	0.327349	-	0.736667	0.193333	0.446667	3.2
Igfbp7:chr5:77407731	0.00169548	0.0318709	2.03892e-05	NA	TRUE	missense_variant	p.K95R	c.284A>G	protein_coding	Igfbp7	insulin-like growth factor binding protein 7	rs13473154	tolerated	ENSMUSG00000036256	2.53577e-05	3.59564e-05	-0.531469	0.0793029	-	92.89	91.7033	92.2767	91.1333
Septin2:chr1:93509088	2.08917e-05	0.00178736	0.000506081	NA	TRUE	3_prime_UTR_variant	-	c.*1394A>G	protein_coding	Septin2	septin 2	-	-	ENSMUSG00000026276	0.0318928	0.0337033	0.251748	0.430115	-	8.45667	4.71667	4.58667	6.97667
Pcdhgc5:chr18:37840383	0.00428523	0.0541702	2.17731e-05	0.041	FALSE	3_prime_UTR_variant	-	c.*254A>G	protein_coding	Pcdhgc5	protocadherin gamma subfamily C, 5	-	-	ENSMUSG00000102543	0.271132	0.275303	-0.0559441	0.86898	-	4.88333	3.16	4.49667	8.54
Cds2:chr2:132309884	2.42111e-05	0.00203501	0.0348893	NA	TRUE	3_prime_UTR_variant	-	c.*4599A>G	protein_coding	Cds2	CDP-diacylglycerol synthase (phosphatidate cytidylyltransferase) 2	-	-	ENSMUSG00000058793	1.04373e-07	2.4905e-07	NA	NA	MIRb	19.35	16.4867	14.3233	9.39333
Gm15753:chr5:137720954	0.000105056	0.00565532	2.73271e-05	NA	FALSE	non_coding_transcript_exon_variant	-	n.462A>G	unprocessed_pseudogene	Gm15753	predicted gene 15753	-	-	ENSMUSG00000082088	1.4533e-08	4.75268e-08	0.718185	0.171795	-	NA	30.95	NA	93.75
Zbtb4:chr11:69783302	2.73652e-05	0.00223992	0.00668461	NA	TRUE	3_prime_UTR_variant	-	c.*3901A>G	protein_coding	Zbtb4	zinc finger and BTB domain containing 4	-	-	ENSMUSG00000018750	4.59873e-08	1.25988e-07	0.41958	0.176577	ID_B1,PB1D7	35.4133	18.44	24.4333	12.5
Arpc5l:chr2:39012508	2.7684e-05	0.00223992	0.00293245	NA	TRUE	intron_variant	-	c.150-607A>G	protein_coding	Arpc5l	actin related protein 2/3 complex, subunit 5-like	-	-	ENSMUSG00000026755	3.99644e-05	5.46407e-05	NA	NA	B1_Mus1	2.56333	20.2	0	0
Capza2:chr6:17665568	2.80516e-05	0.00223992	0.000342565	NA	FALSE	3_prime_UTR_variant	-	c.*133A>G	protein_coding	Capza2	capping protein (actin filament) muscle Z-line, alpha 2	-	-	ENSMUSG00000015733	5.49011e-08	1.44414e-07	0.423819	0.169753	-	0.606667	1.04	0.52	2.82333
Slc6a6:chr6:91758167	3.16485e-05	0.00248571	0.00018122	NA	TRUE	3_prime_UTR_variant	-	c.*3110A>G	protein_coding	Slc6a6	solute carrier family 6 (neurotransmitter transporter, taurine), member 6	-	-	ENSMUSG00000030096	4.30027e-10	2.66837e-09	-0.482517	0.115374	-	4.64667	3.70333	4.48667	7.12667
Zfp655:chr5:145246018	3.26331e-05	0.0025217	0.000512323	NA	FALSE	3_prime_UTR_variant	-	c.*1059A>G	protein_coding	Zfp655	zinc finger protein 655	-	-	ENSMUSG00000007812	0.154961	0.158901	0.119326	0.711849	-	0	0	0	10.2567
Cds2:chr2:132309634	3.47718e-05	0.00264431	0.000542059	NA	TRUE	3_prime_UTR_variant	-	c.*4349A>G	protein_coding	Cds2	CDP-diacylglycerol synthase (phosphatidate cytidylyltransferase) 2	-	-	ENSMUSG00000058793	1.04373e-07	2.4905e-07	0.573427	0.0554813	MIRb	12.6733	7.02667	4.56333	2.59333
Eif2s3y:chrY:1016394	0.00130152	0.0278374	3.77885e-05	NA	TRUE	intron_variant	-	c.773-196A>G	protein_coding	Eif2s3y	eukaryotic translation initiation factor 2, subunit 3, structural gene Y-linked	-	-	ENSMUSG00000069049	1.45117e-05	2.13269e-05	NA	NA	B1_Mus2	16.3967	34.59	16.2133	22.0433
Rprd1a:chr18:24505993	3.81509e-05	0.00279174	0.00463754	NA	TRUE	intron_variant	-	c.789+841A>G	protein_coding	Rprd1a	regulation of nuclear pre-mRNA domain containing 1A	-	-	ENSMUSG00000040446	1.42082e-05	2.09658e-05	NA	NA	B1_Mus2	6.88333	13.9567	3.61333	0
Lrrc32:chr7:98501026	3.9702e-05	0.00279724	5.37279e-05	NA	FALSE	3_prime_UTR_variant	-	c.*1020A>G	protein_coding	Lrrc32	leucine rich repeat containing 32	-	-	ENSMUSG00000090958	2.76677e-11	3.01318e-10	0.368423	0.238639	-	0.77	0.57	0.35	2.64
Stk38:chr17:28986548	4.06235e-05	0.00282069	0.0882374	NA	TRUE	intron_variant	-	c.390+1630A>G	protein_coding	Stk38	serine/threonine kinase 38	-	-	ENSMUSG00000024006	2.51496e-09	1.1387e-08	-0.828571	0.0583333	B2_Mm2	19.3133	25	66.67	33.33
Ralyl:chr3:14181505	4.2542e-05	0.0029117	0.105988	NA	FALSE	3_prime_UTR_variant	-	c.*450A>G	protein_coding	Ralyl	RALY RNA binding protein-like	-	-	ENSMUSG00000039717	0.000412381	0.000492416	-0.350171	0.321219	-	1.85333	8.15	0	18.335
Mier3:chr13:111717718	0.000209771	0.00846079	4.57378e-05	NA	TRUE	3_prime_UTR_variant	-	c.*2577A>G	protein_coding	Mier3	MIER family member 3	-	-	ENSMUSG00000032727	0.0703143	0.073769	-0.420316	0.173686	-	6.73	2.73333	4.68	21.2067
Sdc4:chr2:164424643	0.000134392	0.00663787	4.66389e-05	NA	TRUE	3_prime_UTR_variant	-	c.*1443A>G	protein_coding	Sdc4	syndecan 4	-	-	ENSMUSG00000017009	6.40452e-13	1.7221e-11	NA	NA	MER3	0.3	0.393333	0.34	1.78333
Norad:chr2:156390419	4.97748e-05	0.00335533	0.000569559	NA	FALSE	non_coding_transcript_exon_variant	-	n.2561A>G	lincRNA	Norad	RIKEN cDNA 2900097C17 gene	-	-	ENSMUSG00000102869	7.97691e-05	0.000103415	0.660884	0.0192937	-	2.77	0	0	0
Pvr:chr7:19904691	5.04245e-05	0.00335533	0.000136836	NA	FALSE	3_prime_UTR_variant	-	c.*436A>G	protein_coding	Pvr	poliovirus receptor	-	-	ENSMUSG00000040511	6.39899e-12	1.05583e-10	0.490369	0.105548	PB1D9	3.26333	3.00667	2.49667	10.6667
Serpine1:chr5:137062692	5.40082e-05	0.0035188	0.0208299	NA	FALSE	3_prime_UTR_variant	-	c.*482A>G	protein_coding	Serpine1	serine (or cysteine) peptidase inhibitor, clade E, member 1	-	-	ENSMUSG00000037411	9.75178e-14	5.44599e-12	NA	NA	-	0	0	1.64	6.6
Azin1:chr15:38491613	0.000306231	0.0107091	5.42572e-05	NA	TRUE	synonymous_variant	p.E366=	c.1098A>G	protein_coding	Azin1	antizyme inhibitor 1	-	-	ENSMUSG00000037458	4.09178e-07	8.39161e-07	0.181818	0.572958	-	5.03	3.21	2.13333	8
Lrrc58:chr16:37886136	5.435e-05	0.0035188	0.0113407	NA	FALSE	3_prime_UTR_variant	-	c.*4674A>G	protein_coding	Lrrc58	leucine rich repeat containing 58	-	-	ENSMUSG00000034158	2.27375e-05	3.2431e-05	0.186617	0.561416	B1_Mus1	0	8.16333	1.33333	1.45667
Septin2:chr1:93509108	7.91944e-05	0.00474276	5.50954e-05	NA	FALSE	3_prime_UTR_variant	-	c.*1414A>G	protein_coding	Septin2	septin 2	-	-	ENSMUSG00000026276	0.0318928	0.0337033	0.125874	0.699712	-	0.51	0.763333	0.39	2.52333
Iqgap1:chr7:80712040	0.000124072	0.00632369	5.85672e-05	NA	FALSE	3_prime_UTR_variant	-	c.*1792A>G	protein_coding	Iqgap1	IQ motif containing GTPase activating protein 1	-	-	ENSMUSG00000030536	6.05846e-07	1.18556e-06	NA	NA	B1_Mur2	0.59	0.61	1.06	2.39667
Tmem63b:chr17:45662949	0.00158237	0.031011	6.22272e-05	NA	TRUE	missense_variant	p.Q619R	c.1856A>G	protein_coding	Tmem63b	transmembrane protein 63b	-	deleterious	ENSMUSG00000036026	7.74125e-07	1.46358e-06	0.524476	0.0838846	-	25.94	41.38	26.4833	27.8467
Rdh5:chr10:128916134	6.25527e-05	0.00394329	0.256043	NA	FALSE	intron_variant	-	c.569+1746A>G	protein_coding	Rdh5	retinol dehydrogenase 5	-	-	ENSMUSG00000025350	3.54816e-07	7.38098e-07	NA	NA	B1_Mm	2.72333	0	6.94333	0
Mlh3:chr12:85234649	0.00152953	0.0305332	6.44464e-05	NA	TRUE	3_prime_UTR_variant	-	c.*973A>G	protein_coding	Mlh3	mutL homolog 3	rs864264611	-	ENSMUSG00000021245	1.9728e-07	4.36663e-07	NA	NA	B1_Mur4	28.51	24.4733	14.2	0
Rsrc2:chr5:123742067	6.61434e-05	0.00411549	0.00115991	NA	TRUE	intron_variant	-	c.205-1205A>G	protein_coding	Rsrc2	arginine/serine-rich coiled-coil 2	-	-	ENSMUSG00000029422	8.51677e-05	0.000110217	0.297409	0.374433	B1_Mus2	2.22333	26.3	0	5.555
St3gal1:chr15:67103611	0.00390759	0.0510116	6.69623e-05	0.03	FALSE	3_prime_UTR_variant	-	c.*3046A>G	protein_coding	St3gal1	ST3 beta-galactoside alpha-2,3-sialyltransferase 1	-	-	ENSMUSG00000013846	9.93837e-12	1.36137e-10	0.403897	0.192878	-	0.553333	0.496667	0	2.63
Slc39a10:chr1:46808220	7.12911e-05	0.00433354	0.00279891	NA	FALSE	3_prime_UTR_variant	-	c.*1733A>G	protein_coding	Slc39a10	solute carrier family 39 (zinc transporter), member 10	-	-	ENSMUSG00000025986	1.32588e-10	1.09385e-09	-0.40293	0.194048	-	0.273333	0.206667	0	1.49333
Rhpn2:chr7:35391298	7.14569e-05	0.00433354	0.045326	NA	TRUE	3_prime_UTR_variant	-	c.*283A>G	protein_coding	Rhpn2	rhophilin, Rho GTPase binding protein 2	-	-	ENSMUSG00000030494	6.49707e-11	6.20641e-10	0.468531	0.127473	B1_Mus1	56.95	55.1467	50.9767	30.2767
Cds2:chr2:132309873	8.05251e-05	0.00476291	0.0142799	NA	TRUE	3_prime_UTR_variant	-	c.*4588A>G	protein_coding	Cds2	CDP-diacylglycerol synthase (phosphatidate cytidylyltransferase) 2	-	-	ENSMUSG00000058793	1.04373e-07	2.4905e-07	NA	NA	MIRb	22.0067	22.9833	19.4167	10.9467
4933434E20Rik:chr3:90060631	8.93347e-05	0.00515666	0.0154726	NA	TRUE	intron_variant	-	c.567-1007A>G	protein_coding	4933434E20Rik	RIKEN cDNA 4933434E20 gene	-	-	ENSMUSG00000027942	1.01113e-06	1.86314e-06	0.209256	0.561776	PB1D10	6.26667	26.1767	5.34	0
Arhgef12:chr9:42966207	9.19758e-05	0.0052459	0.00340595	NA	FALSE	3_prime_UTR_variant	-	c.*2975A>G	protein_coding	Arhgef12	Rho guanine nucleotide exchange factor (GEF) 12	-	-	ENSMUSG00000059495	0.00771415	0.00835891	0.195804	0.542874	-	4.75	1.9	2.22667	7.09333
Cds2:chr2:132309669	0.00263431	0.040582	9.36093e-05	NA	TRUE	3_prime_UTR_variant	-	c.*4384A>G	protein_coding	Cds2	CDP-diacylglycerol synthase (phosphatidate cytidylyltransferase) 2	-	-	ENSMUSG00000058793	1.04373e-07	2.4905e-07	NA	NA	MIRb	46.09	36.57	38.9833	21.5833
Grik5:chr7:25010643	9.42515e-05	0.00531246	0.0151063	NA	TRUE	missense_variant	p.K889R	c.2666A>G	protein_coding	Grik5	glutamate receptor, ionotropic, kainate 5 (gamma 2)	-	tolerated_low_confidence	ENSMUSG00000003378	8.80252e-09	3.21137e-08	-0.293706	0.354333	-	15.4867	17.7133	16.2733	22.7267
Ovca2:chr11:75177471	0.00287714	0.0421541	9.75529e-05	NA	TRUE	3_prime_UTR_variant	-	c.*423A>G	protein_coding	Ovca2	candidate tumor suppressor in ovarian cancer 2	-	-	ENSMUSG00000038268	2.17581e-06	3.66505e-06	NA	NA	RSINE1	13.98	3.33	4.38667	12.4533
Map6:chr7:99334225	0.000100561	0.00553778	0.148503	NA	FALSE	intron_variant	-	c.1704-1760A>G	protein_coding	Map6	microtubule-associated protein 6	-	-	ENSMUSG00000055407	5.45534e-08	1.44021e-07	NA	NA	B3	0	9.52333	0	0
Dagla:chr19:10245733	0.000102691	0.00559081	0.00191928	NA	TRUE	3_prime_UTR_variant	-	c.*1931A>G	protein_coding	Dagla	diacylglycerol lipase, alpha	-	-	ENSMUSG00000035735	1.03702e-07	2.4905e-07	NA	NA	-	16.4833	14.3833	12.3	2.64333
Flt1:chr5:147638272	0.000258922	0.00954225	0.000107284	NA	FALSE	intron_variant	-	c.1972+953A>G	protein_coding	Flt1	FMS-like tyrosine kinase 1	-	-	ENSMUSG00000029648	7.02952e-07	1.3537e-06	-0.31905	0.312104	-	0.89	0.43	0	2.19
Iqgap1:chr7:80712390	0.000423721	0.0131821	0.000108856	NA	TRUE	3_prime_UTR_variant	-	c.*1442A>G	protein_coding	Iqgap1	IQ motif containing GTPase activating protein 1	-	-	ENSMUSG00000030536	6.05846e-07	1.18556e-06	NA	NA	PB1D7	3	3.1	3.18333	6.55
Kdm3b:chr18:34838142	0.000112822	0.00600588	0.0159089	NA	FALSE	3_prime_UTR_variant	-	c.*472A>G	protein_coding	Kdm3b	KDM3B lysine (K)-specific demethylase 3B	-	-	ENSMUSG00000038773	7.75742e-05	0.000100749	NA	NA	-	0	0.743333	0	2.13
Iqgap1:chr7:80712038	0.000115195	0.00606482	0.000509256	NA	FALSE	3_prime_UTR_variant	-	c.*1794A>G	protein_coding	Iqgap1	IQ motif containing GTPase activating protein 1	-	-	ENSMUSG00000030536	6.05846e-07	1.18556e-06	NA	NA	B1_Mur2	0.753333	0.16	0.52	1.55667
Crocc:chr4:141023757	0.000119169	0.00620585	0.0554663	NA	FALSE	intron_variant	-	c.4385-1320A>G	protein_coding	Crocc	ciliary rootlet coiled-coil, rootletin	-	-	ENSMUSG00000040860	5.40789e-08	1.43289e-07	-0.346506	0.326657	B1F2	15.1333	7.22333	11.3433	50
Luc7l2:chr6:38607412	0.000121542	0.00626137	0.57268	NA	TRUE	intron_variant	-	c.1002-741A>G	protein_coding	Luc7l2	LUC7-like 2 (S. cerevisiae)	-	-	ENSMUSG00000029823	2.77916e-05	3.91022e-05	0.820783	0.088587	B1_Mus2	31.665	16.67	NA	15.48
Mrpl24:chr3:87921730	0.000127187	0.00641424	0.000140236	NA	TRUE	intron_variant	-	c.-49-87A>G	protein_coding	Mrpl24	mitochondrial ribosomal protein L24	-	-	ENSMUSG00000019710	3.34897e-06	5.48838e-06	-0.238653	0.455066	B1_Mus1	0	0	3.65333	0
Noct:chr3:51246644	0.000132538	0.00661448	0.449382	NA	FALSE	intron_variant	-	c.185-1161A>G	protein_coding	Noct	nocturnin	-	-	ENSMUSG00000023087	9.41139e-14	5.44599e-12	NA	NA	PB1D9	0	0	0.563333	2.41
Apold1:chr6:134986492	0.00318343	0.0449255	0.000141443	NA	FALSE	3_prime_UTR_variant	-	c.*2167A>G	protein_coding	Apold1	apolipoprotein L domain containing 1	-	-	ENSMUSG00000090698	3.36386e-12	6.60043e-11	0.0630474	0.845664	B1_Mur4	1.11667	1.05333	0.976667	1.98333
Serping1:chr2:84770469	0.000142657	0.00697416	0.0824981	NA	FALSE	intron_variant	-	c.701-173A>G	protein_coding	Serping1	serine (or cysteine) peptidase inhibitor, clade G, member 1	-	-	ENSMUSG00000023224	4.60861e-09	1.8184e-08	-0.0579771	0.913132	B1_Mur1	0	NA	33.33	6.73667
Icosl:chr10:78076447	0.00014684	0.00710616	0.166204	NA	FALSE	intron_variant	-	c.929-697A>G	protein_coding	Icosl	icos ligand	-	-	ENSMUSG00000000732	8.35882e-12	1.1899e-10	-0.756787	0.0489051	B1_Mus1	NA	50	22.6933	19.6833
Zmpste24:chr4:121060312	0.000151758	0.00724251	0.00491478	NA	FALSE	3_prime_UTR_variant	-	c.*684A>G	protein_coding	Zmpste24	zinc metallopeptidase, STE24	-	-	ENSMUSG00000043207	5.05224e-06	8.09697e-06	NA	NA	B1F1	0	0.476667	0	3.30333
Synpo:chr18:60605483	0.000152681	0.00724251	1	NA	FALSE	intron_variant	-	c.-335-993A>G	protein_coding	Synpo	synaptopodin	-	-	ENSMUSG00000043079	2.35742e-10	1.6892e-09	0.2	0.916667	B1_Mur3	NA	0	NA	14.0567
Gm37494:chr7:39569477	0.00015598	0.00732647	0.0325077	NA	FALSE	non_coding_transcript_exon_variant	-	n.4909A>G	lincRNA	Gm37494	predicted gene, 37494	-	-	ENSMUSG00000108621	2.37877e-09	1.09999e-08	-0.143608	0.656129	B1_Mur2	6.14667	10.8133	3.7	12.1867
Tbc1d24:chr17:24177718	0.00015938	0.00741349	0.0119229	NA	FALSE	3_prime_UTR_variant	-	c.*2975A>G	protein_coding	Tbc1d24	TBC1 domain family, member 24	-	-	ENSMUSG00000036473	1.22381e-11	1.53963e-10	NA	NA	B1F2,ID_B1	13.75	3.6	17.3633	32.5
Rel:chr11:23737221	0.000164156	0.00756223	0.329255	NA	FALSE	3_prime_UTR_variant	-	c.*5044A>G	protein_coding	Rel	reticuloendotheliosis oncogene	-	-	ENSMUSG00000020275	2.04117e-12	4.6076e-11	NA	NA	ID_B1,B1F2	0	0	1.62333	3.80333
Akap8:chr17:32304591	0.000170897	0.00771908	0.000667087	NA	TRUE	3_prime_UTR_variant	-	c.*666A>G	protein_coding	Akap8	A kinase (PRKA) anchor protein 8	-	-	ENSMUSG00000024045	3.14294e-10	2.09337e-09	-0.286713	0.366408	B1_Mus2	5.94	11.1767	6.75667	13.63
Dlgap1:chr17:70142338	0.00017104	0.00771908	0.0521188	NA	TRUE	intron_variant	-	c.-394-63899A>G	protein_coding	Dlgap1	DLG associated protein 1	-	-	ENSMUSG00000003279	7.4164e-07	1.41692e-06	NA	NA	Lx2B2	0	0.813333	7.16	5.7
Dynll1:chr5:115299242	0.000172394	0.00771908	0.0586363	NA	FALSE	intron_variant	-	c.133-409A>G	protein_coding	Dynll1	dynein light chain LC8-type 1	-	-	ENSMUSG00000009013	1.64105e-10	1.295e-09	-0.549913	0.0639767	B1_Mur3	5.02667	6.56333	8.21	19.7633
Efhd2:chr4:141858998	0.000187097	0.00822952	0.0109552	NA	TRUE	3_prime_UTR_variant	-	c.*749A>G	protein_coding	Efhd2	EF hand domain containing 2	-	-	ENSMUSG00000040659	0.00164675	0.00187389	-0.429218	0.163802	-	0.133333	0.203333	0.163333	1.3
Meaf6:chr4:125104295	0.00018723	0.00822952	1	NA	TRUE	intron_variant	-	c.533+1264A>G	protein_coding	Meaf6	MYST/Esa1-associated factor 6	-	-	ENSMUSG00000028863	2.13351e-05	3.06406e-05	0.5	1	B2_Mm2	NA	29.285	16.67	NA
Derl2:chr11:71011147	0.000191054	0.00828443	0.0320251	NA	TRUE	intron_variant	-	c.615-721A>G	protein_coding	Derl2	Der1-like domain family, member 2	-	-	ENSMUSG00000018442	8.6788e-06	1.32928e-05	-0.0613786	0.885204	B1_Mus2	3.33333	20	34.285	0
Zfp771:chr7:127254322	0.00459865	0.0566379	0.000191134	0.023	TRUE	missense_variant	p.K220R	c.659A>G	protein_coding	Zfp771	zinc finger protein 771	-	tolerated	ENSMUSG00000054716	1.16563e-06	2.12334e-06	-0.370629	0.236732	-	7.86	16.6833	17.3933	19.4367
Ccdc47:chr11:106198765	0.000191937	0.00828443	0.0636228	NA	FALSE	3_prime_UTR_variant	-	c.*2171A>G	protein_coding	Ccdc47	coiled-coil domain containing 47	-	-	ENSMUSG00000078622	5.25765e-07	1.05444e-06	0.484345	0.131113	B1_Mus1	10.4333	2.22333	0	0
Irak2:chr6:113694869	0.00019891	0.00846079	0.0146421	NA	FALSE	3_prime_UTR_variant	-	c.*1089A>G	protein_coding	Irak2	interleukin-1 receptor-associated kinase 2	-	-	ENSMUSG00000060477	8.76244e-12	1.22337e-10	0.553341	0.0620005	B1_Mm	0	0.47	0	2.01
Pcdh19:chrX:133583477	0.000201325	0.00846079	0.0119332	NA	FALSE	3_prime_UTR_variant	-	c.*4511A>G	protein_coding	Pcdh19	protocadherin 19	-	-	ENSMUSG00000051323	4.68586e-12	8.29741e-11	NA	NA	-	0	0.64	0	3.27
Man2a2:chr7:80349696	0.000203261	0.00846079	0.0290708	NA	FALSE	3_prime_UTR_variant	-	c.*2003A>G	protein_coding	Man2a2	mannosidase 2, alpha 2	-	-	ENSMUSG00000038886	1.51988e-06	2.68475e-06	-0.0245184	0.93971	B1_Mus1	0.31	2.93667	1.37333	2.07333
Chsy1:chr7:66173734	0.000205699	0.00846079	0.0287448	NA	FALSE	3_prime_UTR_variant	-	c.*1313A>G	protein_coding	Chsy1	chondroitin sulfate synthase 1	-	-	ENSMUSG00000032640	2.13166e-06	3.59904e-06	NA	NA	-	0	4.23667	2.56333	13.56
Rpa1:chr11:75301000	0.000206073	0.00846079	0.0191376	NA	TRUE	3_prime_UTR_variant	-	c.*305A>G	protein_coding	Rpa1	replication protein A1	-	-	ENSMUSG00000000751	1.85843e-08	5.7659e-08	0.0559441	0.86898	-	57.61	64.0667	51.6533	52.8633
Fnbp1:chr2:31030942	0.000213854	0.00846079	0.0472649	NA	TRUE	intron_variant	-	c.1844-2059A>G	protein_coding	Fnbp1	formin binding protein 1	-	-	ENSMUSG00000075415	8.70884e-08	2.12883e-07	0.194938	0.565699	B1_Mur4	15.5867	9.44667	0	15.48
Prxl2c:chr13:64290157	0.000214658	0.00846079	0.103475	NA	FALSE	3_prime_UTR_variant	-	c.*1944A>G	protein_coding	Prxl2c	AhpC/TSA antioxidant enzyme domain containing 1	-	-	ENSMUSG00000021482	3.39388e-10	2.18049e-09	0.429588	0.163399	PB1D9	0.906667	2.82333	1.80333	0
Bcan:chr3:87990545	0.000214862	0.00846079	0.0102579	NA	TRUE	intron_variant	-	c.1978+130A>G	protein_coding	Bcan	brevican	-	-	ENSMUSG00000004892	6.95115e-08	1.75837e-07	-0.296128	0.376592	-	9.66667	16.3767	12.2633	50
Pum2:chr12:8750515	0.000216672	0.00846079	0.0110024	NA	FALSE	3_prime_UTR_variant	-	c.*795A>G	protein_coding	Pum2	pumilio RNA-binding family member 2	-	-	ENSMUSG00000020594	0.0110452	0.0118098	0.487622	0.107814	-	2.98333	1.42333	0	3.15667
Ube2o:chr11:116581137	0.000216983	0.00846079	0.000493098	NA	TRUE	missense_variant	p.S93G	c.277A>G	protein_coding	Ube2o	ubiquitin-conjugating enzyme E2O	-	tolerated	ENSMUSG00000020802	4.16137e-10	2.60444e-09	NA	NA	-	26.2267	52.94	29.7	10.2267
Gm42878:chr5:121545448	0.000217215	0.00846079	0.0012584	NA	TRUE	5_prime_UTR_variant	-	c.-248A>G	nonsense_mediated_decay	Gm42878	predicted gene 42878	-	-	ENSMUSG00000105340	NA	NA	NA	NA	-	2.87333	10.9767	5.87333	3.59333
Nsmce4a:chr7:130547259	0.000221693	0.00854302	0.189107	NA	FALSE	missense_variant	p.S6G	c.16A>G	protein_coding	Nsmce4a	NSE4 homolog A, SMC5-SMC6 complex component	-	tolerated_low_confidence	ENSMUSG00000040331	9.68407e-06	1.46777e-05	0.421092	0.17281	-	0.82	1.87	0	0
Gm26992:chrX:103460467	0.000222892	0.00854302	0.376254	NA	FALSE	intron_variant	-	c.38-20808A>G	protein_coding	Gm26992	predicted gene, 26992	-	-	ENSMUSG00000098078	NA	NA	NA	NA	-	3.06333	0.666667	0	2.12333
Lamp2:chrX:38420328	0.000228063	0.00867182	0.0113027	NA	TRUE	intron_variant	-	c.1108+3939A>G	protein_coding	Lamp2	lysosomal-associated membrane protein 2	rs13469201	-	ENSMUSG00000016534	3.73125e-09	1.52185e-08	0.220676	0.490683	-	0.553333	1.21667	0	1.72667
Cpt1c:chr7:44968604	0.000233007	0.00879006	0.00116345	NA	TRUE	intron_variant	-	c.694-1472A>G	protein_coding	Cpt1c	carnitine palmitoyltransferase 1c	-	-	ENSMUSG00000007783	8.36976e-09	3.08449e-08	NA	NA	B3	10.8333	59.7233	25.8733	NA
Mapk1ip1l:chr14:47319972	0.000239044	0.00894733	0.0104414	NA	TRUE	3_prime_UTR_variant	-	c.*549A>G	protein_coding	Mapk1ip1l	mitogen-activated protein kinase 1 interacting protein 1-like	-	-	ENSMUSG00000021840	0.000103636	0.000132232	0.497374	0.0999139	-	6.02667	15.77	5.82	19.1333
Bok:chr1:93695368	0.000490173	0.0144075	0.000249439	NA	TRUE	3_prime_UTR_variant	-	c.*206A>G	protein_coding	Bok	BCL2-related ovarian killer	-	-	ENSMUSG00000026278	1.08651e-08	3.77634e-08	NA	NA	-	16.8967	8.62	7.10667	4.69667
Flt1:chr5:147635853	0.000253764	0.00942469	0.0462737	NA	FALSE	intron_variant	-	c.1973-1330A>G	protein_coding	Flt1	FMS-like tyrosine kinase 1	-	-	ENSMUSG00000029648	7.02952e-07	1.3537e-06	-0.545455	0.0706789	-	0.753333	0.713333	0.736667	1.70667
Exosc10:chr4:148577346	0.000266896	0.00976106	0.00540984	NA	TRUE	intron_variant	-	c.2158-1072A>G	protein_coding	Exosc10	exosome component 10	-	-	ENSMUSG00000017264	0.000321531	0.00038776	-0.0138262	0.967817	B1_Mm	0	31.9033	22.4733	16.67
Snrnp48:chr13:38220504	0.000270736	0.0098265	0.00677618	NA	FALSE	intron_variant	-	c.718-184A>G	protein_coding	Snrnp48	small nuclear ribonucleoprotein 48 (U11/U12)	-	-	ENSMUSG00000021431	4.38721e-07	8.87219e-07	NA	NA	B2_Mm2	0	3.31	0	0
Dync2li1:chr17:84654234	0.000282861	0.0101532	0.143184	NA	FALSE	intron_variant	-	c.994-1067A>G	protein_coding	Dync2li1	dynein cytoplasmic 2 light intermediate chain 1	-	-	ENSMUSG00000024253	0.000410366	0.000490817	NA	NA	B1_Mur2	18.335	42.59	13.395	42.86
Samm50:chr15:84201449	0.000283977	0.0101532	0.0491831	NA	FALSE	intron_variant	-	c.648+732A>G	protein_coding	Samm50	SAMM50 sorting and assembly machinery component	-	-	ENSMUSG00000022437	2.05495e-06	3.48574e-06	-0.177525	0.623673	-	2.08333	4.76333	3.03	40
Ankrd28:chr14:31701385	0.000287229	0.0101935	0.0393529	NA	TRUE	3_prime_UTR_variant	-	c.*635A>G	protein_coding	Ankrd28	ankyrin repeat domain 28	-	-	ENSMUSG00000014496	1.8914e-06	3.24828e-06	0.545559	0.066549	AT_rich	6.19333	0	4.34	10.4667
Fndc3a:chr14:72539217	0.00128426	0.0275914	0.000295973	NA	TRUE	3_prime_UTR_variant	-	c.*950A>G	protein_coding	Fndc3a	fibronectin type III domain containing 3A	-	-	ENSMUSG00000033487	6.08416e-15	1.10428e-12	0.311734	0.323944	-	1.79667	1.84333	3.06	7.42667
Naa35:chr13:59635522	0.000299944	0.0105664	0.210873	NA	FALSE	3_prime_UTR_variant	-	c.*1045A>G	protein_coding	Naa35	N(alpha)-acetyltransferase 35, NatC auxiliary subunit	-	-	ENSMUSG00000021555	1.49423e-08	4.84292e-08	0.391561	0.208123	-	0.396667	0.456667	1.33	0
Icam1:chr9:21020602	0.661033	0.787226	0.000309883	0.018	TRUE	intron_variant	-	c.328+1423A>G	protein_coding	Icam1	intercellular adhesion molecule 1	-	-	ENSMUSG00000037405	5.49325e-12	9.41822e-11	NA	NA	B1_Mur1	23.3333	8.71	9.18333	18.74
Hykk:chr9:54947232	0.000313949	0.0108995	0.112005	NA	FALSE	3_prime_UTR_variant	-	c.*706A>G	protein_coding	Hykk	hydroxylysine kinase 1	-	-	ENSMUSG00000035878	2.37047e-09	1.09999e-08	NA	NA	B1_Mus1	34.285	58.57	83.33	NA
Nol10:chr12:17429885	0.000317296	0.0109261	0.0004348	NA	TRUE	3_prime_UTR_variant	-	c.*651A>G	protein_coding	Nol10	nucleolar protein 10	rs864307123	-	ENSMUSG00000061458	1.21544e-11	1.53963e-10	NA	NA	B1_Mur3	17.7	7.08333	9.72333	25.57
Noct:chr3:51235933	0.000319278	0.0109261	0.0488816	NA	TRUE	intron_variant	-	c.184+10646A>G	protein_coding	Noct	nocturnin	-	-	ENSMUSG00000023087	9.41139e-14	5.44599e-12	NA	NA	MTA_Mm	NA	NA	1.85333	12.8133
Coro2b:chr9:62422774	0.00346534	0.0471079	0.000329665	NA	FALSE	intron_variant	-	c.1312-1361A>G	protein_coding	Coro2b	coronin, actin binding protein, 2B	-	-	ENSMUSG00000041729	6.21357e-09	2.37424e-08	-0.471324	0.121922	ID_B1	0.926667	1.14667	0.546667	11.8867
Ncl:chr1:86345221	0.000335386	0.011396	0.00491784	NA	FALSE	3_prime_UTR_variant	-	c.*5399A>G	protein_coding	Ncl	nucleolin	-	-	ENSMUSG00000026234	2.01166e-06	3.4203e-06	0.161976	0.615006	B1_Mur4	4	1.90333	16.55	8.52333
Rab1b:chr19:5099790	0.000340267	0.0114804	0.212524	NA	FALSE	3_prime_UTR_variant	-	c.*588A>G	protein_coding	Rab1b	RAB1B, member RAS oncogene family	-	-	ENSMUSG00000024870	3.18164e-08	9.23947e-08	0.330994	0.293298	-	0.446667	1.02	0.826667	0
Akap8:chr17:32304589	0.00185299	0.0322833	0.000348622	NA	TRUE	3_prime_UTR_variant	-	c.*668A>G	protein_coding	Akap8	A kinase (PRKA) anchor protein 8	-	-	ENSMUSG00000024045	3.14294e-10	2.09337e-09	-0.321678	0.308312	B1_Mus2	3.44667	7.68333	4.91333	11.6567
Actl6b:chr5:137567702	0.000349314	0.0117033	0.179696	NA	FALSE	intron_variant	-	c.1200+359A>G	protein_coding	Actl6b	actin-like 6B	-	-	ENSMUSG00000029712	1.62634e-09	7.97788e-09	NA	NA	B4	0	11.5167	0	NA
Eln:chr5:134743591	0.000361299	0.0119649	0.11202	NA	FALSE	intron_variant	-	c.85+3566A>G	protein_coding	Eln	elastin	-	-	ENSMUSG00000029675	2.53106e-13	9.6562e-12	0.2	0.583541	ID_B1	18.1333	9.62	13.7767	33.33
Nol10:chr12:17429660	0.00036212	0.0119649	0.00049252	NA	TRUE	3_prime_UTR_variant	-	c.*426A>G	protein_coding	Nol10	nucleolar protein 10	-	-	ENSMUSG00000061458	1.21544e-11	1.53963e-10	NA	NA	B1_Mus1	7.94667	3.16	1.58667	14.1567
Prxl2c:chr13:64291046	0.000369062	0.0120622	0.00742758	NA	FALSE	3_prime_UTR_variant	-	c.*1055A>G	protein_coding	Prxl2c	AhpC/TSA antioxidant enzyme domain containing 1	-	-	ENSMUSG00000021482	3.39388e-10	2.18049e-09	0.430824	0.162058	B1_Mus1	18.9833	29.4533	25.1633	3.70333
Ggps1:chr13:14052089	0.000371407	0.0120622	0.0535282	NA	TRUE	3_prime_UTR_variant	-	c.*1605A>G	protein_coding	Ggps1	geranylgeranyl diphosphate synthase 1	-	-	ENSMUSG00000021302	0.0769454	0.0802621	0.20979	0.513513	B3	3.94333	8.75	7.55333	2.67333
Thrap3:chr4:126169867	0.000373153	0.0120622	0.225926	NA	TRUE	intron_variant	-	c.2294+1827A>G	protein_coding	Thrap3	thyroid hormone receptor associated protein 3	-	-	ENSMUSG00000043962	0.000147684	0.000185499	NA	NA	-	11.1767	11.8233	0	0
Gm49394:chr7:142653273	0.000375135	0.0120622	0.00166357	NA	TRUE	3_prime_UTR_variant	-	c.*1137A>G	protein_coding	Gm49394	predicted gene, 49394	-	-	ENSMUSG00000115302	NA	NA	NA	NA	-	24.7833	21.9367	21.7567	18.9133
Itm2a:chrX:107397564	0.000391793	0.0125139	0.0466034	NA	FALSE	3_prime_UTR_variant	-	c.*327A>G	protein_coding	Itm2a	integral membrane protein 2A	-	-	ENSMUSG00000031239	2.56624e-10	1.78857e-09	NA	NA	-	5.42	4.96667	5.08	7.15667
Nfia:chr4:98117441	0.00039691	0.0125933	0.0591259	NA	TRUE	3_prime_UTR_variant	-	c.*6206A>G	protein_coding	Nfia	nuclear factor I/A	-	-	ENSMUSG00000028565	1.89297e-08	5.84807e-08	NA	NA	-	33.7267	29.7767	24.8933	0
Zyg11b:chr4:108232672	0.000412902	0.0130146	0.0598014	NA	FALSE	3_prime_UTR_variant	-	c.*3332A>G	protein_coding	Zyg11b	zyg-ll family member B, cell cycle regulator	-	-	ENSMUSG00000034636	1.23691e-07	2.89676e-07	0.164223	0.610043	B1_Mur2	8.62667	0	10.25	0
Rpl7l1:chr17:46775235	0.000422998	0.0131821	0.00299802	NA	FALSE	3_prime_UTR_variant	-	c.*513A>G	protein_coding	Rpl7l1	ribosomal protein L7-like 1	-	-	ENSMUSG00000063888	0.195738	0.199587	-0.288526	0.363094	PB1D9	0	0	2.68333	0.946667
Sat2:chr11:69623353	0.000429656	0.0132396	0.0404792	NA	TRUE	intron_variant	-	c.346-138A>G	protein_coding	Sat2	spermidine/spermine N1-acetyl transferase 2	-	-	ENSMUSG00000069835	2.42991e-05	3.45228e-05	NA	NA	B1_Mus1	0	17.145	18.5167	16.67
AL928616.1:chr2:84590544	0.000431094	0.0132396	0.0284882	NA	FALSE	intron_variant,non_coding_transcript_variant	-	n.72+2225A>G	processed_pseudogene	AL928616.1	NA	-	-	ENSMUSG00000118521	NA	NA	NA	NA	ID_B1	17.9167	3.51	0	0
Mfap1a:chr2:121492881	0.000440773	0.0134506	0.010295	NA	FALSE	3_prime_UTR_variant	-	c.*1784A>G	protein_coding	Mfap1a	microfibrillar-associated protein 1A	-	-	ENSMUSG00000068479	3.03445e-07	6.38554e-07	0.0709035	0.826675	B1_Mus1	0	5.97	0	1.39
Zfand3:chr17:30013239	0.00046611	0.0141337	0.0580514	NA	TRUE	intron_variant	-	c.71+7931A>G	protein_coding	Zfand3	zinc finger, AN1-type domain 3	-	-	ENSMUSG00000044477	5.71576e-05	7.58618e-05	NA	NA	PB1D9	4.16667	0	0	24.4433
Spock2:chr10:60132527	0.000469173	0.0141372	0.007559	NA	FALSE	3_prime_UTR_variant	-	c.*1046A>G	protein_coding	Spock2	sparc/osteonectin, cwcv and kazal-like domains proteoglycan 2	-	-	ENSMUSG00000058297	1.75983e-10	1.34912e-09	-0.482517	0.115374	-	1.97	2.37	1.77667	4.22
Exosc10:chr4:148577444	0.000476142	0.0142575	0.00730244	NA	TRUE	intron_variant	-	c.2158-974A>G	protein_coding	Exosc10	exosome component 10	-	-	ENSMUSG00000017264	0.000321531	0.00038776	0.229405	0.497419	B1_Mur2	2.56333	24.36	3.70333	7.145
Yars:chr4:129213245	0.000483434	0.0143859	0.475025	NA	TRUE	intron_variant	-	c.907-704A>G	protein_coding	Yars	tyrosyl-tRNA synthetase	-	-	ENSMUSG00000028811	0.00144959	0.00165472	0.592999	0.160522	B3	20	38.095	NA	19.63
Dlg2:chr7:91581063	0.000486796	0.0143965	0.0172668	NA	TRUE	intron_variant	-	c.204+131148A>G	protein_coding	Dlg2	discs large MAGUK scaffold protein 2	-	-	ENSMUSG00000052572	4.69418e-08	1.2776e-07	0.373912	0.231173	PB1D11	23.86	34.3667	55.38	18.4733
Dcaf10:chr4:45377141	0.00149018	0.0299978	0.000516668	NA	TRUE	3_prime_UTR_variant	-	c.*2864A>G	protein_coding	Dcaf10	DDB1 and CUL4 associated factor 10	-	-	ENSMUSG00000035572	0.153445	0.157688	0.0181818	0.967576	PB1D9	69.5933	28.2833	8.335	45.1867
Rpa1:chr11:75300584	0.00169735	0.0318709	0.000532	NA	TRUE	3_prime_UTR_variant	-	c.*721A>G	protein_coding	Rpa1	replication protein A1	rs13472440	-	ENSMUSG00000000751	1.85843e-08	5.7659e-08	0.552448	0.066629	-	31.7533	33.4333	24.07	16.65
Tbc1d24:chr17:24177729	0.000538397	0.0155882	0.0245822	NA	FALSE	3_prime_UTR_variant	-	c.*2964A>G	protein_coding	Tbc1d24	TBC1 domain family, member 24	-	-	ENSMUSG00000036473	1.22381e-11	1.53963e-10	-0.36784	0.265716	B1F2,ID_B1	16.8967	5.69667	3.33333	25
Gm10557:chr18:4198657	0.000540105	0.0155882	0.17238	NA	FALSE	non_coding_transcript_exon_variant	-	n.282A>G	processed_pseudogene	Gm10557	predicted gene 10557	-	-	ENSMUSG00000073647	0.00404317	0.00448144	-0.126317	0.695662	-	16.8567	23.99	3.33333	12.9033
Tgfbr3:chr5:107190657	0.000558298	0.0159301	0.0903732	NA	FALSE	intron_variant	-	c.253-12715A>G	protein_coding	Tgfbr3	transforming growth factor, beta receptor III	-	-	ENSMUSG00000029287	9.74285e-06	1.47361e-05	-0.0365301	0.915083	B1_Mur4	20.3567	25.385	43.3333	18.1633
Bmpr2:chr1:59873116	0.000558599	0.0159301	0.00651094	NA	FALSE	3_prime_UTR_variant	-	c.*2631A>G	protein_coding	Bmpr2	bone morphogenetic protein receptor, type II (serine/threonine kinase)	-	-	ENSMUSG00000067336	0.000297777	0.000361193	0.328671	0.297385	B3	10.2767	7.84667	1.9	7.53333
Ube3a:chr7:59281112	0.00778776	0.0782205	0.000569487	0.015	FALSE	intron_variant	-	c.1603-3568A>G	protein_coding	Ube3a	ubiquitin protein ligase E3A	-	-	ENSMUSG00000025326	0.00238568	0.00268112	-0.663229	0.0187194	B1_Mus2	0	5.80667	34.05	17.13
Trim12a:chr7:104312639	0.000580148	0.0163523	0.136598	NA	FALSE	intron_variant	-	c.-57+2772A>G	protein_coding	Trim12a	tripartite motif-containing 12A	-	-	ENSMUSG00000066258	3.34895e-10	2.17083e-09	-0.800132	0.030701	B1_Mus1	13.0967	NA	40	7.79333
Cds2:chr2:132309645	0.000583387	0.0163523	0.0650792	NA	TRUE	3_prime_UTR_variant	-	c.*4360A>G	protein_coding	Cds2	CDP-diacylglycerol synthase (phosphatidate cytidylyltransferase) 2	-	-	ENSMUSG00000058793	1.04373e-07	2.4905e-07	0.174825	0.58826	MIRb	6.30333	2.32333	2.24333	3.48
Luzp1:chr4:136546265	0.000587059	0.0163523	0.0201258	NA	FALSE	3_prime_UTR_variant	-	c.*872A>G	protein_coding	Luzp1	leucine zipper protein 1	-	-	ENSMUSG00000001089	0.565192	0.568323	0.0249628	0.938619	-	0	1.64	0	0.386667
Bpgm:chr6:34504850	0.000591298	0.0163752	0.00923737	NA	FALSE	3_prime_UTR_variant	-	c.*401A>G	protein_coding	Bpgm	2,3-bisphosphoglycerate mutase	-	-	ENSMUSG00000038871	0.0133372	0.0142185	-0.41958	0.176577	-	2.00333	1.84667	2.66667	6.34333
N4bp2l2:chr5:150638268	0.000599261	0.0165003	0.0308617	NA	TRUE	3_prime_UTR_variant	-	c.*4846A>G	protein_coding	N4bp2l2	NEDD4 binding protein 2-like 2	-	-	ENSMUSG00000029655	0.632299	0.634923	0.378113	0.225554	B1_Mus2	17.5033	16.2833	9.04667	0
Zmynd8:chr2:165843236	0.00209671	0.0350012	0.000599921	NA	TRUE	intron_variant	-	c.406-359A>G	protein_coding	Zmynd8	zinc finger, MYND-type containing 8	-	-	ENSMUSG00000039671	2.4025e-07	5.14517e-07	0.785714	0.0480159	B1_Mur4	9.04667	53.89	36.36	NA
Dcun1d3:chr7:119856266	0.0073163	0.0748983	0.000604009	0.044	FALSE	3_prime_UTR_variant	-	c.*1307A>G	protein_coding	Dcun1d3	DCN1, defective in cullin neddylation 1, domain containing 3 (S. cerevisiae)	-	-	ENSMUSG00000048787	9.63367e-07	1.79334e-06	0.0875658	0.786694	(TA)n	5.45	0.9	5.42	13.15
Ptgr2:chr12:84314356	0.000604487	0.0165491	0.00536721	NA	FALSE	3_prime_UTR_variant	-	c.*343A>G	protein_coding	Ptgr2	prostaglandin reductase 2	-	-	ENSMUSG00000072946	8.58111e-05	0.000110852	0.220504	0.491028	URR1A	0.74	6.02667	0	0
Nr4a1:chr15:101269227	0.000620671	0.0168956	0.132049	NA	TRUE	intron_variant	-	c.-2-856A>G	protein_coding	Nr4a1	nuclear receptor subfamily 4, group A, member 1	-	-	ENSMUSG00000023034	1.48733e-13	6.54535e-12	0.0180187	0.969415	B3A	20	2.87	7.24667	NA
Meg3:chr12:109546744	0.000631543	0.0170083	0.0765792	NA	TRUE	intron_variant,non_coding_transcript_variant	-	n.1145+202A>G	lincRNA	Meg3	maternally expressed 3	-	-	ENSMUSG00000021268	7.00714e-10	4.20843e-09	NA	NA	-	4.46333	7.32333	6.02667	0
Flnb:chr14:7937137	0.000636904	0.0170083	0.145043	NA	TRUE	intron_variant	-	c.6888+1088A>G	protein_coding	Flnb	filamin, beta	-	-	ENSMUSG00000025278	7.50376e-12	1.11178e-10	-0.339755	0.27992	-	65.1933	50.8167	45.36	53.2233
Inpp5k:chr11:75642026	0.000638959	0.0170083	0.0658034	NA	TRUE	intron_variant	-	c.830+2461A>G	protein_coding	Inpp5k	inositol polyphosphate 5-phosphatase K	-	-	ENSMUSG00000006127	4.31628e-09	1.73128e-08	0.0507346	0.905036	B1_Mus1	3.33333	19.1233	0	NA
Ovca2:chr11:75177351	0.000639009	0.0170083	0.00545025	NA	TRUE	3_prime_UTR_variant	-	c.*543A>G	protein_coding	Ovca2	candidate tumor suppressor in ovarian cancer 2	-	-	ENSMUSG00000038268	2.17581e-06	3.66505e-06	-0.31874	0.312602	-	7.66	0.903333	2.67333	2.61667
Eif2s3y:chrY:1015900	0.000648093	0.0171081	0.809204	NA	FALSE	intron_variant	-	c.638-157A>G	protein_coding	Eif2s3y	eukaryotic translation initiation factor 2, subunit 3, structural gene Y-linked	-	-	ENSMUSG00000069049	1.45117e-05	2.13269e-05	NA	NA	B2_Mm2	0	12.5933	0	0
Exd2:chr12:80491898	0.000649902	0.0171081	0.141307	NA	TRUE	intron_variant	-	c.1380-644A>G	protein_coding	Exd2	exonuclease 3'-5' domain containing 2	-	-	ENSMUSG00000032705	1.06244e-08	3.72625e-08	0.00745667	0.983689	B1_Mus1	0	3.44	0	12.5
Srpk1:chr17:28592841	0.00067293	0.0175218	0.00278405	NA	TRUE	intron_variant	-	c.1600-554A>G	protein_coding	Srpk1	serine/arginine-rich protein specific kinase 1	-	-	ENSMUSG00000004865	6.10508e-08	1.592e-07	0.497374	0.0999139	-	39.7033	76.0967	68.0567	50.5567
Tpm4:chr8:72152641	0.0031999	0.0449582	0.000680646	NA	FALSE	3_prime_UTR_variant	-	c.*817A>G	protein_coding	Tpm4	tropomyosin 4	-	-	ENSMUSG00000031799	1.3965e-07	3.2186e-07	-0.126095	0.696174	-	1.84667	0.873333	0.776667	1.59333
Itih5:chr2:10251430	0.000705267	0.0182645	0.0516949	NA	FALSE	synonymous_variant	p.V902=	c.2706A>G	protein_coding	Itih5	inter-alpha (globulin) inhibitor H5	-	-	ENSMUSG00000025780	6.79696e-11	6.24632e-10	NA	NA	-	3.10667	3.14333	3.48333	8.25
Sfxn2:chr19:46596373	0.000712146	0.0182808	0.0077503	NA	TRUE	3_prime_UTR_variant	-	c.*1602A>G	protein_coding	Sfxn2	sideroflexin 2	-	-	ENSMUSG00000025036	0.000218486	0.000267941	-0.122592	0.704273	B1_Mus2	8.07667	27.46	11.3633	13.23
Zbtb7b:chr3:89379232	0.000713527	0.0182808	0.259977	NA	TRUE	3_prime_UTR_variant	-	c.*294A>G	protein_coding	Zbtb7b	zinc finger and BTB domain containing 7B	-	-	ENSMUSG00000028042	2.67155e-09	1.18265e-08	NA	NA	RLTR20A4	6.60667	1.39	1.45	0
Acsl4:chrX:142387518	0.000718522	0.0183108	0.113163	NA	FALSE	intron_variant	-	c.-230+2787A>G	protein_coding	Acsl4	acyl-CoA synthetase long-chain family member 4	-	-	ENSMUSG00000031278	1.91105e-05	2.77484e-05	-0.588373	0.0735749	B1_Mus1	5.555	11.1133	40	8.46667
Oasl2:chr5:114909398	0.000751368	0.0190225	0.365759	NA	FALSE	intron_variant	-	c.1051-1493A>G	protein_coding	Oasl2	2'-5' oligoadenylate synthetase-like 2	-	-	ENSMUSG00000029561	2.99326e-15	7.24368e-13	0.564288	0.321723	B1_Mus1	NA	0	NA	14.27
Pih1d1:chr7:45155003	0.000754843	0.0190225	0.0557954	NA	TRUE	intron_variant	-	c.-5+463A>G	protein_coding	Pih1d1	PIH1 domain containing 1	-	-	ENSMUSG00000003423	2.59745e-09	1.16404e-08	-0.0874372	0.823005	ID_B1,B1_Mus2	6.94333	14.6533	0	NA
Mdc1:chr17:35858957	0.000763056	0.0190225	0.107964	NA	TRUE	3_prime_UTR_variant	-	c.*1327A>G	protein_coding	Mdc1	mediator of DNA damage checkpoint 1	-	-	ENSMUSG00000061607	1.63103e-08	5.17088e-08	NA	NA	B1_Mm	12.5067	14.67	8.13333	3.19333
Acvrl1:chr15:101143156	0.000765377	0.0190225	0.0133545	NA	FALSE	intron_variant	-	c.1375-187A>G	protein_coding	Acvrl1	activin A receptor, type II-like 1	-	-	ENSMUSG00000000530	7.01405e-10	4.20843e-09	-0.390909	0.236519	B1_Mus1	6.03667	7.16333	9.79	38.095
Gnl3l:chrX:150983816	0.000766298	0.0190225	0.0124311	NA	TRUE	3_prime_UTR_variant	-	c.*2288A>G	protein_coding	Gnl3l	guanine nucleotide binding protein-like 3 (nucleolar)-like	-	-	ENSMUSG00000025266	0.000319262	0.000385664	NA	NA	B1_Mus2	3.65333	2.1	4.91667	8.44667
Bmpr2:chr1:59874208	0.000775274	0.0191031	0.00552561	NA	TRUE	3_prime_UTR_variant	-	c.*3723A>G	protein_coding	Bmpr2	bone morphogenetic protein receptor, type II (serine/threonine kinase)	rs864296786	-	ENSMUSG00000067336	0.000297777	0.000361193	-0.216783	0.499115	B2_Mm2	30.32	37.48	45.0333	32.68
Ro60:chr1:143755305	0.000777522	0.0191031	0.336764	NA	FALSE	3_prime_UTR_variant	-	c.*2437A>G	protein_coding	Ro60	TROVE domain family, member 2	-	-	ENSMUSG00000018199	2.93152e-09	1.27442e-08	0.546053	0.102479	B1_Mm	10.9267	1.75333	7.89	0
Kif9:chr9:110508594	0.000790848	0.0193314	0.12602	NA	FALSE	intron_variant	-	c.1234-864A>G	protein_coding	Kif9	kinesin family member 9	-	-	ENSMUSG00000032489	2.98104e-09	1.28823e-08	0.025211	0.948668	B3	5.55667	22.22	28.5333	38.095
Slc35e2:chr4:155621470	0.00373606	0.0496692	0.000796432	NA	TRUE	3_prime_UTR_variant	-	c.*2721A>G	protein_coding	Slc35e2	solute carrier family 35, member E2	-	-	ENSMUSG00000042202	7.17675e-08	1.79049e-07	-0.45206	0.162733	B1_Mus1	23.75	5.77	1.96	27.085
Hectd4:chr5:121366056	0.000796855	0.0193793	0.395713	NA	TRUE	intron_variant	-	c.13121-413A>G	protein_coding	Hectd4	HECT domain E3 ubiquitin protein ligase 4	-	-	ENSMUSG00000042744	1.32213e-08	4.46449e-08	NA	NA	B1_Mus1	0	11.6733	0	NA
Dnajc18:chr18:35674353	0.0210912	0.144625	0.000810442	0.031	TRUE	3_prime_UTR_variant	-	c.*766A>G	protein_coding	Dnajc18	DnaJ heat shock protein family (Hsp40) member C18	rs864293925	-	ENSMUSG00000024350	1.73228e-06	3.0159e-06	-0.278128	0.381402	B1_Mur1	0	25.7633	18.5733	12.17
Rab18:chr18:6793776	0.000813649	0.0196878	0.209018	NA	TRUE	3_prime_UTR_variant	-	c.*5121A>G	protein_coding	Rab18	RAB18, member RAS oncogene family	-	-	ENSMUSG00000073639	0.00653336	0.00712195	-0.0932708	0.785036	B4	3.33333	17.6467	14.0233	0
B4galt2:chr4:117883145	0.000820822	0.0197616	0.132637	NA	TRUE	5_prime_UTR_variant	-	c.-138A>G	protein_coding	B4galt2	UDP-Gal:betaGlcNAc beta 1,4- galactosyltransferase, polypeptide 2	-	-	ENSMUSG00000028541	9.00211e-08	2.1858e-07	-0.395203	0.258334	-	0	1.39	2.08333	14.29
Rgs3:chr4:62639078	0.000852008	0.0204098	0.00882808	NA	TRUE	intron_variant	-	c.916-1639A>G	protein_coding	Rgs3	regulator of G-protein signaling 3	-	-	ENSMUSG00000059810	1.00439e-06	1.85543e-06	-0.333333	0.427877	B2_Mm2	9.26	18.3333	54.765	NA
Ythdf3:chr3:16216089	0.000864523	0.0206066	0.00192328	NA	TRUE	3_prime_UTR_variant	-	c.*2111A>G	protein_coding	Ythdf3	YTH N6-methyladenosine RNA binding protein 3	-	-	ENSMUSG00000047213	0.00642687	0.00702697	NA	NA	-	1.20667	1.28333	0.88	5.13333
Rab6b:chr9:103182126	0.000873173	0.0206145	0.191587	NA	FALSE	3_prime_UTR_variant	-	c.*880A>G	protein_coding	Rab6b	RAB6B, member RAS oncogene family	-	-	ENSMUSG00000032549	6.19473e-08	1.60049e-07	-0.352343	0.261322	-	2.03	1.88	0	5.83667
Socs7:chr11:97398013	0.000873458	0.0206145	0.00277747	NA	FALSE	3_prime_UTR_variant	-	c.*4655A>G	protein_coding	Socs7	suppressor of cytokine signaling 7	-	-	ENSMUSG00000038485	3.51782e-09	1.46778e-08	0.3993	0.198476	-	0.996667	0.636667	1.84333	4.53333
Gch1:chr14:47155050	0.000907714	0.0213179	0.0981338	NA	FALSE	3_prime_UTR_variant	-	c.*748A>G	protein_coding	Gch1	GTP cyclohydrolase 1	-	-	ENSMUSG00000037580	1.20329e-11	1.53963e-10	NA	NA	-	0	0.68	0.91	3.07
Mfap1a:chr2:121493253	0.000930573	0.0217482	0.00101569	NA	TRUE	3_prime_UTR_variant	-	c.*1412A>G	protein_coding	Mfap1a	microfibrillar-associated protein 1A	-	-	ENSMUSG00000068479	3.03445e-07	6.38554e-07	NA	NA	B1_Mus2,MT2B	19.4333	11.2967	6.97667	2.9
Son:chr16:91665209	0.000963054	0.022398	0.264507	NA	FALSE	intron_variant	-	c.6711+387A>G	protein_coding	Son	Son DNA binding protein	-	-	ENSMUSG00000022961	0.00123128	0.00142116	0.452284	0.139875	-	2.15333	0	0	1.52
Slfn5:chr11:82962207	0.00308788	0.0441614	0.000977938	NA	FALSE	3_prime_UTR_variant	-	c.*503A>G	protein_coding	Slfn5	schlafen 5	-	-	ENSMUSG00000054404	4.39964e-12	8.19752e-11	0.514097	0.0872864	-	0.546667	0.136667	0.853333	1.69333
Oasl2:chr5:114909392	0.000980976	0.0226118	1	NA	FALSE	intron_variant	-	c.1051-1499A>G	protein_coding	Oasl2	2'-5' oligoadenylate synthetase-like 2	-	-	ENSMUSG00000029561	2.99326e-15	7.24368e-13	0.872082	0.0538542	B1_Mus1	NA	0	NA	5.29667
Gabrb1:chr5:71728612	0.000983081	0.0226118	0.286783	NA	FALSE	intron_variant	-	c.240+27740A>G	protein_coding	Gabrb1	gamma-aminobutyric acid (GABA) A receptor, subunit beta 1	-	-	ENSMUSG00000029212	0.00815166	0.00880671	0.542269	0.0848244	B2_Mm2	0	12.3033	14.5367	2.77667
Vcp:chr4:42992700	0.000986404	0.0226118	0.262232	NA	TRUE	intron_variant	-	c.576+449A>G	protein_coding	Vcp	valosin containing protein	-	-	ENSMUSG00000028452	0.0086653	0.00934771	-0.251502	0.547943	B2_Mm1t	19.645	50	60	37.2367
Parp12:chr6:39092298	0.00105571	0.0239712	0.105723	NA	TRUE	intron_variant	-	c.1452-918A>G	protein_coding	Parp12	poly (ADP-ribose) polymerase family, member 12	-	-	ENSMUSG00000038507	4.72684e-13	1.37267e-11	-0.728548	0.00720175	B1_Mm	37.28	54.46	58.78	37.98
Txndc16:chr14:45134751	0.0010912	0.02466	0.0353032	NA	FALSE	3_prime_UTR_variant	-	c.*957A>G	protein_coding	Txndc16	thioredoxin domain containing 16	-	-	ENSMUSG00000021830	2.7213e-06	4.54175e-06	0.356859	0.34581	B3	3.33333	29.9767	8.335	0
Ccnyl1:chr1:64724928	0.00112361	0.0252733	0.0059196	NA	FALSE	3_prime_UTR_variant	-	c.*1289A>G	protein_coding	Ccnyl1	cyclin Y-like 1	-	-	ENSMUSG00000070871	0.000537785	0.00063692	NA	NA	-	0.856667	0.31	0.343333	3.81333
Afdn:chr17:13905197	0.00113078	0.0253156	0.0209117	NA	FALSE	3_prime_UTR_variant	-	c.*1190A>G	protein_coding	Afdn	afadin, adherens junction formation factor	-	-	ENSMUSG00000068036	1.09884e-08	3.79233e-08	NA	NA	-	0.24	0.22	0.343333	1.84333
Ywhag:chr5:135910350	0.00117619	0.0262099	0.0833421	NA	FALSE	3_prime_UTR_variant	-	c.*645A>G	protein_coding	Ywhag	tyrosine 3-monooxygenase/tryptophan 5-monooxygenase activation protein, gamma polypeptide	-	-	ENSMUSG00000051391	6.69188e-08	1.71672e-07	NA	NA	-	0	0.426667	0	1.74333
Palm:chr10:79818869	0.00118552	0.0262955	0.111869	NA	TRUE	intron_variant	-	c.632-172A>G	protein_coding	Palm	paralemmin	-	-	ENSMUSG00000035863	7.63743e-11	6.8454e-10	-0.145786	0.668862	PB1D7	12.2	7.97667	5.38667	21.11
Ube2l6:chr2:84809493	0.00249076	0.039254	0.0011892	NA	FALSE	3_prime_UTR_variant	-	c.*337A>G	protein_coding	Ube2l6	ubiquitin-conjugating enzyme E2L 6	-	-	ENSMUSG00000027078	5.57828e-12	9.41822e-11	-0.304729	0.335508	-	0.233333	3.18333	1.96667	1.13
Phf11d:chr14:59352545	0.00121055	0.026727	0.442839	NA	FALSE	intron_variant	-	c.721+106A>G	protein_coding	Phf11d	PHD finger protein 11D	-	-	ENSMUSG00000068245	1.09632e-15	3.97964e-13	0.2	0.916667	B3	28.57	NA	NA	47.9267
Dynll1:chr5:115297616	0.00122732	0.0268656	0.6993	NA	TRUE	3_prime_UTR_variant	-	c.*1080A>G	protein_coding	Dynll1	dynein light chain LC8-type 1	-	-	ENSMUSG00000009013	1.64105e-10	1.295e-09	0.39864	0.199288	B1_Mus1	4.94	4.71	2.19	0
Sez6l:chr5:112463251	0.00122805	0.0268656	0.213053	NA	FALSE	intron_variant	-	c.1502-202A>G	protein_coding	Sez6l	seizure related 6 homolog like	-	-	ENSMUSG00000058153	1.33073e-09	6.95041e-09	0.425421	0.167973	B1F	0	4.77333	0	1.28333
Golga5:chr12:102486598	0.00124935	0.0272074	0.0664056	NA	TRUE	intron_variant	-	c.1486-522A>G	protein_coding	Golga5	golgi autoantigen, golgin subfamily a, 5	-	-	ENSMUSG00000021192	7.77618e-06	1.19862e-05	0.286771	0.421781	B1_Mur3	3.33333	16.6233	0	0
Cacng8:chr7:3415084	0.00125737	0.0272581	0.0849522	NA	TRUE	missense_variant	p.S251G	c.751A>G	protein_coding	Cacng8	calcium channel, voltage-dependent, gamma subunit 8	-	deleterious	ENSMUSG00000053395	3.61066e-08	1.02798e-07	NA	NA	-	17.3767	12.2933	16.0467	24.53
Cds2:chr2:132309636	0.00127542	0.0275249	0.272251	NA	FALSE	3_prime_UTR_variant	-	c.*4351A>G	protein_coding	Cds2	CDP-diacylglycerol synthase (phosphatidate cytidylyltransferase) 2	-	-	ENSMUSG00000058793	1.04373e-07	2.4905e-07	0	1	MIRb	2.75	3.16	5.59333	1.72
Ccz1:chr5:143993625	0.00131376	0.0279743	0.843545	NA	TRUE	intron_variant	-	c.949-366A>G	protein_coding	Ccz1	CCZ1 vacuolar protein trafficking and biogenesis associated	-	-	ENSMUSG00000029617	0.00327078	0.00363642	-0.260897	0.617534	B1_Mur4	37.5	41.9367	20	28.57
Gm29650:chrY:1048964	0.00132513	0.0280917	0.0588102	NA	FALSE	non_coding_transcript_exon_variant	-	n.572A>G	lincRNA	Gm29650	predicted gene 29650	-	-	ENSMUSG00000099876	0.000282481	0.000344096	0.109109	0.797039	Lx2B2	2.38	0	14.09	0
Prxl2c:chr13:64290310	0.00133921	0.0282651	0.00478754	NA	TRUE	3_prime_UTR_variant	-	c.*1791A>G	protein_coding	Prxl2c	AhpC/TSA antioxidant enzyme domain containing 1	-	-	ENSMUSG00000021482	3.39388e-10	2.18049e-09	0.48951	0.109632	B1F	49.0067	57.94	51.59	36.3667
Sgk1:chr10:21999132	0.00135546	0.0284824	0.0382786	NA	FALSE	3_prime_UTR_variant	-	c.*305A>G	protein_coding	Sgk1	serum/glucocorticoid regulated kinase 1	-	-	ENSMUSG00000019970	1.42077e-10	1.15896e-09	0.51049	0.0936054	-	0.893333	1.46667	1.80667	2.63667
Lin37:chr7:30556118	0.00137611	0.0287901	0.00536201	NA	TRUE	intron_variant	-	c.445-129A>G	protein_coding	Lin37	lin-37 homolog (C. elegans)	-	-	ENSMUSG00000036845	2.93199e-05	4.09351e-05	-0.251748	0.430115	B1_Mm	12.1933	13.7567	7.54	30.7533
Kif5b:chr18:6201433	0.00304596	0.0436921	0.00137761	NA	TRUE	3_prime_UTR_variant	-	c.*2293A>G	protein_coding	Kif5b	kinesin family member 5B	-	-	ENSMUSG00000006740	0.305024	0.308853	0.231353	0.469378	-	0.656667	0.326667	0.286667	2.43
Hacd3:chr9:64999118	0.00138881	0.0288055	1	NA	TRUE	intron_variant	-	c.533-796A>G	protein_coding	Hacd3	3-hydroxyacyl-CoA dehydratase 3	-	-	ENSMUSG00000033629	0.00011136	0.000141141	NA	NA	B3	NA	26.785	20	16.67
Tubb6:chr18:67402417	0.00138887	0.0288055	0.640001	NA	FALSE	3_prime_UTR_variant	-	c.*41A>G	protein_coding	Tubb6	tubulin, beta 6 class V	-	-	ENSMUSG00000001473	2.52551e-14	2.06637e-12	NA	NA	-	0	0	1.09667	1.49667
Rsrc2:chr5:123742066	0.00139745	0.0288585	0.078613	NA	TRUE	intron_variant	-	c.205-1204A>G	protein_coding	Rsrc2	arginine/serine-rich coiled-coil 2	-	-	ENSMUSG00000029422	8.51677e-05	0.000110217	0.148877	0.662197	B1_Mus2	2.08333	19.66	3.33333	12.7
Sp3:chr2:72937237	0.00140809	0.0289535	0.00322517	NA	TRUE	3_prime_UTR_variant	-	c.*829A>G	protein_coding	Sp3	trans-acting transcription factor 3	-	-	ENSMUSG00000027109	0.00292959	0.00326209	-0.45184	0.140313	-	20.85	13.6633	15.2967	22.1233
Noct:chr3:51235561	0.00145563	0.0298031	0.153298	NA	TRUE	intron_variant	-	c.184+10274A>G	protein_coding	Noct	nocturnin	-	-	ENSMUSG00000023087	9.41139e-14	5.44599e-12	-0.607143	0.166667	MTC	NA	80	88.4833	74.8033
Tpp1:chr7:105745834	0.001475	0.0299978	0.295678	NA	TRUE	3_prime_UTR_variant	-	c.*798A>G	protein_coding	Tpp1	tripeptidyl peptidase I	-	-	ENSMUSG00000030894	1.09523e-07	2.59849e-07	0.391895	0.207702	-	1.23667	4.04333	1.04	0
Pnpla6:chr8:3540659	0.00147824	0.0299978	0.275473	NA	TRUE	intron_variant	-	c.3338-632A>G	protein_coding	Pnpla6	patatin-like phospholipase domain containing 6	-	-	ENSMUSG00000004565	8.64407e-10	4.79053e-09	-0.360734	0.275768	B1_Mus2	84.8867	79.9067	83.59	100
Heatr3:chr8:88171868	0.00148848	0.0299978	0.0304763	NA	TRUE	3_prime_UTR_variant	-	c.*887A>G	protein_coding	Heatr3	HEAT repeat containing 3	-	-	ENSMUSG00000031657	0.000995279	0.00115612	0.31874	0.312602	B1_Mur3	14.2133	21.4867	26.4933	9.11
Rel:chr11:23737409	0.00152618	0.0305332	0.0904899	NA	FALSE	3_prime_UTR_variant	-	c.*4856A>G	protein_coding	Rel	reticuloendotheliosis oncogene	-	-	ENSMUSG00000020275	2.04117e-12	4.6076e-11	NA	NA	PB1	0	0	0	3.10667
Arpp19:chr9:75057530	0.00155467	0.0308235	0.0576734	NA	FALSE	3_prime_UTR_variant	-	c.*725A>G	protein_coding	Arpp19	cAMP-regulated phosphoprotein 19	-	-	ENSMUSG00000007656	2.03058e-05	2.93081e-05	-0.108172	0.737905	-	0	0.653333	2.90667	0
Pcp4l1:chr1:171173815	0.00155694	0.0308235	0.0218537	NA	FALSE	3_prime_UTR_variant	-	c.*568A>G	protein_coding	Pcp4l1	Purkinje cell protein 4-like 1	-	-	ENSMUSG00000038370	6.60078e-11	6.2236e-10	0.181818	0.572958	B1_Mur1	1.03667	1.09667	1.41333	0.373333
Rrn3:chr16:13814003	0.0015755	0.031011	0.100131	NA	TRUE	3_prime_UTR_variant	-	c.*731A>G	protein_coding	Rrn3	RRN3 RNA polymerase I transcription factor homolog (yeast)	-	-	ENSMUSG00000022682	0.00127605	0.00146584	NA	NA	B1_Mus1	2.56667	3.43667	0.52	0.573333
Gm1043:chr5:37158619	0.00158583	0.031011	0.0094811	NA	FALSE	intron_variant	-	c.285-1127A>G	protein_coding	Gm1043	predicted 1043	-	-	ENSMUSG00000117286	2.44789e-09	1.12479e-08	-0.584904	0.0587445	-	0	2.77667	1.66667	16.8
Mrpl24:chr3:87921457	0.00159913	0.031144	0.0742243	NA	TRUE	intron_variant	-	c.-49-360A>G	protein_coding	Mrpl24	mitochondrial ribosomal protein L24	-	-	ENSMUSG00000019710	3.34897e-06	5.48838e-06	-0.423819	0.169753	B1F2	2.26	7.36667	4.16333	6.32333
Tsc22d1:chr14:76507750	0.00160755	0.0311813	0.109632	NA	FALSE	3_prime_UTR_variant	-	c.*1076A>G	protein_coding	Tsc22d1	TSC22 domain family, member 1	-	-	ENSMUSG00000022010	0.000156331	0.000195346	-0.231353	0.469378	-	1.99	0.433333	0.236667	2.07667
Ebna1bp2:chr4:118626126	0.00161819	0.0312611	0.116056	NA	TRUE	3_prime_UTR_variant	-	c.*256A>G	protein_coding	Ebna1bp2	EBNA1 binding protein 2	-	-	ENSMUSG00000028729	0.000623436	0.000732466	0.447552	0.147205	B1_Mur4	50.1867	50.16	56.0833	31.9233
Zkscan3:chr13:21389933	0.00162829	0.0312699	0.0581124	NA	TRUE	intron_variant	-	c.755-1227A>G	protein_coding	Zkscan3	zinc finger with KRAB and SCAN domains 3	-	-	ENSMUSG00000021327	2.22626e-09	1.04952e-08	NA	NA	ORR1A2	3.36	9.58	11.4	0
Tef:chr15:81819284	0.00168226	0.0318709	0.0209862	NA	TRUE	intron_variant	-	c.470-1915A>G	protein_coding	Tef	thyrotroph embryonic factor	-	-	ENSMUSG00000022389	4.23974e-11	4.27508e-10	-0.266667	0.493331	B1_Mur3	63.8633	62.73	38.75	NA
Adsl:chr15:80968839	0.00170307	0.0318709	0.10857	NA	FALSE	3_prime_UTR_variant	-	c.*91A>G	protein_coding	Adsl	adenylosuccinate lyase	-	-	ENSMUSG00000022407	0.00025051	0.000305664	0.523215	0.0808795	B1_Mus2	1.99667	2.46667	0.83	0
H2-T24:chr17:36006440	0.00171406	0.0318709	0.00630232	NA	FALSE	3_prime_UTR_variant	-	c.*296A>G	protein_coding	H2-T24	histocompatibility 2, T region locus 24	-	-	ENSMUSG00000053835	1.65747e-08	5.23185e-08	NA	NA	B2_Mm1a	1.90333	4.95667	4.94	0.393333
Vamp3:chr4:151048091	0.00172286	0.0318709	0.0623533	NA	FALSE	3_prime_UTR_variant	-	c.*939A>G	protein_coding	Vamp3	vesicle-associated membrane protein 3	-	-	ENSMUSG00000028955	5.24117e-06	8.33931e-06	NA	NA	-	8.64	6.11	5.39333	8.90667
Oasl2:chr5:114909444	0.00172401	0.0318709	1	NA	FALSE	intron_variant	-	c.1051-1447A>G	protein_coding	Oasl2	2'-5' oligoadenylate synthetase-like 2	-	-	ENSMUSG00000029561	2.99326e-15	7.24368e-13	NA	NA	B1_Mus1	0	0	NA	3.63333
Nol10:chr12:17429681	0.00173442	0.0318709	0.0845726	NA	FALSE	3_prime_UTR_variant	-	c.*447A>G	protein_coding	Nol10	nucleolar protein 10	-	-	ENSMUSG00000061458	1.21544e-11	1.53963e-10	0.500012	0.097845	B1_Mus1	8.79	6.19	0	7.78333
Deptor:chr15:55255689	0.00174676	0.0318709	0.226741	NA	TRUE	3_prime_UTR_variant	-	c.*3554A>G	protein_coding	Deptor	DEP domain containing MTOR-interacting protein	-	-	ENSMUSG00000022419	0.0969192	0.100663	NA	NA	B1_Mur4	42.86	NA	0	19.1667
Kif3c:chr12:3404168	0.00175063	0.0318709	0.374594	NA	TRUE	3_prime_UTR_variant	-	c.*1283A>G	protein_coding	Kif3c	kinesin family member 3C	-	-	ENSMUSG00000020668	6.31062e-11	6.10868e-10	0.744722	0.00545789	B3A	2.38	8.02	0	0
Ptprb:chr10:116389119	0.00175126	0.0318709	0.0052729	NA	FALSE	3_prime_UTR_variant	-	c.*5244A>G	protein_coding	Ptprb	protein tyrosine phosphatase, receptor type, B	-	-	ENSMUSG00000020154	7.35772e-10	4.30783e-09	-0.48951	0.109632	-	0.473333	0.563333	0.183333	1.51667
Errfi1:chr4:150860591	0.00175457	0.0318709	0.581895	NA	TRUE	intron_variant	-	c.-73-4484A>G	protein_coding	Errfi1	ERBB receptor feedback inhibitor 1	-	-	ENSMUSG00000028967	2.7306e-13	9.6562e-12	0.8	0.333333	-	NA	NA	0	21.2733
Npdc1:chr2:25406980	0.00175619	0.0318709	0.0362307	NA	TRUE	intron_variant	-	c.260-616A>G	protein_coding	Npdc1	neural proliferation, differentiation and control 1	-	-	ENSMUSG00000015094	5.22426e-06	8.33585e-06	0.427817	0.165333	B1_Mur4,MT2B	1.53333	2.5	4.76	0
Iqgap1:chr7:80712039	0.0017845	0.0321037	0.00385281	NA	FALSE	3_prime_UTR_variant	-	c.*1793A>G	protein_coding	Iqgap1	IQ motif containing GTPase activating protein 1	-	-	ENSMUSG00000030536	6.05846e-07	1.18556e-06	NA	NA	B1_Mur2	0.75	0.253333	0.523333	1.44
Kpna4:chr3:69073109	0.0017982	0.0321037	0.00268392	NA	FALSE	3_prime_UTR_variant	-	c.*980A>G	protein_coding	Kpna4	karyopherin (importin) alpha 4	-	-	ENSMUSG00000027782	3.28758e-05	4.57238e-05	0.499072	0.0985791	-	0	0.45	0.463333	3.31
Ska2:chr11:87123482	0.0018022	0.0321037	0.146933	NA	FALSE	3_prime_UTR_variant	-	c.*1483A>G	protein_coding	Ska2	spindle and kinetochore associated complex subunit 2	-	-	ENSMUSG00000020492	9.89094e-09	3.50284e-08	-0.526848	0.0958815	B1_Mus1	1.51667	2.9	4.16667	20
Noct:chr3:51246040	0.00181624	0.0321037	0.709725	NA	FALSE	intron_variant	-	c.185-1765A>G	protein_coding	Noct	nocturnin	-	-	ENSMUSG00000023087	9.41139e-14	5.44599e-12	0.593306	0.092162	B1_Mur2,MT2B	0	0	2.66667	1.67667
Slc36a4:chr9:15741935	0.00181679	0.0321037	0.196579	NA	FALSE	3_prime_UTR_variant	-	c.*3557A>G	protein_coding	Slc36a4	solute carrier family 36 (proton/amino acid symporter), member 4	-	-	ENSMUSG00000043885	7.00084e-08	1.76286e-07	0.137636	0.669697	-	0	1.58667	0.483333	0
Plekhd1:chr12:80723736	0.00181902	0.0321037	0.00524871	NA	TRUE	3_prime_UTR_variant	-	c.*1251A>G	protein_coding	Plekhd1	pleckstrin homology domain containing, family D (with coiled-coil domains) member 1	-	-	ENSMUSG00000066438	4.5164e-05	6.07205e-05	-0.265068	0.459214	B3	6.06	6.66667	8.93	55.56
Nudt21:chr8:94017815	0.00181957	0.0321037	0.0147076	NA	TRUE	3_prime_UTR_variant	-	c.*1868A>G	protein_coding	Nudt21	nudix (nucleoside diphosphate linked moiety X)-type motif 21	-	-	ENSMUSG00000031754	0.0013651	0.00156073	0	1	B1_Mm	57.275	10	NA	16.67
Ankrd13d:chr19:4273931	0.00182263	0.0321037	0.272496	NA	FALSE	intron_variant	-	c.732-329A>G	protein_coding	Ankrd13d	ankyrin repeat domain 13 family, member D	-	-	ENSMUSG00000005986	3.3501e-09	1.41405e-08	0.615587	0.268998	B2_Mm2	0	16.25	16.67	NA
Gm29650:chrY:1049036	0.00184433	0.0322833	0.410138	NA	FALSE	non_coding_transcript_exon_variant	-	n.644A>G	lincRNA	Gm29650	predicted gene 29650	-	-	ENSMUSG00000099876	0.000282481	0.000344096	-0.450469	0.310429	Lx2B2	17.145	21.8067	NA	40
Fbxo44:chr4:148153943	0.0018594	0.0322833	0.0600555	NA	FALSE	intron_variant	-	c.625-299A>G	protein_coding	Fbxo44	F-box protein 44	-	-	ENSMUSG00000029001	1.91087e-06	3.27192e-06	0.441009	0.151269	B3	0	9.36333	2.38	0
Dact3:chr7:16885788	0.00186385	0.0322833	0.0135563	NA	TRUE	missense_variant	p.K403E	c.1207A>G	protein_coding	Dact3	dishevelled-binding antagonist of beta-catenin 3	-	deleterious	ENSMUSG00000078794	1.59001e-08	5.06294e-08	-0.33275	0.290588	-	1.39333	7.15	2.40333	10.2833
Rfc2:chr5:134591748	0.00186652	0.0322833	0.115913	NA	TRUE	intron_variant	-	c.520+529A>G	protein_coding	Rfc2	replication factor C (activator 1) 2	-	-	ENSMUSG00000023104	6.14267e-08	1.59271e-07	-0.558324	0.093464	B1_Mus2	11.6533	3.33333	10.32	40
Vcam1:chr3:116117788	0.00188951	0.0325634	0.0736739	NA	FALSE	intron_variant	-	c.1205-245A>G	protein_coding	Vcam1	vascular cell adhesion molecule 1	-	-	ENSMUSG00000027962	4.29033e-13	1.35425e-11	NA	NA	B1_Mus2	0	3.47667	7.45667	8.21333
Zc3h7a:chr16:11143702	0.00247819	0.0391849	0.00191668	NA	TRUE	intron_variant	-	c.2316+1478A>G	protein_coding	Zc3h7a	zinc finger CCCH type containing 7 A	-	-	ENSMUSG00000037965	3.067e-10	2.08097e-09	NA	NA	B1_Mus1	42.82	40.4767	51.515	12.9167
Cars:chr7:143561697	0.00196815	0.0337972	0.00354321	NA	TRUE	intron_variant	-	c.2217+162A>G	protein_coding	Cars	cysteinyl-tRNA synthetase	-	-	ENSMUSG00000010755	0.000184347	0.000229171	0.184637	0.609596	B1_Mur3	8.335	56.02	41.25	15.28
Hipk2:chr6:38818679	0.00197538	0.0338001	0.48327	NA	TRUE	synonymous_variant	p.K218=	c.654A>G	protein_coding	Hipk2	homeodomain interacting protein kinase 2	-	-	ENSMUSG00000061436	7.21742e-10	4.28892e-09	NA	NA	-	0	NA	0	13.0967
Zscan26:chr13:21443023	0.00199409	0.0339349	0.00260357	NA	TRUE	3_prime_UTR_variant	-	c.*1908A>G	protein_coding	Zscan26	zinc finger and SCAN domain containing 26	-	-	ENSMUSG00000022228	1.51499e-09	7.56893e-09	0.43509	0.15748	B1_Mus2	3.22333	6.98667	5.51333	1.28333
Crocc:chr4:141023017	0.00199999	0.0339349	0.0427582	NA	TRUE	intron_variant	-	c.4385-580A>G	protein_coding	Crocc	ciliary rootlet coiled-coil, rootletin	-	-	ENSMUSG00000040860	5.40789e-08	1.43289e-07	-0.413311	0.181721	B3	10.4367	15.9933	9.78667	28.9667
Pde5a:chr3:122856269	0.0020045	0.0339349	0.077934	NA	FALSE	3_prime_UTR_variant	-	c.*937A>G	protein_coding	Pde5a	phosphodiesterase 5A, cGMP-specific	-	-	ENSMUSG00000053965	9.70511e-07	1.80202e-06	0	1	B1_Mus2	21.8533	41.665	6.06	NA
Nrep:chr18:33437483	0.00201345	0.0339663	0.409506	NA	FALSE	3_prime_UTR_variant	-	c.*1231A>G	protein_coding	Nrep	neuronal regeneration related protein	-	-	ENSMUSG00000042834	1.81218e-11	2.13201e-10	0.57284	0.0515592	-	1.13667	1.31	0.436667	0
Ccdc84:chr9:44411206	0.002022	0.0339908	0.0053873	NA	TRUE	intron_variant	-	c.716-426A>G	protein_coding	Ccdc84	coiled-coil domain containing 84	-	-	ENSMUSG00000043923	7.26436e-06	1.12211e-05	-0.434326	0.158294	B1_Mus1	7.56	13.27	3.62667	31.0267
Vwa3a:chr7:120797854	0.0020745	0.0347516	0.0366284	NA	FALSE	intron_variant	-	c.2732-1155A>G	protein_coding	Vwa3a	von Willebrand factor A domain containing 3A	-	-	ENSMUSG00000030889	9.97876e-06	1.49991e-05	-0.0636364	0.860104	-	30.7067	5	12.4733	29.3667
Klf6:chr13:5868630	0.00312532	0.0444315	0.0021015	NA	FALSE	3_prime_UTR_variant	-	c.*1347A>G	protein_coding	Klf6	Kruppel-like factor 6	-	-	ENSMUSG00000000078	2.79311e-13	9.6562e-12	NA	NA	-	1.49	2.56333	4.72333	4.90667
Tef:chr15:81819278	0.00213524	0.0355205	0.0214577	NA	TRUE	intron_variant	-	c.470-1921A>G	protein_coding	Tef	thyrotroph embryonic factor	-	-	ENSMUSG00000022389	4.23974e-11	4.27508e-10	NA	NA	B1_Mur3	25.56	8.19667	11.7567	NA
Rab27a:chr9:73097260	0.00214768	0.0355426	0.464373	NA	FALSE	3_prime_UTR_variant	-	c.*1804A>G	protein_coding	Rab27a	RAB27A, member RAS oncogene family	-	-	ENSMUSG00000032202	2.92019e-09	1.27442e-08	0.433074	0.159633	B1_Mus1	1.51667	3.60333	5.37667	0
Csad:chr15:102177400	0.0021514	0.0355426	0.0792463	NA	FALSE	3_prime_UTR_variant	-	c.*213A>G	protein_coding	Csad	cysteine sulfinic acid decarboxylase	-	-	ENSMUSG00000023044	1.41416e-06	2.52877e-06	-0.543835	0.0675871	B1_Mur3	0.866667	0.64	0.373333	3.22667
Tmem175:chr5:108634075	0.0021677	0.0356888	0.231841	NA	FALSE	intron_variant	-	c.-110-4162A>G	protein_coding	Tmem175	transmembrane protein 175	-	-	ENSMUSG00000013495	2.65872e-08	7.87849e-08	-0.528182	0.0775272	B2_Mm1t	14.3267	12.4867	12.8267	24.1067
Oasl2:chr5:114910417	0.00220105	0.0361044	1	NA	FALSE	intron_variant	-	c.1051-474A>G	protein_coding	Oasl2	2'-5' oligoadenylate synthetase-like 2	-	-	ENSMUSG00000029561	2.99326e-15	7.24368e-13	NA	NA	B2_Mm2	0	0	0	3.41
Hjurp:chr1:88272143	0.00220801	0.0361044	0.0161347	NA	FALSE	intron_variant	-	c.256+586A>G	protein_coding	Hjurp	Holliday junction recognition protein	-	-	ENSMUSG00000044783	1.64747e-09	8.02727e-09	-0.241458	0.474435	B1_Mur1	18.57	13.16	4.92	39.285
Tatdn3:chr1:191053249	0.0022259	0.036207	0.259607	NA	TRUE	intron_variant	-	c.479-277A>G	protein_coding	Tatdn3	TatD DNase domain containing 3	-	-	ENSMUSG00000026632	1.09162e-09	5.87048e-09	0.784873	0.0122311	B1_Mus2	12.45	19.4467	0	12.5
Qpctl:chr7:19140326	0.00223602	0.036207	0.0190216	NA	TRUE	3_prime_UTR_variant	-	c.*828A>G	protein_coding	Qpctl	glutaminyl-peptide cyclotransferase-like	-	-	ENSMUSG00000030407	6.03095e-05	7.97536e-05	0.345079	0.271965	B1_Mus1	1.33333	7.69	3.11	13.44
Snrnp70:chr7:45383549	0.00223696	0.036207	0.00437152	NA	TRUE	intron_variant	-	c.475+255A>G	protein_coding	Snrnp70	small nuclear ribonucleoprotein 70 (U1)	-	-	ENSMUSG00000063511	5.60219e-05	7.44906e-05	NA	NA	-	13.3367	25.9933	1.96	3.70333
Dnajc18:chr18:35672801	0.00225428	0.0363645	0.230945	NA	TRUE	3_prime_UTR_variant	-	c.*2318A>G	protein_coding	Dnajc18	DnaJ heat shock protein family (Hsp40) member C18	-	-	ENSMUSG00000024350	1.73228e-06	3.0159e-06	NA	NA	B1_Mur4	16.9567	11.32	6.09333	0
Nt5dc3:chr10:86837267	0.00229457	0.0368851	0.00823342	NA	TRUE	3_prime_UTR_variant	-	c.*3084A>G	protein_coding	Nt5dc3	5'-nucleotidase domain containing 3	-	-	ENSMUSG00000054027	0.0107989	0.0115634	0.218315	0.49545	B1_Mur1	11.9967	17.56	1.19	5.75333
Fam32a:chr8:72223815	0.00230195	0.0368851	0.00395646	NA	TRUE	3_prime_UTR_variant	-	c.*1565A>G	protein_coding	Fam32a	family with sequence similarity 32, member A	-	-	ENSMUSG00000003039	1.52385e-10	1.22924e-09	-0.125874	0.699712	B1_Mus2	11.2567	12.9	28.2833	6.79333
Trp53inp1:chr4:11171319	0.00231879	0.0370311	0.145818	NA	FALSE	3_prime_UTR_variant	-	c.*1360A>G	protein_coding	Trp53inp1	transformation related protein 53 inducible nuclear protein 1	-	-	ENSMUSG00000028211	3.12908e-10	2.09337e-09	0.495095	0.101724	-	0	0.776667	0	2.21667
Dda1:chr8:71474918	0.00234162	0.0372715	0.0625536	NA	FALSE	3_prime_UTR_variant	-	c.*320A>G	protein_coding	Dda1	DET1 and DDB1 associated 1	-	-	ENSMUSG00000074247	3.62647e-06	5.90317e-06	NA	NA	-	0	1.54333	0.443333	0
Gm49325:chr10:77615196	0.00246203	0.0390582	0.153586	NA	TRUE	intron_variant	-	c.222+1145A>G	nonsense_mediated_decay	Gm49325	predicted gene, 49325	-	-	ENSMUSG00000112241	0.281402	0.285332	-0.485363	0.185351	B1_Mur4	2.56333	11.905	20	13.89
Flnb:chr14:7937179	0.00356993	0.048315	0.00248316	NA	TRUE	intron_variant	-	c.6888+1130A>G	protein_coding	Flnb	filamin, beta	-	-	ENSMUSG00000025278	7.50376e-12	1.11178e-10	-0.791595	0.0021561	-	13.2867	12.2867	3.47333	3.47
Mapk1:chr16:17043195	0.0025213	0.0395474	0.28557	NA	FALSE	intron_variant	-	c.*10-491A>G	protein_coding	Mapk1	mitogen-activated protein kinase 1	-	-	ENSMUSG00000063358	5.60101e-05	7.44906e-05	0.428571	0.419444	B1_Mus1	13.89	26.665	50	12.5
Plcd3:chr11:103075324	0.00252588	0.0395474	0.329664	NA	TRUE	intron_variant	-	c.1402-321A>G	protein_coding	Plcd3	phospholipase C, delta 3	-	-	ENSMUSG00000020937	2.6871e-08	7.89812e-08	-0.176293	0.626123	PB1D9	16.19	10.8633	13.9933	40
Il1rapl1:chrX:87486726	0.00254134	0.0396599	0.0257216	NA	FALSE	intron_variant	-	c.83-67424A>G	protein_coding	Il1rapl1	interleukin 1 receptor accessory protein-like 1	-	-	ENSMUSG00000052372	0.00184395	0.00208847	0.630656	0.128888	B1_Mus2	NA	41.665	21.59	5.55667
Nek4:chr14:30988146	0.00256775	0.0399418	0.168518	NA	FALSE	3_prime_UTR_variant	-	c.*942A>G	protein_coding	Nek4	NIMA (never in mitosis gene a)-related expressed kinase 4	-	-	ENSMUSG00000021918	2.26916e-08	6.89293e-08	0.412909	0.182189	B2_Mm2	3.96333	0	1.28333	0
Gas8:chr8:123535229	0.00260377	0.0402428	0.0378176	NA	FALSE	intron_variant	-	c.1288-1144A>G	protein_coding	Gas8	growth arrest specific 8	-	-	ENSMUSG00000040220	4.13202e-08	1.15729e-07	NA	NA	B1_Mur1,B4A	4.92667	11.8733	1.45	0
Naxd:chr8:11508744	0.0026039	0.0402428	0.111289	NA	TRUE	intron_variant	-	c.550-578A>G	protein_coding	Naxd	NAD(P)HX dehydratase	-	-	ENSMUSG00000031505	7.21833e-07	1.38272e-06	0.500834	0.116599	MTA_Mm	16.67	4.60333	0	7.145
Spag9:chr11:94123674	0.00264479	0.0406128	0.0191044	NA	FALSE	3_prime_UTR_variant	-	c.*837A>G	protein_coding	Spag9	sperm associated antigen 9	-	-	ENSMUSG00000020859	2.96933e-06	4.91055e-06	NA	NA	-	3.58667	2.53667	1.47333	6.31
Fastk:chr5:24444824	0.00269842	0.041304	0.202943	NA	TRUE	intron_variant	-	c.82+242A>G	protein_coding	Fastk	Fas-activated serine/threonine kinase	-	-	ENSMUSG00000028959	3.33473e-08	9.64548e-08	-0.454545	0.140413	MIRb	12.6033	14.9567	10.3733	20.6033
Scamp2:chr9:57586419	0.00272475	0.0414237	0.181302	NA	TRUE	intron_variant	-	c.735-661A>G	protein_coding	Scamp2	secretory carrier membrane protein 2	-	-	ENSMUSG00000040188	0.00102083	0.0011839	0.347312	0.399264	B2_Mm1t	15.95	22.62	3.33333	NA
Polr3f:chr2:144540438	0.0027282	0.0414237	0.00326714	NA	TRUE	3_prime_UTR_variant	-	c.*1749A>G	protein_coding	Polr3f	polymerase (RNA) III (DNA directed) polypeptide F	-	-	ENSMUSG00000027427	2.17248e-05	3.11088e-05	0.0140352	0.965469	PB1D9	13.2167	31.5867	7.22333	27.85
Spag9:chr11:94123672	0.00273218	0.0414237	0.00948979	NA	FALSE	3_prime_UTR_variant	-	c.*835A>G	protein_coding	Spag9	sperm associated antigen 9	-	-	ENSMUSG00000020859	2.96933e-06	4.91055e-06	0.46585	0.126919	-	2.81	2.12	3.91	7.45667
Plin3:chr17:56279604	0.00275517	0.0416404	0.21338	NA	TRUE	3_prime_UTR_variant	-	c.*128A>G	protein_coding	Plin3	perilipin 3	-	-	ENSMUSG00000024197	3.60121e-09	1.4855e-08	0.00416046	0.989762	-	0.68	0	1.93333	0
Icam1:chr9:21017186	0.00277324	0.0417817	0.0436577	NA	FALSE	intron_variant	-	c.67+1085A>G	protein_coding	Icam1	intercellular adhesion molecule 1	-	-	ENSMUSG00000037405	5.49325e-12	9.41822e-11	NA	NA	B1_Mur3	NA	NA	0	13.81
Ccnyl1:chr1:64724897	0.0027864	0.0418485	0.0626387	NA	FALSE	3_prime_UTR_variant	-	c.*1258A>G	protein_coding	Ccnyl1	cyclin Y-like 1	-	-	ENSMUSG00000070871	0.000537785	0.00063692	0.237146	0.458003	-	0.346667	0	1.48667	0
Acsl4:chrX:142387519	0.00280187	0.0419493	0.0491385	NA	FALSE	intron_variant	-	c.-230+2786A>G	protein_coding	Acsl4	acyl-CoA synthetase long-chain family member 4	-	-	ENSMUSG00000031278	1.91105e-05	2.77484e-05	NA	NA	B1_Mus1	21.11	28.1767	50	8.46667
Eif2d:chr1:131166066	0.0028128	0.0419609	0.397097	NA	TRUE	intron_variant	-	c.1254-261A>G	protein_coding	Eif2d	eukaryotic translation initiation factor 2D	-	-	ENSMUSG00000026427	1.8487e-06	3.19562e-06	-0.491029	0.216606	B1_Mus2	31.11	27.3467	50	60
Cfap300:chr9:8022079	0.00282016	0.0419609	0.0328443	NA	TRUE	3_prime_UTR_variant	-	c.*337A>G	protein_coding	Cfap300	cilia and flagella associated protein 300	-	-	ENSMUSG00000053070	0.477389	0.480699	0.239443	0.45353	ID_B1	7.85667	5.77	5.39667	21.74
Zfp799:chr17:32819218	0.00283461	0.0420452	0.0629683	NA	TRUE	3_prime_UTR_variant	-	c.*126A>G	protein_coding	Zfp799	zinc finger protein 799	-	-	ENSMUSG00000095253	2.49399e-06	4.1816e-06	0.206688	0.566695	B1_Mur1,MT2B	27.7767	48.4833	16.3633	14.29
Slc35e2:chr4:155621903	0.00286554	0.0421541	0.454197	NA	TRUE	3_prime_UTR_variant	-	c.*3154A>G	protein_coding	Slc35e2	solute carrier family 35, member E2	-	-	ENSMUSG00000042202	7.17675e-08	1.79049e-07	NA	NA	B1_Mur3	34.2633	33.2667	29.05	18.6767
Ykt6:chr11:5967429	0.00287192	0.0421541	0.00452286	NA	TRUE	3_prime_UTR_variant	-	c.*1385A>G	protein_coding	Ykt6	YKT6 v-SNARE homolog (S. cerevisiae)	-	-	ENSMUSG00000002741	9.55504e-05	0.00012235	0.608392	0.040002	-	9.43667	4.46333	4.23333	7.89
Rasal2:chr1:157138062	0.00287291	0.0421541	0.184305	NA	TRUE	3_prime_UTR_variant	-	c.*2649A>G	protein_coding	Rasal2	RAS protein activator like 2	-	-	ENSMUSG00000070565	1.80156e-07	4.01207e-07	0.19495	0.543735	ID_B1	1.29	2.43333	0	0
Map1lc3b:chr8:121595299	0.00290441	0.0424239	0.110565	NA	FALSE	intron_variant	-	c.97-687A>G	protein_coding	Map1lc3b	microtubule-associated protein 1 light chain 3 beta	-	-	ENSMUSG00000031812	1.40129e-06	2.51195e-06	0.15596	0.62837	B2_Mm2	0	8.93	10.0667	0
Icam1:chr9:21019509	0.00296536	0.0431825	0.0551588	NA	TRUE	intron_variant	-	c.328+330A>G	protein_coding	Icam1	intercellular adhesion molecule 1	-	-	ENSMUSG00000037405	5.49325e-12	9.41822e-11	NA	NA	B1_Mus2	NA	0	8.85667	22.9633
Iqcb1:chr16:36846488	0.00298876	0.0433913	0.0840423	NA	TRUE	intron_variant	-	c.588-993A>G	protein_coding	Iqcb1	IQ calmodulin-binding motif containing 1	-	-	ENSMUSG00000022837	0.000434425	0.000517885	NA	NA	MT2B	29.165	53.3333	43.98	19.4433
Gm9817:chr13:45079122	0.00301377	0.0436222	0.00747311	NA	FALSE	non_coding_transcript_exon_variant	-	n.431A>G	TEC	Gm9817	predicted gene 9817	-	-	ENSMUSG00000047061	0.000109125	0.000138747	-0.208898	0.562459	-	70	77.35	97.62	94.4433
Clu:chr14:65981396	0.003025	0.043653	0.00720974	NA	FALSE	3_prime_UTR_variant	-	c.*79A>G	protein_coding	Clu	clusterin	-	-	ENSMUSG00000022037	0.000699704	0.000819331	0.0700526	0.828728	-	1.24	1.13333	0.83	0.633333
Pkm:chr9:59676369	0.00304488	0.0436921	0.118494	NA	FALSE	intron_variant	-	c.1307+635A>G	protein_coding	Pkm	pyruvate kinase, muscle	-	-	ENSMUSG00000032294	0.000207136	0.000255316	0.582464	0.04689	B3	3.49667	1.07667	0	0
Tasor:chr14:27483446	0.00311635	0.0444315	0.323868	NA	TRUE	3_prime_UTR_variant	-	c.*2749A>G	protein_coding	Tasor	family with sequence similarity 208, member A	-	-	ENSMUSG00000040651	2.84646e-05	3.98944e-05	0.195804	0.542874	B1_Mus1	3.20667	3.45	5.99333	2.31333
Tpgs1:chr10:79674601	0.00314835	0.0446265	0.160794	NA	TRUE	intron_variant	-	c.375-799A>G	protein_coding	Tpgs1	tubulin polyglutamylase complex subunit 1	-	-	ENSMUSG00000020308	5.98902e-07	1.17514e-06	0.0550482	0.879946	B1_Mur3	50.7067	60.94	20	36.665
Il15:chr8:82336743	0.0031882	0.0449255	1	NA	FALSE	intron_variant	-	c.240+823A>G	protein_coding	Il15	interleukin 15	-	-	ENSMUSG00000031712	1.28975e-12	3.22883e-11	NA	NA	MTE2a	NA	0	NA	10.97
Ube2q2:chr9:55149421	0.00323816	0.0453627	0.049611	NA	FALSE	5_prime_UTR_variant	-	c.-214A>G	protein_coding	Ube2q2	ubiquitin-conjugating enzyme E2Q family member 2	-	-	ENSMUSG00000032307	3.53523e-05	4.88956e-05	0.0596432	0.861713	(CTCG)n	0	9.57667	2.5	2.38
Rab2a:chr4:8597225	0.00336057	0.0466606	0.0032559	NA	FALSE	intron_variant	-	c.475-7149A>G	protein_coding	Rab2a	RAB2A, member RAS oncogene family	-	-	ENSMUSG00000047187	6.8145e-05	8.97881e-05	-0.543835	0.0675871	B1_Mus2	0	10.4367	5.34	25.58
Gfod1:chr13:43196380	0.00328994	0.0459537	0.00810201	NA	TRUE	3_prime_UTR_variant	-	c.*3945A>G	protein_coding	Gfod1	glucose-fructose oxidoreductase domain containing 1	-	-	ENSMUSG00000051335	0.000623504	0.000732466	NA	NA	-	1.90333	3.61667	2.3	12.22
Herc4:chr10:63305680	0.00337015	0.0466606	0.193824	NA	TRUE	intron_variant	-	c.1927-668A>G	protein_coding	Herc4	hect domain and RLD 4	-	-	ENSMUSG00000020064	4.10972e-07	8.40466e-07	-0.67783	0.0448093	B1_Mur2	29.7167	13.0967	8.89	NA
Dusp11:chr6:85944850	0.00337729	0.0466606	0.0112796	NA	TRUE	3_prime_UTR_variant	-	c.*2755A>G	protein_coding	Dusp11	dual specificity phosphatase 11 (RNA/RNP complex 1-interacting)	-	-	ENSMUSG00000030002	2.15458e-07	4.65543e-07	-0.140849	0.662387	-	1.43	1.64333	0	2.44
Pank3:chr11:35787877	0.00342616	0.0469584	0.0239979	NA	TRUE	3_prime_UTR_variant	-	c.*2419A>G	protein_coding	Pank3	pantothenate kinase 3	-	-	ENSMUSG00000018846	0.0100087	0.010749	-0.0105079	0.974145	B1_Mur1	6.15333	12.87	5.25333	20.16
Fadd:chr7:144579673	0.00342642	0.0469584	0.144585	NA	FALSE	3_prime_UTR_variant	-	c.*856A>G	protein_coding	Fadd	Fas (TNFRSF6)-associated via death domain	-	-	ENSMUSG00000031077	4.2373e-05	5.73933e-05	0.714286	0.0880952	B1_Mur2	66.76	48.57	42.86	16.67
Sppl2a:chr2:126891488	0.00346793	0.0471079	0.0606123	NA	TRUE	3_prime_UTR_variant	-	c.*2724A>G	protein_coding	Sppl2a	signal peptide peptidase like 2A	rs864309241	-	ENSMUSG00000027366	2.88931e-12	6.16954e-11	-0.854642	0.000398308	B1_Mus2	44.04	48.5067	55.2567	42.6333
Malt1:chr18:65478482	0.0034709	0.0471079	0.261387	NA	FALSE	3_prime_UTR_variant	-	c.*2057A>G	protein_coding	Malt1	MALT1 paracaspase	-	-	ENSMUSG00000032688	5.42123e-07	1.07614e-06	-0.704243	0.0105672	B2_Mm2	0.563333	3.37333	3.64	1.51667
Icam1:chr9:21020583	0.00361798	0.0487306	0.822328	NA	TRUE	intron_variant	-	c.328+1404A>G	protein_coding	Icam1	intercellular adhesion molecule 1	-	-	ENSMUSG00000037405	5.49325e-12	9.41822e-11	NA	NA	B1_Mur1	0	0	1.08667	1.41667
Tor1aip1:chr1:156005064	0.00362098	0.0487306	0.0397321	NA	TRUE	3_prime_UTR_variant	-	c.*1861A>G	protein_coding	Tor1aip1	torsin A interacting protein 1	-	-	ENSMUSG00000026466	1.16849e-10	9.75082e-10	NA	NA	-	2.04667	1.50333	0.863333	3.2
Mrtfa:chr15:81012667	0.00363309	0.0487567	0.00433932	NA	FALSE	3_prime_UTR_variant	-	c.*618A>G	protein_coding	Mrtfa	MKL (megakaryoblastic leukemia)/myocardin-like 1	-	-	ENSMUSG00000042292	0.00244845	0.00274741	-0.303714	0.337202	-	1.89667	0.286667	0	0
Cdkn1b:chr6:134925137	0.00370408	0.0495706	0.0105785	NA	FALSE	3_prime_UTR_variant	-	c.*3063A>G	protein_coding	Cdkn1b	cyclin-dependent kinase inhibitor 1B	-	-	ENSMUSG00000003031	2.51946e-08	7.55837e-08	0.46788	0.125051	-	1.50667	2.28667	0	0
Atl3:chr19:7535245	0.00372893	0.0496692	0.212107	NA	TRUE	3_prime_UTR_variant	-	c.*1209A>G	protein_coding	Atl3	atlastin GTPase 3	-	-	ENSMUSG00000024759	3.53229e-08	1.00962e-07	-0.06655	0.837188	B1F2	15.5667	7.6	8.25333	15.28
Tra2a:chr6:49258630	0.00374256	0.0496692	0.138192	NA	TRUE	intron_variant	-	c.36+5208A>G	protein_coding	Tra2a	transformer 2 alpha	-	-	ENSMUSG00000029817	4.92873e-10	3.03242e-09	0.00355928	0.991241	B1_Mur3	4.32333	11.48	2.08333	3.07
Klc1:chr12:111798162	0.00377578	0.0499718	0.0287209	NA	TRUE	intron_variant	-	c.1781+2484A>G	protein_coding	Klc1	kinesin light chain 1	-	-	ENSMUSG00000021288	4.43156e-08	1.21868e-07	NA	NA	B1_Mm	5.55667	0	20	20
