# Supplementary material for: Dynamic A-to-I RNA editing during acute neuroinflammation in sepsis-associated encephalopathy
Source: Front Neurosci. 2024 Aug 2;18:1435185. doi: 10.3389/fnins.2024.1435185 (PMC11328407; doi:10.3389/fnins.2024.1435185)
Supplement: Supplementary file 9 [file Table_3.XLSX]

## Sheet: DE_optimized_genes
Table S3. Differential edited genes in CECs during acute neuroinflammation in SAE.
Gene
Icam1
Qk
Rusc2
Heg1
Wwp2
Slfn5
Rhoa
Vamp3
Ucp2
Ado
Myo1e
Lactb2
Agps
Zc3h7a
Arhgap31
Tipin
Cdc42ep4
Nip7
Vangl2
Dgkz
Tmem252
Cilk1
Tmem238
Znfx1
AU022252
R3hcc1l
Rapgef3
Sgpp1
Amotl2
Apold1
Rnf11
Tmem127
Arid5b
Flnb
Ankrd28
Cnpy2
Zcchc17
Nfia
Zswim1
Eif4g2
Calcrl
Fam219a
Wwtr1
Ubxn2b
Sp100
Stim2
Sec22b
Tomm6
Prkab1
Bnip3l
Sod2
Akap12
Rbm15b
Dnajc18
H3f3a
Smad3
Arfrp1
Tmem168
Lman1
Dhx36
Map4k2
Pcdh1
Azin1
Cttnbp2nl
Laptm4a
Rchy1
Gclm
Ikbip
Ablim1
Vat1
Ncl
Acbd3
Luzp1
Hip1
Spns2
Canx
Dtx3l
Apbb2
Gm2a
Aftph
Agfg2
Dnajb6
Pcnp
Ppfia1
Slc6a6
Ovca2
Tpd52l2
Rab6a
Isoc1
Ppp6c
Sertad1
Atxn1
Limd2
Hinfp
AW112010
Gm29609
Wdr37
Ppp2r5b
Snapc1l
Ndufaf8
Fbxw2
Ifrd1
Tmtc1
Acvrl1
Abhd2
Cxcl10
Mapk7
Susd6
Kif2a
Rab3d
Ndufv1
Psmd7
Ifnar1
Itprid2
Pwwp2a
Ift22
Ubb-ps
Map1s
Mlh3
Mydgf
Caskin2
Lrrc58
Grb10
Atpif1
Prxl2c
Itga1
Lurap1
Trnau1ap
Ppp1cb
Gm21985
Rnf125
Qpctl
Pnkd
Lzts1
Ube2d2a
Gtf3c3
Cdk13
Pja2
Brix1
Cyfip2
Cript
Sppl2a
Lrrc8b
Casp9
Smad5
Slc44a1
Sik1
Itm2a
Arih1
Ebna1bp2
Gpd1l
Dlat
Atox1
Mrpl51
Fmo2
Oga
St13
Spcs3
Cmpk2
Desi1
C2cd2
Ppp1r16b
Lipc
Glmp
Iqgap1
Ntan1
Gpr89
Arih2
Tmem243
Igtp
Taf9b
Plec
Rcan3
Slc7a1
Eapp
Nras
Rara
Dnajc1
Lrrc57
Tgfa
Zmat5
U2surp
Habp4
Alkbh6
S100pbp
Akt1
Patl2
Tspan9
Cul1
Rbbp4
Tecr
Tspan14
Pqlc3
Sbno2
Slc30a4
Arsb
Ccdc97
Cds2
Cnot6l
Slc35e2
Khdc4
Gm20696
Ece1
Fkbp15
Bpgm
Hsbp1
Arhgap29
Cxcl12
Kif5b
Pxdc1
Leprot
Cbfb
Tacc2
Trim12a
Ccni
Atxn7l3b
Zfp46
Arl5a
Cpd
Mapk1ip1l
Pecam1
Zdhhc17
Gch1
Wasl
Dcaf10
Phc2
Cpne3
Xpnpep3
Zbtb6
Akap1
Agfg1
Dffa
Parg
Lmna
Rbm41
Car5b
Aig1
Scamp2
Zfp933
4930453N24Rik
Lrrc32
Smu1
Ggps1
Kansl3
Ndufs1
Cdkal1
Nckap1
Tmem234
Tspan2
Ggcx
Fis1
Myadm
Lemd2
Sdf4
Cnppd1
Ndufb7
Lin37
Cbx3
Stom
Rasal2
Itprip
Clic4
Dctn5
Atxn3
Rbpms
H2-T24
Golt1b
Pin1
Ndufa7
Ppp1r15b
Aqp11
Pan3
Hmgcs2
Malt1
Gpx1
Mxd4
Cog4
Stat6
Acox1
Proser2
Pmpca
Surf1
Cavin1
Tmem41b
Foxq1
Lamtor3
Mknk2
Bicd2
Abr
Thsd1
Lef1
Mfap1a
Hnrnpc
Tor2a
Got2
Atf2
Ecm2
Fam181b
Polr3f
9330111N05Rik
Marchf2
Abtb1
Stard8
Hipk1
Gnb4
Dclre1b
Zc3h4
Tead2
Ssh1
Mcc
Ahcyl1
Ulk2
Ccnd2
Arf3
Pdrg1
Dnase2a
Sypl
Nf2
Pkn3
