# Supplementary material for: Dynamic A-to-I RNA editing during acute neuroinflammation in sepsis-associated encephalopathy
Source: Front Neurosci. 2024 Aug 2;18:1435185. doi: 10.3389/fnins.2024.1435185 (PMC11328407; doi:10.3389/fnins.2024.1435185)
Supplement: Supplementary file 10 [file Table_4.XLSX]

## Sheet: DE_optimized_sites
Table S4. Differential A-to-I RNA editing events in CECs during acute neuroinflammation in SAE.
event_id	p.GLM	p.GLM.adj	p.fisher	p.fisher.adj	known_site	Consequence	AAchange	NTchange	BIOTYPE	SYMBOL	description	Existing_variation	SIFT	ensembl_gene_id	p.Gene.GLM	p.Gene.GLM.adj	r.spearman	p.spearman	Repeat	PBS	LPS_30_minutes	LPS_1_hours	LPS_2_hours
Icam1:chr9:21019446	0.00387003	0.0884195	8.56251e-26	3.24947e-23	FALSE	intron_variant	-	c.328+267A>G	protein_coding	Icam1	intercellular adhesion molecule 1	-	-	ENSMUSG00000037405	3.97506e-09	4.18943e-07	0.154898	0.64928	B1_Mus2	43.335	1.75333	4.04	24.3067
Qk:chr17:10213732	0.00276982	0.0729017	1.58313e-14	4.00531e-12	TRUE	intron_variant	-	c.935-299A>G	protein_coding	Qk	quaking	-	-	ENSMUSG00000062078	0.0607872	0.0857699	0.450715	0.141425	-	2.39	0.143333	5.55333	10.8167
Rusc2:chr4:43415083	7.06929e-13	4.65159e-09	NA	NA	FALSE	missense_variant	p.T130A	c.388A>G	protein_coding	Rusc2	RUN and SH3 domain containing 2	-	tolerated	ENSMUSG00000035969	0.000578862	0.00185428	0.0966706	0.765039	-	0	0	1.88667	0
Heg1:chr16:33722395	5.53565e-12	1.82123e-08	NA	NA	FALSE	intron_variant	-	c.1528+1393A>G	protein_coding	Heg1	heart development protein with EGF-like domains 1	-	-	ENSMUSG00000075254	0.622629	0.657024	0.156042	0.628187	B3	4.2	0	0	0
Wwp2:chr8:107558171	0.0189252	0.228072	4.0233e-11	6.81974e-09	FALSE	3_prime_UTR_variant	-	c.*1185A>G	protein_coding	Wwp2	WW domain containing E3 ubiquitin protein ligase 2	-	-	ENSMUSG00000031930	0.0499143	0.0727714	-0.229474	0.473097	-	0.536667	0	0	16.2133
Slfn5:chr11:82963456	0.0220412	0.2454	4.89561e-11	6.81974e-09	TRUE	3_prime_UTR_variant	-	c.*1752A>G	protein_coding	Slfn5	schlafen 5	-	-	ENSMUSG00000054404	0.000180387	0.000776809	-0.692308	0.0158777	B1_Mur4	22.9067	32.3067	18.4633	15.47
Rhoa:chr9:108337339	0.00776177	0.134756	5.3911e-11	6.81974e-09	FALSE	3_prime_UTR_variant	-	c.*518A>G	protein_coding	Rhoa	ras homolog family member A	-	-	ENSMUSG00000007815	0.054749	0.0788937	-0.388792	0.211643	-	1.66667	2.71667	2.33	4.13333
Vamp3:chr4:151048091	0.00285949	0.0743694	8.49442e-11	9.21038e-09	FALSE	3_prime_UTR_variant	-	c.*939A>G	protein_coding	Vamp3	vesicle-associated membrane protein 3	-	-	ENSMUSG00000028955	0.0211927	0.0354003	0.237762	0.457102	-	10.4533	11.8267	14.4267	16.8467
Ucp2:chr7:100498817	0.0176889	0.219694	9.79218e-11	9.29033e-09	TRUE	missense_variant	p.K239R	c.716A>G	protein_coding	Ucp2	uncoupling protein 2 (mitochondrial, proton carrier)	-	deleterious	ENSMUSG00000033685	0.0149149	0.0265966	-0.587413	0.0488449	-	2.59333	2.42333	2.77333	1.33
Ado:chr10:67546407	1.98159e-10	4.34629e-07	NA	NA	FALSE	3_prime_UTR_variant	-	c.*1596A>G	protein_coding	Ado	2-aminoethanethiol (cysteamine) dioxygenase	-	-	ENSMUSG00000057134	1.1816e-06	1.79651e-05	-0.519003	0.124239	-	0.98	0.756667	2.73667	50
Myo1e:chr9:70383954	0.0018507	0.0569047	4.36351e-10	3.01082e-08	TRUE	missense_variant	p.Q1009R	c.3026A>G	protein_coding	Myo1e	myosin IE	-	tolerated	ENSMUSG00000032220	0.0721512	0.099912	0.013986	0.973694	-	1.98667	10.3067	3.25	2.39333
Lactb2:chr1:13625741	1.57232e-09	2.58647e-06	NA	NA	TRUE	3_prime_UTR_variant	-	c.*1120A>G	protein_coding	Lactb2	lactamase, beta 2	-	-	ENSMUSG00000025937	0.0574643	0.0820132	-0.260155	0.439762	B3	90.2933	100	100	100
Agps:chr2:75928341	0.00393444	0.0884669	2.08646e-09	1.31969e-07	TRUE	3_prime_UTR_variant	-	c.*2298A>G	protein_coding	Agps	alkylglycerone phosphate synthase	-	-	ENSMUSG00000042410	0.0842299	0.11451	-0.286713	0.366408	-	11.3767	40.8067	17.7733	7.80667
Zc3h7a:chr16:11173112	2.45174e-09	3.22649e-06	NA	NA	FALSE	intron_variant	-	c.-35+3108A>G	protein_coding	Zc3h7a	zinc finger CCCH type containing 7 A	-	-	ENSMUSG00000037965	0.0898458	0.121479	0.782217	0.0127322	B1_Mur4	25	0	0	4.74
Arhgap31:chr16:38599821	0.0324978	0.293045	3.11941e-09	1.82126e-07	FALSE	3_prime_UTR_variant	-	c.*1604A>G	protein_coding	Arhgap31	Rho GTPase activating protein 31	-	-	ENSMUSG00000022799	0.523936	0.562438	-0.143608	0.656129	-	0.776667	1.11	1.12667	6.57333
Tipin:chr9:64281608	9.08726e-09	9.9657e-06	NA	NA	FALSE	5_prime_UTR_variant	-	c.-45A>G	protein_coding	Tipin	timeless interacting protein	-	-	ENSMUSG00000032397	2.32755e-06	3.21116e-05	0.115624	0.734959	-	0	0	8.49	0
Cdc42ep4:chr11:113727861	0.00259405	0.0691048	3.08888e-08	1.39902e-06	FALSE	3_prime_UTR_variant	-	c.*653A>G	protein_coding	Cdc42ep4	CDC42 effector protein (Rho GTPase binding) 4	-	-	ENSMUSG00000041598	2.15727e-08	1.60716e-06	0.454545	0.140413	-	4.17	8.47667	3.74	5.66333
Icam1:chr9:21020602	0.00156995	0.0521731	3.1335e-08	1.39902e-06	TRUE	intron_variant	-	c.328+1423A>G	protein_coding	Icam1	intercellular adhesion molecule 1	-	-	ENSMUSG00000037405	3.97506e-09	4.18943e-07	0.428571	0.353571	B1_Mur1	NA	50	25.8633	55.78
Nip7:chr8:107059420	3.83396e-08	3.37553e-05	NA	NA	FALSE	3_prime_UTR_variant	-	c.*924A>G	protein_coding	Nip7	NIP7, nucleolar pre-rRNA processing protein	-	-	ENSMUSG00000031917	1.30408e-05	0.000106763	-0.840668	0.0360576	MT2B,B1_Mur1	10.17	0	16.025	NA
Vangl2:chr1:172003154	4.43939e-08	3.37553e-05	NA	NA	FALSE	3_prime_UTR_variant	-	c.*1448A>G	protein_coding	Vangl2	VANGL planar cell polarity 2	-	-	ENSMUSG00000026556	8.85102e-05	0.000474389	0.216344	0.499448	-	0.723333	0	6.36	0
Dgkz:chr2:91937474	4.61698e-08	3.37553e-05	NA	NA	FALSE	missense_variant	p.K819R	c.2456A>G	protein_coding	Dgkz	diacylglycerol kinase zeta	-	deleterious	ENSMUSG00000040479	7.0823e-05	0.000412212	0.651705	0.0216665	-	1.57	0	0	0
Tmem252:chr19:24679154	8.58519e-08	5.27664e-05	NA	NA	FALSE	3_prime_UTR_variant	-	c.*1342A>G	protein_coding	Tmem252	transmembrane protein 252	-	-	ENSMUSG00000048572	3.98872e-09	4.18943e-07	0.794648	0.00201382	-	0	0	0.27	2.22667
Cilk1:chr9:78168213	8.82113e-08	5.27664e-05	NA	NA	FALSE	3_prime_UTR_variant	-	c.*459A>G	protein_coding	Cilk1	intestinal cell kinase	-	-	ENSMUSG00000009828	0.0365107	0.0551733	0.277241	0.470145	-	0	0	17.49	NA
Tmem238:chr7:4789026	1.57588e-07	8.20673e-05	NA	NA	FALSE	missense_variant	p.T173A	c.517A>G	protein_coding	Tmem238	transmembrane protein 238	-	tolerated_low_confidence	ENSMUSG00000030431	0.0226299	0.0374545	0.328445	0.297257	-	0	1.07667	1.03667	0
Znfx1:chr2:167046384	1.62139e-07	8.20673e-05	NA	NA	FALSE	intron_variant	-	c.2395+508A>G	protein_coding	Znfx1	zinc finger, NFX1-type containing 1	-	-	ENSMUSG00000039501	0.000268108	0.00104031	0.20292	0.699798	B1_Mm	0	100	0	13.41
AU022252:chr4:119222807	0.00332777	0.0814005	1.81421e-07	6.25904e-06	FALSE	3_prime_UTR_variant	-	c.*3535A>G	protein_coding	AU022252	expressed sequence AU022252	-	-	ENSMUSG00000078584	8.8174e-05	0.000474389	0.153937	0.632888	B3A	0	8	29.84	0
R3hcc1l:chr19:42520849	1.98871e-07	9.34694e-05	NA	NA	FALSE	intron_variant	-	c.-15+1992A>G	protein_coding	R3hcc1l	R3H domain and coiled-coil containing 1 like	-	-	ENSMUSG00000025184	0.341717	0.382826	0.400379	0.285607	B1_Mur1	6.40667	100	8.93	0
Rapgef3:chr15:97757225	0.0184342	0.226348	2.55499e-07	8.43147e-06	FALSE	missense_variant	p.S507G	c.1519A>G	protein_coding	Rapgef3	Rap guanine nucleotide exchange factor (GEF) 3	-	tolerated	ENSMUSG00000022469	6.30725e-07	1.35636e-05	-0.280211	0.377698	-	0.916667	3.06333	0.273333	0.133333
Sgpp1:chr12:75735299	3.02965e-07	0.000132901	NA	NA	FALSE	missense_variant	p.T89A	c.265A>G	protein_coding	Sgpp1	sphingosine-1-phosphate phosphatase 1	-	tolerated	ENSMUSG00000021054	9.5534e-05	0.000508377	0.195542	0.542489	GC_rich	0.653333	7.60333	0	0
Amotl2:chr9:102731873	0.0042362	0.0926054	3.76355e-07	1.09867e-05	FALSE	3_prime_UTR_variant	-	c.*167A>G	protein_coding	Amotl2	angiomotin-like 2	-	-	ENSMUSG00000032531	0.458052	0.494563	0.0315237	0.922525	-	0.67	0.686667	3.96333	5.93
Apold1:chr6:134984264	0.0131418	0.181341	4.02795e-07	1.1323e-05	FALSE	missense_variant	p.K227R	c.680A>G	protein_coding	Apold1	apolipoprotein L domain containing 1	-	tolerated_low_confidence	ENSMUSG00000090698	4.78708e-07	1.15044e-05	0.616463	0.032776	-	4.77333	5.09667	6.28	7.22333
Rnf11:chr4:109454021	0.0135237	0.184618	4.23701e-07	1.14853e-05	FALSE	3_prime_UTR_variant	-	c.*230A>G	protein_coding	Rnf11	ring finger protein 11	-	-	ENSMUSG00000028557	0.00895234	0.0174594	-0.265734	0.403977	-	1.82667	3.63	1.62667	6.22667
Tmem127:chr2:127258316	0.0226864	0.249209	4.52823e-07	1.16855e-05	FALSE	3_prime_UTR_variant	-	c.*1052A>G	protein_coding	Tmem127	transmembrane protein 127	-	-	ENSMUSG00000034850	0.0181939	0.0309462	0.220208	0.491627	-	0.236667	8.62667	0.573333	0.853333
Arid5b:chr10:68092692	5.10298e-07	0.00020986	NA	NA	FALSE	3_prime_UTR_variant	-	c.*3812A>G	protein_coding	Arid5b	AT rich interactive domain 5B (MRF1-like)	-	-	ENSMUSG00000019947	0.0013475	0.00373191	0.734316	0.00653793	-	0	0	0	1.52333
Flnb:chr14:7936060	5.99692e-07	0.000232116	NA	NA	TRUE	intron_variant	-	c.6888+11A>G	protein_coding	Flnb	filamin, beta	-	-	ENSMUSG00000025278	0.0658187	0.0923445	-1	0.333333	-	NA	60	NA	26.97
Ankrd28:chr14:31701448	6.6926e-07	0.000244652	NA	NA	TRUE	3_prime_UTR_variant	-	c.*572A>G	protein_coding	Ankrd28	ankyrin repeat domain 28	-	-	ENSMUSG00000014496	0.00822292	0.0163362	0.704187	0.0773502	-	14.0567	16.67	0	0
Cnpy2:chr10:128327305	7.72349e-07	0.000255846	NA	NA	FALSE	3_prime_UTR_variant	-	c.*244A>G	protein_coding	Cnpy2	canopy FGF signaling regulator 2	-	-	ENSMUSG00000025381	0.00477616	0.0105586	0.564384	0.113407	B1_Mus1	12.54	0	0	0
Zcchc17:chr4:130359931	8.18191e-07	0.000255846	NA	NA	FALSE	5_prime_UTR_variant	-	c.-111A>G	protein_coding	Zcchc17	zinc finger, CCHC domain containing 17	-	-	ENSMUSG00000028772	0.00956028	0.0183567	-0.72392	0.00776983	-	0	0	0.776667	5.6
Nfia:chr4:98117441	8.54962e-07	0.000255846	NA	NA	TRUE	3_prime_UTR_variant	-	c.*6206A>G	protein_coding	Nfia	nuclear factor I/A	-	-	ENSMUSG00000028565	0.00866291	0.0170287	0.4	0.75	-	51	100	40	NA
Zswim1:chr2:164826386	8.55414e-07	0.000255846	NA	NA	FALSE	3_prime_UTR_variant	-	c.*189A>G	protein_coding	Zswim1	zinc finger SWIM-type containing 1	-	-	ENSMUSG00000017764	4.62766e-05	0.000294667	-0.0909091	0.811417	B1F	9.03333	3.34	6.07667	42.86
Eif4g2:chr7:111073878	0.00290836	0.0747259	1.04611e-06	2.33529e-05	FALSE	missense_variant	p.K869R	c.2606A>G	protein_coding	Eif4g2	eukaryotic translation initiation factor 4, gamma 2	-	deleterious	ENSMUSG00000005610	0.0202296	0.0340204	-0.594406	0.0457531	-	1.52333	1.27	2.50667	3.22667
Calcrl:chr2:84332785	0.00425066	0.0926137	1.15152e-06	2.48975e-05	FALSE	3_prime_UTR_variant	-	c.*669A>G	protein_coding	Calcrl	calcitonin receptor-like	-	-	ENSMUSG00000059588	2.80944e-05	0.00020379	-0.381818	0.248381	-	11.85	17.4	4.71	35.77
Fam219a:chr4:41519448	0.0477383	0.344077	1.18091e-06	2.48975e-05	FALSE	3_prime_UTR_variant	-	c.*792A>G	protein_coding	Fam219a	family with sequence similarity 219, member A	-	-	ENSMUSG00000028439	0.0762264	0.104593	-0.36612	0.241813	-	0.433333	13.4267	1.36	0
Wwtr1:chr3:57552697	0.00159894	0.052605	1.22514e-06	2.51319e-05	FALSE	intron_variant	-	c.602+22126A>G	protein_coding	Wwtr1	WW domain containing transcription regulator 1	-	-	ENSMUSG00000027803	0.152024	0.192394	0.885714	0.0333333	B1_Mur2	49.02	100	4.545	40
Ubxn2b:chr4:6217607	1.57154e-06	0.000449598	NA	NA	FALSE	3_prime_UTR_variant	-	c.*1533A>G	protein_coding	Ubxn2b	UBX domain protein 2B	-	-	ENSMUSG00000028243	0.00150111	0.00405192	-0.163663	0.698567	-	1.01	0	11.805	NA
Sp100:chr1:85684948	1.65793e-06	0.000454549	NA	NA	FALSE	intron_variant	-	c.988+3809A>G	protein_coding	Sp100	nuclear antigen Sp100	-	-	ENSMUSG00000026222	0.548198	0.586793	-1	0.333333	-	NA	NA	60	11.145
Stim2:chr5:54119374	1.80012e-06	0.000473791	NA	NA	FALSE	3_prime_UTR_variant	-	c.*625A>G	protein_coding	Stim2	stromal interaction molecule 2	-	-	ENSMUSG00000039156	0.0036908	0.00841038	0.559916	0.0583293	-	0	0	2.03333	0
Sec22b:chr3:97921679	0.0123207	0.174724	2.01877e-06	3.64821e-05	FALSE	3_prime_UTR_variant	-	c.*409A>G	protein_coding	Sec22b	SEC22 homolog B, vesicle trafficking protein	-	-	ENSMUSG00000027879	3.44151e-06	4.10468e-05	-0.187152	0.560273	-	0	0.386667	2.18	0.666667
Tomm6:chr17:47686745	2.2535e-06	0.00057031	NA	NA	FALSE	3_prime_UTR_variant	-	c.*268A>G	protein_coding	Tomm6	translocase of outer mitochondrial membrane 6	-	-	ENSMUSG00000033475	0.880409	0.896045	-0.277218	0.594824	-	15.48	0	0	15
Prkab1:chr5:116024391	2.38384e-06	0.000573032	NA	NA	FALSE	5_prime_UTR_variant	-	c.-142A>G	protein_coding	Prkab1	protein kinase, AMP-activated, beta 1 non-catalytic subunit	-	-	ENSMUSG00000029513	0.00031202	0.00117997	-0.86014	0.000597084	-	5.34667	9.93	5.77	18.4567
R3hcc1l:chr19:42520832	2.43843e-06	0.000573032	NA	NA	FALSE	intron_variant	-	c.-15+1975A>G	protein_coding	R3hcc1l	R3H domain and coiled-coil containing 1 like	-	-	ENSMUSG00000025184	0.341717	0.382826	0.633054	0.0672438	B1_Mur1	1.71	100	14.8133	0
Bnip3l:chr14:67008826	0.00764299	0.133819	2.6294e-06	4.6412e-05	FALSE	5_prime_UTR_variant	-	c.-42A>G	protein_coding	Bnip3l	BCL2/adenovirus E1B interacting protein 3-like	-	-	ENSMUSG00000022051	0.00359434	0.00823933	-0.671329	0.0204419	-	5.14333	4.98333	7.59333	12.5033
Sod2:chr17:13019564	2.88795e-06	0.000633788	NA	NA	TRUE	3_prime_UTR_variant	-	c.*4393A>G	protein_coding	Sod2	superoxide dismutase 2, mitochondrial	-	-	ENSMUSG00000006818	0.075211	0.103715	-0.0285714	1	MER44B	48.915	14.29	60	35.415
Znfx1:chr2:167046389	2.88961e-06	0.000633788	NA	NA	FALSE	intron_variant	-	c.2395+503A>G	protein_coding	Znfx1	zinc finger, NFX1-type containing 1	-	-	ENSMUSG00000039501	0.000268108	0.00104031	0.0285714	1	B1_Mm	16.67	50	0	6.47667
Akap12:chr10:4351859	3.05692e-06	0.000648856	NA	NA	FALSE	intron_variant	-	c.266-1283A>G	protein_coding	Akap12	A kinase (PRKA) anchor protein (gravin) 12	-	-	ENSMUSG00000038587	0.000443583	0.00151591	-0.637536	0.17326	B2_Mm1t	NA	70	5.89667	0
Rbm15b:chr9:106881705	3.17803e-06	0.000653482	NA	NA	FALSE	3_prime_UTR_variant	-	c.*2599A>G	protein_coding	Rbm15b	RNA binding motif protein 15B	-	-	ENSMUSG00000074102	0.000885526	0.00258712	-0.536991	0.0885087	-	0.93	0	0	8.125
Dnajc18:chr18:35672734	3.49704e-06	0.000697289	NA	NA	FALSE	3_prime_UTR_variant	-	c.*2385A>G	protein_coding	Dnajc18	DnaJ heat shock protein family (Hsp40) member C18	-	-	ENSMUSG00000024350	0.0307092	0.0479631	0.413053	0.182022	B1_Mur4	2.98	0	0	0
H3f3a:chr1:180809862	4.36288e-06	0.000844345	NA	NA	FALSE	intron_variant	-	c.282+255A>G	protein_coding	H3f3a	H3 histone, family 3A	-	-	ENSMUSG00000060743	0.000163783	0.00073065	-0.310376	0.416291	B1_Mus1	10.4467	0	0	35.71
Smad3:chr9:63647387	0.00312624	0.0782813	4.89923e-06	8.08373e-05	FALSE	3_prime_UTR_variant	-	c.*2875A>G	protein_coding	Smad3	SMAD family member 3	-	-	ENSMUSG00000032402	0.274465	0.319995	-0.0725114	0.822799	-	3.12667	0	9.79667	14.21
Arfrp1:chr2:181359338	0.0374443	0.312669	5.39608e-06	8.71409e-05	FALSE	3_prime_UTR_variant	-	c.*136A>G	protein_coding	Arfrp1	ADP-ribosylation factor related protein 1	-	-	ENSMUSG00000038671	0.00016184	0.000726332	-0.550737	0.0634979	-	0	1.16333	0	6.14667
Ankrd28:chr14:31701475	5.61874e-06	0.00105632	NA	NA	TRUE	3_prime_UTR_variant	-	c.*545A>G	protein_coding	Ankrd28	ankyrin repeat domain 28	-	-	ENSMUSG00000014496	0.00822292	0.0163362	0.756787	0.0489051	-	33.27	0	0	17.145
Sec22b:chr3:97901239	5.83124e-06	0.00106582	NA	NA	FALSE	5_prime_UTR_variant	-	c.-107A>G	protein_coding	Sec22b	SEC22 homolog B, vesicle trafficking protein	-	-	ENSMUSG00000027879	3.44151e-06	4.10468e-05	0.819379	0.00110835	-	5.64	9.70333	0.833333	0
Tmem168:chr6:13582426	0.00487755	0.100295	5.9661e-06	9.4339e-05	FALSE	3_prime_UTR_variant	-	c.*361A>G	protein_coding	Tmem168	transmembrane protein 168	-	-	ENSMUSG00000029569	0.00829838	0.0164423	0.0910684	0.778346	-	1.38667	4.12	8.58333	1.92667
Lman1:chr18:65981947	6.33209e-06	0.00112608	NA	NA	FALSE	3_prime_UTR_variant	-	c.*1904A>G	protein_coding	Lman1	lectin, mannose-binding, 1	-	-	ENSMUSG00000041891	0.00153366	0.00412483	0.146863	0.648773	-	0	2.61333	0	0
Dhx36:chr3:62470734	7.36826e-06	0.00127587	NA	NA	FALSE	missense_variant	p.E945G	c.2834A>G	protein_coding	Dhx36	DEAH (Asp-Glu-Ala-His) box polypeptide 36	-	deleterious	ENSMUSG00000027770	0.00479507	0.010566	0.00578122	0.986541	-	0	6.07	0	0
Map4k2:chr19:6354238	7.56423e-06	0.00127622	NA	NA	FALSE	3_prime_UTR_variant	-	c.*711A>G	protein_coding	Map4k2	mitogen-activated protein kinase kinase kinase kinase 2	-	-	ENSMUSG00000024948	0.0573979	0.0820132	0.587282	0.0446686	-	0.823333	0.16	3.11667	0.46
Pcdh1:chr18:38197088	8.6272e-06	0.00141917	NA	NA	FALSE	3_prime_UTR_variant	-	c.*161A>G	protein_coding	Pcdh1	protocadherin 1	-	-	ENSMUSG00000051375	0.0598842	0.0849785	0.304122	0.33652	-	0.433333	0	1.73333	0
Azin1:chr15:38490101	0.0330526	0.294563	8.75446e-06	0.000132893	FALSE	3_prime_UTR_variant	-	c.*260A>G	protein_coding	Azin1	antizyme inhibitor 1	-	-	ENSMUSG00000037458	0.0575796	0.0820206	-0.116018	0.719549	-	1.46	1.01333	0.0666667	0.23
Cttnbp2nl:chr3:105003548	0.0355739	0.30087	1.0667e-05	0.000155698	FALSE	3_prime_UTR_variant	-	c.*1102A>G	protein_coding	Cttnbp2nl	CTTNBP2 N-terminal like	-	-	ENSMUSG00000062127	0.104148	0.138307	-0.0175132	0.956919	-	0.353333	1.18667	2.50333	5.58
Laptm4a:chr12:8922062	1.15647e-05	0.00185599	NA	NA	FALSE	missense_variant	p.E35G	c.104A>G	protein_coding	Laptm4a	lysosomal-associated protein transmembrane 4A	-	tolerated_low_confidence	ENSMUSG00000020585	0.220629	0.264258	0.591564	0.0427573	-	3.76333	1.65667	0.623333	0.293333
Rchy1:chr5:91949146	0.0381497	0.314567	1.17719e-05	0.000162571	TRUE	3_prime_UTR_variant	-	c.*590A>G	protein_coding	Rchy1	ring finger and CHY zinc finger domain containing 1	-	-	ENSMUSG00000029397	7.96048e-06	7.50704e-05	-0.339621	0.280123	B1_Mus2	1.08667	0	0	5.28667
Gclm:chr3:122262763	0.02896	0.278375	1.24943e-05	0.000169343	FALSE	synonymous_variant	p.L167=	c.501A>G	protein_coding	Gclm	glutamate-cysteine ligase, modifier subunit	-	-	ENSMUSG00000028124	4.29807e-05	0.0002803	-0.427114	0.166105	-	0.356667	0.283333	0.996667	2.45333
Ikbip:chr10:91098466	1.29731e-05	0.0019869	NA	NA	TRUE	3_prime_UTR_variant	-	c.*1849A>G	protein_coding	Ikbip	IKBKB interacting protein	-	-	ENSMUSG00000019975	0.00182945	0.00472911	0.0285714	1	PB1D10	9.005	93.75	8.335	NA
Ablim1:chr19:57033582	1.29843e-05	0.0019869	NA	NA	FALSE	3_prime_UTR_variant	-	c.*3642A>G	protein_coding	Ablim1	actin-binding LIM protein 1	-	-	ENSMUSG00000025085	9.36702e-08	4.65229e-06	-0.594406	0.0457531	-	0.68	0.666667	1.31333	3.05
Vat1:chr11:101459035	1.3368e-05	0.00199913	NA	NA	FALSE	3_prime_UTR_variant	-	c.*1158A>G	protein_coding	Vat1	vesicle amine transport 1	-	-	ENSMUSG00000034993	0.365758	0.406701	0.100968	0.75487	-	2.37667	0	0	0
Ncl:chr1:86347801	1.5501e-05	0.00226658	NA	NA	TRUE	3_prime_UTR_variant	-	c.*2819A>G	protein_coding	Ncl	nucleolin	-	-	ENSMUSG00000026234	0.419114	0.458425	-0.177325	0.703674	B1_Mus1	2.38	80	5.55667	NA
Acbd3:chr1:180753504	0.0759994	0.400942	1.60933e-05	0.000210601	FALSE	3_prime_UTR_variant	-	c.*1134A>G	protein_coding	Acbd3	acyl-Coenzyme A binding domain containing 3	-	-	ENSMUSG00000026499	0.0554706	0.0797791	0.268728	0.398356	-	1.07	8.27667	0	0
Luzp1:chr4:136493046	1.62549e-05	0.00232515	NA	NA	FALSE	intron_variant	-	c.-308+23196A>G	protein_coding	Luzp1	leucine zipper protein 1	-	-	ENSMUSG00000001089	0.00492294	0.010787	-0.698253	0.122839	B2_Mm1a	NA	68.335	8.335	0
Hip1:chr5:135408861	1.68254e-05	0.00235555	NA	NA	TRUE	3_prime_UTR_variant	-	c.*2356A>G	protein_coding	Hip1	huntingtin interacting protein 1	-	-	ENSMUSG00000039959	2.84242e-05	0.00020379	-0.545455	0.0706789	B1_Mur1	25.8067	30.7533	38.29	44.88
Spns2:chr11:72452095	1.78746e-05	0.00242386	NA	NA	FALSE	3_prime_UTR_variant	-	c.*1025A>G	protein_coding	Spns2	spinster homolog 2	-	-	ENSMUSG00000040447	0.0276795	0.0440625	-0.323952	0.304307	-	0.836667	0.313333	0.793333	4.73667
Canx:chr11:50325618	1.81094e-05	0.00242386	NA	NA	FALSE	5_prime_UTR_variant	-	c.-129A>G	protein_coding	Canx	calnexin	-	-	ENSMUSG00000020368	0.032235	0.049618	-0.146863	0.648773	-	0	0	5.98667	0
Dtx3l:chr16:35926902	0.00816902	0.137851	1.82846e-05	0.00023522	TRUE	3_prime_UTR_variant	-	c.*2397A>G	protein_coding	Dtx3l	deltex 3-like, E3 ubiquitin ligase	-	-	ENSMUSG00000049502	8.10012e-05	0.000447007	0.0630474	0.845664	ID_B1	9.62333	22.64	15.12	25.77
Apbb2:chr5:66541132	1.84184e-05	0.00242386	NA	NA	FALSE	intron_variant	-	c.-166+2330A>G	protein_coding	Apbb2	amyloid beta (A4) precursor protein-binding, family B, member 2	-	-	ENSMUSG00000029207	0.222679	0.265859	-0.495682	0.121017	MTD	0.71	0	6.25	28.03
Gm2a:chr11:55110583	0.0166801	0.212703	1.87569e-05	0.000237274	TRUE	3_prime_UTR_variant	-	c.*1050A>G	protein_coding	Gm2a	GM2 ganglioside activator protein	-	-	ENSMUSG00000000594	2.80826e-06	3.73599e-05	-0.59895	0.0395981	-	2.97667	0.48	4.31667	6.07333
Aftph:chr11:20724489	1.9199e-05	0.00243072	NA	NA	TRUE	intron_variant	-	c.1923+1196A>G	protein_coding	Aftph	aftiphilin	-	-	ENSMUSG00000049659	0.000225568	0.00090837	0.642857	0.138889	-	36.665	0	17.145	46.875
Agfg2:chr5:137651381	1.92094e-05	0.00243072	NA	NA	FALSE	3_prime_UTR_variant	-	c.*388A>G	protein_coding	Agfg2	ArfGAP with FG repeats 2	-	-	ENSMUSG00000029722	0.204284	0.248507	0.452284	0.139875	-	2.70667	14.5967	0	0
Dnajb6:chr5:29736021	0.0219142	0.244814	1.97247e-05	0.000245427	FALSE	5_prime_UTR_variant	-	c.-122A>G	protein_coding	Dnajb6	DnaJ heat shock protein family (Hsp40) member B6	-	-	ENSMUSG00000029131	0.000169007	0.000745032	0.440559	0.154216	-	12.5033	4.29	5.51	14.05
Pcnp:chr16:56017116	2.29287e-05	0.00284662	NA	NA	FALSE	3_prime_UTR_variant	-	c.*75A>G	protein_coding	Pcnp	PEST proteolytic signal containing nuclear protein	-	-	ENSMUSG00000071533	0.00502002	0.0109191	-0.148162	0.645846	-	0.473333	0	1.58667	0
Ppfia1:chr7:144549414	2.39528e-05	0.00291869	NA	NA	TRUE	intron_variant	-	c.264+2856A>G	protein_coding	Ppfia1	protein tyrosine phosphatase, receptor type, f polypeptide (PTPRF), interacting protein (liprin), alpha 1	-	-	ENSMUSG00000037519	0.00555428	0.0117555	0.478091	0.277852	B3	40	0	7.145	NA
Slc6a6:chr6:91758153	0.0458209	0.338766	2.60365e-05	0.000306556	TRUE	3_prime_UTR_variant	-	c.*3096A>G	protein_coding	Slc6a6	solute carrier family 6 (neurotransmitter transporter, taurine), member 6	-	-	ENSMUSG00000030096	0.00198445	0.00499464	-0.328671	0.297385	-	0.606667	0.393333	1.24	1.86
Ovca2:chr11:75177424	2.60465e-05	0.00311611	NA	NA	TRUE	3_prime_UTR_variant	-	c.*470A>G	protein_coding	Ovca2	candidate tumor suppressor in ovarian cancer 2	-	-	ENSMUSG00000038268	0.0149583	0.0265966	0.236364	0.513898	-	5.61333	37.865	11.15	10.425
Tpd52l2:chr2:181515406	0.001942	0.0586163	2.62532e-05	0.000306556	TRUE	3_prime_UTR_variant	-	c.*231A>G	protein_coding	Tpd52l2	tumor protein D52-like 2	rs13468303	-	ENSMUSG00000000827	0.132419	0.170678	-0.307692	0.330863	-	17.8167	22.4967	17.5267	10.41
Rab6a:chr7:100639962	0.00661404	0.121906	2.68987e-05	0.000309335	FALSE	3_prime_UTR_variant	-	c.*643A>G	protein_coding	Rab6a	RAB6A, member RAS oncogene family	-	-	ENSMUSG00000030704	0.118025	0.15426	0.160839	0.619356	-	1.35333	4.34333	2.83	3.93667
Map4k2:chr19:6354608	2.72899e-05	0.00320656	NA	NA	FALSE	3_prime_UTR_variant	-	c.*1081A>G	protein_coding	Map4k2	mitogen-activated protein kinase kinase kinase kinase 2	-	-	ENSMUSG00000024948	0.0573979	0.0820132	0.0105079	0.974145	-	0.466667	2.70667	4.80333	9.63333
Isoc1:chr18:58678008	2.82505e-05	0.0032612	NA	NA	FALSE	3_prime_UTR_variant	-	c.*97A>G	protein_coding	Isoc1	isochorismatase domain containing 1	-	-	ENSMUSG00000024601	0.0011351	0.00320322	-0.145616	0.651588	-	0.216667	0	1.55333	0
Ppp6c:chr2:39194937	0.0111467	0.162269	2.91324e-05	0.000330022	FALSE	3_prime_UTR_variant	-	c.*2404A>G	protein_coding	Ppp6c	protein phosphatase 6, catalytic subunit	-	-	ENSMUSG00000026753	0.00215709	0.00537469	0.0485203	0.880969	-	0.916667	0	5.39333	0.47
Sertad1:chr7:27486949	3.00656e-05	0.00335659	NA	NA	FALSE	5_prime_UTR_variant	-	c.-133A>G	protein_coding	Sertad1	SERTA domain containing 1	-	-	ENSMUSG00000008384	0.00026492	0.00103333	0.845154	0.0341094	-	18.335	20	37.5	20
Atxn1:chr13:45680218	3.00971e-05	0.00335659	NA	NA	TRUE	intron_variant	-	c.-164+17603A>G	protein_coding	Atxn1	ataxin 1	-	-	ENSMUSG00000046876	0.271095	0.317058	0.2	0.916667	B1F	30	NA	57.14	18.335
Limd2:chr11:106157074	3.12531e-05	0.00342743	NA	NA	TRUE	3_prime_UTR_variant	-	c.*1600A>G	protein_coding	Limd2	LIM domain containing 2	-	-	ENSMUSG00000040699	0.000111187	0.000563498	0.974679	0.00481823	B1_Mur2	30.9933	0	NA	NA
Hinfp:chr9:44293226	3.18257e-05	0.003433	NA	NA	FALSE	3_prime_UTR_variant	-	c.*2970A>G	protein_coding	Hinfp	histone H4 transcription factor	-	-	ENSMUSG00000032119	0.00369154	0.00841038	-0.19518	0.643226	-	22.98	34.285	0	NA
AW112010:chr19:11050423	3.29115e-05	0.00349287	NA	NA	FALSE	non_coding_transcript_exon_variant	-	n.144A>G	lincRNA	AW112010	expressed sequence AW112010	-	-	ENSMUSG00000075010	2.76289e-05	0.00020379	0.846154	0.00096954	-	2.26	2.51333	2.96667	11.34
Gm29609:chr5:31173480	3.41516e-05	0.00356695	NA	NA	TRUE	intron_variant	-	c.563+288A>G	protein_coding	Gm29609	predicted gene 29609	-	-	ENSMUSG00000101678	0.0171101	0.0297828	0.180838	0.573812	PB1D10	3.86667	24.89	2.3	1.58667
Wdr37:chr13:8851765	3.54601e-05	0.00364575	NA	NA	TRUE	intron_variant	-	c.396+1905A>G	protein_coding	Wdr37	WD repeat domain 37	-	-	ENSMUSG00000021147	0.615682	0.650614	-0.220295	0.491451	B1_Mur2	0	0	9.08667	0
Ppp2r5b:chr19:6233874	0.0416586	0.324892	3.94568e-05	0.000434025	FALSE	missense_variant	p.K100R	c.299A>G	protein_coding	Ppp2r5b	protein phosphatase 2, regulatory subunit B', beta	-	deleterious	ENSMUSG00000024777	0.000730095	0.00222514	0.0183579	0.954843	-	0	0	0.336667	3
Snapc1l:chr12:73946412	0.00448346	0.0946253	4.03727e-05	0.000437755	TRUE	intron_variant	-	c.148+8612A>G	protein_coding	Snapc1l	predicted gene, 49321	-	-	ENSMUSG00000114046	NA	NA	NA	NA	-	5.24667	14.4767	5.71	6.26667
Ndufaf8:chr11:120100603	4.1788e-05	0.00423024	NA	NA	TRUE	3_prime_UTR_variant	-	c.*400A>G	protein_coding	Ndufaf8	NADH:ubiquinone oxidoreductase complex assembly factor 8	-	-	ENSMUSG00000078572	0.123562	0.160094	-0.150214	0.678722	B1_Mur3	5.23	0	17.065	0
Fbxw2:chr2:34823396	4.38424e-05	0.00431526	NA	NA	TRUE	intron_variant	-	c.-20-329A>G	protein_coding	Fbxw2	F-box and WD-40 domain protein 2	-	-	ENSMUSG00000035949	0.00164508	0.00437709	1	0.0833333	B1_Mus1	30	75	35.415	NA
Ifrd1:chr12:40218398	4.42853e-05	0.00431526	NA	NA	TRUE	intron_variant	-	c.89-916A>G	protein_coding	Ifrd1	interferon-related developmental regulator 1	-	-	ENSMUSG00000001627	5.32874e-08	3.05378e-06	1	0.333333	B1_Mus1	NA	19.09	44.44	NA
Tpd52l2:chr2:181515407	4.45953e-05	0.00431526	NA	NA	FALSE	3_prime_UTR_variant	-	c.*232A>G	protein_coding	Tpd52l2	tumor protein D52-like 2	-	-	ENSMUSG00000000827	0.132419	0.170678	0.178634	0.578567	-	3.41333	3.41	2.75	0.423333
Tmtc1:chr6:148441106	4.61094e-05	0.0043971	NA	NA	TRUE	intron_variant	-	c.299+2795A>G	protein_coding	Tmtc1	transmembrane and tetratricopeptide repeat containing 1	-	-	ENSMUSG00000030306	0.925565	0.936883	0.252262	0.585241	-	55.555	0	0	33.9667
Acvrl1:chr15:101144156	4.72514e-05	0.00444163	NA	NA	FALSE	3_prime_UTR_variant	-	c.*679A>G	protein_coding	Acvrl1	activin A receptor, type II-like 1	-	-	ENSMUSG00000000530	0.00855218	0.0168555	-0.679511	0.0150702	-	0.236667	0.123333	0.523333	1.66
Abhd2:chr7:79362194	0.0107568	0.160136	4.89193e-05	0.000515691	TRUE	3_prime_UTR_variant	-	c.*2038A>G	protein_coding	Abhd2	abhydrolase domain containing 2	-	-	ENSMUSG00000039202	0.029068	0.0458544	0.538462	0.0749023	-	5.29667	10.2267	4.58667	2.73667
Icam1:chr9:21019447	4.92028e-05	0.00455992	NA	NA	TRUE	intron_variant	-	c.328+268A>G	protein_coding	Icam1	intercellular adhesion molecule 1	-	-	ENSMUSG00000037405	3.97506e-09	4.18943e-07	-0.173121	0.610718	B1_Mus2	18.335	1.75333	1.92667	6.87667
Cxcl10:chr5:92348879	4.99454e-05	0.00456445	NA	NA	FALSE	5_prime_UTR_variant	-	c.-65A>G	protein_coding	Cxcl10	chemokine (C-X-C motif) ligand 10	-	-	ENSMUSG00000034855	4.70132e-12	1.75124e-09	0.666886	0.218894	-	NA	NA	0	3.32
Mapk7:chr11:61491535	5.21576e-05	0.00470133	NA	NA	FALSE	missense_variant	p.K184E	c.550A>G	protein_coding	Mapk7	mitogen-activated protein kinase 7	-	deleterious	ENSMUSG00000001034	1.71112e-05	0.000134188	0.23703	0.482823	-	0	0	2.81333	0
Susd6:chr12:80793823	5.61203e-05	0.00499016	NA	NA	TRUE	intron_variant	-	c.-98+3008A>G	protein_coding	Susd6	sushi domain containing 6	-	-	ENSMUSG00000021133	0.869516	0.886169	0.8	0.333333	B1_Mur2	0	27.27	15.48	NA
Kif2a:chr13:107022083	5.71733e-05	0.005016	NA	NA	FALSE	5_prime_UTR_variant	-	c.-472A>G	protein_coding	Kif2a	kinesin family member 2A	-	-	ENSMUSG00000021693	0.385022	0.426847	-0.632456	0.367544	-	21.11	20	NA	0
Rab3d:chr9:21907836	0.00159285	0.052605	6.17927e-05	0.000632606	TRUE	3_prime_UTR_variant	-	c.*2648A>G	protein_coding	Rab3d	RAB3D, member RAS oncogene family	-	-	ENSMUSG00000019066	5.36905e-05	0.000330574	-0.0909091	0.796592	B1_Mur3	17.1633	43.8867	20.7533	12.88
Ndufv1:chr19:4012666	0.00179498	0.0559761	6.46627e-05	0.000645776	FALSE	5_prime_UTR_variant	-	c.-44A>G	protein_coding	Ndufv1	NADH:ubiquinone oxidoreductase core subunit V1	-	-	ENSMUSG00000037916	0.502486	0.540971	-0.146853	0.651073	-	10.6267	10.0633	8.98	21.3
Psmd7:chr8:107588451	6.52588e-05	0.00565004	NA	NA	FALSE	5_prime_UTR_variant	-	c.-99A>G	protein_coding	Psmd7	proteasome (prosome, macropain) 26S subunit, non-ATPase, 7	-	-	ENSMUSG00000039067	0.279115	0.3244	0.0900937	0.847672	-	10.88	24.0733	0	0
Ifnar1:chr16:91490702	0.00542521	0.107543	6.70246e-05	0.000660671	TRUE	intron_variant	-	c.197+883A>G	protein_coding	Ifnar1	interferon (alpha and beta) receptor 1	-	-	ENSMUSG00000022967	1.20336e-05	9.96116e-05	-0.363636	0.246255	B3	25.6767	19.5867	33.0167	52.0267
Itprid2:chr2:79672286	0.0237145	0.253389	6.98313e-05	0.000662874	FALSE	3_prime_UTR_variant	-	c.*541A>G	protein_coding	Itprid2	ITPR interacting domain containing 2	-	-	ENSMUSG00000027007	0.00071547	0.00220203	-0.52114	0.0823085	-	0.8	0.323333	0.633333	3.08333
Pwwp2a:chr11:43706545	7.3313e-05	0.00618843	NA	NA	FALSE	3_prime_UTR_variant	-	c.*343A>G	protein_coding	Pwwp2a	PWWP domain containing 2A	-	-	ENSMUSG00000044950	0.00204449	0.00511123	-0.630062	0.12936	-	5.555	0	13.81	42.86
Ift22:chr5:136913099	7.33583e-05	0.00618843	NA	NA	TRUE	3_prime_UTR_variant	-	c.*126A>G	protein_coding	Ift22	intraflagellar transport 22	-	-	ENSMUSG00000007987	0.573543	0.611287	0.0845091	0.793996	PB1D10	5.31667	16.5367	6.29667	0
Ubb-ps:chr14:46084028	7.53373e-05	0.00625661	NA	NA	FALSE	non_coding_transcript_exon_variant	-	n.1A>G	processed_transcript	Ubb-ps	predicted gene 1821	-	-	ENSMUSG00000044285	0.377626	0.419271	0.140364	0.663488	L1Md_F2	3.36333	1.57	0	0
Map1s:chr8:70906001	7.6116e-05	0.00625661	NA	NA	FALSE	5_prime_UTR_variant	-	c.-3A>G	protein_coding	Map1s	microtubule-associated protein 1S	-	-	ENSMUSG00000019261	0.0141686	0.0254352	-0.102418	0.778295	-	10.92	0	0	20
Mlh3:chr12:85234711	7.7019e-05	0.00625661	NA	NA	FALSE	3_prime_UTR_variant	-	c.*911A>G	protein_coding	Mlh3	mutL homolog 3	-	-	ENSMUSG00000021245	0.00104386	0.00297959	0.239046	0.605678	B1_Mur4	9.72	0	0	NA
Mydgf:chr17:56175902	0.00849649	0.140823	8.39906e-05	0.000768058	TRUE	3_prime_UTR_variant	-	c.*1022A>G	protein_coding	Mydgf	myeloid derived growth factor	-	-	ENSMUSG00000019579	0.768578	0.796371	0.0559441	0.86898	B2_Mm2	24.4767	14.66	10.3867	39.63
Caskin2:chr11:115804552	8.71016e-05	0.00698938	NA	NA	FALSE	missense_variant	p.K285R	c.854A>G	protein_coding	Caskin2	CASK-interacting protein 2	-	deleterious	ENSMUSG00000034471	7.86011e-05	0.00044362	0.347107	0.268969	-	0.153333	0.216667	1.97	0.296667
Lrrc58:chr16:37868862	0.0192758	0.229373	8.98255e-05	0.000802089	FALSE	missense_variant	p.S123G	c.367A>G	protein_coding	Lrrc58	leucine rich repeat containing 58	-	tolerated	ENSMUSG00000034158	0.004653	0.0103477	-0.299553	0.344193	-	0	0	0.926667	4.26333
Nip7:chr8:107059408	9.0512e-05	0.00717553	NA	NA	TRUE	3_prime_UTR_variant	-	c.*912A>G	protein_coding	Nip7	NIP7, nucleolar pre-rRNA processing protein	-	-	ENSMUSG00000031917	1.30408e-05	0.000106763	-0.724714	0.103243	MT2B,B1_Mur1	30.46	0	43.75	NA
Grb10:chr11:11931072	9.50446e-05	0.00744516	NA	NA	FALSE	3_prime_UTR_variant	-	c.*2391A>G	protein_coding	Grb10	growth factor receptor bound protein 10	-	-	ENSMUSG00000020176	0.0342765	0.0521756	-0.0956906	0.767363	-	0.71	4.62333	0	0
Atpif1:chr4:132533615	0.000103942	0.00797415	NA	NA	FALSE	5_prime_UTR_variant	-	c.-47A>G	protein_coding	Atpif1	ATPase inhibitory factor 1	-	-	ENSMUSG00000054428	0.677485	0.709882	-0.265165	0.404878	-	5.04333	1.19	5.46	0
Prxl2c:chr13:64290302	0.000104221	0.00797415	NA	NA	FALSE	3_prime_UTR_variant	-	c.*1799A>G	protein_coding	Prxl2c	AhpC/TSA antioxidant enzyme domain containing 1	-	-	ENSMUSG00000021482	0.000474608	0.00158945	0.423819	0.169753	B1F	3.33667	3.51667	4.81667	0.763333
Heg1:chr16:33759600	0.00010715	0.00810396	NA	NA	FALSE	intron_variant	-	c.3602-1158A>G	protein_coding	Heg1	heart development protein with EGF-like domains 1	-	-	ENSMUSG00000075254	0.622629	0.657024	0.221327	0.567119	B1_Mm	0	66.67	23.8367	11.43
Itga1:chr13:115101653	0.000109122	0.00815934	NA	NA	FALSE	5_prime_UTR_variant	-	c.-122A>G	protein_coding	Itga1	integrin alpha 1	-	-	ENSMUSG00000042284	0.837964	0.862269	0.152561	0.635967	-	0.176667	0.22	2.24333	0.553333
Icam1:chr9:21020593	0.00011192	0.00827451	NA	NA	TRUE	intron_variant	-	c.328+1414A>G	protein_coding	Icam1	intercellular adhesion molecule 1	-	-	ENSMUSG00000037405	3.97506e-09	4.18943e-07	0.857143	0.0238095	B1_Mur1	NA	0	3.71	19.5633
Lurap1:chr4:116136328	0.0468282	0.3406	0.000117165	0.000988089	FALSE	3_prime_UTR_variant	-	c.*985A>G	protein_coding	Lurap1	leucine rich adaptor protein 1	-	-	ENSMUSG00000028701	0.000448315	0.00152509	-0.129227	0.704921	B1_Mur4	0	9.92	1.75333	7.895
Trnau1ap:chr4:132329527	0.000118424	0.00865812	NA	NA	FALSE	5_prime_UTR_variant	-	c.-148A>G	protein_coding	Trnau1ap	tRNA selenocysteine 1 associated protein 1	-	-	ENSMUSG00000028898	0.23713	0.281309	0.771429	0.102778	-	28.57	18.18	22.5	41.43
Ppp1cb:chr5:32459337	0.000126447	0.00914306	NA	NA	FALSE	5_prime_UTR_variant	-	c.-19A>G	protein_coding	Ppp1cb	protein phosphatase 1 catalytic subunit beta	-	-	ENSMUSG00000014956	0.142436	0.182328	0.102297	0.751734	-	0.23	1.61333	2.27333	0.656667
Gm21985:chr2:112337367	0.000129409	0.00925556	NA	NA	FALSE	missense_variant	p.T219A	c.655A>G	nonsense_mediated_decay	Gm21985	predicted gene 21985	-	deleterious	ENSMUSG00000096764	NA	NA	NA	NA	-	1.59333	3.24	6.07667	0
Rnf125:chr18:20961599	0.00471989	0.0979713	0.000129748	0.00108218	FALSE	intron_variant	-	c.-115-12700A>G	protein_coding	Rnf125	ring finger protein 125	-	-	ENSMUSG00000033107	1.47548e-05	0.000118197	0.11951	0.711424	-	4.22	4.54667	11.7933	1.5
Qpctl:chr7:19140399	0.0418037	0.324961	0.000135229	0.00109675	FALSE	3_prime_UTR_variant	-	c.*755A>G	protein_coding	Qpctl	glutaminyl-peptide cyclotransferase-like	-	-	ENSMUSG00000030407	0.00242761	0.00596889	-0.413627	0.181354	B1_Mus1	4.05333	19.71	13.4433	0.9
Pnkd:chr1:74349352	0.0971926	0.432854	0.000135829	0.00109675	FALSE	missense_variant	p.D190G	c.569A>G	protein_coding	Pnkd	paroxysmal nonkinesiogenic dyskinesia	-	tolerated	ENSMUSG00000026179	6.46823e-07	1.35636e-05	-0.654463	0.0209325	-	0.123333	0	0.273333	3.99667
Lzts1:chr8:69134542	0.000136408	0.00955759	NA	NA	FALSE	3_prime_UTR_variant	-	c.*961A>G	protein_coding	Lzts1	leucine zipper, putative tumor suppressor 1	-	-	ENSMUSG00000036306	4.74514e-05	0.000299588	-0.0273115	0.940301	-	1.11	1.51667	2.02	20
Ube2d2a:chr18:35801360	0.000136537	0.00955759	NA	NA	FALSE	missense_variant	p.R131G	c.391A>G	protein_coding	Ube2d2a	ubiquitin-conjugating enzyme E2D 2A	-	deleterious_low_confidence	ENSMUSG00000091896	0.013045	0.02382	-0.776224	0.00465988	-	2.70333	1.47333	2.75333	5.29667
Gtf3c3:chr1:54397335	0.000145156	0.010054	NA	NA	TRUE	3_prime_UTR_variant	-	c.*545A>G	protein_coding	Gtf3c3	general transcription factor IIIC, polypeptide 3	-	-	ENSMUSG00000041303	2.20236e-05	0.000165733	0.542451	0.131319	ID2	86.6967	40.835	97.62	50
Cdk13:chr13:17804344	0.000151048	0.0103531	NA	NA	TRUE	missense_variant	p.Q103R	c.308A>G	protein_coding	Cdk13	cyclin-dependent kinase 13	-	tolerated_low_confidence	ENSMUSG00000041297	0.0312897	0.0486655	-0.816113	0.00120515	-	84.16	86.5	78.2733	95.7667
Pja2:chr17:64282530	0.00336526	0.0820125	0.000157703	0.00124684	FALSE	3_prime_UTR_variant	-	c.*883A>G	protein_coding	Pja2	praja ring finger ubiquitin ligase 2	-	-	ENSMUSG00000024083	0.0192096	0.0325254	0.493077	0.103345	-	4.02	8.12667	0.573333	0
Brix1:chr15:10475012	0.000162988	0.0110355	NA	NA	FALSE	3_prime_UTR_variant	-	c.*1315A>G	protein_coding	Brix1	BRX1, biogenesis of ribosomes	-	-	ENSMUSG00000022247	0.0014774	0.00401701	-0.545545	0.161938	RLTR17B_Mm	7.145	0	2.08333	42.86
Cyfip2:chr11:46272643	0.000164359	0.0110355	NA	NA	TRUE	missense_variant	p.K320E	c.958A>G	protein_coding	Cyfip2	cytoplasmic FMR1 interacting protein 2	-	tolerated	ENSMUSG00000020340	0.0686451	0.0957689	0.6	0.416667	-	12.145	61.115	NA	NA
Cript:chr17:87025570	0.000177289	0.0117834	NA	NA	FALSE	5_prime_UTR_variant	-	c.-90A>G	protein_coding	Cript	cysteine-rich PDZ-binding protein	-	-	ENSMUSG00000024146	0.613651	0.64939	0.0550737	0.865014	-	0	16.9567	0	0
Sppl2a:chr2:126914937	0.000180603	0.0118837	NA	NA	TRUE	intron_variant	-	c.1102-1349A>G	protein_coding	Sppl2a	signal peptide peptidase like 2A	-	-	ENSMUSG00000027366	0.959728	0.963609	-0.8	0.333333	B1_Mus1	NA	NA	33.33	3.34
Lrrc8b:chr5:105481450	0.000184237	0.0119345	NA	NA	FALSE	missense_variant	p.Q554R	c.1661A>G	protein_coding	Lrrc8b	leucine rich repeat containing 8 family, member B	-	tolerated	ENSMUSG00000070639	0.2415	0.286038	0.171629	0.593787	-	17.8167	3.35333	13.0167	10.6967
Casp9:chr4:141814926	0.000185003	0.0119345	NA	NA	TRUE	3_prime_UTR_variant	-	c.*1239A>G	protein_coding	Casp9	caspase 9	-	-	ENSMUSG00000028914	0.000131933	0.000622087	-0.441915	0.173559	-	10.44	6.46667	7.01667	75
Smad5:chr13:56740213	0.0196675	0.231953	0.000186358	0.00141446	FALSE	3_prime_UTR_variant	-	c.*2735A>G	protein_coding	Smad5	SMAD family member 5	-	-	ENSMUSG00000021540	1.01798e-06	1.6207e-05	-0.522466	0.0813932	B1_Mus1	0	0	2.59333	5.84
Slc44a1:chr4:53565471	0.000189325	0.0120947	NA	NA	FALSE	intron_variant	-	c.1947+2250A>G	protein_coding	Slc44a1	solute carrier family 44, member 1	-	-	ENSMUSG00000028412	0.00922456	0.0178575	0.524476	0.0838846	-	4.65667	1.97	1.97	0.6
Sik1:chr17:31847095	0.000191628	0.0121241	NA	NA	FALSE	synonymous_variant	p.Q639=	c.1917A>G	protein_coding	Sik1	salt inducible kinase 1	-	-	ENSMUSG00000024042	0.0012164	0.00340684	-0.537456	0.0715255	-	1.90333	0.776667	0.13	0
Itm2a:chrX:107397642	0.000198246	0.0124234	NA	NA	FALSE	3_prime_UTR_variant	-	c.*249A>G	protein_coding	Itm2a	integral membrane protein 2A	-	-	ENSMUSG00000031239	0.0339324	0.0518025	-0.0629371	0.851682	-	0.99	1.47	1.99	1.89333
Arih1:chr9:59392371	0.000200348	0.0124367	NA	NA	FALSE	3_prime_UTR_variant	-	c.*923A>G	protein_coding	Arih1	ariadne RBR E3 ubiquitin protein ligase 1	-	-	ENSMUSG00000025234	0.208975	0.252328	0.590785	0.0431005	-	2.62	0.606667	0	0
Ebna1bp2:chr4:118627116	0.000203464	0.0125121	NA	NA	TRUE	3_prime_UTR_variant	-	c.*1246A>G	protein_coding	Ebna1bp2	EBNA1 binding protein 2	-	-	ENSMUSG00000028729	1.34535e-06	1.96527e-05	-0.887542	0.000609666	PB1D7	21.1567	1.96	28.61	83.33
Gpd1l:chr9:114904890	0.00021327	0.0129937	NA	NA	FALSE	missense_variant	p.K246R	c.737A>G	protein_coding	Gpd1l	glycerol-3-phosphate dehydrogenase 1-like	-	tolerated	ENSMUSG00000050627	1.02246e-06	1.6207e-05	0.330442	0.294153	-	3.35333	0	0	0
Dlat:chr9:50635363	0.000223095	0.0134534	NA	NA	FALSE	3_prime_UTR_variant	-	c.*1062A>G	protein_coding	Dlat	dihydrolipoamide S-acetyltransferase (E2 component of pyruvate dehydrogenase complex)	-	-	ENSMUSG00000000168	0.0011029	0.00312418	-0.294819	0.378807	-	0.813333	3.33333	0	16.235
Atox1:chr11:55461170	0.000225243	0.0134534	NA	NA	FALSE	5_prime_UTR_variant	-	c.-77A>G	protein_coding	Atox1	antioxidant 1 copper chaperone	-	-	ENSMUSG00000018585	0.928094	0.938168	0.466266	0.126535	-	4.44	11.2833	3.39	0
Mrpl51:chr6:125194686	0.00022695	0.0134534	NA	NA	FALSE	3_prime_UTR_variant	-	c.*1267A>G	protein_coding	Mrpl51	mitochondrial ribosomal protein L51	-	-	ENSMUSG00000030335	0.0179247	0.0306587	-0.617914	0.191094	B1_Mur4	7.145	15.48	62.5	0
Fmo2:chr1:162876951	0.0477498	0.344077	0.000232529	0.001665	FALSE	missense_variant	p.K462R	c.1385A>G	protein_coding	Fmo2	flavin containing monooxygenase 2	-	tolerated	ENSMUSG00000040170	0.850771	0.873036	0.284547	0.370044	-	1.14	0	0	3.59333
Oga:chr19:45757395	0.000236014	0.0137544	NA	NA	FALSE	intron_variant	-	c.2454+510A>G	protein_coding	Oga	meningioma expressed antigen 5 (hyaluronidase)	-	-	ENSMUSG00000025220	0.0134714	0.0244786	-0.347768	0.267997	B3	0	27.1567	2.77667	3.70333
St13:chr15:81399731	0.000237488	0.0137544	NA	NA	FALSE	5_prime_UTR_variant	-	c.-137A>G	protein_coding	St13	suppression of tumorigenicity 13	-	-	ENSMUSG00000022403	0.00638719	0.01304	-0.514528	0.105365	-	1.66667	0	0	10.99
Dtx3l:chr16:35926907	0.000238298	0.0137544	NA	NA	FALSE	3_prime_UTR_variant	-	c.*2392A>G	protein_coding	Dtx3l	deltex 3-like, E3 ubiquitin ligase	-	-	ENSMUSG00000049502	8.10012e-05	0.000447007	0.725137	0.00761729	ID_B1	0	0	0	3.44667
Spcs3:chr8:54521958	0.00479026	0.0988866	0.000245018	0.00168325	FALSE	3_prime_UTR_variant	-	c.*1305A>G	protein_coding	Spcs3	signal peptidase complex subunit 3 homolog (S. cerevisiae)	-	-	ENSMUSG00000054408	0.00064805	0.00203712	0.257011	0.420009	-	0	0	2.08	0
Cmpk2:chr12:26473831	0.000246034	0.0140455	NA	NA	FALSE	intron_variant	-	c.791-165A>G	protein_coding	Cmpk2	cytidine monophosphate (UMP-CMP) kinase 2, mitochondrial	-	-	ENSMUSG00000020638	8.62715e-07	1.56762e-05	-0.0512989	0.934713	MTD	NA	0	20	2.23667
Desi1:chr15:81993604	0.0143105	0.191857	0.000246222	0.00168325	FALSE	3_prime_UTR_variant	-	c.*1148A>G	protein_coding	Desi1	desumoylating isopeptidase 1	-	-	ENSMUSG00000022472	0.00273922	0.00656181	0.336997	0.284094	-	0	0	3.15	0.776667
C2cd2:chr16:97857347	0.00024761	0.0140455	NA	NA	FALSE	3_prime_UTR_variant	-	c.*2009A>G	protein_coding	C2cd2	C2 calcium-dependent domain containing 2	-	-	ENSMUSG00000045975	0.00020144	0.000824576	-0.4	0.225014	B1F	20.49	2.91	9.88667	30.18
Ppp1r16b:chr2:158762255	0.017372	0.217315	0.000251499	0.00168325	FALSE	3_prime_UTR_variant	-	c.*392A>G	protein_coding	Ppp1r16b	protein phosphatase 1, regulatory subunit 16B	-	-	ENSMUSG00000037754	3.88577e-05	0.000258473	-0.753066	0.00469389	-	1.17	0.55	0.71	4.49667
Dtx3l:chr16:35927277	0.0391663	0.316852	0.000252545	0.00168325	FALSE	3_prime_UTR_variant	-	c.*2022A>G	protein_coding	Dtx3l	deltex 3-like, E3 ubiquitin ligase	-	-	ENSMUSG00000049502	8.10012e-05	0.000447007	0.333552	0.289355	-	0.83	4.81	0	3.34667
Lipc:chr9:70852988	0.000255255	0.0143554	NA	NA	FALSE	intron_variant	-	c.86-29425A>G	protein_coding	Lipc	lipase, hepatic	-	-	ENSMUSG00000032207	0.281402	0.324527	NA	NA	-	86.1467	100	40	17.7767
Glmp:chr3:88328491	0.000261249	0.014568	NA	NA	FALSE	3_prime_UTR_variant	-	c.*123A>G	protein_coding	Glmp	glycosylated lysosomal membrane protein	-	-	ENSMUSG00000001418	3.47107e-06	4.10468e-05	0.750198	0.00494669	-	0.313333	1.10667	0.216667	0
Iqgap1:chr7:80712390	0.0331043	0.294563	0.000261559	0.00172629	TRUE	3_prime_UTR_variant	-	c.*1442A>G	protein_coding	Iqgap1	IQ motif containing GTPase activating protein 1	-	-	ENSMUSG00000030536	0.229446	0.273499	0.342657	0.276231	PB1D7	4.95667	7.50333	11.7033	12.8233
Ntan1:chr16:13819356	0.000263821	0.0145878	NA	NA	FALSE	start_lost	p.M1V	c.1A>G	protein_coding	Ntan1	N-terminal Asn amidase	-	deleterious	ENSMUSG00000022681	0.00283413	0.00673854	-0.101374	0.753912	-	0.23	0.273333	1.57	0
Gpr89:chr3:96871332	0.000267301	0.014657	NA	NA	FALSE	3_prime_UTR_variant	-	c.*56A>G	protein_coding	Gpr89	G protein-coupled receptor 89	-	-	ENSMUSG00000028096	0.000272311	0.00105115	0.624169	0.0300595	-	2.86	0	0	0
Arih2:chr9:108604159	0.0337409	0.295203	0.000269468	0.00176144	FALSE	3_prime_UTR_variant	-	c.*923A>G	protein_coding	Arih2	ariadne RBR E3 ubiquitin protein ligase 2	-	-	ENSMUSG00000064145	0.0014326	0.00392386	-0.312084	0.323372	-	0	9.98	1.90333	0
Tmem243:chr5:9101364	0.0377497	0.313232	0.000290219	0.00183563	FALSE	missense_variant	p.N16S	c.47A>G	protein_coding	Tmem243	transmembrane protein 243, mitochondrial	-	tolerated	ENSMUSG00000079659	0.973736	0.975044	0.0422546	0.896261	-	1.16	0.46	1.05	0
Igtp:chr11:58207012	0.00029038	0.0157909	NA	NA	FALSE	synonymous_variant	p.T336=	c.1008A>G	protein_coding	Igtp	interferon gamma induced GTPase	-	-	ENSMUSG00000078853	5.9048e-06	6.19588e-05	0.701967	0.0109333	-	0.143333	0.456667	0.5	1.82667
Taf9b:chrX:106219643	0.00203928	0.059769	0.000301184	0.00187376	FALSE	missense_variant	p.E40G	c.119A>G	protein_coding	Taf9b	TATA-box binding protein associated factor 9B	-	deleterious_low_confidence	ENSMUSG00000047242	0.000129291	0.000617449	0.5769	0.0631564	-	21.0233	5.16333	2.22333	0
Plec:chr15:76177238	0.000316379	0.0167104	NA	NA	FALSE	missense_variant	p.H3003R	c.9008A>G	protein_coding	Plec	plectin	-	tolerated	ENSMUSG00000022565	0.112773	0.148218	0.115624	0.734959	-	0	0	1.23333	5.605
Prxl2c:chr13:64290281	0.000316632	0.0167104	NA	NA	FALSE	3_prime_UTR_variant	-	c.*1820A>G	protein_coding	Prxl2c	AhpC/TSA antioxidant enzyme domain containing 1	-	-	ENSMUSG00000021482	0.000474608	0.00158945	0.709618	0.00973881	B1F	1.86333	0.163333	0.176667	0
Rcan3:chr4:135413567	0.000322162	0.0167104	NA	NA	TRUE	3_prime_UTR_variant	-	c.*2853A>G	protein_coding	Rcan3	regulator of calcineurin 3	-	-	ENSMUSG00000059713	0.0117175	0.0218238	-0.179322	0.59779	PB1D10	5.73667	6.95	1.01	37.5
Slc7a1:chr5:148331927	0.000322955	0.0167104	NA	NA	FALSE	3_prime_UTR_variant	-	c.*513A>G	protein_coding	Slc7a1	solute carrier family 7 (cationic amino acid transporter, y+ system), member 1	-	-	ENSMUSG00000041313	0.00054851	0.00179228	-0.693954	0.0178436	-	0.23	0.953333	0.98	7.7
Eapp:chr12:54671889	0.000323222	0.0167104	NA	NA	FALSE	3_prime_UTR_variant	-	c.*1694A>G	protein_coding	Eapp	E2F-associated phosphoprotein	-	-	ENSMUSG00000054302	0.0846675	0.114895	-0.426782	0.251957	B2_Mm1a	47.9167	77.75	85.835	75
Nras:chr3:103066090	0.000324236	0.0167104	NA	NA	TRUE	3_prime_UTR_variant	-	c.*1903A>G	protein_coding	Nras	neuroblastoma ras oncogene	-	-	ENSMUSG00000027852	0.278556	0.324257	-0.0559441	0.86898	PB1D10,B4A	59.18	60.8367	58.5233	41.34
Rara:chr11:98974491	0.00032577	0.0167104	NA	NA	FALSE	3_prime_UTR_variant	-	c.*854A>G	protein_coding	Rara	retinoic acid receptor, alpha	-	-	ENSMUSG00000037992	0.0235556	0.0386541	-0.143748	0.673269	-	6.37	0	3.03	23.66
Dnajc1:chr2:18215094	0.000327604	0.0167104	NA	NA	TRUE	3_prime_UTR_variant	-	c.*2163A>G	protein_coding	Dnajc1	DnaJ heat shock protein family (Hsp40) member C1	-	-	ENSMUSG00000026740	8.47527e-05	0.00046427	-0.8	0.333333	ORR1D2	56.82	NA	0	100
Lrrc57:chr2:120609353	0.0411872	0.323807	0.000331452	0.0020453	FALSE	5_prime_UTR_variant	-	c.-261A>G	protein_coding	Lrrc57	leucine rich repeat containing 57	-	-	ENSMUSG00000027286	0.00805753	0.0160935	0.366988	0.266911	-	25.2867	42.2233	1.85333	10
Tgfa:chr6:86200398	0.000331807	0.0167946	NA	NA	FALSE	intron_variant	-	c.40+4853A>G	protein_coding	Tgfa	transforming growth factor alpha	-	-	ENSMUSG00000029999	0.755087	0.783482	-0.5	1	B3	NA	NA	21.97	100
Zmat5:chr11:4704684	0.00674258	0.123928	0.000344314	0.00210754	FALSE	5_prime_UTR_variant	-	c.-65A>G	protein_coding	Zmat5	zinc finger, matrin type 5	-	-	ENSMUSG00000009076	0.102682	0.136604	-0.207019	0.518551	-	35.7767	4.23	10.5267	31.7667
U2surp:chr9:95461325	0.000361151	0.0181403	NA	NA	TRUE	3_prime_UTR_variant	-	c.*80A>G	protein_coding	U2surp	U2 snRNP-associated SURP domain containing	-	-	ENSMUSG00000032407	0.0825632	0.112449	0.290929	0.414778	-	3.08667	33.33	3.70333	3.03
Habp4:chr13:64185407	0.0231182	0.251033	0.000365424	0.00219175	FALSE	3_prime_UTR_variant	-	c.*78A>G	protein_coding	Habp4	hyaluronic acid binding protein 4	-	-	ENSMUSG00000021476	0.000113312	0.000564413	-0.50687	0.0926029	-	0.81	0.426667	0	4.94333
Alkbh6:chr7:30308811	0.0459237	0.338966	0.000369624	0.00219175	FALSE	5_prime_UTR_variant	-	c.-49A>G	protein_coding	Alkbh6	alkB homolog 6	-	-	ENSMUSG00000042831	0.433406	0.472058	-0.287785	0.364383	-	0	5.07667	0	4.73667
S100pbp:chr4:129149550	0.000370461	0.0184669	NA	NA	FALSE	3_prime_UTR_variant	-	c.*1400A>G	protein_coding	S100pbp	S100P binding protein	-	-	ENSMUSG00000040928	0.00383059	0.00870058	-0.371761	0.26026	-	1.85333	6.66667	4.76333	37.855
Akt1:chr12:112671643	0.000386028	0.0190982	NA	NA	FALSE	5_prime_UTR_variant	-	c.-82A>G	protein_coding	Akt1	thymoma viral proto-oncogene 1	-	-	ENSMUSG00000001729	0.0306598	0.0479631	0.350263	0.264344	-	3.32667	0.766667	0.666667	0.816667
Patl2:chr2:122149703	0.000395324	0.0194122	NA	NA	FALSE	intron_variant	-	c.-265-19548A>G	protein_coding	Patl2	protein associated with topoisomerase II homolog 2 (yeast)	-	-	ENSMUSG00000027233	0.281402	0.324527	0.774597	0.225403	-	40	0	NA	11.31
Tspan9:chr6:127962451	0.00274777	0.0726116	0.000405737	0.00236888	FALSE	3_prime_UTR_variant	-	c.*1977A>G	protein_coding	Tspan9	tetraspanin 9	-	-	ENSMUSG00000030352	0.0122768	0.0225277	-0.265734	0.403977	-	4.14	2.16667	2.16	6.07
Cul1:chr6:47498715	0.000410513	0.0198507	NA	NA	FALSE	intron_variant	-	c.483+1327A>G	protein_coding	Cul1	cullin 1	-	-	ENSMUSG00000029686	0.0338938	0.0518025	-0.647339	0.164625	B1_Mm	14	NA	9.52667	100
Rbbp4:chr4:129309920	0.020037	0.23451	0.000413086	0.0023778	TRUE	3_prime_UTR_variant	-	c.*172A>G	protein_coding	Rbbp4	retinoblastoma binding protein 4, chromatin remodeling factor	-	-	ENSMUSG00000057236	0.0117874	0.0218448	-0.356643	0.256013	-	29.5033	26.3333	32.46	36.74
Isoc1:chr18:58678262	0.000413903	0.0198507	NA	NA	FALSE	3_prime_UTR_variant	-	c.*351A>G	protein_coding	Isoc1	isochorismatase domain containing 1	-	-	ENSMUSG00000024601	0.0011351	0.00320322	0.211116	0.510119	(CAAA)n	4.75	0	0	0
Tecr:chr8:83594438	0.000419596	0.0198507	NA	NA	FALSE	5_prime_UTR_variant	-	c.-84A>G	protein_coding	Tecr	trans-2,3-enoyl-CoA reductase	-	-	ENSMUSG00000031708	0.00101451	0.00290697	0.668087	0.0175694	-	0.423333	2.49667	0.456667	0
Tspan14:chr14:40907014	0.000420507	0.0198507	NA	NA	FALSE	3_prime_UTR_variant	-	c.*1044A>G	protein_coding	Tspan14	tetraspanin 14	-	-	ENSMUSG00000037824	6.24102e-05	0.000371965	0.129825	0.68758	-	1.03333	0.8	3.78667	0.63
Smad5:chr13:56739811	0.000420968	0.0198507	NA	NA	FALSE	3_prime_UTR_variant	-	c.*2333A>G	protein_coding	Smad5	SMAD family member 5	-	-	ENSMUSG00000021540	1.01798e-06	1.6207e-05	0.744722	0.00545789	ID_B1	2.27	0	0.443333	0
Ebna1bp2:chr4:118627132	0.000422747	0.0198507	NA	NA	TRUE	3_prime_UTR_variant	-	c.*1262A>G	protein_coding	Ebna1bp2	EBNA1 binding protein 2	rs864261935	-	ENSMUSG00000028729	1.34535e-06	1.96527e-05	-0.225614	0.530833	PB1D7	8.57	26.58	52.65	16.67
Pqlc3:chr12:16989536	0.000425372	0.0198507	NA	NA	FALSE	3_prime_UTR_variant	-	c.*268A>G	protein_coding	Pqlc3	PQ loop repeat containing	-	-	ENSMUSG00000045679	0.00258002	0.00624062	0.0526462	0.877824	-	17.05	0	2.3	0
Sbno2:chr10:80075373	0.000431889	0.0200129	NA	NA	FALSE	intron_variant	-	c.268-2855A>G	protein_coding	Sbno2	strawberry notch 2	-	-	ENSMUSG00000035673	9.37993e-07	1.6207e-05	0.752674	0.00472788	-	0	0	0	3.08333
Slc30a4:chr2:122684135	0.000451334	0.0207677	NA	NA	FALSE	3_prime_UTR_variant	-	c.*1044A>G	protein_coding	Slc30a4	solute carrier family 30 (zinc transporter), member 4	-	-	ENSMUSG00000005802	0.00504993	0.0109191	-0.783349	0.00434396	-	0	0	1.45	5.88
Arsb:chr13:93942286	0.00219949	0.0615894	0.000452967	0.00254142	TRUE	3_prime_UTR_variant	-	c.*1555A>G	protein_coding	Arsb	arylsulfatase B	-	-	ENSMUSG00000042082	2.63627e-05	0.000196402	-0.294819	0.378807	-	1.83333	0	0	7.095
Ccdc97:chr7:25712924	0.00046229	0.0211241	NA	NA	FALSE	3_prime_UTR_variant	-	c.*69A>G	protein_coding	Ccdc97	coiled-coil domain containing 97	-	-	ENSMUSG00000002608	0.000778937	0.00231198	-0.0642526	0.842745	-	0	3.63	0	0
Cds2:chr2:132309692	0.000468397	0.0212555	NA	NA	FALSE	3_prime_UTR_variant	-	c.*4407A>G	protein_coding	Cds2	CDP-diacylglycerol synthase (phosphatidate cytidylyltransferase) 2	-	-	ENSMUSG00000058793	6.52768e-06	6.66181e-05	-0.47406	0.140722	MIRb	1.07667	0	0	4.5
Cnot6l:chr5:96077111	0.000480113	0.0216166	NA	NA	FALSE	3_prime_UTR_variant	-	c.*69A>G	protein_coding	Cnot6l	CCR4-NOT transcription complex, subunit 6-like	-	-	ENSMUSG00000034724	0.0972761	0.130578	0.202879	0.527132	-	0.58	2.19	6.85333	2.17667
Iqgap1:chr7:80712391	0.000485848	0.0216166	NA	NA	FALSE	3_prime_UTR_variant	-	c.*1441A>G	protein_coding	Iqgap1	IQ motif containing GTPase activating protein 1	-	-	ENSMUSG00000030536	0.229446	0.273499	0.253527	0.426556	PB1D7	1.76667	0	2.51333	1.85
Slc35e2:chr4:155621691	0.000486209	0.0216166	NA	NA	TRUE	3_prime_UTR_variant	-	c.*2942A>G	protein_coding	Slc35e2	solute carrier family 35, member E2	-	-	ENSMUSG00000042202	0.0231904	0.0381388	0.374352	0.408058	B3	6.06	4.76333	62.5	NA
Khdc4:chr3:88688583	0.000491032	0.0216845	NA	NA	FALSE	intron_variant	-	c.262-592A>G	protein_coding	Khdc4	KH domain containing 4, pre-mRNA splicing factor	-	-	ENSMUSG00000028060	4.73053e-06	5.26007e-05	0.5	0.45	B3	22.145	60	80	0
Gm20696:chr6:99306671	0.000508337	0.0222747	NA	NA	TRUE	intron_variant	-	c.*354+1673A>G	nonsense_mediated_decay	Gm20696	predicted gene 20696	-	-	ENSMUSG00000030068	0.0028676	0.0067821	-0.592999	0.160522	B2_Mm1t	9.19	26.665	0	NA
Ece1:chr4:137964902	0.000512752	0.0222747	NA	NA	FALSE	3_prime_UTR_variant	-	c.*1996A>G	protein_coding	Ece1	endothelin converting enzyme 1	-	-	ENSMUSG00000057530	0.629451	0.663283	-0.0629371	0.851682	-	0.743333	2.57333	0.953333	0.673333
Fkbp15:chr4:62344276	0.00566059	0.10974	0.000514492	0.00279266	TRUE	intron_variant	-	c.321+1232A>G	protein_coding	Fkbp15	FK506 binding protein 15	-	-	ENSMUSG00000066151	0.000177161	0.000771841	-0.0375183	0.918044	B3	4.16667	47.5	12.32	0
Bpgm:chr6:34504850	0.000514552	0.0222747	NA	NA	FALSE	3_prime_UTR_variant	-	c.*401A>G	protein_coding	Bpgm	2,3-bisphosphoglycerate mutase	-	-	ENSMUSG00000038871	4.32678e-05	0.0002803	0.0211273	0.948038	-	1.34667	2.55333	7.30333	1.04
Hsbp1:chr8:119344525	0.00396227	0.0886794	0.000541527	0.0028945	FALSE	5_prime_UTR_variant	-	c.-51A>G	protein_coding	Hsbp1	heat shock factor binding protein 1	-	-	ENSMUSG00000031839	0.0405811	0.0604658	-0.027972	0.938663	-	2.87333	1.47	0.996667	4.55667
Arhgap29:chr3:121975621	0.000545307	0.0234518	NA	NA	FALSE	intron_variant	-	c.205+1506A>G	protein_coding	Arhgap29	Rho GTPase activating protein 29	-	-	ENSMUSG00000039831	3.8113e-06	4.4366e-05	0.706188	0.116807	B1_Mur4	29.6267	0	3.125	NA
Cxcl12:chr6:117180521	0.0096553	0.152902	0.00055078	0.00290999	FALSE	3_prime_UTR_variant	-	c.*4342A>G	protein_coding	Cxcl12	chemokine (C-X-C motif) ligand 12	-	-	ENSMUSG00000061353	4.32715e-06	4.95958e-05	-0.531469	0.0793029	-	5.96667	6.97667	6.24333	9.31667
Kif5b:chr18:6201433	0.000552558	0.0235156	NA	NA	TRUE	3_prime_UTR_variant	-	c.*2293A>G	protein_coding	Kif5b	kinesin family member 5B	-	-	ENSMUSG00000006740	0.0782853	0.107014	-0.341158	0.277812	-	2.44	0	0	16.6667
Pxdc1:chr13:34639021	0.00055394	0.0235156	NA	NA	FALSE	missense_variant	p.S112G	c.334A>G	protein_coding	Pxdc1	PX domain containing 1	-	tolerated_low_confidence	ENSMUSG00000021411	6.73629e-07	1.35636e-05	-0.326301	0.300609	-	2.03667	0	0.23	0.736667
Leprot:chr4:101658240	0.0279495	0.275238	0.000561412	0.0029387	FALSE	3_prime_UTR_variant	-	c.*286A>G	protein_coding	Leprot	leptin receptor overlapping transcript	-	-	ENSMUSG00000035212	0.00843633	0.0166713	-0.307692	0.330863	-	1.14667	1.49333	1.13667	3.65667
Cbfb:chr8:105216437	0.00056236	0.0237201	NA	NA	FALSE	3_prime_UTR_variant	-	c.*465A>G	protein_coding	Cbfb	core binding factor beta	-	-	ENSMUSG00000031885	0.147686	0.188078	0.442319	0.149915	-	0.936667	1.49667	5.00333	0
Tacc2:chr7:130678917	0.0005829	0.0244298	NA	NA	FALSE	intron_variant	-	c.5519+4178A>G	protein_coding	Tacc2	transforming, acidic coiled-coil containing protein 2	-	-	ENSMUSG00000030852	0.179215	0.223179	-0.2	0.916667	B2_Mm2	50	30	19.445	NA
Trim12a:chr7:104312697	0.0102984	0.156137	0.000587717	0.00301404	FALSE	intron_variant	-	c.-57+2714A>G	protein_coding	Trim12a	tripartite motif-containing 12A	-	-	ENSMUSG00000066258	0.296288	0.340639	-0.290909	0.386435	B1_Mus1	21.7467	46.635	39.0367	8.68667
Ccni:chr5:93189584	0.00618655	0.117652	0.000610285	0.00306759	FALSE	missense_variant	p.R75G	c.223A>G	protein_coding	Ccni	cyclin I	-	deleterious	ENSMUSG00000063015	6.98979e-05	0.000410031	0.594406	0.0457531	-	7.81667	11.21	13.1233	9.20667
Atxn7l3b:chr10:112928201	0.000647401	0.0268602	NA	NA	FALSE	3_prime_UTR_variant	-	c.*228A>G	protein_coding	Atxn7l3b	ataxin 7-like 3B	-	-	ENSMUSG00000074748	0.00587581	0.0122963	-0.493077	0.103345	-	0.25	3.74	0	5.6
Zfp46:chr4:136288505	0.000649054	0.0268602	NA	NA	FALSE	intron_variant	-	c.106+1190A>G	protein_coding	Zfp46	zinc finger protein 46	-	-	ENSMUSG00000051351	6.83951e-06	6.88572e-05	-0.796819	0.0319282	B3A	NA	40	6.66667	0
Map4k2:chr19:6341755	0.0423271	0.327277	0.000652895	0.00319708	FALSE	missense_variant	p.S56G	c.166A>G	protein_coding	Map4k2	mitogen-activated protein kinase kinase kinase kinase 2	-	tolerated	ENSMUSG00000024948	0.0573979	0.0820132	0.245467	0.441895	-	0	1.53333	0.643333	0
Arl5a:chr2:52401434	0.000682323	0.0280605	NA	NA	FALSE	3_prime_UTR_variant	-	c.*950A>G	protein_coding	Arl5a	ADP-ribosylation factor-like 5A	-	-	ENSMUSG00000036093	3.16309e-05	0.000222312	-0.463286	0.151251	-	0.37	0	2.3	13.635
Cpd:chr11:76781837	0.000698028	0.0285281	NA	NA	TRUE	3_prime_UTR_variant	-	c.*347A>G	protein_coding	Cpd	carboxypeptidase D	-	-	ENSMUSG00000020841	0.0223919	0.0371536	0.321678	0.308312	-	15.9067	8.77667	21.3633	6.99
Mapk1ip1l:chr14:47319973	0.00217616	0.0614556	0.00070491	0.00337364	TRUE	3_prime_UTR_variant	-	c.*550A>G	protein_coding	Mapk1ip1l	mitogen-activated protein kinase 1 interacting protein 1-like	-	-	ENSMUSG00000021840	0.010189	0.0193643	-0.3	0.371068	-	74.59	66.57	82.1033	86.815
Pecam1:chr11:106688168	0.00493025	0.101062	0.00070673	0.00337364	TRUE	intron_variant	-	c.1459+608A>G	protein_coding	Pecam1	platelet/endothelial cell adhesion molecule 1	-	-	ENSMUSG00000020717	0.000766052	0.002292	0	1	B3	30.03	62.5	23.54	17.7867
Zdhhc17:chr10:110943032	0.00802251	0.136757	0.000713933	0.00338672	FALSE	3_prime_UTR_variant	-	c.*1361A>G	protein_coding	Zdhhc17	zinc finger, DHHC domain containing 17	-	-	ENSMUSG00000035798	0.000149527	0.000675139	0.271717	0.418938	-	0	18.32	0	0
Gch1:chr14:47155050	0.000726802	0.0295207	NA	NA	FALSE	3_prime_UTR_variant	-	c.*748A>G	protein_coding	Gch1	GTP cyclohydrolase 1	-	-	ENSMUSG00000037580	0.00175555	0.00457861	0.734266	0.0090521	-	3.35667	5.95	8.63	11.2
Wasl:chr6:24615584	0.0108575	0.160906	0.000742355	0.00349967	FALSE	3_prime_UTR_variant	-	c.*701A>G	protein_coding	Wasl	Wiskott-Aldrich syndrome-like (human)	-	-	ENSMUSG00000029684	0.00222424	0.00552354	0.315877	0.344001	-	0	0	3.54667	1.065
Dcaf10:chr4:45377514	0.000744428	0.0300511	NA	NA	TRUE	3_prime_UTR_variant	-	c.*3237A>G	protein_coding	Dcaf10	DDB1 and CUL4 associated factor 10	-	-	ENSMUSG00000035572	0.000718247	0.00220203	-0.718185	0.171795	B1_Mur1	11.26	16.67	40	NA
Phc2:chr4:128752199	0.00294163	0.0750229	0.000749551	0.00351179	FALSE	3_prime_UTR_variant	-	c.*545A>G	protein_coding	Phc2	polyhomeotic 2	-	-	ENSMUSG00000028796	0.390375	0.43144	-0.111888	0.732775	-	19.3967	17.01	18.45	23.14
Cpne3:chr4:19520059	0.000788632	0.0316415	NA	NA	FALSE	3_prime_UTR_variant	-	c.*3125A>G	protein_coding	Cpne3	copine III	-	-	ENSMUSG00000028228	4.64075e-06	5.23842e-05	0.27043	0.395258	-	0.41	0	4.44333	0
Xpnpep3:chr15:81453974	0.000798807	0.0317884	NA	NA	FALSE	3_prime_UTR_variant	-	c.*943A>G	protein_coding	Xpnpep3	X-prolyl aminopeptidase 3, mitochondrial	-	-	ENSMUSG00000022401	1.20769e-06	1.79945e-05	-0.0965581	0.777621	-	11.1133	35.0367	10.41	8.335
Zbtb6:chr2:37425939	0.000801957	0.0317884	NA	NA	TRUE	3_prime_UTR_variant	-	c.*2704A>G	protein_coding	Zbtb6	zinc finger and BTB domain containing 6	-	-	ENSMUSG00000066798	0.00879071	0.0172344	0.607143	0.166667	B1F2	62.07	43.055	25	NA
C2cd2:chr16:97857320	0.000817211	0.0321991	NA	NA	FALSE	3_prime_UTR_variant	-	c.*2036A>G	protein_coding	C2cd2	C2 calcium-dependent domain containing 2	-	-	ENSMUSG00000045975	0.00020144	0.000824576	-0.376163	0.254212	B1F	4.87333	0.776667	13.57	20.08
Akap1:chr11:88844538	0.000886482	0.0347205	NA	NA	FALSE	missense_variant	p.S433G	c.1297A>G	protein_coding	Akap1	A kinase (PRKA) anchor protein 1	-	tolerated	ENSMUSG00000018428	0.000356136	0.00131347	0.470274	0.122871	-	1.04	9.37667	0.853333	0
Agfg1:chr1:82900092	0.000912213	0.0355169	NA	NA	FALSE	3_prime_UTR_variant	-	c.*5034A>G	protein_coding	Agfg1	ArfGAP with FG repeats 1	-	-	ENSMUSG00000026159	0.000137239	0.000639019	-0.875409	0.000191117	RLTR17B_Mm	0.953333	4.76333	4.62667	23.0967
Map1s:chr8:70906002	0.000923221	0.0357341	NA	NA	FALSE	5_prime_UTR_variant	-	c.-2A>G	protein_coding	Map1s	microtubule-associated protein 1S	-	-	ENSMUSG00000019261	0.0141686	0.0254352	-0.068543	0.850765	-	9.76667	0	0	20
Dffa:chr4:149118754	0.0131459	0.181341	0.000949168	0.00416427	TRUE	intron_variant	-	c.784-325A>G	protein_coding	Dffa	DNA fragmentation factor, alpha subunit	-	-	ENSMUSG00000028974	0.0102687	0.0194168	-0.0306772	0.932957	B1_Mm	55.6767	94.4433	68.75	37.5
Parg:chr14:32296625	0.00616199	0.117524	0.000978047	0.00424127	TRUE	3_prime_UTR_variant	-	c.*305A>G	protein_coding	Parg	poly (ADP-ribose) glycohydrolase	-	-	ENSMUSG00000021911	0.0171837	0.0298411	-0.788157	0.00395619	-	61.7333	51.11	79.1567	78.235
Lmna:chr3:88481874	0.00513384	0.104405	0.000982671	0.00424127	FALSE	3_prime_UTR_variant	-	c.*200A>G	protein_coding	Lmna	lamin A	-	-	ENSMUSG00000028063	0.287424	0.33096	0.468531	0.127473	-	3.08	11.3667	13.2933	19.04
Rbm41:chrX:139943564	0.00104653	0.0402698	NA	NA	TRUE	3_prime_UTR_variant	-	c.*2173A>G	protein_coding	Rbm41	RNA binding motif protein 41	-	-	ENSMUSG00000031433	0.00185463	0.00473185	-0.303468	0.364302	B3A	15.28	69.0467	11.1767	5
Rnf11:chr4:109454050	0.00105751	0.0404561	NA	NA	TRUE	3_prime_UTR_variant	-	c.*201A>G	protein_coding	Rnf11	ring finger protein 11	-	-	ENSMUSG00000028557	0.00895234	0.0174594	0.447552	0.147205	-	5.16	5.87	2.28333	4.31333
Znfx1:chr2:167046245	0.00108203	0.0411545	NA	NA	TRUE	intron_variant	-	c.2395+647A>G	protein_coding	Znfx1	zinc finger, NFX1-type containing 1	-	-	ENSMUSG00000039501	0.000268108	0.00104031	-0.0900937	0.847672	B1_Mur2	16.665	100	0	13.32
Car5b:chrX:163976927	0.00110163	0.0416594	NA	NA	TRUE	3_prime_UTR_variant	-	c.*2264A>G	protein_coding	Car5b	carbonic anhydrase 5b, mitochondrial	-	-	ENSMUSG00000031373	0.120752	0.157542	-0.9	0.0833333	B1_Mus1	73.335	20	72.73	60
Aig1:chr10:13868788	0.00165786	0.052955	0.00110544	0.00458547	FALSE	5_prime_UTR_variant	-	c.-30A>G	protein_coding	Aig1	androgen-induced 1	-	-	ENSMUSG00000019806	0.204476	0.248507	-0.167955	0.60183	-	0.776667	2.34	12.7	0
Scamp2:chr9:57588138	0.00181114	0.0560946	0.00110559	0.00458547	FALSE	3_prime_UTR_variant	-	c.*582A>G	protein_coding	Scamp2	secretory carrier membrane protein 2	-	-	ENSMUSG00000040188	0.112805	0.148218	0.346761	0.269479	-	2.99	8.82	2.04333	2.09
Zfp933:chr4:147823258	0.00112618	0.0421304	NA	NA	TRUE	3_prime_UTR_variant	-	c.*2473A>G	protein_coding	Zfp933	zinc finger protein 933	-	-	ENSMUSG00000059423	0.325346	0.36696	0.5	1	B1_Mus2	60	NA	15.555	NA
4930453N24Rik:chr16:64762672	0.00112689	0.0421304	NA	NA	FALSE	3_prime_UTR_variant	-	c.*3641A>G	protein_coding	4930453N24Rik	RIKEN cDNA 4930453N24 gene	-	-	ENSMUSG00000059920	0.00195603	0.0049566	0.8	0.333333	B1_Mus2	54.55	NA	20.835	50
Lrrc32:chr7:98501026	0.00119409	0.0443903	NA	NA	FALSE	3_prime_UTR_variant	-	c.*1020A>G	protein_coding	Lrrc32	leucine rich repeat containing 32	-	-	ENSMUSG00000090958	0.00185325	0.00473185	0.395797	0.202808	-	1.92667	4.2	5.57667	4.92
Smu1:chr4:40757869	0.0147771	0.195641	0.00120627	0.00489604	FALSE	5_prime_UTR_variant	-	c.-67A>G	protein_coding	Smu1	smu-1 suppressor of mec-8 and unc-52 homolog (C. elegans)	-	-	ENSMUSG00000028409	0.000553425	0.00180044	0.266668	0.40212	-	31.7	5.13333	28.24	15.2767
Ggps1:chr13:14053445	0.00122128	0.0451461	NA	NA	FALSE	3_prime_UTR_variant	-	c.*249A>G	protein_coding	Ggps1	geranylgeranyl diphosphate synthase 1	-	-	ENSMUSG00000021302	0.0602532	0.0853396	0.314685	0.319472	B2_Mm1a	14.7167	20.3933	29.1033	13.2467
Kansl3:chr1:36366300	0.0337422	0.295203	0.00124079	0.00500937	TRUE	intron_variant	-	c.216-648A>G	protein_coding	Kansl3	KAT8 regulatory NSL complex subunit 3	-	-	ENSMUSG00000010453	0.139943	0.179445	-0.29123	0.358409	B3A	12.0367	8.58667	12.2233	48.1833
Ndufs1:chr1:63176686	0.00125229	0.045798	NA	NA	FALSE	5_prime_UTR_variant	-	c.-106A>G	protein_coding	Ndufs1	NADH:ubiquinone oxidoreductase core subunit S1	-	-	ENSMUSG00000025968	0.00073452	0.00222514	0.545397	0.162075	-	4.73667	13.81	0	0
Cdkal1:chr13:29550797	0.00125283	0.045798	NA	NA	TRUE	intron_variant	-	c.906+1432A>G	protein_coding	Cdkal1	CDK5 regulatory subunit associated protein 1-like 1	-	-	ENSMUSG00000006191	0.0256383	0.041165	0.316228	0.683772	B3A	53.3333	NA	20	NA
Nckap1:chr2:80569307	0.00126009	0.0458087	NA	NA	FALSE	intron_variant	-	c.237+812A>G	protein_coding	Nckap1	NCK-associated protein 1	-	-	ENSMUSG00000027002	0.0572644	0.0820132	-0.337449	0.3403	B1_Mm	5.92667	2.77667	19.3133	20
Tmem234:chr4:129607763	0.00854654	0.140943	0.0012667	0.00508692	TRUE	3_prime_UTR_variant	-	c.*213A>G	protein_coding	Tmem234	transmembrane protein 234	-	-	ENSMUSG00000028797	0.096322	0.129531	-0.0605078	0.851819	B1_Mus2	0.486667	2.14	0.276667	0.36
Tspan2:chr3:102771031	0.00128042	0.046262	NA	NA	FALSE	3_prime_UTR_variant	-	c.*2089A>G	protein_coding	Tspan2	tetraspanin 2	-	-	ENSMUSG00000027858	0.363925	0.405268	0.28845	0.38967	-	5.82667	2.77667	26.19	5.88
Ggcx:chr6:72430515	0.0322401	0.292204	0.00129388	0.00514166	FALSE	3_prime_UTR_variant	-	c.*359A>G	protein_coding	Ggcx	gamma-glutamyl carboxylase	-	-	ENSMUSG00000053460	0.00480788	0.010566	-0.403874	0.192906	B1_Mus2	0.653333	0	0	4.78333
Fis1:chr5:136962100	0.00129399	0.046262	NA	NA	FALSE	5_prime_UTR_variant	-	c.-84A>G	protein_coding	Fis1	fission, mitochondrial 1	-	-	ENSMUSG00000019054	0.396781	0.436635	-0.0843597	0.794353	-	16.5767	5.47	5.05333	15.0167
Myadm:chr7:3292607	0.00129756	0.046262	NA	NA	FALSE	intron_variant	-	c.-91-596A>G	protein_coding	Myadm	myeloid-associated differentiation marker	-	-	ENSMUSG00000068566	0.358109	0.399987	0	1	B1_Mus2	NA	33.75	4.545	NA
Lemd2:chr17:27203743	0.00130068	0.046262	NA	NA	FALSE	missense_variant	p.S226G	c.676A>G	protein_coding	Lemd2	LEM domain containing 2	-	deleterious	ENSMUSG00000044857	0.00057993	0.00185428	-0.109172	0.735559	-	0	1.30667	5.04	0.953333
Sdf4:chr4:156010670	0.00131921	0.0466688	NA	NA	FALSE	3_prime_UTR_variant	-	c.*720A>G	protein_coding	Sdf4	stromal cell derived factor 4	-	-	ENSMUSG00000029076	0.000242937	0.000962703	0.387341	0.239216	B1_Mur4	4.56	0	0	0
Cnppd1:chr1:75136268	0.00133434	0.0469515	NA	NA	FALSE	3_prime_UTR_variant	-	c.*131A>G	protein_coding	Cnppd1	cyclin Pas1/PHO80 domain containing 1	-	-	ENSMUSG00000033159	1.49964e-07	5.58615e-06	0.130632	0.685727	-	1.02	0	3.21333	0.463333
Ndufb7:chr8:83571624	0.00135602	0.0474608	NA	NA	FALSE	3_prime_UTR_variant	-	c.*59A>G	protein_coding	Ndufb7	NADH:ubiquinone oxidoreductase subunit B7	-	-	ENSMUSG00000033938	0.978327	0.978327	0.253788	0.426064	-	7.09333	0	0	1.51667
Lin37:chr7:30559636	0.00138979	0.0483852	NA	NA	FALSE	5_prime_UTR_variant	-	c.-161A>G	protein_coding	Lin37	lin-37 homolog (C. elegans)	-	-	ENSMUSG00000036845	0.000104094	0.000538542	0.0289886	0.956529	-	4.64667	18.335	0	NA
Cbx3:chr6:51470669	0.00140008	0.0484869	NA	NA	FALSE	5_prime_UTR_variant	-	c.-100A>G	protein_coding	Cbx3	chromobox 3	-	-	ENSMUSG00000029836	9.88634e-06	8.66508e-05	0.404624	0.217065	-	2.10333	13.25	2.72333	4.545
Stom:chr2:35315406	0.00144075	0.0496341	NA	NA	TRUE	3_prime_UTR_variant	-	c.*455A>G	protein_coding	Stom	stomatin	-	-	ENSMUSG00000026880	0.127332	0.164406	-0.573427	0.0554813	-	3.36667	3.92	4.29333	2.02
Tspan14:chr14:40907013	0.00145113	0.0497314	NA	NA	FALSE	3_prime_UTR_variant	-	c.*1045A>G	protein_coding	Tspan14	tetraspanin 14	-	-	ENSMUSG00000037824	6.24102e-05	0.000371965	0.34965	0.266004	-	0.973333	1.33333	3.32	0.48
Rasal2:chr1:157409288	0.00925861	0.148228	0.00145656	0.00561184	TRUE	intron_variant	-	c.202+2449A>G	protein_coding	Rasal2	RAS protein activator like 2	-	-	ENSMUSG00000070565	0.321991	0.364565	-0.0303588	0.954476	B1_Mur1	54.55	0	31.25	NA
Itprip:chr19:47919250	0.00149001	0.0505374	0.00285899	0.00968737	FALSE	5_prime_UTR_variant	-	c.-138A>G	protein_coding	Itprip	NA	-	-	ENSMUSG00000117975	NA	NA	NA	NA	-	15.7833	4.76333	0	0
Clic4:chr4:135237947	0.00149804	0.0505491	0.022027	0.0405789	FALSE	intron_variant	-	c.182+915A>G	protein_coding	Clic4	chloride intracellular channel 4 (mitochondrial)	-	-	ENSMUSG00000037242	0.00401592	0.00906624	0.35505	0.314052	B3	13.64	0	1.66667	3.98
Dctn5:chr7:122133069	0.00163307	0.0529341	0.00158118	0.00603073	FALSE	5_prime_UTR_variant	-	c.-65A>G	protein_coding	Dctn5	dynactin 5	-	-	ENSMUSG00000030868	0.000141739	0.000655873	0.183579	0.567918	-	0	10.1433	0	0
Atxn3:chr12:101921632	0.0091746	0.147963	0.00164193	0.00620014	TRUE	3_prime_UTR_variant	-	c.*1475A>G	protein_coding	Atxn3	ataxin 3	-	-	ENSMUSG00000021189	0.00612643	0.0127491	-0.147136	0.665949	ID4	10.6833	8.33333	13.65	41.925
Rbpms:chr8:33783842	0.00178591	0.0559586	0.00658247	0.018368	FALSE	3_prime_UTR_variant	-	c.*351A>G	protein_coding	Rbpms	RNA binding protein gene with multiple splicing	-	-	ENSMUSG00000031586	0.00908484	0.0176716	-0.165221	0.607841	-	2.19333	0	0	0
Eif4g2:chr7:111072543	0.00974209	0.152902	0.00182337	0.00675091	FALSE	3_prime_UTR_variant	-	c.*149A>G	protein_coding	Eif4g2	eukaryotic translation initiation factor 4, gamma 2	-	-	ENSMUSG00000005610	0.0202296	0.0340204	-0.321678	0.308312	-	0.366667	0.36	0.95	0.973333
H2-T24:chr17:36006477	0.00406458	0.090104	0.00184635	0.00680281	FALSE	3_prime_UTR_variant	-	c.*259A>G	protein_coding	H2-T24	histocompatibility 2, T region locus 24	-	-	ENSMUSG00000053835	0.0519173	0.0752498	0.20979	0.513513	B2_Mm1a	2.73	5.13667	8.81333	1.79
Golt1b:chr6:142401922	0.0131952	0.18164	0.0018602	0.00682074	FALSE	3_prime_UTR_variant	-	c.*341A>G	protein_coding	Golt1b	golgi transport 1B	-	-	ENSMUSG00000030245	0.211683	0.255185	-0.406824	0.189365	-	0.616667	1.71	0.693333	8.72667
Pin1:chr9:20652115	0.00188789	0.0576892	0.00309463	0.0101917	FALSE	5_prime_UTR_variant	-	c.-25A>G	protein_coding	Pin1	protein (peptidyl-prolyl cis/trans isomerase) NIMA-interacting 1	-	-	ENSMUSG00000032171	1.08025e-05	9.2504e-05	-0.218846	0.543551	-	17.2733	17.17	54.85	62.5
Ndufa7:chr17:33824618	0.00237233	0.0650413	0.00191337	0.00697078	FALSE	5_prime_UTR_variant	-	c.-12A>G	protein_coding	Ndufa7	NADH:ubiquinone oxidoreductase subunit A7	-	-	ENSMUSG00000041881	0.86349	0.882441	0.409808	0.185824	-	2.74333	2.67333	1.05333	0.603333
Ppp1r15b:chr1:133137534	0.0231284	0.251033	0.00193507	0.00697078	TRUE	3_prime_UTR_variant	-	c.*647A>G	protein_coding	Ppp1r15b	protein phosphatase 1, regulatory subunit 15B	-	-	ENSMUSG00000046062	0.00524769	0.0112021	0.41958	0.176577	ID4_	4.08667	8.23667	9.38667	2.3
Aqp11:chr7:97736701	0.00196382	0.0587361	0.00507116	0.0146352	FALSE	intron_variant	-	c.619+668A>G	protein_coding	Aqp11	aquaporin 11	-	-	ENSMUSG00000042797	0.00679438	0.0137924	0.15	0.708069	B1_Mus1	70.4867	66.63	41.4467	NA
Lrrc58:chr16:37882715	0.00199863	0.0590869	0.0127448	0.0275011	FALSE	3_prime_UTR_variant	-	c.*1253A>G	protein_coding	Lrrc58	leucine rich repeat containing 58	-	-	ENSMUSG00000034158	0.004653	0.0103477	0.484062	0.110797	-	2.06667	0	1.34	0.676667
Pan3:chr5:147546917	0.0447283	0.336906	0.00200774	0.00715435	FALSE	3_prime_UTR_variant	-	c.*530A>G	protein_coding	Pan3	PAN3 poly(A) specific ribonuclease subunit	-	-	ENSMUSG00000029647	0.0438698	0.0645908	-0.367158	0.24038	-	0	0	1.39	5.92667
Hmgcs2:chr3:98310433	0.00244644	0.0662452	0.00207489	0.00735908	FALSE	3_prime_UTR_variant	-	c.*1409A>G	protein_coding	Hmgcs2	3-hydroxy-3-methylglutaryl-Coenzyme A synthase 2	-	-	ENSMUSG00000027875	2.18087e-05	0.000165733	-0.241307	0.449914	-	0	0	2.17667	0.723333
Malt1:chr18:65477091	0.00542617	0.107543	0.00212051	0.00748588	TRUE	3_prime_UTR_variant	-	c.*666A>G	protein_coding	Malt1	MALT1 paracaspase	-	-	ENSMUSG00000032688	0.0545674	0.0788937	-0.181818	0.595219	B3A	32.4767	16.2033	27.4233	61.23
Gpx1:chr9:108339283	0.0105724	0.158696	0.00229571	0.00795631	FALSE	5_prime_UTR_variant	-	c.-30A>G	protein_coding	Gpx1	glutathione peroxidase 1	-	-	ENSMUSG00000063856	0.0135971	0.024587	0.755245	0.00659654	-	9.08	7.47667	9.27	11.13
Mxd4:chr5:34177139	0.0043325	0.0932159	0.00229706	0.00795631	FALSE	missense_variant	p.I161M	c.483A>G	protein_coding	Mxd4	Max dimerization protein 4	-	deleterious	ENSMUSG00000037235	0.708921	0.740738	-0.471843	0.121455	-	0.943333	0.803333	0.103333	2.07
Cog4:chr8:110852400	0.0334327	0.294993	0.00230618	0.00795631	FALSE	missense_variant	p.I158V	c.472A>G	protein_coding	Cog4	component of oligomeric golgi complex 4	-	tolerated	ENSMUSG00000031753	0.000128708	0.000617449	-0.367158	0.24038	-	0.38	0	0	2.41667
Slc44a1:chr4:53565533	0.00235046	0.0647501	0.00679104	0.0186266	TRUE	intron_variant	-	c.1947+2312A>G	protein_coding	Slc44a1	solute carrier family 44, member 1	-	-	ENSMUSG00000028412	0.00922456	0.0178575	0.503497	0.0987516	(TATATG)n	21.1333	24.2233	20.8633	8.39
Rab3d:chr9:21907835	0.0126852	0.17822	0.00289018	0.00974954	TRUE	3_prime_UTR_variant	-	c.*2649A>G	protein_coding	Rab3d	RAB3D, member RAS oncogene family	-	-	ENSMUSG00000019066	5.36905e-05	0.000330574	-0.163636	0.656721	B1_Mur3	12.53	33.28	20.9333	0
Slc44a1:chr4:53567211	0.0226023	0.248701	0.00309094	0.0101917	FALSE	intron_variant	-	c.1947+3990A>G	protein_coding	Slc44a1	solute carrier family 44, member 1	-	-	ENSMUSG00000028412	0.00922456	0.0178575	0.854642	0.000398308	-	2.23	3.01333	0.966667	0.186667
Stat6:chr10:127660632	0.0790508	0.409893	0.00310182	0.0101917	FALSE	3_prime_UTR_variant	-	c.*651A>G	protein_coding	Stat6	signal transducer and activator of transcription 6	-	-	ENSMUSG00000002147	0.00687599	0.0139201	0.166776	0.604419	-	1.18667	0.206667	0	2.24667
Canx:chr11:50295141	0.00320254	0.0794879	0.0274574	0.0481297	TRUE	3_prime_UTR_variant	-	c.*1141A>G	protein_coding	Canx	calnexin	-	-	ENSMUSG00000020368	0.032235	0.049618	-0.27972	0.378709	-	1.45667	0.346667	1.33333	1.62
Acox1:chr11:116173271	0.011504	0.166723	0.00327993	0.0105935	FALSE	3_prime_UTR_variant	-	c.*277A>G	protein_coding	Acox1	acyl-Coenzyme A oxidase 1, palmitoyl	-	-	ENSMUSG00000020777	0.0100773	0.0192009	-0.311734	0.323944	-	3.3	3.44	2.75	0.413333
Proser2:chr2:6130099	0.0403288	0.320941	0.00344659	0.0110378	FALSE	5_prime_UTR_variant	-	c.-141A>G	protein_coding	Proser2	proline and serine rich 2	-	-	ENSMUSG00000045319	0.00533843	0.0113632	-0.486484	0.108761	-	0	0	0.346667	1.29
Pmpca:chr2:26396532	0.00347933	0.0838608	0.0151612	0.0312699	FALSE	3_prime_UTR_variant	-	c.*944A>G	protein_coding	Pmpca	peptidase (mitochondrial processing) alpha	-	-	ENSMUSG00000026926	7.41339e-05	0.000424844	-0.124768	0.699238	B1_Mus2	0	2.18333	1.42667	0
Surf1:chr2:26916343	0.0132548	0.18208	0.00357092	0.0113403	FALSE	5_prime_UTR_variant	-	c.-12A>G	protein_coding	Surf1	surfeit gene 1	-	-	ENSMUSG00000015790	0.0682158	0.0953485	-0.43509	0.15748	-	10.7233	3.13667	8.57333	27.65
Cavin1:chr11:100957958	0.00374122	0.0863762	0.00407876	0.0125845	FALSE	3_prime_UTR_variant	-	c.*666A>G	protein_coding	Cavin1	caveolae associated 1	-	-	ENSMUSG00000004044	5.02823e-06	5.44178e-05	-0.643357	0.0279546	-	0.603333	0.71	1.58667	1.15667
Tmem41b:chr7:109974646	0.0173322	0.217231	0.00382602	0.0119998	FALSE	3_prime_UTR_variant	-	c.*136A>G	protein_coding	Tmem41b	transmembrane protein 41B	-	-	ENSMUSG00000047554	0.00623825	0.0128739	0.110147	0.733271	-	0	0	3.88333	0
Foxq1:chr13:31558325	0.00386581	0.0884195	0.0103662	0.0239876	FALSE	5_prime_UTR_variant	-	c.-592A>G	protein_coding	Foxq1	forkhead box Q1	-	-	ENSMUSG00000038415	0.0228857	0.0377209	-0.556352	0.0603	-	0.96	0.31	0.626667	3.35
Lamtor3:chr3:137918561	0.0433322	0.331622	0.00391892	0.0121407	FALSE	5_prime_UTR_variant	-	c.-140A>G	protein_coding	Lamtor3	late endosomal/lysosomal adaptor, MAPK and MTOR activator 3	-	-	ENSMUSG00000091512	0.192703	0.237688	-0.0821113	0.799735	-	4.40667	1.19	0	6.82
Mknk2:chr10:80671983	0.0206642	0.237711	0.00411474	0.0126441	FALSE	synonymous_variant	p.L28=	c.84A>G	protein_coding	Mknk2	MAP kinase-interacting serine/threonine kinase 2	-	-	ENSMUSG00000020190	9.67643e-07	1.6207e-05	-0.458947	0.133409	-	0	0	0.366667	2.64
Bicd2:chr13:49385833	0.0227443	0.249429	0.00428341	0.0130044	FALSE	3_prime_UTR_variant	-	c.*2481A>G	protein_coding	Bicd2	BICD cargo adaptor 2	-	-	ENSMUSG00000037933	0.00669126	0.0136202	0.331013	0.293268	-	2.67667	11.2833	3.21	0.876667
Abr:chr11:76463619	0.00429374	0.0932159	0.00460361	0.0137565	FALSE	missense_variant	p.Q280R	c.839A>G	protein_coding	Abr	active BCR-related gene	-	tolerated	ENSMUSG00000017631	0.0063753	0.01304	0.246539	0.43984	-	0.83	0.81	2.73333	0
Thsd1:chr8:22261005	0.00952627	0.151775	0.00433206	0.0130997	FALSE	3_prime_UTR_variant	-	c.*1335A>G	protein_coding	Thsd1	thrombospondin, type I, domain 1	-	-	ENSMUSG00000031480	7.32685e-06	7.18224e-05	-0.45184	0.140313	-	10.2833	13.31	4.49	25.13
Lef1:chr3:131129367	0.00435018	0.0932159	0.0222516	0.0408933	FALSE	intron_variant	-	c.408+13821A>G	protein_coding	Lef1	lymphoid enhancer binding factor 1	-	-	ENSMUSG00000027985	0.000884082	0.00258712	0.454857	0.186565	B3	3.92	0	25.895	0
Rnf11:chr4:109454026	0.00441714	0.0940609	0.0072173	0.0190206	FALSE	3_prime_UTR_variant	-	c.*225A>G	protein_coding	Rnf11	ring finger protein 11	-	-	ENSMUSG00000028557	0.00895234	0.0174594	-0.65035	0.0259115	-	2.17333	1.38333	2.23667	4.41
Mfap1a:chr2:121492795	0.00522066	0.105052	0.00725859	0.0190632	TRUE	3_prime_UTR_variant	-	c.*1870A>G	protein_coding	Mfap1a	microfibrillar-associated protein 1A	-	-	ENSMUSG00000068479	3.14219e-08	1.98237e-06	0.436631	0.155849	B3,B1_Mus1	25.0733	30.8433	13.07	0
Hnrnpc:chr14:52073736	0.00546631	0.108013	0.00692958	0.0188269	TRUE	3_prime_UTR_variant	-	c.*1344A>G	protein_coding	Hnrnpc	heterogeneous nuclear ribonucleoprotein C	-	-	ENSMUSG00000060373	0.196099	0.241078	-0.447552	0.147205	-	12.93	5.16667	7.80333	9.54
Prxl2c:chr13:64290161	0.00562857	0.109579	0.0120752	0.0265042	TRUE	3_prime_UTR_variant	-	c.*1940A>G	protein_coding	Prxl2c	AhpC/TSA antioxidant enzyme domain containing 1	-	-	ENSMUSG00000021482	0.000474608	0.00158945	-0.440559	0.154216	PB1D9	7.01	4.36	9.43667	9.84667
Tor2a:chr2:32761903	0.0333684	0.294993	0.00592158	0.0167705	FALSE	3_prime_UTR_variant	-	c.*163A>G	protein_coding	Tor2a	torsin family 2, member A	-	-	ENSMUSG00000009563	0.00458679	0.0102617	0.183579	0.567918	-	0	2.35333	0.563333	0
Got2:chr8:95864967	0.00925263	0.148228	0.00649635	0.0181946	TRUE	3_prime_UTR_variant	-	c.*162A>G	protein_coding	Got2	glutamatic-oxaloacetic transaminase 2, mitochondrial	-	-	ENSMUSG00000031672	0.00055742	0.00180555	-0.34965	0.266004	-	3.21333	1.12	2.71667	6.49667
Atf2:chr2:73892600	0.0100652	0.154015	0.00665505	0.0185025	FALSE	5_prime_UTR_variant	-	c.-319A>G	protein_coding	Atf2	activating transcription factor 2	-	-	ENSMUSG00000027104	0.000379322	0.00136149	0.357994	0.2797	-	15.3533	0	0	4.165
Ecm2:chr13:49531954	0.0232304	0.251033	0.00669281	0.0185276	FALSE	3_prime_UTR_variant	-	c.*523A>G	protein_coding	Ecm2	extracellular matrix protein 2, female organ and adipocyte specific	-	-	ENSMUSG00000043631	0.00199286	0.00499892	0	1	L1MC4a	8.22	0	0	10.4167
Fam181b:chr7:93081562	0.0299881	0.282695	0.00679785	0.0186266	FALSE	3_prime_UTR_variant	-	c.*387A>G	protein_coding	Fam181b	family with sequence similarity 181, member B	-	-	ENSMUSG00000051515	0.000251265	0.000990437	-0.195542	0.542489	-	0.156667	0.333333	0	2.74333
Polr3f:chr2:144539899	0.0109262	0.161199	0.00699044	0.0188817	TRUE	3_prime_UTR_variant	-	c.*1210A>G	protein_coding	Polr3f	polymerase (RNA) III (DNA directed) polypeptide F	-	-	ENSMUSG00000027427	0.000223219	0.000903796	0.0181818	0.967576	B1_Mus1	33.7	23.25	43.3733	65.97
9330111N05Rik:chr13:81065147	0.00717903	0.130492	0.0234218	0.0424275	FALSE	intron_variant,non_coding_transcript_variant	-	n.1507-59443A>G	antisense	9330111N05Rik	RIKEN cDNA 9330111N05 gene	-	-	ENSMUSG00000097098	0.281402	0.324527	-0.311188	0.324838	-	93.7233	99.0467	99.2233	93.1033
Marchf2:chr17:33718644	0.00720069	0.130525	0.00819007	0.0207209	FALSE	5_prime_UTR_variant	-	c.-151A>G	protein_coding	Marchf2	membrane-associated ring finger (C3HC4) 2	-	-	ENSMUSG00000079557	0.000744967	0.00223791	-0.142371	0.658931	-	1.92333	0.953333	6.56	1.23333
Cdk13:chr13:17804365	0.00724171	0.130908	0.00920015	0.022168	TRUE	missense_variant	p.K96R	c.287A>G	protein_coding	Cdk13	cyclin-dependent kinase 13	rs864269032	tolerated_low_confidence	ENSMUSG00000041297	0.0312897	0.0486655	0.181818	0.572958	-	13.36	34.0267	29.7867	31.25
Ncl:chr1:86347928	0.0073259	0.13099	0.0163601	0.0327434	FALSE	3_prime_UTR_variant	-	c.*2692A>G	protein_coding	Ncl	nucleolin	-	-	ENSMUSG00000026234	0.419114	0.458425	0.2	0.783333	B1_Mur2	49.0467	NA	86.365	NA
Abtb1:chr6:88841858	0.0150407	0.197683	0.00736866	0.0191535	FALSE	5_prime_UTR_variant	-	c.-34A>G	protein_coding	Abtb1	ankyrin repeat and BTB (POZ) domain containing 1	-	-	ENSMUSG00000030083	0.000112249	0.000564413	0.137684	0.669587	-	12.3	0	0	0
Stard8:chrX:99074547	0.00746422	0.132742	0.00764118	0.0196975	TRUE	3_prime_UTR_variant	-	c.*1347A>G	protein_coding	Stard8	START domain containing 8	-	-	ENSMUSG00000031216	0.0017577	0.00457861	-0.290909	0.386435	RLTR17B_Mm	9.81333	19.5233	23.9633	42.725
Hipk1:chr3:103741711	0.00966773	0.152902	0.00750859	0.0194506	FALSE	3_prime_UTR_variant	-	c.*2237A>G	protein_coding	Hipk1	homeodomain interacting protein kinase 1	-	-	ENSMUSG00000008730	0.222599	0.265859	0.431699	0.184896	-	0.673333	0	1.33333	5.265
Gnb4:chr3:32584090	0.00785092	0.135233	0.0270595	0.0477632	FALSE	3_prime_UTR_variant	-	c.*1030A>G	protein_coding	Gnb4	guanine nucleotide binding protein (G protein), beta 4	-	-	ENSMUSG00000027669	0.0255704	0.041165	0.25219	0.429083	RLTR17B_Mm	25.79	29.45	24.8867	7.63667
Dclre1b:chr3:103800899	0.0080987	0.137482	0.010023	0.0235001	FALSE	3_prime_UTR_variant	-	c.*2069A>G	protein_coding	Dclre1b	DNA cross-link repair 1B	-	-	ENSMUSG00000027845	0.000734745	0.00222514	-0.362898	0.337112	-	40.74	0	27.775	30.525
Zc3h4:chr7:16436250	0.0470731	0.341124	0.00832291	0.0207799	FALSE	3_prime_UTR_variant	-	c.*740A>G	protein_coding	Zc3h4	zinc finger CCCH-type containing 4	-	-	ENSMUSG00000059273	0.19659	0.241284	-0.26619	0.402998	-	0	0	1.66667	7.90333
Tead2:chr7:45233473	0.0124746	0.176144	0.00835175	0.0207835	FALSE	3_prime_UTR_variant	-	c.*545A>G	protein_coding	Tead2	TEA domain family member 2	-	-	ENSMUSG00000030796	0.742337	0.773484	0.210528	0.511326	-	1.89	2.78	6.42	14.4433
Ssh1:chr5:113940651	0.0110204	0.161392	0.00930751	0.0223557	FALSE	3_prime_UTR_variant	-	c.*1588A>G	protein_coding	Ssh1	slingshot protein phosphatase 1	-	-	ENSMUSG00000042121	0.0432616	0.0639481	0.252709	0.428101	PB1D7	3.69	3.84667	13.9767	3.49
Mcc:chr18:44425993	0.0457378	0.338532	0.0108718	0.0249296	TRUE	3_prime_UTR_variant	-	c.*3894A>G	protein_coding	Mcc	mutated in colorectal cancers	-	-	ENSMUSG00000071856	0.00197626	0.0049909	-0.164223	0.610043	B1_Mm	2.91333	0	1.01	6.00333
Ahcyl1:chr3:107664387	0.0109508	0.1612	0.0263181	0.0465628	FALSE	3_prime_UTR_variant	-	c.*720A>G	protein_coding	Ahcyl1	S-adenosylhomocysteine hydrolase-like 1	-	-	ENSMUSG00000027893	0.0121094	0.0223858	-0.429588	0.163399	-	0.183333	1.25	2.02667	1.24
Ulk2:chr11:61854781	0.0261142	0.267234	0.0109992	0.0250056	FALSE	5_prime_UTR_variant	-	c.-205A>G	protein_coding	Ulk2	unc-51 like kinase 2	-	-	ENSMUSG00000004798	0.0291129	0.0458544	-0.257948	0.418255	-	0	1.02333	0	3.32
Ccnd2:chr6:127125380	0.0175911	0.219612	0.0110305	0.0250056	FALSE	3_prime_UTR_variant	-	c.*4955A>G	protein_coding	Ccnd2	cyclin D2	-	-	ENSMUSG00000000184	0.705603	0.738306	-0.0666671	0.836905	-	8.83	14.86	15.2533	3.12667
Apbb2:chr5:66541108	0.0980289	0.434364	0.0113829	0.0253362	FALSE	intron_variant	-	c.-166+2354A>G	protein_coding	Apbb2	amyloid beta (A4) precursor protein-binding, family B, member 2	-	-	ENSMUSG00000029207	0.222679	0.265859	-0.132566	0.681288	MTD	0.68	0	20.72	1.58667
Sppl2a:chr2:126891464	0.015016	0.197683	0.0123794	0.0269998	TRUE	3_prime_UTR_variant	-	c.*2748A>G	protein_coding	Sppl2a	signal peptide peptidase like 2A	-	-	ENSMUSG00000027366	0.959728	0.963609	-0.69697	0.0311411	B1_Mus2	87.43	92.46	87.23	62.205
Arf3:chr15:98737987	0.0131168	0.181341	0.0137177	0.029002	FALSE	3_prime_UTR_variant	-	c.*2346A>G	protein_coding	Arf3	ADP-ribosylation factor 3	-	-	ENSMUSG00000051853	0.000662202	0.00207033	-0.153846	0.63514	-	0.646667	1.60667	2.77	0.773333
Pdrg1:chr2:153009248	0.0266686	0.27164	0.0136614	0.029002	FALSE	3_prime_UTR_variant	-	c.*406A>G	protein_coding	Pdrg1	p53 and DNA damage regulated 1	-	-	ENSMUSG00000027472	0.00618286	0.0128307	0.401418	0.195884	-	1.65333	0.386667	2.22667	0.45
Dnase2a:chr8:84911198	0.0137525	0.186267	0.0163371	0.0327434	TRUE	3_prime_UTR_variant	-	c.*166A>G	protein_coding	Dnase2a	deoxyribonuclease II alpha	-	-	ENSMUSG00000003812	0.571842	0.610347	0.335314	0.286658	B1_Mus1	3.1	1.75333	14.7533	0
Sypl:chr12:32954220	0.0139418	0.188372	0.0226535	0.0413318	FALSE	intron_variant	-	c.52-68A>G	protein_coding	Sypl	synaptophysin-like protein	-	-	ENSMUSG00000020570	3.46473e-06	4.10468e-05	-0.605955	0.0367585	(CCCCG)n	3.88333	2.71333	2.50667	7.94333
Nf2:chr11:4767141	0.0376578	0.31303	0.0152962	0.0314629	TRUE	3_prime_UTR_variant	-	c.*1082A>G	protein_coding	Nf2	neurofibromin 2	-	-	ENSMUSG00000009073	0.137394	0.176785	0.0559441	0.86898	-	40.5333	37.9267	38.4567	47.5167
Pkn3:chr2:30090735	0.0404478	0.321433	0.0168074	0.033221	FALSE	stop_lost	p.*879Wext*15	c.2637A>G	protein_coding	Pkn3	protein kinase N3	-	-	ENSMUSG00000026785	0.641197	0.673788	-0.220295	0.491451	-	0	0.346667	0	1.36667
