# Supplementary material for: Dynamic A-to-I RNA editing during acute neuroinflammation in sepsis-associated encephalopathy
Source: Front Neurosci. 2024 Aug 2;18:1435185. doi: 10.3389/fnins.2024.1435185 (PMC11328407; doi:10.3389/fnins.2024.1435185)
Supplement: Supplementary file 11 [file Table_5.XLSX]

## Sheet: DE_optimized_genes
Table S5. Differential edited genes in microglia during acute neuroinflammation in SAE.
Gene
H2-K2
Slc39a14
Sbno2
Numa1
Dusp1
Mm2pr
Trim36
Psmb10
Cfap74
Ska2
Pcca
Dennd4a
Zdhhc13
Usp45
Gcnt2
Dffa
Naa15
Tomm6
Snta1
Lactb2
Cables1
Pigv
Rnf168
Nfkbia
Mid1
Atp6v0b
Mgat4a
Mfap1a
Cfap97
Tbc1d5
Cd83
Gm2a
C5ar2
Ets1
Ppp2r1b
Dnase2a
Cpne3
Tagap1
Cyp20a1
Wdr91
Cep68
Gna11
Efr3a
Scd2
Armh3
4933434E20Rik
Echs1
Ovca2
Tmem33
Ap3s2
Kcnk6
Plagl2
Rab6b
Slamf9
Pank3
Tmco4
Sec63
Nfkb1
Dnajc18
Fam160b1
Zfp36l2
Mfap3
Otud6b
Creb3l2
Tmppe
Fcgr2b
Traf5
Arf3
Sec62
Snx10
Serpine2
Ctss
Ggps1
Tpmt
Ube2l6
Atp6v0e
Pigm
Ptpa
Gm21985
Eif4e2
Gatc
Smug1
Utp6
