# Supplementary material for: Dynamic A-to-I RNA editing during acute neuroinflammation in sepsis-associated encephalopathy
Source: Front Neurosci. 2024 Aug 2;18:1435185. doi: 10.3389/fnins.2024.1435185 (PMC11328407; doi:10.3389/fnins.2024.1435185)
Supplement: Supplementary file 12 [file Table_6.XLSX]

## Sheet: DE_optimized_sites
Table S6. Differential A-to-I RNA editing events in microglia during acute neuroinflammation in SAE.
event_id	p.GLM	p.GLM.adj	p.fisher	p.fisher.adj	known_site	Consequence	AAchange	NTchange	BIOTYPE	SYMBOL	description	Existing_variation	SIFT	ensembl_gene_id	p.Gene.GLM	p.Gene.GLM.adj	r.spearman	p.spearman	Repeat	PBS	LPS_30_minutes	LPS_1_hours	LPS_2_hours
H2-K2:chr17:33975546	8.84118e-09	5.35599e-05	0.349653	0.705599	FALSE	non_coding_transcript_exon_variant	-	n.1097A>G	processed_transcript	H2-K2	histocompatibility 2, K region locus 2	-	-	ENSMUSG00000067203	5.94185e-05	0.00151967	NA	NA	-	0	0	0	1.64
Slc39a14:chr14:70305972	3.31368e-08	0.000100371	0.100941	0.468609	FALSE	3_prime_UTR_variant	-	c.*694A>G	protein_coding	Slc39a14	solute carrier family 39 (zinc transporter), member 14	-	-	ENSMUSG00000022094	0.003318	0.0222253	NA	NA	-	0	0	0	4.86
Sbno2:chr10:80075373	7.01069e-08	0.000102771	0.00234589	0.132956	FALSE	intron_variant	-	c.268-2855A>G	protein_coding	Sbno2	strawberry notch 2	-	-	ENSMUSG00000035673	6.61239e-06	0.000293729	NA	NA	-	0	0	0	8.06333
Numa1:chr7:101998398	7.06976e-08	0.000102771	0.00138849	0.103561	FALSE	synonymous_variant	p.E445=	c.1335A>G	protein_coding	Numa1	nuclear mitotic apparatus protein 1	-	-	ENSMUSG00000066306	0.0309728	0.0990189	-0.541558	0.0689754	-	0	0	1.40667	0
Dusp1:chr17:26508472	8.48221e-08	0.000102771	0.472114	0.768979	FALSE	5_prime_UTR_variant	-	c.-149A>G	protein_coding	Dusp1	dual specificity phosphatase 1	-	-	ENSMUSG00000024190	8.35139e-07	6.4078e-05	0.395077	0.203706	-	0	4.41667	1.89333	2.53
Mm2pr:chr5:149155758	1.06487e-07	0.000107517	0.0541239	0.407138	TRUE	intron_variant,non_coding_transcript_variant	-	n.67+26237A>G	lincRNA	Mm2pr	RIKEN cDNA 5730422E09 gene	-	-	ENSMUSG00000097191	0.395794	0.511563	-0.039772	0.919084	-	100	80.37	100	100
Trim36:chr18:46198631	3.38787e-07	0.000267347	0.000773919	0.0823206	FALSE	intron_variant	-	c.64-2323A>G	protein_coding	Trim36	tripartite motif-containing 36	-	-	ENSMUSG00000033949	0.000926989	0.00956176	-0.532379	0.07477	-	0	0	0	3.73
Psmb10:chr8:105938113	3.53049e-07	0.000267347	1.90557e-05	0.0189198	FALSE	5_prime_UTR_variant	-	c.-103A>G	protein_coding	Psmb10	proteasome (prosome, macropain) subunit, beta type 10	-	-	ENSMUSG00000031897	0.000474436	0.00625663	0.171931	0.593128	-	10.2233	18.76	1.07667	5.96333
Cfap74:chr4:155410297	8.55293e-07	0.000545097	0.100606	0.468492	TRUE	intron_variant	-	c.-20+727A>G	protein_coding	Cfap74	cilia and flagella associated protein 74	-	-	ENSMUSG00000078490	0.0716941	0.167641	0.323748	0.33144	B1_Mur3	0	9.63	0	0
Ska2:chr11:87123288	8.99797e-07	0.000545097	0.123077	0.493674	TRUE	3_prime_UTR_variant	-	c.*1289A>G	protein_coding	Ska2	spindle and kinetochore associated complex subunit 2	-	-	ENSMUSG00000020492	0.0487866	0.132398	-1	0.333333	B1_Mur1	21.825	NA	NA	60
Pcca:chr14:122737958	1.11035e-06	0.000611499	0.0042453	0.174041	FALSE	missense_variant	p.D563G	c.1688A>G	protein_coding	Pcca	propionyl-Coenzyme A carboxylase, alpha polypeptide	-	tolerated	ENSMUSG00000041650	0.285814	0.413338	0.00917895	0.977414	-	0	0	0	2.08
Dennd4a:chr9:64822599	1.26931e-06	0.00064079	0.0109222	0.237352	TRUE	intron_variant	-	c.-217+11013A>G	protein_coding	Dennd4a	DENN/MADD domain containing 4A	-	-	ENSMUSG00000053641	1.48731e-06	8.36862e-05	-0.126899	0.694318	B1_Mur1	2.87667	0	0.313333	0.516667
Zdhhc13:chr7:48789033	1.71623e-06	0.000799763	0.27691	0.661348	FALSE	5_prime_UTR_variant	-	c.-78A>G	protein_coding	Zdhhc13	zinc finger, DHHC domain containing 13	-	-	ENSMUSG00000030471	0.896431	0.921544	0.185312	0.690778	-	18.18	0	12.7	9.09
Usp45:chr4:21834549	2.01413e-06	0.000871544	0.365869	0.716219	TRUE	3_prime_UTR_variant	-	c.*184A>G	protein_coding	Usp45	ubiquitin specific petidase 45	-	-	ENSMUSG00000040455	0.651651	0.721776	0.1	0.95	PB1D9	22.22	61.25	42.86	40
Gcnt2:chr13:40917637	2.34835e-06	0.000948419	0.855562	0.942711	FALSE	intron_variant	-	c.920-35939A>G	protein_coding	Gcnt2	glucosaminyl (N-acetyl) transferase 2, I-branching enzyme	-	-	ENSMUSG00000021360	7.69749e-11	4.27255e-08	NA	NA	-	0	0	0	3.94667
Dffa:chr4:149118174	3.9082e-06	0.00147974	0.000125769	0.0413555	FALSE	intron_variant	-	c.783+251A>G	protein_coding	Dffa	DNA fragmentation factor, alpha subunit	-	-	ENSMUSG00000028974	0.400683	0.514729	-0.164624	0.609158	B1_Mur4	1.33333	8.94333	19.0467	30.6867
Naa15:chr3:51473583	4.51729e-06	0.00158505	0.0339716	0.353453	FALSE	3_prime_UTR_variant	-	c.*783A>G	protein_coding	Naa15	N(alpha)-acetyltransferase 15, NatA auxiliary subunit	-	-	ENSMUSG00000063273	0.395686	0.511563	0.431411	0.161423	-	0	0	4.05333	0
Tomm6:chr17:47688097	4.83687e-06	0.00158505	0.100478	0.468256	FALSE	5_prime_UTR_variant	-	c.-71A>G	protein_coding	Tomm6	translocase of outer mitochondrial membrane 6	-	-	ENSMUSG00000033475	0.282399	0.410939	0.5	1	-	NA	17.425	60	NA
Snta1:chr2:154400763	4.97127e-06	0.00158505	0.0141291	0.268542	TRUE	intron_variant	-	c.478+2959A>G	protein_coding	Snta1	syntrophin, acidic 1	-	-	ENSMUSG00000027488	0.0153716	0.0617285	NA	NA	B1_Mur1	0	11.6967	5.41	0
Lactb2:chr1:13626421	6.10379e-06	0.00184884	0.00619678	0.200557	FALSE	3_prime_UTR_variant	-	c.*440A>G	protein_coding	Lactb2	lactamase, beta 2	-	-	ENSMUSG00000025937	0.0447964	0.12555	0.216344	0.499448	ORR1B1	0.47	0	2.99667	0
Cables1:chr18:11944687	1.01195e-05	0.00291923	0.00129308	0.0992398	FALSE	3_prime_UTR_variant	-	c.*86A>G	protein_coding	Cables1	CDK5 and Abl enzyme substrate 1	-	-	ENSMUSG00000040957	3.89293e-06	0.000193272	-0.415503	0.179182	MamGypLTR2c	0.783333	0	1.58333	0.7
Pigv:chr4:133662209	1.27124e-05	0.00350054	0.000558708	0.0787778	TRUE	3_prime_UTR_variant	-	c.*301A>G	protein_coding	Pigv	phosphatidylinositol glycan anchor biosynthesis, class V	-	-	ENSMUSG00000043257	0.0381176	0.111319	NA	NA	B1_Mus1	1.88	0.546667	5.07333	0
Rnf168:chr16:32300005	1.5055e-05	0.00391643	0.051707	0.400383	FALSE	3_prime_UTR_variant	-	c.*679A>G	protein_coding	Rnf168	ring finger protein 168	-	-	ENSMUSG00000014074	0.0396873	0.113546	-0.678571	0.109524	-	0	14.85	50	38.095
Nfkbia:chr12:55492600	1.59287e-05	0.00391643	0.364033	0.716219	FALSE	5_prime_UTR_variant	-	c.-74A>G	protein_coding	Nfkbia	nuclear factor of kappa light polypeptide gene enhancer in B cells inhibitor, alpha	-	-	ENSMUSG00000021025	2.17494e-08	4.58911e-06	0.395217	0.332517	-	0	16.67	36.5633	36.9833
Mid1:chrX:169979148	1.61622e-05	0.00391643	0.00835997	0.214773	FALSE	intron_variant	-	c.864+2119A>G	protein_coding	Mid1	midline 1	-	-	ENSMUSG00000035299	0.000214273	0.00384779	-0.305348	0.361188	-	0	17.425	2.38	1.58667
Atp6v0b:chr4:117886450	1.68658e-05	0.00392973	0.122408	0.492473	FALSE	intron_variant	-	c.117-91A>G	protein_coding	Atp6v0b	ATPase, H+ transporting, lysosomal V0 subunit B	-	-	ENSMUSG00000033379	0.298996	0.422702	0.201546	0.529908	-	0	1.37333	2.36	0
Mgat4a:chr1:37443269	1.78301e-05	0.00400055	0.00275238	0.140214	FALSE	3_prime_UTR_variant	-	c.*1390A>G	protein_coding	Mgat4a	mannoside acetylglucosaminyltransferase 4, isoenzyme A	-	-	ENSMUSG00000026110	0.349256	0.470131	-0.328671	0.297385	-	0.726667	1.60667	2.8	4.62333
Mgat4a:chr1:37439589	2.33475e-05	0.00505139	0.00688451	0.202625	FALSE	3_prime_UTR_variant	-	c.*5070A>G	protein_coding	Mgat4a	mannoside acetylglucosaminyltransferase 4, isoenzyme A	-	-	ENSMUSG00000026110	0.349256	0.470131	-0.343258	0.274671	-	0.48	0.503333	1.78667	2.86
Mfap1a:chr2:121494044	2.66448e-05	0.00556601	0.00955848	0.218946	FALSE	3_prime_UTR_variant	-	c.*621A>G	protein_coding	Mfap1a	microfibrillar-associated protein 1A	-	-	ENSMUSG00000068479	0.00515122	0.0301919	-0.133135	0.679984	PB1D9	0	0.74	4.53	0
Cfap97:chr8:46193573	0.000817396	0.0582563	2.67841e-05	0.0189198	TRUE	3_prime_UTR_variant	-	c.*861A>G	protein_coding	Cfap97	cilia and flagella associated protein 97	-	-	ENSMUSG00000031631	0.566607	0.655989	-0.11951	0.711424	-	51.9033	22.3667	65.76	61.5233
Tbc1d5:chr17:50735514	2.87218e-05	0.00579989	0.00283541	0.14115	FALSE	3_prime_UTR_variant	-	c.*431A>G	protein_coding	Tbc1d5	TBC1 domain family, member 5	-	-	ENSMUSG00000023923	0.0166886	0.0658186	-0.0917895	0.77663	-	0	2.59667	0	0
Cd83:chr13:43785192	0.00228982	0.101385	3.12054e-05	0.0189198	FALSE	5_prime_UTR_variant	-	c.-22A>G	protein_coding	Cd83	CD83 antigen	-	-	ENSMUSG00000015396	1.8559e-05	0.000652658	NA	NA	-	4.73667	7.6	4.59333	2.02667
Gm2a:chr11:55110143	3.23696e-05	0.00632565	0.0578697	0.409971	FALSE	3_prime_UTR_variant	-	c.*610A>G	protein_coding	Gm2a	GM2 ganglioside activator protein	-	-	ENSMUSG00000000594	0.0756456	0.172554	0.06655	0.837188	-	1.83	2.17333	0.79	1.29333
C5ar2:chr7:16236438	0.00213133	0.0978152	3.47909e-05	0.0191761	TRUE	3_prime_UTR_variant	-	c.*486A>G	protein_coding	C5ar2	complement component 5a receptor 2	-	-	ENSMUSG00000074361	0.000272511	0.00459999	NA	NA	B4	29.1633	35.6067	29.9567	21.27
Ets1:chr9:32757206	3.77774e-05	0.00698603	0.0174777	0.289041	FALSE	3_prime_UTR_variant	-	c.*2781A>G	protein_coding	Ets1	E26 avian leukemia oncogene 1, 5' domain	-	-	ENSMUSG00000032035	0.943986	0.956452	-0.0211273	0.948038	-	2.19	0.286667	1.62667	0.43
Ppp2r1b:chr9:50881060	3.80553e-05	0.00698603	0.00201672	0.127368	FALSE	intron_variant	-	c.1789+1759A>G	protein_coding	Ppp2r1b	protein phosphatase 2, regulatory subunit A, beta	-	-	ENSMUSG00000032058	0.0270428	0.0912966	NA	NA	-	0	0	0.44	2.71333
Dnase2a:chr8:84911214	4.12006e-05	0.00722864	0.000424557	0.0734312	TRUE	3_prime_UTR_variant	-	c.*182A>G	protein_coding	Dnase2a	deoxyribonuclease II alpha	-	-	ENSMUSG00000003812	0.050748	0.135627	NA	NA	B1_Mus1	5.73333	8.39667	3.27	8.1
Cpne3:chr4:19522446	4.17634e-05	0.00722864	0.00969667	0.220191	FALSE	3_prime_UTR_variant	-	c.*738A>G	protein_coding	Cpne3	copine III	-	-	ENSMUSG00000028228	0.867976	0.901073	0.0183579	0.954843	-	0	0	2.00333	0
Tagap1:chr17:6956737	6.09757e-05	0.00972081	4.65259e-05	0.0235072	FALSE	missense_variant	p.T187A	c.559A>G	protein_coding	Tagap1	T cell activation GTPase activating protein 1	-	tolerated	ENSMUSG00000052031	0.00631118	0.0337129	NA	NA	-	3.01	1.04	6.11333	15.9367
Cyp20a1:chr1:60387825	4.71424e-05	0.00793301	0.00126582	0.0992398	FALSE	3_prime_UTR_variant	-	c.*536A>G	protein_coding	Cyp20a1	cytochrome P450, family 20, subfamily a, polypeptide 1	-	-	ENSMUSG00000049439	0.166942	0.291716	-0.228825	0.474383	B1_Mur4	0	0.793333	5.89	0
Wdr91:chr6:34908827	5.64322e-05	0.00923964	0.0181579	0.291086	TRUE	intron_variant	-	c.304-506A>G	protein_coding	Wdr91	WD repeat domain 91	-	-	ENSMUSG00000058486	0.000508079	0.00643627	NA	NA	ID_B1	37.62	25	0	83.33
Cep68:chr11:20228255	0.00229909	0.101385	6.32642e-05	0.0295055	FALSE	3_prime_UTR_variant	-	c.*1231A>G	protein_coding	Cep68	centrosomal protein 68	-	-	ENSMUSG00000044066	0.0178992	0.0692979	0.536584	0.0720754	B1_Mur4	1.79333	1.04333	5.19667	0
Gna11:chr10:81529923	7.03144e-05	0.0109222	0.181355	0.563009	FALSE	3_prime_UTR_variant	-	c.*872A>G	protein_coding	Gna11	guanine nucleotide binding protein, alpha 11	-	-	ENSMUSG00000034781	0.000473289	0.00625663	-0.559441	0.0627487	-	6.34667	4.44333	11.89	12.87
Efr3a:chr15:65873650	8.52612e-05	0.0129128	0.0272065	0.329095	FALSE	3_prime_UTR_variant	-	c.*2392A>G	protein_coding	Efr3a	EFR3 homolog A	-	-	ENSMUSG00000015002	0.000969544	0.00965523	-0.212183	0.507932	-	0	1.45	0.296667	0
Scd2:chr19:44305306	0.0678331	0.403663	8.99777e-05	0.0365543	FALSE	3_prime_UTR_variant	-	c.*2106A>G	protein_coding	Scd2	stearoyl-Coenzyme A desaturase 2	-	-	ENSMUSG00000025203	0.0560947	0.144955	NA	NA	-	0	1.06333	0	2.88
Armh3:chr19:45854211	0.00548106	0.151618	9.04361e-05	0.0365543	TRUE	intron_variant	-	c.1782-8025A>G	protein_coding	Armh3	armadillo-like helical domain containing 3	-	-	ENSMUSG00000039901	0.183461	0.308522	-0.286713	0.366408	B1_Mus1	33.4567	27.3133	8.42667	23.09
4933434E20Rik:chr3:90060394	9.65526e-05	0.0142662	0.000475794	0.0739677	TRUE	intron_variant	-	c.567-1244A>G	protein_coding	4933434E20Rik	RIKEN cDNA 4933434E20 gene	-	-	ENSMUSG00000027942	0.4263	0.537243	0.335314	0.286658	B2_Mm2	2.02667	8.63	0	0
Echs1:chr7:140116413	0.00010287	0.0147571	0.133611	0.510658	FALSE	5_prime_UTR_variant	-	c.-19A>G	protein_coding	Echs1	enoyl Coenzyme A hydratase, short chain, 1, mitochondrial	-	-	ENSMUSG00000025465	0.00805528	0.0399467	0.140849	0.662387	-	0	5.19667	7.39333	5.08667
Ovca2:chr11:75176318	0.000104747	0.0147571	0.00387337	0.166555	FALSE	3_prime_UTR_variant	-	c.*1576A>G	protein_coding	Ovca2	candidate tumor suppressor in ovarian cancer 2	-	-	ENSMUSG00000038268	0.77877	0.821602	0.201937	0.529093	B2_Mm2	3.64333	0	0	0
Tmem33:chr5:67286961	0.0490029	0.378109	0.000105526	0.0399879	FALSE	3_prime_UTR_variant	-	c.*736A>G	protein_coding	Tmem33	transmembrane protein 33	-	-	ENSMUSG00000037720	0.148667	0.272772	-0.311799	0.323838	-	0	5.98667	2.59667	1.22
Ap3s2:chr7:79879779	0.000114168	0.0157188	0.00921074	0.217461	FALSE	3_prime_UTR_variant	-	c.*705A>G	protein_coding	Ap3s2	adaptor-related protein complex 3, sigma 2 subunit	-	-	ENSMUSG00000063801	0.715782	0.768601	0.132855	0.680625	-	0	13.3333	0	6.06
Mgat4a:chr1:37443161	0.00012404	0.0166985	0.000724919	0.0799372	FALSE	3_prime_UTR_variant	-	c.*1498A>G	protein_coding	Mgat4a	mannoside acetylglucosaminyltransferase 4, isoenzyme A	-	-	ENSMUSG00000026110	0.349256	0.470131	-0.118881	0.716184	-	6.27667	8	7.64	14.1667
Kcnk6:chr7:29223099	0.000514757	0.0451942	0.000129598	0.0413555	FALSE	3_prime_UTR_variant	-	c.*1937A>G	protein_coding	Kcnk6	potassium inwardly-rectifying channel, subfamily K, member 6	-	-	ENSMUSG00000046410	0.0388912	0.112798	0.307692	0.330863	B1_Mur2	7.29	6.19667	4.72333	9.38667
Plagl2:chr2:153229494	0.000150544	0.019826	0.0287053	0.329621	FALSE	3_prime_UTR_variant	-	c.*1995A>G	protein_coding	Plagl2	pleiomorphic adenoma gene-like 2	-	-	ENSMUSG00000051413	0.179658	0.308271	0.300297	0.342937	-	0	0	1.33333	5.47333
Rab6b:chr9:103182182	0.000862502	0.0600333	0.000155215	0.0443316	FALSE	3_prime_UTR_variant	-	c.*936A>G	protein_coding	Rab6b	RAB6B, member RAS oncogene family	-	-	ENSMUSG00000032549	0.242234	0.370372	0.1744	0.587748	-	0	4.87333	0	0
Slamf9:chr1:172476375	0.00828155	0.185813	0.00016086	0.0443316	FALSE	missense_variant	p.S96G	c.286A>G	protein_coding	Slamf9	SLAM family member 9	-	deleterious	ENSMUSG00000026548	0.0469635	0.128692	-0.327454	0.298804	-	1.07333	1.58333	0	0.69
Pank3:chr11:35786846	0.000162464	0.0209406	0.0169499	0.284473	FALSE	3_prime_UTR_variant	-	c.*1388A>G	protein_coding	Pank3	pantothenate kinase 3	-	-	ENSMUSG00000018846	0.276706	0.404748	0.0124814	0.96929	B1_Mus2	0	1.39	9.65333	0
Tmco4:chr4:139053944	0.0513899	0.380357	0.000170192	0.044864	FALSE	missense_variant	p.Q473R	c.1418A>G	protein_coding	Tmco4	transmembrane and coiled-coil domains 4	-	tolerated	ENSMUSG00000041143	0.648557	0.720318	NA	NA	-	11.35	0	0	3.70333
Sec63:chr10:42815161	0.000179727	0.022683	0.016427	0.281645	FALSE	missense_variant	p.D594G	c.1781A>G	protein_coding	Sec63	SEC63-like (S. cerevisiae)	-	tolerated	ENSMUSG00000019802	0.524041	0.617724	-0.201937	0.529093	-	0	1.74333	0	0
Nfkb1:chr3:135584752	0.000184577	0.0227286	0.00420863	0.174041	FALSE	3_prime_UTR_variant	-	c.*603A>G	protein_coding	Nfkb1	nuclear factor of kappa light polypeptide gene enhancer in B cells 1, p105	-	-	ENSMUSG00000028163	0.234205	0.360614	-0.0275368	0.932302	-	0	0	12.75	0
Dnajc18:chr18:35672492	0.00490329	0.14705	0.000187189	0.0472885	TRUE	3_prime_UTR_variant	-	c.*2627A>G	protein_coding	Dnajc18	DnaJ heat shock protein family (Hsp40) member C18	-	-	ENSMUSG00000024350	0.135757	0.258643	NA	NA	B1_Mur3	12.8667	1.48	10.9933	16.12
Fam160b1:chr19:57387692	0.000187592	0.0227286	0.0855615	0.450312	FALSE	3_prime_UTR_variant	-	c.*1116A>G	protein_coding	Fam160b1	family with sequence similarity 160, member B1	-	-	ENSMUSG00000033478	0.00761626	0.0387236	NA	NA	-	2.22	6.03333	4.31	11.6367
Zfp36l2:chr17:84187946	0.00019412	0.0229702	0.0056528	0.198109	FALSE	5_prime_UTR_variant	-	c.-252A>G	protein_coding	Zfp36l2	zinc finger protein 36, C3H type-like 2	-	-	ENSMUSG00000045817	0.000641387	0.00731528	-0.328445	0.297257	-	15.2767	1.39	0	6.11
Mfap3:chr11:57533227	0.000197169	0.0229702	0.00548069	0.196624	FALSE	3_prime_UTR_variant	-	c.*2983A>G	protein_coding	Mfap3	microfibrillar-associated protein 3	-	-	ENSMUSG00000020522	0.0794693	0.178859	0.468531	0.127473	B1F1	6.82333	3.22667	5.39667	11.2567
Otud6b:chr4:14810642	0.000203914	0.0230722	0.00127356	0.0992398	FALSE	3_prime_UTR_variant	-	c.*1022A>G	protein_coding	Otud6b	OTU domain containing 6B	-	-	ENSMUSG00000040550	0.0974822	0.207242	-0.624169	0.0300595	-	0	6.64667	0	0
Creb3l2:chr6:37327559	0.000205662	0.0230722	0.0271238	0.329095	FALSE	3_prime_UTR_variant	-	c.*4866A>G	protein_coding	Creb3l2	cAMP responsive element binding protein 3-like 2	-	-	ENSMUSG00000038648	9.04378e-05	0.00212026	NA	NA	-	0.68	0.793333	0	4.89333
Tmppe:chr9:114406974	0.00031298	0.0313585	0.000208163	0.0504838	FALSE	3_prime_UTR_variant	-	c.*996A>G	protein_coding	Tmppe	transmembrane protein with metallophosphoesterase domain	-	-	ENSMUSG00000079260	0.223573	0.350466	0.238653	0.455066	-	0	5.10333	0	0
Fcgr2b:chr1:170960086	0.000218054	0.0240177	0.0319747	0.344551	FALSE	3_prime_UTR_variant	-	c.*928A>G	protein_coding	Fcgr2b	Fc receptor, IgG, low affinity IIb	-	-	ENSMUSG00000026656	0.000599358	0.00712476	0.679242	0.0151258	-	0	0	1.66667	0
Traf5:chr1:192062303	0.000247974	0.0268254	0.393518	0.728741	TRUE	intron_variant	-	c.378+339A>G	protein_coding	Traf5	TNF receptor-associated factor 5	-	-	ENSMUSG00000026637	0.0604802	0.150576	0	1	B1_Mur4	25	18.335	0	NA
Arf3:chr15:98737994	0.000261959	0.0278412	0.00645776	0.200731	FALSE	3_prime_UTR_variant	-	c.*2339A>G	protein_coding	Arf3	ADP-ribosylation factor 3	-	-	ENSMUSG00000051853	0.0123973	0.0528452	0.0559441	0.86898	-	2.48333	4.48667	6.14	2.07
Sec62:chr3:30793328	0.000283752	0.0293746	0.00168452	0.113481	FALSE	5_prime_UTR_variant	-	c.-20A>G	protein_coding	Sec62	SEC62 homolog (S. cerevisiae)	-	-	ENSMUSG00000027706	0.953801	0.964535	0.174825	0.58826	-	14.63	15.21	6.66	10.95
Snx10:chr6:51590466	0.000286085	0.0293746	0.0504433	0.398607	TRUE	3_prime_UTR_variant	-	c.*1504A>G	protein_coding	Snx10	sorting nexin 10	-	-	ENSMUSG00000038301	0.00807653	0.0399467	0.474953	0.118681	-	0	1.02	0.483333	2.61
Serpine2:chr1:79794495	0.000315759	0.0313585	0.000371669	0.0704197	TRUE	3_prime_UTR_variant	-	c.*510A>G	protein_coding	Serpine2	serine (or cysteine) peptidase inhibitor, clade E, member 2	rs13469720	-	ENSMUSG00000026249	0.0196505	0.0730225	-0.0979021	0.766288	-	11.8367	13.9667	16.96	15.4933
Ctss:chr3:95539851	0.000346048	0.0338123	0.0474589	0.393264	FALSE	intron_variant	-	c.276+1008A>G	protein_coding	Ctss	cathepsin S	-	-	ENSMUSG00000038642	0.00174572	0.01377	NA	NA	B2_Mm2	1.80667	5.52333	0	1.07667
Ggps1:chr13:14053256	0.000388742	0.0373809	0.0185306	0.291086	FALSE	3_prime_UTR_variant	-	c.*438A>G	protein_coding	Ggps1	geranylgeranyl diphosphate synthase 1	-	-	ENSMUSG00000021302	0.120602	0.2395	0.137295	0.670474	B3	0	0	2.83333	0.583333
Tpmt:chr13:47024152	0.000397182	0.0375958	0.0739172	0.438769	FALSE	3_prime_UTR_variant	-	c.*1213A>G	protein_coding	Tpmt	thiopurine methyltransferase	-	-	ENSMUSG00000021376	0.212111	0.339699	0.205832	0.657923	-	28.57	0	4.545	24.285
Ube2l6:chr2:84809630	0.00041818	0.0389744	0.0445323	0.387162	FALSE	3_prime_UTR_variant	-	c.*474A>G	protein_coding	Ube2l6	ubiquitin-conjugating enzyme E2L 6	-	-	ENSMUSG00000027078	0.298587	0.422702	0.445169	0.146998	LTRIS2	0	0	1.72333	0.08
Atp6v0e:chr17:26676434	0.000450148	0.0413182	0.40179	0.734858	FALSE	5_prime_UTR_variant	-	c.-41A>G	protein_coding	Atp6v0e	ATPase, H+ transporting, lysosomal V0 subunit E	-	-	ENSMUSG00000015575	0.0957004	0.205003	-0.367776	0.239528	-	2.52667	1.34667	0.74	1.37667
Pigm:chr1:172381891	0.000461336	0.0417131	0.125409	0.496933	FALSE	3_prime_UTR_variant	-	c.*3921A>G	protein_coding	Pigm	phosphatidylinositol glycan anchor biosynthesis, class M	-	-	ENSMUSG00000050229	0.101022	0.212411	0.439372	0.176339	RLTR22_Mus	12.75	0	0	0
Ptpa:chr2:30446738	0.000507948	0.0451942	0.0392636	0.367369	FALSE	3_prime_UTR_variant	-	c.*284A>G	protein_coding	Ptpa	protein phosphatase 2 protein activator	-	-	ENSMUSG00000039515	0.000179178	0.00360063	-0.343112	0.274889	-	0	0	1.84	1.01
Gm21985:chr2:112355507	0.000573474	0.0496301	0.018545	0.291086	TRUE	intron_variant	-	c.2757+363A>G	nonsense_mediated_decay	Gm21985	predicted gene 21985	-	-	ENSMUSG00000096764	NA	NA	NA	NA	B1_Mus2	34.31	11.5467	2.22333	14.0233
Eif4e2:chr1:87226122	0.000587393	0.0498445	0.0046994	0.180332	FALSE	missense_variant	p.K185R	c.554A>G	protein_coding	Eif4e2	eukaryotic translation initiation factor 4E member 2	-	tolerated	ENSMUSG00000026254	0.202593	0.330071	-0.03899	0.904242	-	0.573333	1.17667	0	0
Gatc:chr5:115341162	0.000600039	0.0498445	0.0637156	0.419176	FALSE	5_prime_UTR_variant	-	c.-13A>G	protein_coding	Gatc	glutamyl-tRNA(Gln) amidotransferase, subunit C	-	-	ENSMUSG00000029536	0.0184089	0.0706234	-0.458735	0.182361	-	23.3333	21.43	3.33333	31.665
Smug1:chr15:103154784	0.000601895	0.0498445	0.0314704	0.343294	FALSE	3_prime_UTR_variant	-	c.*869A>G	protein_coding	Smug1	single-strand selective monofunctional uracil DNA glycosylase	-	-	ENSMUSG00000036061	0.000928986	0.00956176	0.173155	0.590459	B1_Mus2	8.88667	5.41	8.68333	34.0733
Utp6:chr11:79935822	0.000608863	0.0498445	0.0964917	0.46394	FALSE	3_prime_UTR_variant	-	c.*133A>G	protein_coding	Utp6	UTP6 small subunit processome component	-	-	ENSMUSG00000035575	0.189295	0.314498	-0.067022	0.836047	-	4.33333	0.506667	4.23667	1.73333
