# Supplementary material for: Dynamic A-to-I RNA editing during acute neuroinflammation in sepsis-associated encephalopathy
Source: Front Neurosci. 2024 Aug 2;18:1435185. doi: 10.3389/fnins.2024.1435185 (PMC11328407; doi:10.3389/fnins.2024.1435185)
Supplement: Supplementary file 13 [file Table_7.XLSX]

## Sheet: Sheet1
Table S7. A-to-I RNA editing events in cerebral vessels significantly correlated with Adar expression.
Differential RNA editing event	gene expression	Spearman r	Spearman P
Snhg11:chr2:158384953	Adar	0.91769	2.58817e-05
Ppp1r13b:chr12:111828992	Adar	0.896939	7.68463e-05
Spock2:chr10:60132527	Adar	0.895105	8.36659e-05
Npdc1:chr2:25406980	Adar	-0.884639	0.00013218
Lamp2:chrX:38420503	Adar	0.872024	0.000217238
Apod:chr16:31296708	Adar	0.862885	0.000301821
Capza2:chr6:17665568	Adar	0.858145	0.000354759
Lamp2:chrX:38420328	Adar	0.847109	0.000506007
Atp1a1:chr3:101576396	Adar	-0.842184	0.00058779
Lrrc32:chr7:98501026	Adar	0.835093	0.000723093
Gm29650:chrY:1048551	Adar	0.832168	0.000785442
Maml1:chr11:50256133	Adar	0.826588	0.000915842
Rab27a:chr9:73097260	Adar	-0.822476	0.00102215
Hadh:chr3:131233769	Adar	-0.819379	0.00110835
Fastk:chr5:24444806	Adar	0.818182	0.00114311
Zyg11b:chr4:108232672	Adar	-0.81738	0.00116685
Slc39a10:chr1:46808220	Adar	0.816556	0.00119165
Pcp4l1:chr1:171173815	Adar	-0.811189	0.00136332
4930453N24Rik:chr16:64762345	Adar	0.810992	0.00136996
Sox7:chr14:63949691	Adar	0.810992	0.00136996
Haus2:chr2:120620270	Adar	-0.8109	0.00137305
Nrxn1:chr17:90859020	Adar	-0.807023	0.00150918
Ebna1bp2:chr4:118626126	Adar	-0.804196	0.00161477
Spock2:chr10:60133920	Adar	0.802103	0.00169653
Plin3:chr17:56279604	Adar	-0.798808	0.00183163
Mapk6:chr9:75387201	Adar	0.790487	0.00220958
Lin37:chr7:30556118	Adar	0.79021	0.00222314
Pcdh19:chrX:133583477	Adar	0.786327	0.00241956
Ptprb:chr10:116389119	Adar	0.783217	0.00258621
Ccn3:chr15:54753094	Adar	0.783123	0.00259138
Ankfy1:chr11:72768290	Adar	0.782166	0.00264443
Tmem252:chr19:24679154	Adar	0.782166	0.00264443
Septin2:chr1:93509108	Adar	0.776224	0.00299286
Ankrd28:chr14:31700626	Adar	0.774082	0.00312666
Pcmtd1:chr1:7170234	Adar	0.772364	0.00323718
Ralgapb:chr2:158496385	Adar	-0.772002	0.00326089
Irak2:chr6:113694869	Adar	0.769685	0.00341549
Selenop:chr15:3280055	Adar	0.769231	0.00344645
Acp2:chr2:91213422	Adar	-0.768621	0.00348837
Flt1:chr5:147638272	Adar	0.768621	0.00348837
Ccdc84:chr9:44411206	Adar	0.763574	0.00385009
Tmco6:chr18:36741291	Adar	0.762805	0.00390763
Fastk:chr5:24444824	Adar	0.762238	0.00395045
Dtx3l:chr16:35928036	Adar	0.761853	0.00397973
Azi2:chr9:118062623	Adar	0.761408	0.00401375
Gm37494:chr7:39567642	Adar	-0.760582	0.00407753
Kdm3b:chr18:34838142	Adar	0.756406	0.00441191
Dusp3:chr11:101972725	Adar	0.754391	0.00458047
Sco1:chr11:67064649	Adar	0.754118	0.00460361
Suz12:chr11:80033841	Adar	0.753043	0.00469586
Ywhag:chr5:135910350	Adar	0.753043	0.00469586
Sod2:chr17:13017188	Adar	0.752674	0.00472788
Enpp4:chr17:44099438	Adar	0.752674	0.00472788
Larp1:chr11:58060749	Adar	0.752674	0.00472788
Dtx3l:chr16:35926894	Adar	0.752674	0.00472788
Ywhag:chr5:135909781	Adar	0.752674	0.00472788
Nol10:chr12:17429793	Adar	0.752674	0.00472788
Map4k2:chr19:6354234	Adar	0.749563	0.00500405
Qpctl:chr7:19140398	Adar	0.749563	0.00500405
Cdk13:chr13:17804269	Adar	-0.749563	0.00500405
Camkv:chr9:107949313	Adar	-0.746497	0.00528802
Ppp3r1:chr11:17199744	Adar	0.746466	0.00529097
Eapp:chr12:54672264	Adar	-0.746333	0.00530359
Nol10:chr12:17429660	Adar	0.744297	0.00549919
Flt1:chr5:147635853	Adar	0.741259	0.00580115
Zfp655:chr5:145246018	Adar	0.734316	0.00653793
Mrpl24:chr3:87921730	Adar	-0.734316	0.00653793
Crybg1:chr10:43997537	Adar	0.734316	0.00653793
Spag9:chr11:94123063	Adar	0.734316	0.00653793
Apod:chr16:31304602	Adar	0.734316	0.00653793
Slc7a11:chr3:50367713	Adar	0.734316	0.00653793
Aco1:chr4:40190841	Adar	-0.734316	0.00653793
Dtx3l:chr16:35928048	Adar	0.734316	0.00653793
Utrn:chr10:12382762	Adar	0.734266	0.00654349
Ucp2:chr7:100498817	Adar	-0.734266	0.00654349
Qpctl:chr7:19140326	Adar	0.732413	0.00675165
Pcdh1:chr18:38186515	Adar	0.73205	0.00679293
Lrrc8b:chr5:105481450	Adar	0.730703	0.00694806
Rell1:chr5:63909788	Adar	0.72808	0.00725763
Ddx6:chr9:44637589	Adar	0.727273	0.00735503
Slfn5:chr11:82963277	Adar	0.727273	0.00735503
Zyg11b:chr4:108232673	Adar	-0.72537	0.00758833
Rhoc:chr3:104794372	Adar	0.725214	0.00760775
Flt1:chr5:147561637	Adar	0.725137	0.00761729
Islr:chr9:58158172	Adar	0.725137	0.00761729
Pvr:chr7:19904481	Adar	0.725137	0.00761729
2200002D01Rik:chr7:29247526	Adar	-0.725114	0.00762017
Dact3:chr7:16885788	Adar	0.725045	0.00762875
Stam:chr2:14147987	Adar	0.724422	0.00770659
Heatr3:chr8:88171868	Adar	-0.721542	0.00807444
Akap8:chr17:32304591	Adar	0.72028	0.00823977
Azin1:chr15:38491613	Adar	0.72028	0.00823977
Slc39a14:chr14:70305511	Adar	0.719759	0.00830862
Luc7l:chr17:26283571	Adar	0.71804	0.00853932
Ankrd28:chr14:31701507	Adar	0.71804	0.00853932
Snrnp48:chr13:38220600	Adar	-0.717416	0.00862419
Birc6:chr17:74703151	Adar	0.715958	0.00882492
Tesk1:chr4:43446873	Adar	0.715958	0.00882492
Rab27a:chr9:73097224	Adar	-0.715958	0.00882492
Klf16:chr10:80567359	Adar	-0.713287	0.00920178
Malat1:chr19:5795939	Adar	0.713287	0.00920178
Afdn:chr17:13905292	Adar	0.712875	0.00926089
Snhg11:chr2:158383936	Adar	0.711285	0.00949192
Nras:chr3:103066146	Adar	0.709618	0.00973881
Gfod1:chr13:43196380	Adar	0.708297	0.00993769
Ggcx:chr6:72430557	Adar	-0.707532	0.0100544
Ccnyl1:chr1:64724897	Adar	-0.707278	0.0100932
Dleu2:chr14:61617862	Adar	0.707278	0.0100932
Lrp1b:chr2:42189755	Adar	-0.706779	0.0101701
Ppp1r15b:chr1:133137583	Adar	0.704738	0.0104888
Dusp11:chr6:85944850	Adar	0.704243	0.0105672
Adgra2:chr8:27085964	Adar	-0.704243	0.0105672
Wipi2:chr5:142668113	Adar	-0.70336	0.0107081
Rab6b:chr9:103182126	Adar	0.701054	0.0110829
Sppl2a:chr2:126891466	Adar	-0.699301	0.0113742
Spag9:chr11:94123674	Adar	0.697024	0.011761
Lix1l:chr3:96624574	Adar	0.694797	0.0121486
Ankrd28:chr14:31700661	Adar	0.693521	0.0123749
C1qtnf4:chr2:90888668	Adar	0.692308	0.012593
Mdc1:chr17:35858619	Adar	-0.691232	0.0127887
Sec23b:chr2:144587554	Adar	0.690636	0.0128981
Psmd11:chr11:80472633	Adar	-0.690481	0.0129267
Gdf1:chr8:70331231	Adar	-0.690158	0.0129864
Mapk1ip1l:chr14:47319972	Adar	0.690019	0.0130122
Dact3:chr7:16885347	Adar	0.690019	0.0130122
Arrb1:chr7:99602401	Adar	0.690019	0.0130122
Dusp3:chr11:101972562	Adar	-0.688858	0.0132287
Naa35:chr13:59635522	Adar	-0.688858	0.0132287
Pfas:chr11:68986891	Adar	0.688189	0.0133546
Zbtb6:chr2:37425954	Adar	0.687724	0.0134428
Lypla2:chr4:135968506	Adar	-0.686941	0.0135919
Rap2c:chrX:51004526	Adar	0.684624	0.014041
Isg20l2:chr3:87940136	Adar	0.683382	0.014286
Agps:chr2:75928341	Adar	-0.683013	0.0143594
Arpp19:chr9:75057530	Adar	-0.682315	0.014499
Zmpste24:chr4:121060312	Adar	0.682315	0.014499
Ccnd2:chr6:127130223	Adar	0.681058	0.0147531
Dlg2:chr7:91581063	Adar	-0.680802	0.0148051
Cd82:chr2:93419367	Adar	0.680706	0.0148248
Sppl2a:chr2:126891488	Adar	-0.679511	0.0150702
Tirap:chr9:35184983	Adar	0.679511	0.0150702
Pvr:chr7:19904691	Adar	0.679511	0.0150702
Pcdh9:chr14:93201661	Adar	-0.679511	0.0150702
Sae1:chr7:16328129	Adar	-0.679242	0.0151258
Akap8:chr17:32304589	Adar	0.678322	0.0153173
Iws1:chr18:32102542	Adar	-0.678322	0.0153173
Abhd2:chr7:79360768	Adar	0.678322	0.0153173
Spock2:chr10:60132705	Adar	0.678322	0.0153173
Gm49394:chr7:142653728	Adar	0.678322	0.0153173
Nampt:chr12:32850670	Adar	0.678322	0.0153173
Marchf5:chr19:37219536	Adar	0.676073	0.0157928
Flnb:chr14:7937085	Adar	0.676008	0.0158067
Sh2d5:chr4:138260100	Adar	-0.673748	0.0162958
Ankrd28:chr14:31700663	Adar	0.672505	0.0165693
Ppfia3:chr7:45339191	Adar	0.671698	0.0167489
2900026A02Rik:chr5:113087496	Adar	-0.671329	0.0168315
Trim12c:chr7:104339230	Adar	-0.671329	0.0168315
Fam32a:chr8:72223815	Adar	-0.671329	0.0168315
Slfn5:chr11:82963289	Adar	0.671329	0.0168315
Pfas:chr11:68986892	Adar	0.670628	0.0169891
Vcam1:chr3:116111385	Adar	0.670063	0.0171168
Dhx32:chr7:133722177	Adar	0.670063	0.0171168
Timm44:chr8:4260088	Adar	0.665674	0.0181341
Dtx3l:chr16:35928060	Adar	0.665674	0.0181341
Kctd12:chr14:102979192	Adar	0.665674	0.0181341
Erp29:chr5:121447549	Adar	0.664355	0.0184481
Lamp2:chrX:38420316	Adar	0.664336	0.0184527
Pecam1:chr11:106654633	Adar	0.663162	0.0187356
Phip:chr9:82869574	Adar	0.66283	0.0188163
Rap2c:chrX:51004539	Adar	0.662027	0.0190123
Prpf4:chr4:62423987	Adar	0.661998	0.0190195
Coro2b:chr9:62422890	Adar	0.661988	0.0190217
Zkscan3:chr13:21389933	Adar	-0.658467	0.0198991
Abhd2:chr7:79360841	Adar	0.657343	0.0201855
Ltbp4:chr7:27325703	Adar	0.656144	0.0204939
Ensa:chr3:95630970	Adar	-0.655032	0.0207834
Cpne7:chr8:123132076	Adar	-0.654992	0.0207937
Nol10:chr12:17429681	Adar	0.654946	0.0208059
Rragc:chr4:123936763	Adar	-0.653158	0.0212776
Szrd1:chr4:141113161	Adar	0.652602	0.0214257
Dld:chr12:31331884	Adar	0.651705	0.0216665
Leprot:chr4:101659072	Adar	-0.651349	0.0217628
Flii:chr11:60721702	Adar	0.650444	0.0220086
Atad1:chr19:32695830	Adar	-0.650444	0.0220086
Lama5:chr2:180187683	Adar	0.650444	0.0220086
Ppm1d:chr11:85346050	Adar	-0.650444	0.0220086
Med4:chr14:73511190	Adar	0.650444	0.0220086
Ubr2:chr17:46955931	Adar	-0.650444	0.0220086
Mrpl11:chr19:4963401	Adar	0.650444	0.0220086
Ppp6r3:chr19:3455005	Adar	0.650444	0.0220086
Fyco1:chr9:123790808	Adar	-0.650444	0.0220086
Mier1:chr4:103150555	Adar	-0.650444	0.0220086
Me3:chr7:89848649	Adar	-0.650444	0.0220086
Dhx32:chr7:133722278	Adar	-0.650444	0.0220086
Hcfc1:chrX:73944422	Adar	-0.650444	0.0220086
Tbc1d9:chr8:83259323	Adar	0.650444	0.0220086
Phip:chr9:82869573	Adar	0.650444	0.0220086
Rbm43:chr2:51925063	Adar	0.650444	0.0220086
Scamp2:chr9:57577647	Adar	-0.650444	0.0220086
Pacsin1:chr17:27708041	Adar	-0.650444	0.0220086
Ell:chr8:70581768	Adar	-0.650444	0.0220086
Cfap44:chr16:44478937	Adar	0.650444	0.0220086
2310010J17Rik:chr7:90124999	Adar	0.650444	0.0220086
Gm49380:chr9:44102933	Adar	-0.650444	0.0220086
Grik5:chr7:25010643	Adar	0.65035	0.0220342
Ppp1r15b:chr1:133137544	Adar	0.65035	0.0220342
Cdk13:chr13:17804302	Adar	-0.650273	0.0220552
Rap2c:chrX:51004654	Adar	0.649426	0.0222874
Lrrc4c:chr2:96577218	Adar	0.649055	0.0223895
Bach1:chr16:87731852	Adar	0.648645	0.0225028
Crocc:chr4:141023019	Adar	0.647987	0.0226858
Rin3:chr12:102369843	Adar	-0.64775	0.0227518
Daw1:chr1:83209349	Adar	0.64775	0.0227518
Pfas:chr11:68985957	Adar	-0.647234	0.0228964
Dtx3l:chr16:35928084	Adar	0.647234	0.0228964
Ccnyl1:chr1:64724928	Adar	0.645351	0.0234291
Twsg1:chr17:65924426	Adar	0.644871	0.0235663
Eapp:chr12:54672358	Adar	-0.644484	0.0236773
Ankrd28:chr14:31700648	Adar	0.644484	0.0236773
Vamp4:chr1:162598198	Adar	-0.644484	0.0236773
Parg:chr14:32296625	Adar	0.643357	0.0240032
Dcun1d3:chr7:119856274	Adar	0.643357	0.0240032
Ube2b:chr11:51995908	Adar	-0.642526	0.0242452
Arih2:chr9:108604119	Adar	0.642526	0.0242452
Mkln1:chr6:31515667	Adar	-0.642109	0.0243674
Sh2d5:chr4:138260088	Adar	-0.640861	0.0247359
Grcc10:chr6:124739678	Adar	0.640671	0.0247923
Gstt1:chr10:75786946	Adar	0.639693	0.0250844
Ankrd28:chr14:31700968	Adar	0.639693	0.0250844
Srp68:chr11:116250777	Adar	-0.639693	0.0250844
Zdhhc20:chr14:57865579	Adar	-0.639693	0.0250844
Atf1:chr15:100245276	Adar	-0.639693	0.0250844
Ring1:chr17:34022132	Adar	-0.639693	0.0250844
Lipa:chr19:34523531	Adar	-0.639693	0.0250844
Slc1a1:chr19:28913338	Adar	0.639693	0.0250844
Gapvd1:chr2:34693456	Adar	-0.639693	0.0250844
Tln1:chr4:43544648	Adar	0.639693	0.0250844
Dlc1:chr8:36584906	Adar	-0.639693	0.0250844
Vps35:chr8:85264254	Adar	-0.639693	0.0250844
Pde4c:chr8:70747924	Adar	-0.639693	0.0250844
Pkm:chr9:59677455	Adar	-0.639693	0.0250844
Ppip5k1:chr2:121350005	Adar	-0.639693	0.0250844
Cpsf1:chr15:76599056	Adar	-0.639693	0.0250844
Serbp1:chr6:67285584	Adar	0.639693	0.0250844
Wdtc1:chr4:133292711	Adar	-0.639693	0.0250844
Nsrp1:chr11:77076715	Adar	-0.639693	0.0250844
Azi2:chr9:118062622	Adar	0.639693	0.0250844
Elavl1:chr8:4289068	Adar	0.639693	0.0250844
Tmem183a:chr1:134360902	Adar	-0.639693	0.0250844
Cflar:chr1:58754036	Adar	0.639436	0.0251615
Slc39a3:chr10:81029931	Adar	-0.6381	0.0255651
Mapk1:chr16:17044628	Adar	0.6381	0.0255651
Azin1:chr15:38491612	Adar	0.636364	0.0260969
Ankrd28:chr14:31701506	Adar	0.636364	0.0260969
Ccdc28b:chr4:129620226	Adar	-0.636364	0.0260969
Qk:chr17:10213924	Adar	0.634496	0.0266776
Galnt2l:chr8:122883492	Adar	-0.631638	0.0275846
Spaar:chr4:43731757	Adar	-0.630849	0.0278388
Malt1:chr18:65478477	Adar	-0.630849	0.0278388
Mgll:chr6:88827768	Adar	-0.630764	0.0278663
Ovca2:chr11:75176391	Adar	0.630474	0.0279603
Sod2:chr17:13020010	Adar	-0.629371	0.0283197
Itm2a:chrX:107397562	Adar	0.629371	0.0283197
Ovca2:chr11:75176432	Adar	0.629371	0.0283197
Aida:chr1:183324375	Adar	0.627032	0.0290927
Cfap300:chr9:8022079	Adar	0.626776	0.0291781
Vamp4:chr1:162598204	Adar	-0.626434	0.0292927
Dph3:chr14:32081680	Adar	0.624545	0.0299312
Lrrc58:chr16:37884343	Adar	0.624169	0.0300595
Btg3:chr16:78360165	Adar	0.62384	0.030172
Dennd6a:chr14:26631464	Adar	-0.623598	0.0302549
Ankrd28:chr14:31701375	Adar	0.623469	0.0302994
Tasor:chr14:27483446	Adar	-0.622378	0.0306759
Prkn:chr17:11525147	Adar	-0.622378	0.0306759
Gm37494:chr7:39569477	Adar	0.619966	0.0315202
Flna:chrX:74226869	Adar	-0.619966	0.0315202
Lix1l:chr3:96625311	Adar	0.619908	0.0315405
Erich1:chr8:14028025	Adar	-0.619734	0.0316024
Zc3h7a:chr16:11144711	Adar	-0.618638	0.0319923
Canx:chr11:50295141	Adar	0.617548	0.0323835
Mief2:chr11:60732705	Adar	-0.617385	0.032442
Pcdhgc5:chr18:37840667	Adar	0.617308	0.03247
Dcaf10:chr4:45377514	Adar	-0.616682	0.0326967
Csad:chr15:102177400	Adar	0.616347	0.0328184
Add3:chr19:53245612	Adar	-0.616042	0.0329296
Mapk11:chr15:89144684	Adar	-0.615835	0.0330052
Stom:chr2:35315406	Adar	-0.615385	0.0331699
Rpsa:chr9:120131419	Adar	-0.615385	0.0331699
Psma3:chr12:70995180	Adar	0.615385	0.0331699
Tpm4:chr8:72151149	Adar	-0.61499	0.033315
Plpp5:chr8:25723704	Adar	-0.614039	0.033666
Mettl7a1:chr15:100313389	Adar	-0.612961	0.0340673
Serinc3:chr2:163624251	Adar	0.612691	0.0341681
Cadm2:chr16:67190804	Adar	-0.61053	0.0349845
Dnajc5:chr2:181555094	Adar	0.610253	0.0350902
Zkscan3:chr13:21390009	Adar	-0.610244	0.0350937
Gng7:chr10:80949113	Adar	-0.609096	0.0355341
Sppl2a:chr2:126891483	Adar	-0.608392	0.035806
Ube2l6:chr2:84809405	Adar	-0.608392	0.035806
Rsph4a:chr10:33915339	Adar	0.608392	0.035806
Cpd:chr11:76781837	Adar	-0.608093	0.0359219
Lncppara:chr15:85707386	Adar	0.608093	0.0359219
Mydgf:chr17:56175893	Adar	-0.605955	0.0367585
Pakap:chr4:57895139	Adar	0.605955	0.0367585
Eef1g:chr19:8977002	Adar	0.605955	0.0367585
Stard3:chr11:98377537	Adar	0.605811	0.0368157
Ppp1r37:chr7:19532259	Adar	-0.605811	0.0368157
Foxn3:chr12:99190915	Adar	-0.605649	0.0368796
Rpa1:chr11:75300643	Adar	-0.603512	0.0377317
2610002M06Rik:chrX:107784383	Adar	0.603267	0.0378306
Ankrd28:chr14:31700629	Adar	0.602453	0.0381595
Tor1aip1:chr1:156005064	Adar	0.602453	0.0381595
Sirt4:chr5:115478862	Adar	0.602106	0.0383003
Tmem80:chr7:141336698	Adar	-0.601844	0.0384066
Stom:chr2:35314949	Adar	0.601844	0.0384066
Chsy1:chr7:66173734	Adar	0.601844	0.0384066
Snapc1l:chr12:73946423	Adar	0.601399	0.0385885
Calm2:chr17:87434279	Adar	-0.600595	0.0389179
Abca3:chr17:24402945	Adar	0.600446	0.0389791
Ncl:chr1:86345173	Adar	-0.600004	0.0391614
Bysl:chr17:47599622	Adar	0.599106	0.0395332
Iqgap1:chr7:80712404	Adar	0.59895	0.0395981
Ankrd28:chr14:31701508	Adar	0.598606	0.0397413
Zkscan3:chr13:21392480	Adar	0.598606	0.0397413
Agl:chr3:116744082	Adar	-0.598606	0.0397413
Septin8:chr11:53542541	Adar	0.596632	0.0405712
Akt3:chr1:177103033	Adar	-0.596632	0.0405712
Tspan5:chr3:138742599	Adar	0.596632	0.0405712
Bvht:chr18:61644322	Adar	0.596632	0.0405712
Sgpl1:chr10:61099884	Adar	0.594593	0.0414408
Pla2g15:chr8:106164372	Adar	0.594593	0.0414408
Tmem265:chr7:127564789	Adar	-0.594593	0.0414408
Tmem175:chr5:108634112	Adar	0.594406	0.0415215
Eng:chr2:32676992	Adar	-0.594406	0.0415215
Hacd3:chr9:64987584	Adar	-0.594406	0.0415215
Ece1:chr4:137964902	Adar	-0.594406	0.0415215
Ndufb10:chr17:24722924	Adar	-0.594406	0.0415215
Ikbip:chr10:91098466	Adar	-0.5944	0.0415238
Rfc2:chr5:134592771	Adar	-0.592986	0.0421356
Sypl:chr12:32974188	Adar	0.592648	0.0422829
Mcts1:chrX:38608839	Adar	0.591945	0.0425902
Dusp8:chr7:142079785	Adar	0.591945	0.0425902
Gm10687:chr9:44123834	Adar	0.591945	0.0425902
Bbs2:chr8:94080122	Adar	0.591564	0.0427573
Zhx1:chr15:58052342	Adar	-0.591312	0.042868
Parvb:chr15:84271243	Adar	0.591312	0.042868
Ptdss2:chr7:141131471	Adar	0.591312	0.042868
Fam219a:chr4:41534878	Adar	0.591312	0.042868
Malt1:chr18:65478403	Adar	0.591312	0.042868
Ubn1:chr16:5074336	Adar	-0.591312	0.042868
Cyp7b1:chr3:18103779	Adar	0.591312	0.042868
Cables1:chr18:11840032	Adar	-0.591312	0.042868
Trim16:chr11:62841972	Adar	0.591312	0.042868
Dtx3l:chr16:35928090	Adar	0.591312	0.042868
Rlim:chrX:103960550	Adar	0.591312	0.042868
Gm21973:chr15:10334239	Adar	0.591312	0.042868
Calcrl:chr2:84331012	Adar	0.590841	0.0430759
Ppib:chr9:66064455	Adar	-0.590785	0.0431005
Zkscan3:chr13:21389906	Adar	-0.589088	0.0438551
Parp12:chr6:39092298	Adar	-0.588442	0.0441448
Ralb:chr1:119470659	Adar	0.588442	0.0441448
Ppp1r15b:chr1:133137534	Adar	0.588442	0.0441448
Sp3:chr2:72937548	Adar	0.587453	0.0445911
Cfap300:chr9:8021805	Adar	0.587453	0.0445911
Cul4a:chr8:13146785	Adar	0.587413	0.0446093
Scarf1:chr11:75518738	Adar	-0.587413	0.0446093
Coro2b:chr9:62422774	Adar	0.587342	0.0446412
4930453N24Rik:chr16:64762650	Adar	0.587282	0.0446686
Ecm2:chr13:49531954	Adar	-0.587147	0.0447298
Ccnl2:chr4:155823018	Adar	-0.586625	0.044967
Slc1a1:chr19:28913219	Adar	0.585969	0.0452666
Apold1:chr6:134986492	Adar	0.58494	0.0457391
B3gat3:chr19:8925716	Adar	-0.584817	0.0457956
Rsad1:chr11:94540492	Adar	0.584522	0.045932
Kif3c:chr12:3404647	Adar	-0.584522	0.045932
Ywhab:chr2:164017031	Adar	0.582244	0.0469936
Nrxn3:chr12:90020922	Adar	0.581619	0.0472877
Mob3a:chr10:80685913	Adar	-0.581437	0.0473736
Mrpl24:chr3:87921449	Adar	-0.58042	0.047856
Son:chr16:91656089	Adar	-0.58042	0.047856
Gnb4:chr3:32584090	Adar	0.58042	0.047856
Pkd2:chr5:104504977	Adar	0.58042	0.047856
Pkd2:chr5:104504979	Adar	0.58042	0.047856
Tspan14:chr14:40907022	Adar	0.58042	0.047856
Abhd2:chr7:79362194	Adar	0.58042	0.047856
Sntb2:chr8:107018222	Adar	0.580163	0.0479782
Rab2a:chr4:8597225	Adar	0.580091	0.0480125
Cfap300:chr9:8022072	Adar	0.580091	0.0480125
Mrpl24:chr3:87921457	Adar	0.577934	0.0490488
Rab1b:chr19:5099790	Adar	-0.577479	0.0492696
Echs1:chr7:140105804	Adar	-0.577196	0.0494072
Trmt1l:chr1:151443664	Adar	-0.576604	0.049696
Zzef1:chr11:72926252	Adar	-0.57557	0.050203
Bbip1:chr19:53932441	Adar	-0.574978	0.0504948
Gch1:chr14:47155050	Adar	0.574779	0.0505933
Slc6a6:chr6:91758759	Adar	0.574432	0.0507653
Zfp516:chr18:83003120	Adar	0.574432	0.0507653
Cpne7:chr8:123131831	Adar	-0.574143	0.0509085
Meg3:chr12:109546089	Adar	-0.57392	0.0510197
Srpk1:chr17:28592856	Adar	-0.573427	0.0512656
Rnf168:chr16:32300332	Adar	-0.573427	0.0512656
Slc6a6:chr6:91757017	Adar	0.573427	0.0512656
Iqgap1:chr7:80712390	Adar	0.573427	0.0512656
Sfxn2:chr19:46596324	Adar	0.571933	0.0520151
Nrg1:chr8:32454511	Adar	0.570437	0.0527741
Fech:chr18:64457535	Adar	0.569983	0.0530057
Iqcg:chr16:33014533	Adar	0.569983	0.0530057
Dtx3l:chr16:35927277	Adar	0.569983	0.0530057
Nol10:chr12:17429899	Adar	0.569983	0.0530057
Akr1b3:chr6:34310612	Adar	0.56981	0.0530941
Fkbp7:chr2:76663314	Adar	-0.56981	0.0530941
Supt5:chr7:28320262	Adar	0.56981	0.0530941
Crybg1:chr10:43997300	Adar	0.56981	0.0530941
Txndc15:chr13:55726110	Adar	0.56981	0.0530941
Ube2e1:chr14:18330987	Adar	0.56981	0.0530941
Sdc3:chr4:130821508	Adar	-0.56981	0.0530941
Smu1:chr4:40739680	Adar	-0.56981	0.0530941
Cplx1:chr5:108519040	Adar	-0.56981	0.0530941
Tent2:chr13:93168459	Adar	-0.56981	0.0530941
Itga1:chr13:114996932	Adar	0.56981	0.0530941
Foxo4:chrX:101260482	Adar	0.56981	0.0530941
Gspt1:chr16:11224427	Adar	-0.56981	0.0530941
Ptgr2:chr12:84305952	Adar	-0.56981	0.0530941
Myo1h:chr5:114363581	Adar	-0.569254	0.0533794
Mcf2l:chr8:13018772	Adar	0.569095	0.0534611
Slf2:chr19:44981524	Adar	-0.569095	0.0534611
Ercc6:chr14:32578132	Adar	0.568425	0.0538066
Pmpca:chr2:26396549	Adar	0.567426	0.054324
Crocc:chr4:141023017	Adar	0.567426	0.054324
Pum2:chr12:8750269	Adar	0.566434	0.0548421
Sppl2a:chr2:126891114	Adar	0.566434	0.0548421
AW011738:chr4:156209798	Adar	-0.566434	0.0548421
Ntan1:chr16:13834262	Adar	0.565822	0.0551627
Trp53inp1:chr4:11171319	Adar	0.565822	0.0551627
Mia3:chr1:183330809	Adar	-0.565822	0.0551627
Ttc9c:chr19:8811101	Adar	0.565822	0.0551627
Pla2g15:chr8:106163970	Adar	-0.565589	0.0552857
Btaf1:chr19:37012286	Adar	0.565589	0.0552857
Rab27a:chr9:73096712	Adar	0.564396	0.0559163
Gls:chr1:52187395	Adar	0.563924	0.0561672
Dnajc1:chr2:18214661	Adar	-0.563924	0.0561672
Slc7a11:chr3:50365128	Adar	0.561662	0.0573803
Ube2g2:chr10:77645119	Adar	-0.561456	0.0574918
Yy1:chr12:108816579	Adar	-0.560968	0.0577561
Nfib:chr4:82290326	Adar	-0.559916	0.0583293
Lmtk2:chr5:144187074	Adar	0.559916	0.0583293
Sort1:chr3:108356667	Adar	-0.559916	0.0583293
Mrpl51:chr6:125195862	Adar	0.55985	0.0583655
Ankrd28:chr14:31700662	Adar	0.559441	0.0585895
Mkln1:chr6:31515747	Adar	-0.559441	0.0585895
Nol10:chr12:17429671	Adar	0.559441	0.0585895
Kif5b:chr18:6201433	Adar	0.558807	0.0589374
Serinc3:chr2:163627153	Adar	-0.558338	0.0591964
Aar2:chr2:156551013	Adar	0.558338	0.0591964
Sh2d5:chr4:138260127	Adar	-0.556919	0.0599836
Tmem175:chr5:108634073	Adar	0.556919	0.0599836
Calm3:chr7:16916290	Adar	-0.556919	0.0599836
Gnl3l:chrX:150984552	Adar	0.556352	0.0603
Kdm6b:chr11:69404689	Adar	-0.556352	0.0603
Zbtb7b:chr3:89379223	Adar	-0.556352	0.0603
Abhd2:chr7:79360606	Adar	0.556352	0.0603
Pum2:chr12:8750515	Adar	0.555248	0.0609196
Rab43:chr6:87789544	Adar	0.555248	0.0609196
Gramd1a:chr7:31135109	Adar	0.554389	0.0614047
Marchf5:chr19:37219531	Adar	-0.553813	0.0617315
Pih1d1:chr7:45156074	Adar	-0.553658	0.0618201
Gm28035:chr2:30274102	Adar	0.553658	0.0618201
Snhg11:chr2:158384052	Adar	-0.553416	0.0619578
Icam1:chr9:21020602	Adar	0.553416	0.0619578
Scn1b:chr7:31116973	Adar	-0.552448	0.0625115
Pfas:chr11:68985937	Adar	-0.552448	0.0625115
Ppp1r15b:chr1:133137982	Adar	0.552448	0.0625115
Tmem69:chr4:116552787	Adar	0.552448	0.0625115
Arhgef12:chr9:42966207	Adar	0.552448	0.0625115
Nrxn1:chr17:90858670	Adar	0.552385	0.0625474
Ankrd13a:chr5:114804423	Adar	0.551689	0.0629477
AW011738:chr4:156209836	Adar	-0.551086	0.0632955
Acsl4:chrX:142319263	Adar	0.550737	0.0634979
Pank3:chr11:35787877	Adar	0.549913	0.0639767
Nol10:chr12:17429884	Adar	0.549913	0.0639767
Sdc4:chr2:164424643	Adar	0.548129	0.0650221
Bicd2:chr13:49386158	Adar	-0.548129	0.0650221
Polr3f:chr2:144540438	Adar	0.547372	0.0654697
Iws1:chr18:32102599	Adar	-0.546411	0.0660406
Cds2:chr2:132309636	Adar	-0.546411	0.0660406
Ro60:chr1:143755371	Adar	-0.546411	0.0660406
Apobec3:chr15:79907541	Adar	0.545455	0.0666119
Zbtb4:chr11:69783302	Adar	-0.545455	0.0666119
Tbc1d24:chr17:24176488	Adar	-0.545455	0.0666119
Prrc2a:chr17:35149333	Adar	0.545455	0.0666119
Eapp:chr12:54672286	Adar	-0.545455	0.0666119
Fus:chr7:127982770	Adar	0.54502	0.0668725
Chtf8:chr8:106884977	Adar	-0.54492	0.0669326
2610005L07Rik:chr8:20401400	Adar	-0.54492	0.0669326
Ggps1:chr13:14053441	Adar	0.544823	0.0669911
Uros:chr7:133686578	Adar	-0.543835	0.0675871
Cep76:chr18:67617976	Adar	-0.543231	0.0679536
Rsrc2:chr5:123741252	Adar	-0.542908	0.0681501
Spns2:chr11:72489576	Adar	-0.542803	0.0682143
Tor1aip1:chr1:156008029	Adar	0.542267	0.0685411
Ube2l6:chr2:84809669	Adar	-0.542267	0.0685411
Inpp1:chr1:52789194	Adar	0.541558	0.0689754
Tirap:chr9:35184967	Adar	0.541558	0.0689754
Pofut1:chr2:153266122	Adar	-0.541558	0.0689754
Trnp1:chr4:133497873	Adar	-0.541558	0.0689754
Lix1l:chr3:96624803	Adar	0.54086	0.069405
St3gal1:chr15:67103611	Adar	0.538529	0.0708518
Rpa1:chr11:75300577	Adar	-0.538462	0.0708943
Sgk1:chr10:21999132	Adar	0.538462	0.0708943
Mier1:chr4:103164739	Adar	0.538462	0.0708943
9930104L06Rik:chr4:124944373	Adar	0.538462	0.0708943
AW011738:chr4:156209802	Adar	-0.538462	0.0708943
Emc8:chr8:120655766	Adar	-0.538428	0.0709153
Zkscan3:chr13:21392336	Adar	-0.538033	0.0711629
Mgat4a:chr1:37443158	Adar	0.537793	0.0713133
Appbp2:chr11:85189963	Adar	0.536699	0.0720026
Gnl3l:chrX:150984526	Adar	0.536699	0.0720026
Ing4:chr6:125048576	Adar	-0.536699	0.0720026
Miat:chr5:112215820	Adar	0.536699	0.0720026
Cdk13:chr13:17804344	Adar	-0.536584	0.0720754
Ncl:chr1:86347736	Adar	0.536584	0.0720754
Elk4:chr1:132025641	Adar	0.536584	0.0720754
Dtx3l:chr16:35928046	Adar	0.536176	0.072334
Mier1:chr4:103164955	Adar	0.535903	0.0725075
Meg3:chr12:109569316	Adar	-0.535903	0.0725075
Slfn5:chr11:82963832	Adar	0.535903	0.0725075
Ccdc28b:chr4:129620225	Adar	-0.535225	0.0729392
Mkln1:chr6:31515767	Adar	-0.533337	0.0741504
Ifih1:chr2:62596500	Adar	0.532539	0.0746663
Psma3:chr12:70994636	Adar	-0.5324	0.0747563
Prxl2c:chr13:64291046	Adar	-0.5324	0.0747563
Zfp626:chr7:27821531	Adar	-0.5324	0.0747563
Yars:chr4:129218996	Adar	-0.532379	0.07477
Fn3krp:chr11:121429844	Adar	0.532379	0.07477
Trim16:chr11:62841685	Adar	0.532379	0.07477
Tmem65:chr15:58823186	Adar	-0.532379	0.07477
Zbtb34:chr2:33406883	Adar	-0.532379	0.07477
Xpo6:chr7:126107214	Adar	0.532181	0.0748984
Rbm25:chr12:83659559	Adar	-0.532181	0.0748984
Reep3:chr10:67015022	Adar	0.532181	0.0748984
Med23:chr10:24908811	Adar	-0.532181	0.0748984
Naa35:chr13:59635426	Adar	-0.532181	0.0748984
Fbxl6:chr15:76535849	Adar	-0.532181	0.0748984
Eif1ad:chr19:5368197	Adar	0.532181	0.0748984
Faap100:chr11:120370322	Adar	0.532181	0.0748984
Nop16:chr13:54585836	Adar	0.532181	0.0748984
Tti1:chr2:157995409	Adar	-0.532181	0.0748984
Zranb1:chr7:132986255	Adar	-0.532181	0.0748984
Ptpn13:chr5:103591304	Adar	-0.532181	0.0748984
Iars:chr13:49730050	Adar	0.532181	0.0748984
Mllt6:chr11:97676958	Adar	0.532181	0.0748984
She:chr3:89834178	Adar	-0.532181	0.0748984
Tnrc6a:chr7:123187484	Adar	-0.532181	0.0748984
Mrpl42:chr10:95493653	Adar	0.532181	0.0748984
Fryl:chr5:73054580	Adar	0.532181	0.0748984
Txnrd2:chr16:18477830	Adar	0.532181	0.0748984
Iqgap1:chr7:80712052	Adar	0.531469	0.0753623
Cds2:chr2:132309669	Adar	-0.531469	0.0753623
Chp1:chr2:119586046	Adar	0.531469	0.0753623
Ppp1r15b:chr1:133137983	Adar	0.531469	0.0753623
Zfp651:chr9:121768584	Adar	0.530264	0.0761511
Ptprd:chr4:76571919	Adar	0.530264	0.0761511
Wipi2:chr5:142668136	Adar	0.529991	0.0763305
Itm2a:chrX:107397564	Adar	0.528897	0.0770524
Rnf168:chr16:32300347	Adar	0.528897	0.0770524
Cdh13:chr8:119323469	Adar	-0.528378	0.0773967
Map2k2:chr10:81122226	Adar	-0.528378	0.0773967
Crocc:chr4:141023038	Adar	0.528182	0.0775272
Heatr3:chr8:88171871	Adar	-0.527513	0.0779732
Dnajc1:chr2:18215302	Adar	0.526319	0.0787731
Gm45837:chr7:101411568	Adar	0.525594	0.0792619
Nol10:chr12:17429885	Adar	0.525395	0.0793962
Ykt6:chr11:5967429	Adar	0.524476	0.0800194
Taok1:chr11:77534496	Adar	0.524476	0.0800194
Ptprj:chr2:90548568	Adar	-0.524476	0.0800194
Mier1:chr4:103165420	Adar	0.524476	0.0800194
Agl:chr3:116744097	Adar	-0.524476	0.0800194
Ppp1r15b:chr1:133138010	Adar	0.524476	0.0800194
Arcn1:chr9:44742487	Adar	0.524476	0.0800194
Frmd5:chr2:121775045	Adar	0.524218	0.0801946
Ttc9c:chr19:8810502	Adar	0.524165	0.0802306
Cxcr5:chr9:44511833	Adar	-0.5232	0.0808894
Rad1:chr15:10493440	Adar	0.523066	0.0809812
Heatr3:chr8:88171189	Adar	0.522466	0.0813932
Palm:chr10:79818937	Adar	0.522466	0.0813932
2900026A02Rik:chr5:113094019	Adar	-0.522466	0.0813932
Tmem234:chr4:129607763	Adar	0.522082	0.0816574
Malt1:chr18:65477091	Adar	0.521892	0.0817882
Cfap300:chr9:8021804	Adar	0.521892	0.0817882
Slc27a1:chr8:71586649	Adar	0.521892	0.0817882
Efr3a:chr15:65853108	Adar	0.52143	0.0821075
Ltv1:chr10:13182326	Adar	0.52143	0.0821075
Rel:chr11:23737880	Adar	0.52143	0.0821075
Ddx41:chr13:55531657	Adar	-0.52143	0.0821075
Scg5:chr2:113827431	Adar	-0.52143	0.0821075
Tmem132a:chr19:10860383	Adar	-0.52143	0.0821075
Lancl1:chr1:67003511	Adar	-0.52143	0.0821075
Mllt10:chr2:18206131	Adar	-0.52143	0.0821075
Nmd3:chr3:69726369	Adar	0.52143	0.0821075
Ptbp3:chr4:59476096	Adar	0.52143	0.0821075
Mob3c:chr4:115835092	Adar	0.52143	0.0821075
Aga:chr8:53513623	Adar	-0.52143	0.0821075
Cnot7:chr8:40494038	Adar	-0.52143	0.0821075
Ap4b1:chr3:103820903	Adar	0.52143	0.0821075
Gramd4:chr15:86136545	Adar	-0.52143	0.0821075
Rbm42:chr7:30645136	Adar	0.52143	0.0821075
Tns2:chr15:102107082	Adar	0.52143	0.0821075
Mapkap1:chr2:34563129	Adar	0.52143	0.0821075
Fbxo2:chr4:148164342	Adar	-0.52143	0.0821075
Pbxip1:chr3:89446152	Adar	0.52143	0.0821075
Krt8:chr15:101997991	Adar	-0.52143	0.0821075
Dtx3l:chr16:35928002	Adar	0.52143	0.0821075
Ppp4r2:chr6:100866939	Adar	0.52143	0.0821075
Adgrf5:chr17:43457293	Adar	-0.52143	0.0821075
Klhl24:chr16:20124394	Adar	-0.52143	0.0821075
Pym1:chr10:128765870	Adar	0.52143	0.0821075
4931406P16Rik:chr7:34257405	Adar	0.52143	0.0821075
Prrg1:chrX:78450657	Adar	0.52114	0.0823085
Dync1li1:chr9:114723647	Adar	-0.519655	0.0833413
Fubp3:chr2:31615894	Adar	0.519301	0.0835887
Cachd1:chr4:101004104	Adar	0.518794	0.0839445
Tnfrsf1b:chr4:145213545	Adar	0.518794	0.0839445
Nkd1:chr8:88521380	Adar	-0.518794	0.0839445
Gm29609:chr5:31173480	Adar	-0.51839	0.0842288
Bmpr2:chr1:59874208	Adar	-0.517483	0.0848688
Gm49394:chr7:142653273	Adar	-0.517483	0.0848688
Arcn1:chr9:44743710	Adar	-0.517483	0.0848688
Hmgcl:chr4:135957129	Adar	-0.516091	0.0858572
Firre:chrX:50600829	Adar	0.516091	0.0858572
Stam:chr2:14147991	Adar	0.51593	0.0859718
Dynll1:chr5:115299260	Adar	0.514887	0.0867183
Slc35e1:chr8:72482674	Adar	0.514887	0.0867183
B4galt5:chr2:167300021	Adar	0.514831	0.0867586
Mydgf:chr17:56175996	Adar	0.514668	0.0868757
Arap2:chr5:62602511	Adar	-0.514668	0.0868757
Tmem175:chr5:108634075	Adar	0.514097	0.0872864
Daxx:chr17:33915180	Adar	-0.514097	0.0872864
Crim1:chr17:78375996	Adar	-0.514097	0.0872864
Zyg11b:chr4:108232060	Adar	-0.514097	0.0872864
Rnpep:chr1:135275636	Adar	0.514097	0.0872864
Gm10687:chr9:44124086	Adar	-0.514021	0.0873413
Klf6:chr13:5869473	Adar	0.512284	0.0886004
Isg20l2:chr3:87940037	Adar	0.511737	0.0889996
Lactb2:chr1:13625013	Adar	-0.511484	0.0891844
Gm10687:chr9:44124037	Adar	-0.511384	0.0892572
Pcmtd1:chr1:7172370	Adar	0.511384	0.0892572
Lrrc8d:chr5:105797683	Adar	-0.510679	0.0897745
Slc9a3r2:chr17:24641114	Adar	-0.510679	0.0897745
Etfb:chr7:43457721	Adar	-0.510679	0.0897745
Slc1a3:chr15:8678443	Adar	-0.510679	0.0897745
Apobec3:chr15:79908304	Adar	0.510679	0.0897745
Pacsin2:chr15:83386734	Adar	-0.510679	0.0897745
Psmd12:chr11:107479632	Adar	-0.510679	0.0897745
Pdlim7:chr13:55502061	Adar	-0.510679	0.0897745
Slc37a1:chr17:31350226	Adar	0.510679	0.0897745
Fas:chr19:34314341	Adar	0.510679	0.0897745
Ube3a:chr7:59281127	Adar	-0.510679	0.0897745
Cers6:chr2:69113978	Adar	0.510679	0.0897745
Pex16:chr2:92377738	Adar	-0.510679	0.0897745
Tspan2:chr3:102768918	Adar	-0.510679	0.0897745
Ppt1:chr4:122858320	Adar	0.510679	0.0897745
Etv6:chr6:134040239	Adar	0.510679	0.0897745
Itpkb:chr1:180332184	Adar	-0.510679	0.0897745
Arhgef1:chr7:24921979	Adar	0.510679	0.0897745
Igfn1:chr1:135954589	Adar	-0.510679	0.0897745
Zfp217:chr2:170110045	Adar	0.510679	0.0897745
Capza1:chr3:104825030	Adar	-0.510679	0.0897745
Ggps1:chr13:14053517	Adar	-0.51049	0.0899137
Arhgdia:chr11:120579091	Adar	-0.51049	0.0899137
Sdf4:chr4:156010666	Adar	-0.51049	0.0899137
Ubald1:chr16:4875295	Adar	0.51049	0.0899137
Rbbp4:chr4:129309891	Adar	0.51049	0.0899137
Caprin1:chr2:103765252	Adar	0.51049	0.0899137
Apobec3:chr15:79907814	Adar	0.509902	0.0903466
Trmt1l:chr1:151443667	Adar	-0.507956	0.0917902
Extl3:chr14:65053907	Adar	-0.507882	0.0918458
Rhpn2:chr7:35391300	Adar	-0.507597	0.0920584
Afdn:chr17:13905197	Adar	0.507597	0.0920584
Meg3:chr12:109563743	Adar	-0.50758	0.0920714
Myo10:chr15:25812645	Adar	0.507576	0.092074
Qk:chr17:10213732	Adar	0.505418	0.0936965
Nr3c1:chr18:39413188	Adar	0.504842	0.0941328
Ric8b:chr10:85016210	Adar	-0.504842	0.0941328
Wdr70:chr15:8092783	Adar	-0.504842	0.0941328
Fbrs:chr7:127490251	Adar	-0.504842	0.0941328
Rictor:chr15:6797182	Adar	0.504842	0.0941328
Cpne7:chr8:123131823	Adar	-0.504379	0.0944845
Aco2:chr15:81907218	Adar	0.504379	0.0944845
Cops2:chr2:125831471	Adar	0.503865	0.0948763
Efhd2:chr4:141858998	Adar	0.503865	0.0948763
Cpne7:chr8:123131818	Adar	-0.503497	0.0951574
Dusp3:chr11:101972534	Adar	-0.503416	0.0952192
Amotl1:chr9:14546967	Adar	0.503416	0.0952192
Dcun1d3:chr7:119856185	Adar	0.503416	0.0952192
Bloc1s3:chr7:19506111	Adar	-0.503416	0.0952192
Sirt4:chr5:115478867	Adar	0.50277	0.0957133
Nt5dc3:chr10:86836357	Adar	0.501757	0.0964926
Atp6v1b2:chr8:69112695	Adar	0.499928	0.0979109
Ntn4:chr10:93745773	Adar	-0.499928	0.0979109
Slc25a19:chr11:115620926	Adar	-0.499928	0.0979109
Epc1:chr18:6454380	Adar	-0.499928	0.0979109
Uhrf2:chr19:30093524	Adar	-0.499928	0.0979109
Mtmr14:chr6:113270664	Adar	0.499928	0.0979109
Rrp12:chr19:41873027	Adar	0.499928	0.0979109
Trpm3:chr19:22914554	Adar	0.499928	0.0979109
Nebl:chr2:17345481	Adar	-0.499928	0.0979109
Rab11b:chr17:33744191	Adar	-0.499928	0.0979109
Ppp1r15b:chr1:133137324	Adar	0.497392	0.0998997
Ggps1:chr13:14052089	Adar	-0.496503	0.100603
Igfbp7:chr5:77407731	Adar	-0.496503	0.100603
Psma3:chr12:70995129	Adar	0.496503	0.100603
Nol10:chr12:17429612	Adar	0.496503	0.100603
Gnl3l:chrX:150984257	Adar	-0.496503	0.100603
Rnf38:chr4:44128224	Adar	0.495663	0.101271
Tbc1d22a:chr15:86497638	Adar	0.495663	0.101271
Mapk1:chr16:17044635	Adar	-0.495663	0.101271
Mob3a:chr10:80685919	Adar	0.495095	0.101724
Atp10a:chr7:58663791	Adar	0.49474	0.102008
Selenot:chr3:58590701	Adar	-0.493077	0.103345
Malt1:chr18:65478482	Adar	-0.49297	0.103432
Gna11:chr10:81529341	Adar	-0.49297	0.103432
Ski:chr4:155155172	Adar	-0.492668	0.103676
Ube2d2a:chr18:35804988	Adar	-0.492668	0.103676
Appl2:chr10:83630297	Adar	0.491274	0.104808
Slc3a1:chr17:85063388	Adar	-0.491274	0.104808
B430010I23Rik:chr8:41022453	Adar	0.491274	0.104808
Smpd4:chr16:17637746	Adar	-0.491181	0.104884
Utrn:chr10:12744050	Adar	0.490934	0.105085
Pum2:chr12:8749777	Adar	0.490934	0.105085
Rell1:chr5:63909781	Adar	0.490934	0.105085
Slfn5:chr11:82963283	Adar	0.490369	0.105548
Adap2:chr11:80178849	Adar	0.48951	0.106252
Cbx1:chr11:96807066	Adar	0.48951	0.106252
Ercc6:chr14:32578133	Adar	0.48951	0.106252
Ankrd28:chr14:31700931	Adar	0.488935	0.106726
Srpk1:chr17:28592871	Adar	-0.488438	0.107137
Sirt4:chr5:115478891	Adar	0.488438	0.107137
Mdc1:chr17:35858637	Adar	-0.487622	0.107814
Wipi2:chr5:142669236	Adar	0.486866	0.108443
Colec12:chr18:9882337	Adar	-0.486791	0.108505
Mapk1ip1l:chr14:47322414	Adar	0.486484	0.108761
Iqcg:chr16:33015605	Adar	-0.486484	0.108761
Prxl2c:chr13:64290157	Adar	-0.485928	0.109227
Atxn7:chr14:14106277	Adar	0.485928	0.109227
Ythdf3:chr3:16216089	Adar	0.485928	0.109227
Iqgap1:chr7:80712039	Adar	0.484214	0.11067
Mob3a:chr10:80685750	Adar	0.484214	0.11067
Ankrd28:chr14:31701444	Adar	0.484062	0.110797
Kpna4:chr3:69073109	Adar	0.483476	0.111294
Chst11:chr10:83194710	Adar	0.483476	0.111294
Dtx3l:chr16:35928468	Adar	0.483476	0.111294
Ube2b:chr11:51995715	Adar	-0.483363	0.11139
Itih5:chr2:10251430	Adar	0.483363	0.11139
Ece1:chr4:137964049	Adar	-0.483363	0.11139
Rab14:chr2:35180730	Adar	0.483363	0.11139
Zyg11b:chr4:108234791	Adar	0.483264	0.111474
Numa1:chr7:102014433	Adar	-0.483264	0.111474
Zc3h7a:chr16:11143666	Adar	0.482613	0.112028
Mier1:chr4:103165402	Adar	0.482517	0.112109
Ovca2:chr11:75176383	Adar	0.482517	0.112109
Cds2:chr2:132309884	Adar	-0.482517	0.112109
Coro2b:chr9:62422823	Adar	0.482517	0.112109
Gnl3l:chrX:150984618	Adar	0.480705	0.113662
2610002M06Rik:chrX:107784379	Adar	0.480705	0.113662
Dstyk:chr1:132465026	Adar	-0.480503	0.113835
Dis3l2:chr1:86909027	Adar	-0.480384	0.113937
Haus2:chr2:120621231	Adar	-0.479861	0.114389
Fmnl2:chr2:52872339	Adar	0.478885	0.115234
Cds2:chr2:132309876	Adar	-0.478885	0.115234
Zfp609:chr9:65692632	Adar	0.478575	0.115503
Pigv:chr4:133661581	Adar	0.478575	0.115503
Mirg:chr12:109747938	Adar	0.478453	0.11561
Ncl:chr1:86350051	Adar	0.477738	0.116233
Isg20l2:chr3:87940333	Adar	0.477738	0.116233
Lmtk3:chr7:45793705	Adar	0.477738	0.116233
Srsf10:chr4:135864698	Adar	0.477305	0.116611
Sez6l2:chr7:126964995	Adar	-0.477305	0.116611
Filip1l:chr16:57570873	Adar	-0.477305	0.116611
Ecm2:chr13:49531387	Adar	0.477305	0.116611
Ide:chr19:37269309	Adar	0.477305	0.116611
Fitm2:chr2:163467539	Adar	0.477196	0.116707
Gabpb2:chr3:95184305	Adar	0.476358	0.117442
Brd4:chr17:32197057	Adar	0.475678	0.118041
Cltc:chr11:86722274	Adar	-0.475678	0.118041
Vamp3:chr4:151048091	Adar	0.475524	0.118176
Ovca2:chr11:75177367	Adar	0.475524	0.118176
Slfn5:chr11:82962600	Adar	0.475524	0.118176
Eif2s3y:chrY:1016396	Adar	0.475524	0.118176
Taok1:chr11:77534493	Adar	0.474523	0.119062
Mrpl9:chr3:94448551	Adar	-0.474292	0.119267
Ndufa3:chr7:3619706	Adar	0.474244	0.119309
Hbp1:chr12:31927166	Adar	-0.474006	0.119521
Snx9:chr17:5930629	Adar	-0.47305	0.120373
Pnpla6:chr8:3522871	Adar	-0.47305	0.120373
Med8:chr4:118413661	Adar	0.47305	0.120373
Nfyb:chr10:82749441	Adar	0.47305	0.120373
Myh10:chr11:68793145	Adar	-0.47305	0.120373
Bmp1:chr14:70491437	Adar	-0.47305	0.120373
Son:chr16:91655973	Adar	-0.47305	0.120373
Fgf14:chr14:124268563	Adar	-0.47305	0.120373
Tmem131:chr1:36794190	Adar	0.47305	0.120373
Ilkap:chr1:91376305	Adar	-0.47305	0.120373
Gfm1:chr3:67443567	Adar	-0.47305	0.120373
Mgp:chr6:136875798	Adar	0.47305	0.120373
Sh2b1:chr7:126471231	Adar	0.47305	0.120373
Scarf1:chr11:75521959	Adar	0.47305	0.120373
Herc1:chr9:66486939	Adar	-0.47305	0.120373
Lonp1:chr17:56620338	Adar	-0.47305	0.120373
2900026A02Rik:chr5:113089450	Adar	-0.47305	0.120373
Zfp512:chr5:31480973	Adar	-0.47305	0.120373
Sptbn2:chr19:4744509	Adar	0.47305	0.120373
Gm29650:chrY:1048564	Adar	0.47305	0.120373
Gm49336:chr14:60219483	Adar	0.47305	0.120373
Cdk13:chr13:17804365	Adar	-0.472855	0.120547
Wipi2:chr5:142668135	Adar	0.472855	0.120547
Myo1e:chr9:70383954	Adar	0.472855	0.120547
Snapc1l:chr12:73946427	Adar	0.472855	0.120547
Mapk11:chr15:89144706	Adar	0.472212	0.121123
Dcun1d3:chr7:119856235	Adar	0.471843	0.121455
Ankrd28:chr14:31701485	Adar	0.471537	0.12173
Daxx:chr17:33915190	Adar	0.470132	0.122999
Sntb2:chr8:107017534	Adar	0.470132	0.122999
Abi1:chr2:23011647	Adar	0.470132	0.122999
4930453N24Rik:chr16:64762649	Adar	0.470132	0.122999
Serinc3:chr2:163627155	Adar	0.469353	0.123706
Zkscan3:chr13:21389958	Adar	-0.46858	0.12441
Slc6a6:chr6:91758167	Adar	0.468531	0.124455
Nrxn1:chr17:90858613	Adar	0.468531	0.124455
Palm:chr10:79818908	Adar	0.468531	0.124455
Mpeg1:chr19:12464262	Adar	-0.468531	0.124455
Armc6:chr8:70220468	Adar	0.46788	0.125051
Map1lc3b:chr8:121595299	Adar	-0.46788	0.125051
Dusp8:chr7:142081303	Adar	0.46788	0.125051
Ankrd28:chr14:31701385	Adar	0.467113	0.125755
Paqr5:chr9:61955675	Adar	0.465971	0.126807
Pxmp4:chr2:154586610	Adar	0.46585	0.126919
Ppp1r15b:chr1:133138018	Adar	0.46585	0.126919
Eapp:chr12:54671755	Adar	-0.46585	0.126919
Upf3b:chrX:37093163	Adar	-0.465627	0.127126
Ahsa2:chr11:23489325	Adar	-0.464948	0.127756
Zdhhc5:chr2:84689133	Adar	0.464948	0.127756
Tut7:chr13:59819826	Adar	0.4648	0.127893
1110051M20Rik:chr2:91340891	Adar	0.464073	0.12857
Snhg11:chr2:158383547	Adar	0.464073	0.12857
Ttc9c:chr19:8810511	Adar	0.463978	0.128658
Caprin1:chr2:103766488	Adar	0.463734	0.128886
Mrpl24:chr3:87921474	Adar	-0.463161	0.129422
Blcap:chr2:157558140	Adar	-0.462347	0.130186
Grcc10:chr6:124739661	Adar	-0.462347	0.130186
Dnajc5:chr2:181555043	Adar	-0.462299	0.130232
Kpnb1:chr11:97165472	Adar	0.462299	0.130232
Grik5:chr7:25068474	Adar	0.462299	0.130232
Map2k1:chr9:64191614	Adar	-0.462299	0.130232
Ubqln1:chr13:58177476	Adar	0.462299	0.130232
Uqcc1:chr2:155851459	Adar	0.462299	0.130232
Lage3:chrX:74352939	Adar	-0.462299	0.130232
Lama5:chr2:180207027	Adar	-0.462299	0.130232
Mxra7:chr11:116806877	Adar	-0.462299	0.130232
Prepl:chr17:85078503	Adar	0.462299	0.130232
Rps6ka4:chr19:6830601	Adar	-0.462299	0.130232
Agfg1:chr1:82886407	Adar	-0.462299	0.130232
Atg16l1:chr1:87789463	Adar	-0.462299	0.130232
Srgap2:chr1:131295309	Adar	-0.462299	0.130232
Wipi2:chr5:142663127	Adar	-0.462299	0.130232
Dnajc13:chr9:104162720	Adar	-0.462299	0.130232
Pnpla8:chr12:44299263	Adar	-0.462299	0.130232
Ttyh3:chr5:140627192	Adar	-0.462299	0.130232
Maml1:chr11:50256122	Adar	0.462299	0.130232
Galnt2l:chr8:122889704	Adar	-0.462299	0.130232
Syne1:chr10:5172910	Adar	-0.462299	0.130232
Bvht:chr18:61647133	Adar	0.462299	0.130232
Eng:chr2:32674750	Adar	0.462099	0.13042
Pea15a:chr1:172197069	Adar	0.461538	0.130948
Akap8:chr17:32304590	Adar	0.461538	0.130948
Slc39a10:chr1:46808679	Adar	0.461538	0.130948
Lix1l:chr3:96624315	Adar	0.461538	0.130948
Grrp1:chr4:134251508	Adar	0.461538	0.130948
Dnajc1:chr2:18214615	Adar	-0.461538	0.130948
Acvrl1:chr15:101142072	Adar	0.460463	0.131966
Cdc25b:chr2:131194158	Adar	-0.460082	0.132328
Dnajb12:chr10:59897976	Adar	0.459652	0.132737
Nuak1:chr10:84372602	Adar	-0.458947	0.133409
Appl2:chr10:83630295	Adar	0.458947	0.133409
Zc3h14:chr12:98774308	Adar	-0.458947	0.133409
Cox14:chr15:99728268	Adar	-0.458947	0.133409
Isg20l2:chr3:87939632	Adar	0.458947	0.133409
Rhoa:chr9:108337339	Adar	0.458845	0.133507
Eapp:chr12:54671908	Adar	-0.458845	0.133507
Meg3:chr12:109547644	Adar	-0.458572	0.133768
Odf2:chr2:29925150	Adar	0.457758	0.134549
Ncl:chr1:86345161	Adar	-0.457758	0.134549
Ipo4:chr14:55626500	Adar	0.457651	0.134652
Actl6b:chr5:137568775	Adar	0.456822	0.13545
Dnajc1:chr2:18214653	Adar	-0.455588	0.136644
Ppp1r15b:chr1:133137161	Adar	0.455344	0.13688
Psme2:chr14:55588745	Adar	0.455344	0.13688
Paip2:chr18:35608760	Adar	0.455044	0.137172
Prxl2c:chr13:64290310	Adar	-0.454545	0.137658
Slfn5:chr11:82963254	Adar	0.454545	0.137658
Selenot:chr3:58590823	Adar	0.454545	0.137658
Snhg11:chr2:158383535	Adar	0.454545	0.137658
Fndc3a:chr14:72539271	Adar	0.45349	0.138689
Pqbp1:chrX:7895749	Adar	0.453425	0.138753
N4bp2l2:chr5:150638268	Adar	-0.452322	0.139837
Spag9:chr11:94123081	Adar	0.452284	0.139875
Dtx3l:chr16:35926832	Adar	0.452284	0.139875
Dlgap1:chr17:70142227	Adar	-0.452029	0.140126
Furin:chr7:80389736	Adar	0.452029	0.140126
Ddx6:chr9:44638191	Adar	0.452029	0.140126
Wwtr1:chr3:57458061	Adar	0.45184	0.140313
Gng7:chr10:80949087	Adar	-0.45184	0.140313
Lix1l:chr3:96624322	Adar	0.45184	0.140313
Smad5:chr13:56741661	Adar	-0.451612	0.140538
LTO1:chr7:144920439	Adar	-0.45127	0.140876
Atxn3:chr12:101921631	Adar	-0.450715	0.141425
Meg3:chr12:109546744	Adar	-0.450715	0.141425
Tsn:chr1:118299610	Adar	0.450715	0.141425
Prxl2c:chr13:64290302	Adar	-0.450418	0.141721
Skiv2l:chr17:34846569	Adar	0.449768	0.142367
Ajuba:chr14:54567717	Adar	-0.449571	0.142564
Pou2f1:chr1:165867123	Adar	0.449571	0.142564
Zdhhc21:chr4:82799407	Adar	0.449571	0.142564
Slc35e2:chr4:155621487	Adar	0.449571	0.142564
Elavl3:chr9:22037099	Adar	0.44933	0.142805
Mrpl24:chr3:87921500	Adar	-0.44933	0.142805
Klhl21:chr4:152017548	Adar	-0.44933	0.142805
Git1:chr11:77507342	Adar	0.44847	0.143665
Ankrd28:chr14:31700920	Adar	0.44847	0.143665
Sp3:chr2:72937237	Adar	0.448337	0.143798
Ehd1:chr19:6299418	Adar	0.448337	0.143798
Resf1:chr6:149335105	Adar	0.44788	0.144257
Ptprj:chr2:90548589	Adar	0.447552	0.144586
Igfbp7:chr5:77407783	Adar	-0.447552	0.144586
Slfn5:chr11:82963633	Adar	0.447552	0.144586
Rpl7l1:chr17:46775081	Adar	0.447552	0.144586
Psma5:chr3:108279268	Adar	-0.446786	0.145359
Unc5b:chr10:60764372	Adar	-0.445035	0.147135
Heatr3:chr8:88171225	Adar	0.445035	0.147135
Ncl:chr1:86345916	Adar	-0.444834	0.147339
Tom1l2:chr11:60228714	Adar	0.444486	0.147694
Rnf166:chr8:122470736	Adar	-0.444486	0.147694
Kbtbd2:chr6:56778454	Adar	0.444486	0.147694
Stxbp2:chr8:3640585	Adar	0.444462	0.147719
Apopt1:chr12:111734070	Adar	-0.444147	0.14804
Abhd2:chr7:79360848	Adar	-0.443673	0.148525
Actl6b:chr5:137568749	Adar	0.442319	0.149915
Ccnd2:chr6:127130221	Adar	0.442108	0.150133
Ccs:chr19:4826437	Adar	0.441548	0.150711
Ykt6:chr11:5967569	Adar	-0.441351	0.150915
Rab8b:chr9:66844522	Adar	0.441351	0.150915
Sntb2:chr8:107017749	Adar	-0.441351	0.150915
Son:chr16:91656086	Adar	-0.441332	0.150935
Selenop:chr15:3279954	Adar	0.441332	0.150935
Iws1:chr18:32102911	Adar	-0.441332	0.150935
Nol10:chr12:17429853	Adar	0.441332	0.150935
Mier3:chr13:111717718	Adar	0.441332	0.150935
Zfp267:chr3:36169706	Adar	-0.441295	0.150973
Paip1:chr13:119429073	Adar	-0.441009	0.151269
Hdac11:chr6:91174467	Adar	-0.441009	0.151269
Ugp2:chr11:21329085	Adar	-0.440797	0.151489
Fam50a:chrX:74314927	Adar	-0.440797	0.151489
Plekha3:chr2:76682770	Adar	0.440797	0.151489
Kctd2:chr11:115420154	Adar	-0.440797	0.151489
Trim35:chr14:66307032	Adar	-0.440797	0.151489
Pdzd2:chr15:12365660	Adar	0.440797	0.151489
Mtdh:chr15:34131243	Adar	0.440797	0.151489
Rnf19a:chr15:36240756	Adar	0.440797	0.151489
Mmut:chr17:40955122	Adar	-0.440797	0.151489
Ptprj:chr2:90444502	Adar	0.440797	0.151489
Vps4a:chr8:107040923	Adar	0.440797	0.151489
Abhd12:chr2:150846252	Adar	-0.440797	0.151489
Syncrip:chr9:88462344	Adar	-0.440797	0.151489
Prr5l:chr2:101741351	Adar	0.440797	0.151489
Ascc1:chr10:60004861	Adar	-0.440797	0.151489
Srsf11:chr3:158031643	Adar	0.440797	0.151489
Chd4:chr6:125101971	Adar	0.440797	0.151489
Msi2:chr11:88347081	Adar	0.440797	0.151489
Heatr6:chr11:83782147	Adar	-0.44059	0.151704
Cpd:chr11:76781872	Adar	0.44059	0.151704
Csnk1a1:chr18:61588509	Adar	0.44059	0.151704
Mpeg1:chr19:12463521	Adar	0.44059	0.151704
Gm49380:chr9:44095430	Adar	0.44059	0.151704
Ccnd2:chr6:127125380	Adar	-0.440559	0.151735
Htra1:chr7:130985524	Adar	-0.440559	0.151735
Son:chr16:91656133	Adar	0.440559	0.151735
Atp10a:chr7:58663736	Adar	-0.440559	0.151735
Snhg11:chr2:158383976	Adar	0.440559	0.151735
Irak2:chr6:113694585	Adar	0.440559	0.151735
Nol10:chr12:17429618	Adar	0.440559	0.151735
Arhgef15:chr11:68951736	Adar	0.440559	0.151735
Mmgt1:chrX:56587643	Adar	-0.438599	0.153779
Scube1:chr15:83656467	Adar	0.438587	0.153791
Dynll1:chr5:115299242	Adar	0.437829	0.154586
Iqgap1:chr7:80712098	Adar	0.437829	0.154586
Cops4:chr5:100547099	Adar	0.437829	0.154586
Psmb1:chr17:15475865	Adar	0.437829	0.154586
Ebna1bp2:chr4:118626080	Adar	0.437829	0.154586
Fam32a:chr8:72223799	Adar	-0.437407	0.15503
Mapk1ip1l:chr14:47320790	Adar	0.436688	0.155788
Ncl:chr1:86345160	Adar	-0.436688	0.155788
Mxd4:chr5:34173967	Adar	-0.436688	0.155788
Dtx3l:chr16:35928508	Adar	0.436688	0.155788
Ilrun:chr17:27820455	Adar	0.436688	0.155788
Csnk2a1:chr2:152273022	Adar	-0.436631	0.155849
Nfat5:chr8:107371341	Adar	0.436631	0.155849
Cacfd1:chr2:27020980	Adar	0.436631	0.155849
Stx1a:chr5:135050173	Adar	-0.435068	0.157504
Tcf12:chr9:71845702	Adar	0.435068	0.157504
Rhoa:chr9:108337269	Adar	0.434326	0.158294
Sirt4:chr5:115478734	Adar	-0.434232	0.158394
Malt1:chr18:65477160	Adar	0.434232	0.158394
Nrp1:chr8:128503215	Adar	-0.433815	0.15884
Mrgbp:chr2:180585727	Adar	0.433733	0.158928
Tpd52l2:chr2:181515406	Adar	0.433566	0.159106
Dusp3:chr11:101972669	Adar	0.433566	0.159106
Cp:chr3:19989064	Adar	-0.433566	0.159106
Prxl2c:chr13:64290180	Adar	-0.433566	0.159106
Rhpn2:chr7:35391627	Adar	-0.433566	0.159106
Pcdh9:chr14:93201698	Adar	-0.433566	0.159106
Purb:chr11:6468175	Adar	0.433566	0.159106
Lactb2:chr1:13625738	Adar	0.433566	0.159106
Mdc1:chr17:35858625	Adar	0.433566	0.159106
Gemin8:chrX:166189996	Adar	0.433109	0.159595
Sfxn2:chr19:46596343	Adar	0.43295	0.159766
Sdf4:chr4:156012671	Adar	-0.43295	0.159766
Rbbp4:chr4:129309993	Adar	-0.43295	0.159766
Ptp4a2:chr4:129848670	Adar	0.432688	0.160048
Sv2a:chr3:96194692	Adar	-0.432688	0.160048
Dlg2:chr7:91193934	Adar	0.432688	0.160048
Haus2:chr2:120620269	Adar	-0.431582	0.161238
Snapin:chr3:90489205	Adar	-0.431411	0.161423
Lbr:chr1:181816078	Adar	0.431411	0.161423
Ralgds:chr2:28544179	Adar	0.431411	0.161423
Fbxo42:chr4:141203721	Adar	0.431411	0.161423
Rchy1:chr5:91959391	Adar	0.431411	0.161423
Tmem168:chr6:13582426	Adar	0.431411	0.161423
Prpf6:chr2:181654488	Adar	-0.430824	0.162058
Polr3f:chr2:144539899	Adar	-0.430824	0.162058
Nrg1:chr8:32454566	Adar	0.430824	0.162058
Dleu2:chr14:61618368	Adar	-0.430673	0.162221
Eef1g:chr19:8976876	Adar	-0.430352	0.162569
Ltbp1:chr17:75390404	Adar	0.430045	0.162902
Axl:chr7:25761455	Adar	-0.430045	0.162902
Tnr:chr1:159573571	Adar	-0.430045	0.162902
Nin:chr12:70019254	Adar	0.430045	0.162902
Zkscan3:chr13:21392376	Adar	-0.430045	0.162902
Golm1:chr13:59638352	Adar	-0.430045	0.162902
Dab2:chr15:6431011	Adar	-0.430045	0.162902
Hadha:chr5:30132256	Adar	0.430045	0.162902
Dst:chr1:34249526	Adar	0.430045	0.162902
Atad3a:chr4:155746048	Adar	0.430045	0.162902
Rilpl2:chr5:124469716	Adar	-0.430045	0.162902
Gatc:chr5:115333530	Adar	-0.430045	0.162902
Eif2s3x:chrX:94211746	Adar	0.430045	0.162902
Itga1:chr13:114982848	Adar	0.430045	0.162902
Tmem11:chr11:60864783	Adar	-0.430045	0.162902
Trim34a:chr7:104261312	Adar	0.430045	0.162902
Pcdhga5:chr18:37703129	Adar	0.430045	0.162902
Gtf3c3:chr1:54397361	Adar	0.429825	0.163141
Scd1:chr19:44396424	Adar	0.429588	0.163399
Kif1c:chr11:70731229	Adar	0.429218	0.163802
Dffa:chr4:149118148	Adar	-0.42889	0.16416
Gna11:chr10:81530060	Adar	-0.42889	0.16416
Cldn12:chr5:5505727	Adar	0.428527	0.164556
Lamp2:chrX:38405342	Adar	0.428073	0.165053
Gm10687:chr9:44123872	Adar	0.427321	0.165877
Nr3c1:chr18:39410975	Adar	0.427114	0.166105
Cds2:chr2:132307287	Adar	-0.427114	0.166105
Cox14:chr15:99729380	Adar	0.426573	0.1667
Phc2:chr4:128752175	Adar	0.426573	0.1667
Tra2a:chr6:49254628	Adar	-0.426573	0.1667
Itm2a:chrX:107397563	Adar	0.426573	0.1667
Eapp:chr12:54672285	Adar	-0.426573	0.1667
Ino80d:chr1:63049607	Adar	0.426573	0.1667
Isg20l2:chr3:87940165	Adar	0.426573	0.1667
Iws1:chr18:32102895	Adar	-0.425486	0.167901
Ncl:chr1:86345270	Adar	0.425486	0.167901
Zscan26:chr13:21443023	Adar	-0.424564	0.168924
Iqgap1:chr7:80712391	Adar	0.423819	0.169753
Rasgrp2:chr19:6415047	Adar	-0.423555	0.170048
Zkscan3:chr13:21392375	Adar	-0.422546	0.171176
Tpr:chr1:150439230	Adar	0.422232	0.171528
Ankrd28:chr14:31700024	Adar	0.422232	0.171528
Ankrd28:chr14:31701519	Adar	0.422232	0.171528
Zdhhc18:chr4:133608148	Adar	0.422232	0.171528
Esf1:chr2:140168114	Adar	0.422232	0.171528
Phf5a:chr15:81865772	Adar	0.422232	0.171528
Pkdcc:chr17:83215570	Adar	-0.42201	0.171777
Nacc1:chr8:84671484	Adar	-0.421092	0.17281
Dync1li1:chr9:114723600	Adar	-0.421092	0.17281
Dtx3l:chr16:35928050	Adar	0.421092	0.17281
Cttnbp2nl:chr3:105003548	Adar	0.421092	0.17281
Ptprj:chr2:90548573	Adar	-0.420566	0.173403
Itih5:chr2:10252144	Adar	-0.420566	0.173403
Stard8:chrX:99074517	Adar	-0.420566	0.173403
Atpif1:chr4:132531102	Adar	0.420566	0.173403
Csnk1a1:chr18:61588394	Adar	0.420316	0.173686
Ccnd2:chr6:127128300	Adar	0.420206	0.17381
Dlgap1:chr17:70142423	Adar	-0.420206	0.17381
Shank3:chr15:89547935	Adar	0.420206	0.17381
Plekhh2:chr17:84621768	Adar	-0.420206	0.17381
Rnf14:chr18:38298322	Adar	0.420206	0.17381
Dusp3:chr11:101972551	Adar	-0.41958	0.174519
Slc44a1:chr4:53565519	Adar	0.41958	0.174519
Bpgm:chr6:34504850	Adar	0.41958	0.174519
Abhd2:chr7:79360769	Adar	0.41958	0.174519
Slc44a1:chr4:53565891	Adar	-0.41958	0.174519
Ist1:chr8:109676492	Adar	0.418856	0.175342
Pttg1:chr11:43420697	Adar	-0.418021	0.176293
Cabp1:chr5:115177176	Adar	-0.417726	0.17663
Slc6a20a:chr9:123642152	Adar	0.416813	0.177675
Sez6l2:chr7:126965012	Adar	-0.416458	0.178083
Pank3:chr11:35789318	Adar	0.416436	0.178108
Dleu2:chr14:61618400	Adar	-0.416436	0.178108
Gm29650:chrY:1048552	Adar	-0.416436	0.178108
Itpripl2:chr7:118485368	Adar	0.416046	0.178557
Caskin2:chr11:115799595	Adar	-0.415503	0.179182
Ube2d3:chr3:135466004	Adar	0.415503	0.179182
Itga5:chr15:103350957	Adar	-0.413919	0.181015
Agpat3:chr10:78285114	Adar	0.413919	0.181015
Il13ra1:chrX:36170623	Adar	-0.413919	0.181015
Tomm34:chr2:164064970	Adar	0.413919	0.181015
Myo1b:chr1:51776302	Adar	-0.413919	0.181015
Cabin1:chr10:75726914	Adar	-0.413919	0.181015
Papola:chr12:105809361	Adar	-0.413919	0.181015
Ercc4:chr16:13144467	Adar	-0.413919	0.181015
Kansl2:chr15:98522676	Adar	-0.413919	0.181015
Ndufa10:chr1:92470979	Adar	0.413919	0.181015
Adgrb2:chr4:129992823	Adar	0.413919	0.181015
Cdr2:chr7:120957724	Adar	-0.413919	0.181015
Zranb1:chr7:132984599	Adar	-0.413919	0.181015
Nadsyn1:chr7:143805960	Adar	-0.413919	0.181015
Hinfp:chr9:44292620	Adar	0.413919	0.181015
Lmo7:chr14:101884338	Adar	-0.413919	0.181015
Mcrs1:chr15:99249436	Adar	-0.413919	0.181015
Hps4:chr5:112363190	Adar	-0.413919	0.181015
Dot1l:chr10:80793513	Adar	-0.413919	0.181015
Zfp760:chr17:21725156	Adar	-0.413919	0.181015
Inafm1:chr7:16273552	Adar	0.413919	0.181015
Rab14:chr2:35180731	Adar	0.413311	0.181721
Iqgap1:chr7:80712040	Adar	0.413311	0.181721
Rhpn2:chr7:35391581	Adar	-0.413294	0.181741
Fam32a:chr8:72224064	Adar	-0.413053	0.182022
Pradc1:chr6:85448001	Adar	-0.413053	0.182022
5031425E22Rik:chr5:23424706	Adar	0.413053	0.182022
Iws1:chr18:32102968	Adar	-0.412909	0.182189
Zfp811:chr17:32796133	Adar	0.412877	0.182227
Grik5:chr7:25010650	Adar	0.412587	0.182564
Slc35e1:chr8:72481409	Adar	-0.412587	0.182564
Lactb2:chr1:13625036	Adar	-0.412587	0.182564
Nras:chr3:103066726	Adar	0.412587	0.182564
Phc2:chr4:128752199	Adar	0.412587	0.182564
Iqgap1:chr7:80712366	Adar	0.412587	0.182564
Bmpr2:chr1:59874901	Adar	0.411377	0.18398
Rhoa:chr9:108336305	Adar	-0.410529	0.184975
Calcrl:chr2:84332905	Adar	0.409808	0.185824
Son:chr16:91665206	Adar	0.409317	0.186404
Acvrl1:chr15:101142088	Adar	-0.408461	0.187418
Rap2c:chrX:51004898	Adar	0.408461	0.187418
Zfp397:chr18:23960628	Adar	-0.407725	0.188292
Grin1:chr2:25300741	Adar	-0.407725	0.188292
Eapp:chr12:54671695	Adar	-0.407637	0.188396
Tgoln1:chr6:72608984	Adar	0.40702	0.189131
Slc35e1:chr8:72482673	Adar	0.406824	0.189365
Tpd52l2:chr2:181515407	Adar	0.406305	0.189985
Etfbkmt:chr6:149150873	Adar	0.406064	0.190274
Purb:chr11:6472245	Adar	-0.406064	0.190274
Fam219a:chr4:41518712	Adar	0.405594	0.190836
Gabpb2:chr3:95183941	Adar	-0.405594	0.190836
H2-T24:chr17:36006441	Adar	-0.405594	0.190836
Phc2:chr4:128751948	Adar	0.405594	0.190836
Isg20l2:chr3:87940164	Adar	0.405594	0.190836
Arid5b:chr10:68094042	Adar	0.405496	0.190954
Snrpd2:chr7:19152680	Adar	-0.405496	0.190954
Mmgt1:chrX:56587363	Adar	0.405096	0.191434
AW011738:chr4:156209631	Adar	0.404224	0.192484
Ppp1r9b:chr11:94991945	Adar	-0.403897	0.192878
Arrb1:chr7:99605006	Adar	-0.403874	0.192906
Dph7:chr2:24968907	Adar	-0.403874	0.192906
Synpo:chr18:60603701	Adar	0.403874	0.192906
Ddx49:chr8:70298939	Adar	-0.403874	0.192906
Tnip2:chr5:34499232	Adar	0.403874	0.192906
Ipo7:chr7:110052796	Adar	-0.403874	0.192906
Ptprr:chr10:116274457	Adar	-0.403565	0.19328
Stip1:chr19:7032641	Adar	-0.403565	0.19328
Fbxo7:chr10:86024641	Adar	-0.403168	0.19376
Armc6:chr8:70220655	Adar	0.403168	0.19376
Trappc2l:chr8:122614171	Adar	0.403168	0.19376
Cdk17:chr10:93218069	Adar	0.403168	0.19376
Sf3a2:chr10:80803631	Adar	0.403168	0.19376
Cdc34:chr10:79682408	Adar	0.403168	0.19376
Faf2:chr13:54652122	Adar	0.403168	0.19376
Rab11fip1:chr8:27154879	Adar	-0.403168	0.19376
Cactin:chr10:81323980	Adar	-0.403168	0.19376
Polr3k:chr2:181868681	Adar	0.403168	0.19376
Marchf6:chr15:31462067	Adar	-0.403168	0.19376
Osbpl6:chr2:76588620	Adar	-0.403168	0.19376
Ehd2:chr7:15948183	Adar	0.403168	0.19376
Bvht:chr18:61647423	Adar	0.403168	0.19376
Ctdsp1:chr1:74395901	Adar	-0.403092	0.193852
Cox7b:chrX:106019025	Adar	0.403092	0.193852
Slc7a2:chr8:40920192	Adar	-0.402803	0.194202
Septin2:chr1:93509128	Adar	0.401418	0.195884
Mrpl24:chr3:87921700	Adar	0.400002	0.197614
R3hdm2:chr10:127467377	Adar	0.400002	0.197614
Rab27a:chr9:73096679	Adar	0.399364	0.198398
Prpf6:chr2:181654471	Adar	-0.399359	0.198403
Trim12a:chr7:104308058	Adar	-0.399316	0.198457
Gnl3l:chrX:150983814	Adar	0.3993	0.198476
Tpm4:chr8:72152641	Adar	0.3993	0.198476
Snx4:chr16:33271939	Adar	0.398813	0.199075
Stk38:chr17:28971780	Adar	-0.398813	0.199075
Dusp11:chr6:85955365	Adar	0.39864	0.199288
Ttyh3:chr5:140622619	Adar	0.39864	0.199288
Grcc10:chr6:124739687	Adar	-0.39864	0.199288
Rpa1:chr11:75301040	Adar	-0.398601	0.199335
Mrpl24:chr3:87921511	Adar	0.398601	0.199335
Pwwp2a:chr11:43682112	Adar	-0.398601	0.199335
Nfia:chr4:98118563	Adar	-0.398601	0.199335
Cdh20:chr1:104781972	Adar	-0.398601	0.199335
Mfap1a:chr2:121492797	Adar	0.398601	0.199335
Trim25:chr11:89018041	Adar	0.397698	0.20045
Ppp1r7:chr1:93367056	Adar	-0.397698	0.20045
Akr1a1:chr4:116637316	Adar	0.397698	0.20045
Tpp1:chr7:105745826	Adar	-0.397698	0.20045
Prkar1b:chr5:139017873	Adar	0.396494	0.201942
Nol10:chr12:17429666	Adar	0.396494	0.201942
Abcd4:chr12:84602728	Adar	-0.395932	0.20264
Atl3:chr19:7535245	Adar	0.395797	0.202808
Abcg2:chr6:58685421	Adar	0.395797	0.202808
Ptprj:chr2:90548315	Adar	0.395797	0.202808
4930447C04Rik:chr12:72906436	Adar	0.395627	0.20302
Appbp2:chr11:85189023	Adar	0.395244	0.203498
Ptprj:chr2:90548325	Adar	-0.395244	0.203498
Cep68:chr11:20228242	Adar	-0.395244	0.203498
Exoc5:chr14:49006661	Adar	-0.395244	0.203498
Rangap1:chr15:81704696	Adar	-0.39508	0.203702
Nek7:chr1:138486875	Adar	0.39508	0.203702
Cacng8:chr7:3415139	Adar	-0.39508	0.203702
Nol10:chr12:17429895	Adar	0.39508	0.203702
1110051M20Rik:chr2:91298675	Adar	0.395077	0.203706
Nmi:chr2:51955970	Adar	0.394695	0.204183
Cpne3:chr4:19521000	Adar	0.394695	0.204183
Sh3glb1:chr3:144686917	Adar	-0.394658	0.204229
H2-T24:chr17:36006440	Adar	-0.394376	0.204582
Cpne7:chr8:123132056	Adar	-0.393465	0.205723
Gabpb2:chr3:95186186	Adar	-0.393042	0.206256
Mdc1:chr17:35858607	Adar	-0.392985	0.206327
Gmpr2:chr14:55675360	Adar	0.392416	0.207043
Cic:chr7:25286868	Adar	-0.392416	0.207043
Ska2:chr11:87123530	Adar	0.392416	0.207043
Fam193b:chr13:55564532	Adar	0.392416	0.207043
Dapk1:chr13:60760654	Adar	-0.392416	0.207043
Ogdhl:chr14:32344766	Adar	0.392416	0.207043
Ppp3cc:chr14:70247597	Adar	0.392416	0.207043
Gabbr1:chr17:37048462	Adar	-0.392416	0.207043
Smad4:chr18:73640146	Adar	0.392416	0.207043
Coq4:chr2:29790504	Adar	0.392416	0.207043
Arrdc1:chr2:24925658	Adar	-0.392416	0.207043
Tln1:chr4:43553516	Adar	0.392416	0.207043
Psmd9:chr5:123228419	Adar	0.392416	0.207043
Vps35:chr8:85264316	Adar	-0.392416	0.207043
Gnb5:chr9:75314318	Adar	0.392416	0.207043
Exoc3:chr13:74170293	Adar	-0.392416	0.207043
Ppp1r21:chr17:88583929	Adar	-0.392416	0.207043
Ermard:chr17:15059920	Adar	-0.392416	0.207043
Kat7:chr11:95276465	Adar	0.392416	0.207043
Trappc9:chr15:72808925	Adar	-0.392416	0.207043
Zkscan3:chr13:21389919	Adar	-0.3923	0.207191
Slc7a2:chr8:40917799	Adar	-0.392295	0.207197
Sntb2:chr8:107017736	Adar	0.392295	0.207197
Ccnd2:chr6:127130220	Adar	0.392295	0.207197
Slfn5:chr11:82963491	Adar	-0.392295	0.207197
Mdc1:chr17:35858890	Adar	0.392295	0.207197
Suz12:chr11:80033842	Adar	0.391895	0.207702
Nrip3:chr7:109758663	Adar	-0.391608	0.208063
Ctnnal1:chr4:56811245	Adar	0.391608	0.208063
Abhd2:chr7:79360851	Adar	0.391608	0.208063
Limd1:chr9:123520968	Adar	-0.391608	0.208063
Cbx6:chr15:79824895	Adar	-0.391608	0.208063
Gm10687:chr9:44124099	Adar	-0.391521	0.208174
B4galt5:chr2:167300427	Adar	0.391083	0.208728
Vcam1:chr3:116118444	Adar	0.391083	0.208728
2610002M06Rik:chrX:107784363	Adar	0.391083	0.208728
Appl2:chr10:83611553	Adar	0.3899	0.210231
Serpinb9:chr13:33017548	Adar	0.3899	0.210231
Mkln1:chr6:31515730	Adar	0.389476	0.21077
Gm10557:chr18:4198657	Adar	0.389476	0.21077
Kif3c:chr12:3404616	Adar	-0.388938	0.211457
Derl1:chr15:57870727	Adar	-0.388792	0.211643
Tra2a:chr6:49254627	Adar	0.388667	0.211804
Arhgef25:chr10:127189576	Adar	-0.38865	0.211824
Mgat1:chr11:49250649	Adar	-0.38865	0.211824
Lcp1:chr14:75230682	Adar	0.38865	0.211824
Mcts1:chrX:38610168	Adar	0.387962	0.212706
Dpp10:chr1:124518989	Adar	-0.387962	0.212706
Eapp:chr12:54671984	Adar	0.387334	0.213512
Mettl3:chr14:52295422	Adar	-0.387334	0.213512
Lbp:chr2:158331549	Adar	0.387233	0.213641
Gria2:chr3:80687791	Adar	0.386923	0.21404
Dcun1d3:chr7:119853535	Adar	0.386923	0.21404
Per1:chr11:69106904	Adar	0.385516	0.215854
Nrp1:chr8:128359564	Adar	-0.385516	0.215854
Edem2:chr2:155713024	Adar	-0.385516	0.215854
Pmpca:chr2:26396539	Adar	0.38529	0.216147
Pank3:chr11:35786804	Adar	0.385198	0.216265
Gnb4:chr3:32584118	Adar	0.384615	0.21702
Itm2a:chrX:107397635	Adar	0.384615	0.21702
Gabpb2:chr3:95183940	Adar	-0.384615	0.21702
Coro2b:chr9:62424143	Adar	0.384615	0.21702
Hjurp:chr1:88263988	Adar	0.384615	0.21702
Tspan2:chr3:102771031	Adar	0.384615	0.21702
Plxna1:chr6:89316778	Adar	0.384615	0.21702
Nebl:chr2:17348286	Adar	0.384615	0.21702
4930453N24Rik:chr16:64762269	Adar	0.384615	0.21702
Clic1:chr17:35057952	Adar	0.38443	0.217261
Spag9:chr11:94123685	Adar	0.38443	0.217261
Spred1:chr2:117179975	Adar	0.384402	0.217296
Meg3:chr12:109563754	Adar	-0.38431	0.217416
Pmpca:chr2:26396024	Adar	0.38431	0.217416
Sp3:chr2:72938227	Adar	0.38431	0.217416
Ackr3:chr1:90215660	Adar	0.382762	0.219432
Rab4b:chr7:27169962	Adar	-0.382102	0.220296
Gm29609:chr5:31173481	Adar	-0.382102	0.220296
Spag9:chr11:94123672	Adar	0.381787	0.220708
Ovca2:chr11:75176346	Adar	0.381787	0.220708
Htr2c:chrX:147195693	Adar	0.381787	0.220708
9930104L06Rik:chr4:124944301	Adar	0.381787	0.220708
Psma3:chr12:70995210	Adar	0.381787	0.220708
Nrg1:chr8:32454545	Adar	-0.381787	0.220708
Jade2:chr11:51814158	Adar	0.381787	0.220708
Cox7b:chrX:106018805	Adar	-0.381787	0.220708
Iqgap1:chr7:80712038	Adar	0.381787	0.220708
Itga3:chr11:95051468	Adar	-0.381665	0.220867
Susd2:chr10:75637557	Adar	-0.381665	0.220867
Timm23:chr14:32189197	Adar	-0.381665	0.220867
Mtrex:chr13:112905020	Adar	-0.381665	0.220867
Sptlc2:chr12:87306196	Adar	0.381665	0.220867
Nek4:chr14:30988072	Adar	-0.381665	0.220867
Lats2:chr14:57703015	Adar	-0.381665	0.220867
Smc3:chr19:53618118	Adar	0.381665	0.220867
Map4k4:chr1:40000586	Adar	-0.381665	0.220867
Dst:chr1:34249895	Adar	-0.381665	0.220867
Eif4g3:chr4:138126548	Adar	0.381665	0.220867
Mad2l2:chr4:148140801	Adar	0.381665	0.220867
Smg1:chr7:118167955	Adar	-0.381665	0.220867
Sh2b1:chr7:126471139	Adar	-0.381665	0.220867
Prps1:chrX:140467728	Adar	0.381665	0.220867
Plpbp:chr8:27053294	Adar	0.381665	0.220867
Fndc4:chr5:31293721	Adar	0.381665	0.220867
Kdm3b:chr18:34838097	Adar	0.381665	0.220867
Fndc3b:chr3:27467395	Adar	0.381665	0.220867
Krcc1:chr6:71284032	Adar	-0.381665	0.220867
Meak7:chr8:119760193	Adar	0.381458	0.221139
Urb2:chr8:124047800	Adar	0.380967	0.221784
Wipi2:chr5:142669276	Adar	0.380967	0.221784
Calcrl:chr2:84332785	Adar	0.380698	0.222138
Ncl:chr1:86345221	Adar	-0.380291	0.222673
Dtx3l:chr16:35928017	Adar	0.378602	0.224906
Sez6l2:chr7:126965242	Adar	-0.378284	0.225327
Nt5dc3:chr10:86837287	Adar	0.378284	0.225327
Nrip3:chr7:109758675	Adar	0.37777	0.22601
N4bp2l2:chr5:150638225	Adar	-0.377719	0.226078
Septin2:chr1:93508882	Adar	0.377622	0.226206
Nfia:chr4:98118562	Adar	0.377622	0.226206
Flt1:chr5:147638519	Adar	0.377622	0.226206
Hnrnpc:chr14:52074530	Adar	0.377622	0.226206
Gm49394:chr7:142653194	Adar	0.377622	0.226206
Bmpr2:chr1:59873116	Adar	0.377622	0.226206
Gm49320:chr8:4247385	Adar	-0.377622	0.226206
Smo:chr6:29761244	Adar	-0.377284	0.226656
Icam1:chr9:21020593	Adar	0.377284	0.226656
Stat3:chr11:100888377	Adar	0.377059	0.226956
Tmem175:chr5:108634059	Adar	-0.377059	0.226956
Scpep1:chr11:88930300	Adar	0.376337	0.22792
Mettl3:chr14:52295434	Adar	-0.376337	0.22792
Marchf5:chr19:37219796	Adar	0.376337	0.22792
Ppig:chr2:69749807	Adar	-0.376337	0.22792
Setd1a:chr7:127788348	Adar	0.376337	0.22792
Ncl:chr1:86350105	Adar	0.375441	0.229118
Sfxn2:chr19:46596349	Adar	0.375086	0.229594
Cox14:chr15:99729381	Adar	0.374782	0.230003
Rnf168:chr16:32299859	Adar	-0.374782	0.230003
Mier1:chr4:103165414	Adar	0.374782	0.230003
Hdlbp:chr1:93407030	Adar	0.374782	0.230003
Selenot:chr3:58590311	Adar	-0.374782	0.230003
Ccs:chr19:4826685	Adar	0.374579	0.230275
E2f4:chr8:105303447	Adar	-0.374441	0.23046
Larp1:chr11:58060831	Adar	0.374441	0.23046
Rassf1:chr9:107561159	Adar	0.374304	0.230645
Apold1:chr6:134984264	Adar	0.373912	0.231173
Meg3:chr12:109563710	Adar	-0.373249	0.232068
Reck:chr4:43943442	Adar	0.373249	0.232068
Cachd1:chr4:101004063	Adar	0.373233	0.232089
Ocel1:chr8:71373689	Adar	0.371279	0.234737
Mapk1ip1l:chr14:47319978	Adar	0.371279	0.234737
Slc7a2:chr8:40920562	Adar	0.371279	0.234737
Rmnd1:chr10:4403323	Adar	-0.371213	0.234827
Cdk9:chr2:32708634	Adar	0.371201	0.234843
Tekt1:chr11:72344951	Adar	0.370914	0.235233
Abcd4:chr12:84613984	Adar	-0.370914	0.235233
Gls:chr1:52232656	Adar	0.370914	0.235233
Rgl1:chr1:152521393	Adar	0.370914	0.235233
Ube2j1:chr4:33051659	Adar	-0.370914	0.235233
Cachd1:chr4:101002883	Adar	-0.370914	0.235233
Cul1:chr6:47502550	Adar	-0.370914	0.235233
Pik3c2a:chr7:116339359	Adar	0.370914	0.235233
Xaf1:chr11:72307345	Adar	0.370914	0.235233
Dtx3l:chr16:35928455	Adar	0.370914	0.235233
Bloc1s4:chr5:36748065	Adar	0.370914	0.235233
Fryl:chr5:73050329	Adar	0.370914	0.235233
Sh2d5:chr4:138260060	Adar	0.370629	0.235621
Gnl3l:chrX:150983779	Adar	-0.370629	0.235621
Mkln1:chr6:31515758	Adar	-0.370629	0.235621
Iqgap1:chr7:80712378	Adar	-0.370629	0.235621
Agl:chr3:116744163	Adar	-0.370629	0.235621
Rab8b:chr9:66844910	Adar	0.370629	0.235621
Srpk1:chr17:28592868	Adar	-0.370385	0.235954
Sdc3:chr4:130822819	Adar	-0.370281	0.236096
Amotl2:chr9:102731975	Adar	0.370281	0.236096
A4galt:chr15:83226948	Adar	-0.370239	0.236153
Gpx3:chr11:54910080	Adar	-0.369808	0.236742
Lap3:chr5:45512447	Adar	-0.369808	0.236742
Magi2:chr5:19335816	Adar	0.369501	0.237162
Lmtk3:chr7:45793823	Adar	-0.369501	0.237162
Vcl:chr14:21022057	Adar	0.367776	0.239528
Son:chr16:91655620	Adar	0.367776	0.239528
C2cd2:chr16:97857319	Adar	0.367305	0.240177
Cdh23:chr10:60370511	Adar	-0.367158	0.24038
Dnttip1:chr2:164766866	Adar	-0.367158	0.24038
Tor1a:chr2:30961122	Adar	-0.367158	0.24038
Plekha2:chr8:25059240	Adar	0.367158	0.24038
Idh3a:chr9:54601162	Adar	-0.367158	0.24038
Lrrc61:chr6:48569733	Adar	-0.367158	0.24038
Gm10687:chr9:44123972	Adar	-0.367158	0.24038
Hsp90aa1:chr12:110696285	Adar	0.366857	0.240795
Ubfd1:chr7:122081159	Adar	0.366606	0.241142
Nrg1:chr8:32454512	Adar	0.366606	0.241142
Xpo7:chr14:70665348	Adar	-0.366506	0.24128
Sdf4:chr4:156010675	Adar	-0.366506	0.24128
Ankrd28:chr14:31700922	Adar	0.366206	0.241694
Leprot:chr4:101658240	Adar	-0.366206	0.241694
Cox7b:chrX:106019042	Adar	0.365768	0.2423
Sgsm3:chr15:81011514	Adar	-0.365768	0.2423
Sfxn2:chr19:46595207	Adar	0.365314	0.24293
2900026A02Rik:chr5:113088048	Adar	-0.364274	0.244376
Lamp2:chrX:38420487	Adar	0.363636	0.245265
Rab1a:chr11:20225186	Adar	0.363636	0.245265
Flnb:chr14:7937112	Adar	0.363636	0.245265
Flnb:chr14:7937138	Adar	0.363636	0.245265
Cdc42ep4:chr11:113727861	Adar	0.363636	0.245265
Zfp704:chr3:9429003	Adar	-0.36333	0.245693
Meg3:chr12:109569317	Adar	0.363047	0.246089
Wdr59:chr8:111450756	Adar	-0.362859	0.246351
Fam219a:chr4:41518497	Adar	0.362759	0.246491
H2-T24:chr17:36006585	Adar	-0.362759	0.246491
Dele1:chr18:38262286	Adar	-0.362557	0.246774
Gm37494:chr7:39569418	Adar	-0.362557	0.246774
Ncl:chr1:86348806	Adar	-0.362044	0.247493
Atxn1:chr13:45680218	Adar	0.362044	0.247493
Kif3c:chr12:3404648	Adar	-0.362036	0.247504
Pdhb:chr14:8166012	Adar	0.362036	0.247504
Il15ra:chr2:11722982	Adar	0.362036	0.247504
Usb1:chr8:95346963	Adar	0.36196	0.247611
Gm29650:chrY:1048535	Adar	-0.361406	0.248389
Fbxo7:chr10:86046798	Adar	0.360163	0.25014
Eef2kmt:chr16:5244486	Adar	0.360163	0.25014
Dlg1:chr16:31842788	Adar	-0.360163	0.25014
Coa5:chr1:37418218	Adar	-0.360163	0.25014
Trip12:chr1:84782838	Adar	0.360163	0.25014
Crtc2:chr3:90260790	Adar	-0.360163	0.25014
Itpr1:chr6:108473427	Adar	0.360163	0.25014
Pak4:chr7:28562588	Adar	-0.360163	0.25014
Bcar1:chr8:111713647	Adar	0.360163	0.25014
Tmem87a:chr2:120359540	Adar	0.360163	0.25014
Foxj1:chr11:116331935	Adar	-0.360163	0.25014
Dusp8:chr7:142081160	Adar	-0.360163	0.25014
Lrp1:chr10:127549930	Adar	-0.360163	0.25014
Cd2bp2:chr7:127195629	Adar	-0.360163	0.25014
Prpf4:chr4:62411729	Adar	0.360163	0.25014
C1qtnf9:chr14:60772457	Adar	0.360163	0.25014
Fam219a:chr4:41518719	Adar	0.359802	0.25065
Mtmr6:chr14:60300830	Adar	-0.358708	0.252199
Son:chr16:91655587	Adar	-0.358708	0.252199
Ociad1:chr5:73312433	Adar	0.358708	0.252199
Dtx3l:chr16:35928484	Adar	0.358708	0.252199
Ddx39b:chr17:35252530	Adar	-0.357979	0.253234
Tbc1d20:chr2:152313794	Adar	-0.357979	0.253234
Hsdl2:chr4:59618202	Adar	0.357979	0.253234
Ppp1r16b:chr2:158765099	Adar	0.357979	0.253234
Atp5b:chr10:128087348	Adar	0.357897	0.253351
Cbfa2t2:chr2:154537930	Adar	-0.357897	0.253351
Scarb1:chr5:125278776	Adar	-0.3578	0.25349
Mettl7a1:chr15:100313971	Adar	-0.3578	0.25349
Ppp1r16b:chr2:158765532	Adar	-0.357268	0.254246
Rnpep:chr1:135275613	Adar	0.357268	0.254246
Socs7:chr11:97398013	Adar	0.357268	0.254246
Rprd2:chr3:95760865	Adar	0.356911	0.254756
Gabpb2:chr3:95184744	Adar	0.356911	0.254756
Fam32a:chr8:72223582	Adar	0.356643	0.255138
Rnf168:chr16:32300361	Adar	0.356643	0.255138
Nrxn1:chr17:90858633	Adar	0.356643	0.255138
Tbc1d24:chr17:24176489	Adar	0.356643	0.255138
Snhg11:chr2:158384122	Adar	0.356643	0.255138
Zbtb6:chr2:37425938	Adar	0.356643	0.255138
Flt1:chr5:147638520	Adar	0.356643	0.255138
Ncl:chr1:86347927	Adar	-0.356575	0.255236
Gnb4:chr3:32582400	Adar	0.356275	0.255664
Abcg2:chr6:58685422	Adar	0.355928	0.25616
Grin1:chr2:25300761	Adar	0.355306	0.257052
Gm37494:chr7:39567644	Adar	-0.355306	0.257052
Nid1:chr13:13511937	Adar	0.35528	0.257089
Trim12c:chr7:104339283	Adar	-0.35528	0.257089
Ap2a2:chr7:141629284	Adar	0.354787	0.257796
Ift22:chr5:136911731	Adar	-0.354787	0.257796
Septin10:chr10:59192183	Adar	-0.354787	0.257796
Anapc16:chr10:59988523	Adar	0.354787	0.257796
Nxn:chr11:76278487	Adar	0.354787	0.257796
Npc2:chr12:84755694	Adar	0.354787	0.257796
Ubr2:chr17:46930425	Adar	-0.354787	0.257796
Hspa4l:chr3:40795451	Adar	-0.354787	0.257796
Kat14:chr2:144373201	Adar	-0.354787	0.257796
Far2:chr6:148159711	Adar	0.354787	0.257796
Synm:chr7:67733363	Adar	0.354787	0.257796
Zyg11b:chr4:108230955	Adar	0.354787	0.257796
Ermard:chr17:15056765	Adar	-0.354787	0.257796
Zic4:chr9:91372635	Adar	-0.354787	0.257796
Josd2:chr7:44470330	Adar	0.354787	0.257796
Smc1a:chrX:152029242	Adar	-0.354787	0.257796
Adck2:chr6:39586853	Adar	-0.354787	0.257796
Khnyn:chr14:55894367	Adar	0.354787	0.257796
Gas8:chr8:123534710	Adar	-0.354571	0.258107
Ctdsp1:chr1:74396315	Adar	-0.354518	0.258184
Pbx1:chr1:168156652	Adar	0.354518	0.258184
Acp2:chr2:91213288	Adar	-0.353766	0.259267
Meg3:chr12:109547961	Adar	-0.353766	0.259267
Smad4:chr18:73639208	Adar	0.353766	0.259267
Ntan1:chr16:13833959	Adar	-0.353639	0.259449
Lmtk2:chr5:144187080	Adar	-0.353639	0.259449
Dusp11:chr6:85954818	Adar	-0.353009	0.260359
Slc9a3r2:chr17:24641137	Adar	-0.352369	0.261285
Mettl3:chr14:52295239	Adar	-0.352343	0.261322
Magt1:chrX:105970066	Adar	-0.352343	0.261322
Csad:chr15:102177332	Adar	-0.35091	0.263403
Dtx3l:chr16:35928065	Adar	0.35091	0.263403
Gm16201:chr7:139952766	Adar	-0.35091	0.263403
Rpl22:chr4:152332980	Adar	-0.350879	0.263447
Ro60:chr1:143755378	Adar	0.350347	0.264222
Man2a2:chr7:80349696	Adar	0.350263	0.264344
Dact3:chr7:16885834	Adar	0.350263	0.264344
Mrpl24:chr3:87921684	Adar	0.34965	0.265239
Iws1:chr18:32102966	Adar	-0.34965	0.265239
Colec12:chr18:9882421	Adar	-0.34965	0.265239
Slc35e2:chr4:155621903	Adar	-0.34965	0.265239
Isg20l2:chr3:87940376	Adar	-0.34965	0.265239
Hdhd5:chr6:120509764	Adar	0.34965	0.265239
Psma3:chr12:70995214	Adar	0.34965	0.265239
St3gal1:chr15:67103550	Adar	0.34965	0.265239
Dnal1:chr12:84143036	Adar	-0.34965	0.265239
Tra2a:chr6:49260965	Adar	-0.349443	0.265541
Mbd4:chr6:115841075	Adar	0.34922	0.265868
Ppp2r5c:chr12:110580444	Adar	-0.3488	0.266483
Rb1:chr14:73239705	Adar	0.3488	0.266483
Atg3:chr16:45178236	Adar	0.3488	0.266483
Atp5b:chr10:128087926	Adar	0.3488	0.266483
Prpf38b:chr3:108903092	Adar	0.3488	0.266483
Lmna:chr3:88482042	Adar	-0.3488	0.266483
Vps11:chr9:44356241	Adar	-0.3488	0.266483
Ndufa3:chr7:3620156	Adar	-0.3488	0.266483
Mospd3:chr5:137597295	Adar	0.3488	0.266483
Tmx2:chr2:84671440	Adar	-0.3488	0.266483
Zfand2a:chr5:139472234	Adar	-0.3488	0.266483
Col8a1:chr16:57625362	Adar	0.3488	0.266483
Lrrc32:chr7:98498273	Adar	0.3488	0.266483
Gm49380:chr9:44106500	Adar	-0.3488	0.266483
Ddx39b:chr17:35251808	Adar	-0.348055	0.267576
Icam1:chr9:21020566	Adar	-0.348055	0.267576
Slc35e2:chr4:155621944	Adar	-0.348055	0.267576
Zbtb6:chr2:37426555	Adar	0.348055	0.267576
Tra2a:chr6:49259083	Adar	-0.3478	0.267949
Ccnd2:chr6:127128281	Adar	0.347768	0.267997
Nrxn3:chr12:90020907	Adar	-0.347553	0.268313
Cpd:chr11:76781880	Adar	-0.347107	0.268969
Gbf1:chr19:46274097	Adar	0.346761	0.269479
Zfp811:chr17:32796508	Adar	0.346761	0.269479
Snhg11:chr2:158383930	Adar	-0.346761	0.269479
Dcun1d3:chr7:119856266	Adar	0.346761	0.269479
Midn:chr10:80157528	Adar	0.345878	0.270783
Ovca2:chr11:75177359	Adar	0.345079	0.271965
Amotl2:chr9:102731776	Adar	-0.34406	0.273477
Eapp:chr12:54671944	Adar	-0.34406	0.273477
Plekha3:chr2:76675497	Adar	0.344036	0.273513
Xab2:chr8:3619017	Adar	0.344036	0.273513
Pofut2:chr10:77266968	Adar	-0.344036	0.273513
Appl2:chr10:83630296	Adar	0.344036	0.273513
Cfap36:chr11:29247089	Adar	0.344036	0.273513
Carmil3:chr14:55507937	Adar	-0.344036	0.273513
Pkdcc:chr17:83215711	Adar	-0.344036	0.273513
Smc3:chr19:53641911	Adar	0.344036	0.273513
Hgs:chr11:120477184	Adar	0.344036	0.273513
Irak1:chrX:74023125	Adar	-0.344036	0.273513
C2cd2l:chr9:44314935	Adar	-0.344036	0.273513
Myo1e:chr9:70370414	Adar	-0.344036	0.273513
Ncoa7:chr10:30645762	Adar	0.344036	0.273513
Gtpbp1:chr15:79719207	Adar	0.344036	0.273513
Cep164:chr9:45775359	Adar	0.344036	0.273513
Tubb2b:chr13:34128518	Adar	0.344036	0.273513
Brox:chr1:183285042	Adar	-0.344036	0.273513
Aup1:chr6:83057258	Adar	0.344036	0.273513
Pcgf1:chr6:83080572	Adar	0.344036	0.273513
Ppp3cc:chr14:70218581	Adar	-0.343258	0.274671
Bfar:chr16:13702636	Adar	-0.343258	0.274671
Tmpo:chr10:91164130	Adar	-0.343112	0.274889
Rel:chr11:23737221	Adar	0.343112	0.274889
Jade2:chr11:51814188	Adar	0.343112	0.274889
Fbxl17:chr17:63499597	Adar	-0.343112	0.274889
Zbtb7b:chr3:89379232	Adar	-0.343112	0.274889
Ppp1r15b:chr1:133137165	Adar	0.343112	0.274889
Pmpca:chr2:26396028	Adar	0.342657	0.275567
Nras:chr3:103066090	Adar	-0.342657	0.275567
Cacng8:chr7:3415084	Adar	0.342657	0.275567
Spock2:chr10:60133278	Adar	0.342657	0.275567
Spock2:chr10:60133279	Adar	0.342657	0.275567
Sppl2a:chr2:126891151	Adar	0.342657	0.275567
Bin1:chr18:32428081	Adar	0.342165	0.276303
Tfrc:chr16:32632730	Adar	-0.341691	0.277012
Tmem106b:chr6:13085299	Adar	-0.341691	0.277012
LTO1:chr7:144920388	Adar	-0.341158	0.277812
Slc7a2:chr8:40920556	Adar	0.340954	0.278118
Abca3:chr17:24404123	Adar	-0.340803	0.278344
Cd93:chr2:148438198	Adar	0.340803	0.278344
Zgpat:chr2:181365693	Adar	-0.340649	0.278576
Pfas:chr11:68985936	Adar	-0.340353	0.279021
Azi2:chr9:118062624	Adar	0.340353	0.279021
Nt5dc3:chr10:86837260	Adar	-0.339755	0.27992
Vasp:chr7:19257206	Adar	-0.339755	0.27992
Gls:chr1:52187388	Adar	0.339642	0.280091
Cpne7:chr8:123133310	Adar	0.339642	0.280091
Atp13a2:chr4:141002917	Adar	-0.339621	0.280123
Gnpnat1:chr14:45376686	Adar	-0.339621	0.280123
Smim14:chr5:65485818	Adar	-0.339621	0.280123
Pwwp2a:chr11:43682397	Adar	-0.339621	0.280123
Foxo3:chr10:42275461	Adar	0.339621	0.280123
Psma5:chr3:108279865	Adar	0.339621	0.280123
Ankrd28:chr14:31701484	Adar	-0.338746	0.281443
Magi2:chr5:20246582	Adar	-0.338746	0.281443
Ptpn12:chr5:20994197	Adar	0.338638	0.281607
Mbd4:chr6:115841062	Adar	-0.338132	0.282373
Nek4:chr14:30988146	Adar	-0.337834	0.282823
Mgat4a:chr1:37443155	Adar	0.337813	0.282855
Tmem69:chr4:116552808	Adar	0.336844	0.284326
Ggps1:chr13:14052036	Adar	0.336253	0.285226
Dcun1d3:chr7:119856268	Adar	0.336253	0.285226
Icam1:chr9:21020569	Adar	-0.33591	0.285749
Zdhhc8:chr16:18222992	Adar	-0.33591	0.285749
Mdc1:chr17:35858914	Adar	-0.33591	0.285749
Tgfb2:chr1:186625152	Adar	0.335708	0.286056
Zkscan3:chr13:21389999	Adar	-0.335664	0.286123
Fam219a:chr4:41518514	Adar	0.335664	0.286123
Cap1:chr4:122859880	Adar	-0.335664	0.286123
Rhpn2:chr7:35391298	Adar	-0.335664	0.286123
Ovca2:chr11:75177471	Adar	0.335664	0.286123
Slfn5:chr11:82963642	Adar	0.335664	0.286123
Eif2s3y:chrY:1016394	Adar	0.335664	0.286123
Gm29650:chrY:1048565	Adar	0.335664	0.286123
Dusp3:chr11:101972690	Adar	0.335664	0.286123
Gm29650:chrY:1048604	Adar	0.335664	0.286123
Sap30bp:chr11:115966483	Adar	-0.335314	0.286658
Dnajc18:chr18:35672499	Adar	0.335314	0.286658
Pdcd7:chr9:65346194	Adar	0.335314	0.286658
Foxo4:chrX:101259583	Adar	0.335314	0.286658
Iws1:chr18:32102522	Adar	-0.334573	0.287791
Trim12c:chr7:104339062	Adar	-0.334573	0.287791
Esrra:chr19:6910986	Adar	0.334181	0.288391
Ifitm2:chr7:140955191	Adar	-0.334181	0.288391
Zyg11b:chr4:108233293	Adar	0.333552	0.289355
Nrep:chr18:33437483	Adar	-0.333552	0.289355
Arf3:chr15:98737994	Adar	0.333552	0.289355
Kmt2b:chr7:30571030	Adar	-0.333335	0.289688
Bax:chr7:45466355	Adar	-0.333285	0.289766
Chmp2b:chr16:65545345	Adar	0.333285	0.289766
Mark3:chr12:111627209	Adar	0.333285	0.289766
Unkl:chr17:25230558	Adar	-0.333285	0.289766
Atp2b1:chr10:98994655	Adar	0.333285	0.289766
Plec:chr15:76180000	Adar	0.333285	0.289766
Clcn2:chr16:20709935	Adar	-0.333285	0.289766
Uhmk1:chr1:170198012	Adar	0.333285	0.289766
Herc2:chr7:56097554	Adar	-0.333285	0.289766
Got2:chr8:95877748	Adar	0.333285	0.289766
Dipk1b:chr2:26634843	Adar	0.333285	0.289766
Rnf123:chr9:108063621	Adar	-0.333285	0.289766
Mfap1b:chr2:121461646	Adar	-0.333285	0.289766
Ctu2:chr8:122479629	Adar	-0.333285	0.289766
Sema3b:chr9:107600517	Adar	0.333285	0.289766
Abce1:chr8:79684611	Adar	-0.333285	0.289766
4930511M06Rik:chr18:57427066	Adar	-0.333285	0.289766
Syne1:chr10:5143259	Adar	0.333285	0.289766
Agl:chr3:116744688	Adar	-0.332841	0.290448
Apobec3:chr15:79907523	Adar	0.332837	0.290455
Ddb2:chr2:91234387	Adar	0.33275	0.290588
N4bp2l2:chr5:150638267	Adar	-0.33275	0.290588
Sh3kbp1:chrX:159973949	Adar	0.33275	0.290588
Slc9a3r2:chr17:24641152	Adar	-0.332177	0.291471
Rhbdl1:chr17:25834953	Adar	0.332177	0.291471
Mapk6:chr9:75387202	Adar	0.332138	0.291532
Shoc2:chr19:54032975	Adar	0.331013	0.293268
Tob2:chr15:81849480	Adar	0.331013	0.293268
B3gat3:chr19:8924660	Adar	-0.330549	0.293988
Gpr108:chr17:57243085	Adar	-0.330442	0.294153
Evi5:chr5:107746891	Adar	-0.330442	0.294153
Abi3:chr11:95831784	Adar	-0.330442	0.294153
Pip4k2b:chr11:97715987	Adar	-0.330442	0.294153
Pank3:chr11:35789280	Adar	-0.330442	0.294153
Klc1:chr12:111790916	Adar	-0.330442	0.294153
Eif1ad:chr19:5368453	Adar	-0.330442	0.294153
Dgkz:chr2:91941011	Adar	-0.330442	0.294153
Ppip5k2:chr1:97706599	Adar	0.330442	0.294153
Ublcp1:chr11:44454957	Adar	-0.330442	0.294153
Vav2:chr2:27263706	Adar	-0.329927	0.294952
Ctc1:chr11:69035125	Adar	0.329827	0.295108
Tra2a:chr6:49254769	Adar	-0.329247	0.296007
Iws1:chr18:32102928	Adar	-0.329247	0.296007
Mgat4a:chr1:37442392	Adar	0.329247	0.296007
Slc6a6:chr6:91756491	Adar	0.329247	0.296007
Mdc1:chr17:35858957	Adar	-0.329247	0.296007
Mapk1:chr16:17044641	Adar	-0.329101	0.296235
Luzp1:chr4:136546265	Adar	0.328676	0.296896
Fam76a:chr4:132903984	Adar	0.328676	0.296896
Mindy2:chr9:70601462	Adar	-0.328676	0.296896
Rpa1:chr11:75300985	Adar	-0.328671	0.296904
Taok1:chr11:77536054	Adar	-0.328671	0.296904
Ebna1bp2:chr4:118626808	Adar	0.328671	0.296904
Cog3:chr14:75719719	Adar	-0.328671	0.296904
Bicd2:chr13:49386157	Adar	-0.328671	0.296904
Ino80d:chr1:63048307	Adar	-0.328671	0.296904
Rbbp4:chr4:129309986	Adar	0.328671	0.296904
Rpl7l1:chr17:46774937	Adar	-0.328671	0.296904
Cavin1:chr11:100957958	Adar	-0.328671	0.296904
Pmpca:chr2:26396546	Adar	0.328671	0.296904
Qpctl:chr7:19140327	Adar	0.328671	0.296904
Rab8b:chr9:66844523	Adar	0.328445	0.297257
Noc3l:chr19:38788351	Adar	-0.328055	0.297865
Snrnp48:chr13:38220609	Adar	-0.328055	0.297865
Stx1a:chr5:135050458	Adar	-0.327516	0.298707
Cd74:chr18:60812461	Adar	0.327516	0.298707
Miga2:chr2:30384536	Adar	-0.327516	0.298707
Dtx3l:chr16:35928019	Adar	0.327516	0.298707
Ap3s2:chr7:79875881	Adar	-0.327516	0.298707
Rpl7l1:chr17:46775235	Adar	-0.327516	0.298707
Aida:chr1:183324374	Adar	0.326916	0.299645
Arpc2:chr1:74267434	Adar	0.326894	0.29968
Ncl:chr1:86345210	Adar	-0.326894	0.29968
Ptprj:chr2:90548397	Adar	-0.326839	0.299767
Iqgap1:chr7:80712186	Adar	-0.326301	0.300609
Lemd3:chr10:120924666	Adar	-0.326301	0.300609
1110038F14Rik:chr15:76949309	Adar	0.326301	0.300609
Gm37494:chr7:39567651	Adar	-0.326301	0.300609
Haus2:chr2:120620641	Adar	-0.325745	0.301483
Clk1:chr1:58416392	Adar	0.325745	0.301483
Col18a1:chr10:77078312	Adar	0.324713	0.303107
Nifk:chr1:118333316	Adar	0.324713	0.303107
Gnl2:chr4:125052993	Adar	-0.324713	0.303107
Ubr3:chr2:70022133	Adar	-0.324516	0.303417
Pcmtd1:chr1:7170233	Adar	0.324516	0.303417
Kctd12:chr14:102979186	Adar	0.324516	0.303417
Crkl:chr16:17484777	Adar	0.324483	0.303469
Raph1:chr1:60483657	Adar	-0.324483	0.303469
Acvrl1:chr15:101142077	Adar	0.323952	0.304307
Yipf5:chr18:40212114	Adar	0.323875	0.304428
Gnl3l:chrX:150985462	Adar	-0.322242	0.307014
Ebna1bp2:chr4:118626079	Adar	-0.322242	0.307014
Sntb2:chr8:107018208	Adar	-0.322242	0.307014
Rpa1:chr11:75301022	Adar	0.322242	0.307014
Hinfp:chr9:44292778	Adar	-0.322242	0.307014
Fndc3a:chr14:72539217	Adar	0.322242	0.307014
Snapc1l:chr12:73946380	Adar	0.322242	0.307014
Sod2:chr17:13019564	Adar	-0.321678	0.30791
Mapk1ip1l:chr14:47320777	Adar	0.321678	0.30791
Bfar:chr16:13702637	Adar	-0.321678	0.30791
Cpne7:chr8:123132089	Adar	-0.321678	0.30791
Zfp771:chr7:127254322	Adar	0.321678	0.30791
Selenop:chr15:3280063	Adar	0.321678	0.30791
Fam32a:chr8:72223594	Adar	0.321678	0.30791
Flnb:chr14:7936098	Adar	0.321678	0.30791
Slc6a20a:chr9:123642115	Adar	0.321678	0.30791
St3gal1:chr15:67105663	Adar	0.321263	0.30857
Efr3a:chr15:65873171	Adar	-0.321263	0.30857
Hus1:chr11:8993959	Adar	0.321263	0.30857
Arhgap31:chr16:38601184	Adar	-0.321263	0.30857
Zfand5:chr19:21282023	Adar	0.321263	0.30857
Trp53inp1:chr4:11171014	Adar	0.321263	0.30857
Rab2a:chr4:8597220	Adar	0.321263	0.30857
Sod3:chr5:52368192	Adar	0.321263	0.30857
Gm21811:chr8:20149865	Adar	-0.321	0.308989
Prxl2c:chr13:64290328	Adar	0.32098	0.30902
Adamts10:chr17:33549124	Adar	-0.32098	0.30902
Snhg11:chr2:158384035	Adar	-0.32098	0.30902
Tbc1d24:chr17:24176126	Adar	0.320917	0.309121
Stx1a:chr5:135050158	Adar	0.320355	0.310017
Ptgr2:chr12:84314206	Adar	-0.320355	0.310017
Elavl3:chr9:22037079	Adar	-0.320335	0.310049
Unc5b:chr10:60763059	Adar	-0.320335	0.310049
Dcun1d3:chr7:119856233	Adar	0.320335	0.310049
Nras:chr3:103066806	Adar	-0.319718	0.311035
Magt1:chrX:105969244	Adar	0.319718	0.311035
Rab11fip1:chr8:27139675	Adar	-0.319718	0.311035
Mfap1a:chr2:121492852	Adar	-0.319718	0.311035
Sdc3:chr4:130824678	Adar	-0.31905	0.312104
Fastk:chr5:24444655	Adar	0.31905	0.312104
Scarf1:chr11:75518737	Adar	-0.31905	0.312104
Emcn:chr3:137430935	Adar	-0.31905	0.312104
Rhoa:chr9:108336248	Adar	-0.31874	0.312602
Supt16:chr14:52161202	Adar	-0.31874	0.312602
Gm42878:chr5:121545448	Adar	-0.31874	0.312602
A230103L15Rik:chr7:59329475	Adar	0.31874	0.312602
Pcmtd1:chr1:7172369	Adar	0.31874	0.312602
Cox14:chr15:99729393	Adar	0.317352	0.314831
Arl3:chr19:46538766	Adar	0.317352	0.314831
Flnb:chr14:7937185	Adar	0.317248	0.314998
Gm20721:chr2:174344658	Adar	-0.317248	0.314998
Cpne7:chr8:123132105	Adar	-0.316909	0.315544
Gabpb2:chr3:95183483	Adar	-0.316909	0.315544
Eapp:chr12:54671708	Adar	-0.316909	0.315544
Tsc22d1:chr14:76507750	Adar	0.316776	0.315758
Odf2:chr2:29925446	Adar	-0.316776	0.315758
Arhgef10:chr8:15000823	Adar	-0.316776	0.315758
Mrpl45:chr11:97328664	Adar	-0.316195	0.316696
Ddit4:chr10:59950208	Adar	0.316195	0.316696
Ccdc84:chr9:44411196	Adar	0.315237	0.318245
Tra2a:chr6:49256424	Adar	-0.315237	0.318245
Lactb2:chr1:13625735	Adar	0.314685	0.319139
Sntb2:chr8:107018216	Adar	0.314685	0.319139
Lman1:chr18:65981919	Adar	-0.314685	0.319139
Rab6a:chr7:100639568	Adar	0.314685	0.319139
Deaf1:chr7:141297897	Adar	0.314142	0.32002
Sez6l2:chr7:126965256	Adar	-0.313516	0.321038
Dtx3l:chr16:35926912	Adar	0.313516	0.321038
Rnf11:chr4:109453267	Adar	-0.313217	0.321525
Ovca2:chr11:75176447	Adar	0.313217	0.321525
Pde5a:chr3:122856290	Adar	0.313217	0.321525
Nol10:chr12:17429851	Adar	0.313217	0.321525
Ube2o:chr11:116581137	Adar	-0.312283	0.323048
Zfp811:chr17:32796141	Adar	0.312283	0.323048
Ncl:chr1:86347737	Adar	0.312088	0.323366
Ppard:chr17:28286303	Adar	0.312084	0.323372
Ssr1:chr13:37976490	Adar	-0.312084	0.323372
Arap3:chr18:37989384	Adar	0.312084	0.323372
Smad2:chr18:76305107	Adar	0.312084	0.323372
Tars2:chr3:95741403	Adar	0.312084	0.323372
Atp1a1:chr3:101576395	Adar	0.312084	0.323372
AW011738:chr4:156209942	Adar	-0.312084	0.323372
Daglb:chr5:143503722	Adar	0.312034	0.323453
Sntb2:chr8:107017783	Adar	0.312034	0.323453
Ppard:chr17:28300575	Adar	-0.31192	0.323641
Mydgf:chr17:56176014	Adar	0.31192	0.323641
Tmcc3:chr10:94590754	Adar	-0.31192	0.323641
Sptbn1:chr11:30101758	Adar	0.31192	0.323641
Prxl2c:chr13:64290181	Adar	-0.31192	0.323641
Arsa:chr15:89472651	Adar	0.31192	0.323641
Ncl:chr1:86345239	Adar	0.31192	0.323641
Copa:chr1:172092318	Adar	0.31192	0.323641
B3gnt2:chr11:22835833	Adar	0.31192	0.323641
Reep2:chr18:34846674	Adar	0.311799	0.323838
Ddx39:chr8:83722997	Adar	0.311783	0.323864
Faf1:chr4:109842309	Adar	-0.311783	0.323864
Pnpo:chr11:96939294	Adar	-0.311783	0.323864
Arap3:chr18:37991058	Adar	-0.311783	0.323864
Sp100:chr1:85682406	Adar	0.311783	0.323864
N4bp2l2:chr5:150640820	Adar	0.311783	0.323864
Wbp11:chr6:136817994	Adar	0.311783	0.323864
Dctn5:chr7:122148381	Adar	-0.311783	0.323864
Hspb6:chr7:30554320	Adar	-0.311783	0.323864
Aagab:chr9:63641382	Adar	-0.311783	0.323864
Mob3a:chr10:80686435	Adar	0.311734	0.323944
Srpk1:chr17:28592841	Adar	-0.311734	0.323944
Nebl:chr2:17345431	Adar	-0.311734	0.323944
Serbp1:chr6:67284680	Adar	-0.310402	0.326126
Ggnbp2:chr11:84855603	Adar	-0.31022	0.326425
Xpnpep3:chr15:81456903	Adar	0.31022	0.326425
Adgrf5:chr17:43457386	Adar	-0.309867	0.327005
Pkd2:chr5:104505052	Adar	-0.309658	0.327349
Pdlim7:chr13:55502062	Adar	-0.308774	0.328804
Echs1:chr7:140105792	Adar	0.308754	0.328836
Ywhab:chr2:164017879	Adar	0.308232	0.329698
Grik5:chr7:25010435	Adar	0.307692	0.330589
Nf2:chr11:4767141	Adar	0.307692	0.330589
Snhg11:chr2:158383957	Adar	-0.307692	0.330589
Pcdhgc5:chr18:37840383	Adar	0.307692	0.330589
Timp2:chr11:118303412	Adar	0.307692	0.330589
Dusp11:chr6:85955371	Adar	-0.307692	0.330589
Dagla:chr19:10245733	Adar	-0.307692	0.330589
Hjurp:chr1:88264071	Adar	0.307692	0.330589
Cbx6:chr15:79826435	Adar	0.307692	0.330589
Cdk13:chr13:17804156	Adar	0.30689	0.331917
Stam:chr2:14148057	Adar	0.306663	0.332294
Git1:chr11:77506626	Adar	0.306098	0.33323
Tspan9:chr6:127962451	Adar	-0.306098	0.33323
Ebna1bp2:chr4:118626085	Adar	-0.306051	0.333308
Nrxn1:chr17:90859097	Adar	-0.305265	0.334615
Mlh3:chr12:85235104	Adar	-0.305265	0.334615
Tra2a:chr6:49254768	Adar	-0.304995	0.335064
Meg3:chr12:109562933	Adar	-0.304729	0.335508
Rpl7l1:chr17:46775237	Adar	-0.304729	0.335508
Mdc1:chr17:35858886	Adar	-0.304729	0.335508
Stard8:chrX:99074547	Adar	-0.304729	0.335508
Triobp:chr15:78994097	Adar	-0.304729	0.335508
Sertad1:chr7:27490230	Adar	0.304548	0.33581
Mafk:chr5:139801260	Adar	0.304548	0.33581
Zswim8:chr14:20721561	Adar	-0.304548	0.33581
Arsa:chr15:89472650	Adar	-0.304122	0.33652
Arl3:chr19:46538767	Adar	-0.304122	0.33652
Eng:chr2:32676936	Adar	-0.304122	0.33652
Etfrf1:chr6:145216879	Adar	-0.304122	0.33652
Vat1l:chr8:114373783	Adar	0.304122	0.33652
Ncl:chr1:86347801	Adar	0.303363	0.337789
Uqcr10:chr11:4702401	Adar	0.302923	0.338525
Fam98a:chr17:75538169	Adar	0.302905	0.338554
Slc12a5:chr2:164998957	Adar	-0.302905	0.338554
Notch1:chr2:26460832	Adar	0.302905	0.338554
Glipr2:chr4:43977959	Adar	0.302905	0.338554
Tnfrsf1b:chr4:145213580	Adar	0.302905	0.338554
Foxo1:chr3:52349816	Adar	-0.302905	0.338554
Tmem80:chr7:141336691	Adar	0.302824	0.33869
Laptm4a:chr12:8934441	Adar	-0.302539	0.339168
Sdc3:chr4:130823185	Adar	-0.302539	0.339168
Fam50a:chrX:74315566	Adar	-0.302319	0.339537
Heatr3:chr8:88171864	Adar	0.302319	0.339537
Agtrap:chr4:148079056	Adar	0.30206	0.339972
Ebna1bp2:chr4:118626779	Adar	-0.301226	0.341372
Syngr3:chr17:24686166	Adar	-0.301032	0.3417
Ets2:chr16:95716230	Adar	-0.301032	0.3417
Pacs1:chr19:5144898	Adar	-0.301032	0.3417
Smndc1:chr19:53381335	Adar	0.301032	0.3417
Mrc1:chr2:14321906	Adar	0.301032	0.3417
4933434E20Rik:chr3:90061565	Adar	0.301032	0.3417
Erlin2:chr8:27039129	Adar	0.301032	0.3417
Mtmr2:chr9:13804931	Adar	0.301032	0.3417
Usp4:chr9:108351027	Adar	-0.301032	0.3417
Phldb2:chr16:45808461	Adar	0.301032	0.3417
Gtf2a2:chr9:70016427	Adar	0.300878	0.341959
Eapp:chr12:54672013	Adar	-0.300699	0.34226
Abl1:chr2:31730079	Adar	0.300699	0.34226
Map1lc3a:chr2:155277642	Adar	-0.300699	0.34226
Zcchc7:chr4:44931782	Adar	-0.300699	0.34226
B3gat3:chr19:8924669	Adar	-0.30037	0.342814
Mapre1:chr2:153769899	Adar	0.299553	0.344193
Myl4:chr11:104587109	Adar	-0.299553	0.344193
Bbs1:chr19:4887700	Adar	0.299523	0.344244
Tmem69:chr4:116552204	Adar	-0.299183	0.344819
Sh3pxd2b:chr11:32426574	Adar	0.29898	0.345163
Psmc1:chr12:100113604	Adar	-0.298586	0.345828
Synm:chr7:67732178	Adar	-0.298586	0.345828
Azin1:chr15:38490113	Adar	-0.298586	0.345828
2900026A02Rik:chr5:113088345	Adar	-0.298586	0.345828
Slc3a2:chr19:8710650	Adar	-0.298247	0.346403
Lamc1:chr1:153219407	Adar	-0.298247	0.346403
Rbm27:chr18:42341214	Adar	-0.297857	0.347065
Pdlim7:chr13:55500986	Adar	-0.297724	0.347291
Slc35e2:chr4:155621916	Adar	-0.297724	0.347291
Psma3:chr12:70994629	Adar	0.297724	0.347291
Gm20537:chr9:88453465	Adar	-0.297724	0.347291
Rab14:chr2:35181086	Adar	0.297724	0.347291
Fam20b:chr1:156680479	Adar	-0.297297	0.348017
Ncl:chr1:86347972	Adar	0.29697	0.348572
Zbtb4:chr11:69783131	Adar	-0.296324	0.349672
Haus2:chr2:120620314	Adar	-0.296324	0.349672
Rchy1:chr5:91949146	Adar	0.296324	0.349672
Psmd8:chr7:29176846	Adar	0.296324	0.349672
Flt1:chr5:147613188	Adar	-0.295957	0.350298
Eef1a1:chr9:78478466	Adar	0.295957	0.350298
Cdh22:chr2:165111763	Adar	0.295957	0.350298
Luzp1:chr4:136547286	Adar	-0.295656	0.350811
Stat6:chr10:127659486	Adar	0.295656	0.350811
Dhx40:chr11:86793224	Adar	-0.295656	0.350811
Appbp2:chr11:85190346	Adar	-0.295656	0.350811
Rab4a:chr8:123834114	Adar	-0.295656	0.350811
Mdm2:chr10:117692640	Adar	-0.295656	0.350811
Wbp4:chr14:79467303	Adar	-0.295656	0.350811
Bet1l:chr7:140855128	Adar	0.295656	0.350811
Sgk3:chr1:9886086	Adar	0.295656	0.350811
Plxna2:chr1:194814783	Adar	0.295656	0.350811
Zmynd19:chr2:24953313	Adar	-0.295656	0.350811
Ube3b:chr5:114393091	Adar	-0.295656	0.350811
Tgfa:chr6:86271436	Adar	0.295656	0.350811
Gnao1:chr8:93960328	Adar	-0.295656	0.350811
Mto1:chr9:78473895	Adar	0.295656	0.350811
Sppl2b:chr10:80862242	Adar	-0.295656	0.350811
Osbpl5:chr7:143694308	Adar	-0.295656	0.350811
Arid4b:chr13:14197655	Adar	0.295656	0.350811
Prpf18:chr2:4624364	Adar	0.295656	0.350811
Zc3h10:chr10:128545489	Adar	-0.295656	0.350811
Rnpep:chr1:135271580	Adar	0.295656	0.350811
Rhoj:chr12:75400883	Adar	-0.295656	0.350811
Rps19bp1:chr15:80261021	Adar	-0.295656	0.350811
Zfp277:chr12:40363155	Adar	0.295656	0.350811
Afdn:chr17:13828938	Adar	-0.295656	0.350811
Fgfr1op:chr17:8196307	Adar	0.295656	0.350811
D2hgdh:chr1:93852025	Adar	0.295656	0.350811
[truncated: 3,013 more rows]
