# Supplementary material for: Dynamic A-to-I RNA editing during acute neuroinflammation in sepsis-associated encephalopathy
Source: Front Neurosci. 2024 Aug 2;18:1435185. doi: 10.3389/fnins.2024.1435185 (PMC11328407; doi:10.3389/fnins.2024.1435185)
Supplement: Supplementary file 14 [file Table_8.XLSX]

## Sheet: Sheet1
Table S8. A-to-I RNA editing events in cerebral vessels significantly correlated with Adarb1 expression.
Differential RNA editing event	gene expression	Spearman r	Spearman P
Phc2:chr4:128752175	Adarb1	-0.979021	3.0898e-08
Iqgap1:chr7:80712391	Adarb1	-0.956219	1.1769e-06
Rab1b:chr19:5099790	Adarb1	0.929601	1.20906e-05
Nol10:chr12:17429885	Adarb1	-0.924695	1.67907e-05
Tra2a:chr6:49254628	Adarb1	0.923077	1.8622e-05
Iqgap1:chr7:80712052	Adarb1	-0.888112	0.000114134
Ankrd28:chr14:31701385	Adarb1	-0.884305	0.000134023
Ggps1:chr13:14052089	Adarb1	0.881119	0.000152674
Spock2:chr10:60133279	Adarb1	-0.881119	0.000152674
Rab6a:chr7:100639568	Adarb1	-0.881119	0.000152674
Ube2o:chr11:116581137	Adarb1	0.877198	0.000178339
Dcun1d3:chr7:119856235	Adarb1	-0.873261	0.000207389
Zscan26:chr13:21443023	Adarb1	0.870181	0.000232588
Dnal1:chr12:84143036	Adarb1	0.867133	0.000259812
Scube1:chr15:83656451	Adarb1	0.85114	0.000445901
Iws1:chr18:32102599	Adarb1	0.847637	0.000497797
Acvrl1:chr15:101142077	Adarb1	-0.845091	0.000538366
Iqgap1:chr7:80712098	Adarb1	-0.840632	0.000615569
Slc6a6:chr6:91758167	Adarb1	-0.839161	0.000642826
Ovca2:chr11:75176432	Adarb1	-0.839161	0.000642826
Nol10:chr12:17429859	Adarb1	-0.837129	0.000682001
Selenop:chr15:3280063	Adarb1	-0.832168	0.000785442
Prxl2c:chr13:64290157	Adarb1	0.831007	0.000811316
Bicd2:chr13:49386158	Adarb1	0.829313	0.000850228
1110051M20Rik:chr2:91340891	Adarb1	-0.82663	0.000914801
Son:chr16:91656089	Adarb1	0.825175	0.000951363
Cacng8:chr7:3415084	Adarb1	-0.825175	0.000951363
Spock2:chr10:60133278	Adarb1	-0.825175	0.000951363
Dtx3l:chr16:35926902	Adarb1	-0.818182	0.00114311
Afdn:chr17:13905292	Adarb1	-0.81738	0.00116685
Itm2a:chrX:107397564	Adarb1	-0.816113	0.00120515
Ccnyl1:chr1:64724928	Adarb1	-0.812127	0.001332
Iqgap1:chr7:80712038	Adarb1	-0.802103	0.00169653
Slc6a6:chr6:91757017	Adarb1	-0.797203	0.00190037
2900026A02Rik:chr5:113087496	Adarb1	0.797203	0.00190037
Dlgap1:chr17:70142227	Adarb1	0.79372	0.00205628
Dtx3l:chr16:35927277	Adarb1	-0.790487	0.00220958
Nol10:chr12:17429899	Adarb1	-0.790487	0.00220958
Szrd1:chr4:141113161	Adarb1	-0.790374	0.00221511
Mob3a:chr10:80685913	Adarb1	0.78459	0.0025116
Slfn5:chr11:82963832	Adarb1	-0.78459	0.0025116
Ywhab:chr2:164017031	Adarb1	-0.783789	0.00255489
Prxl2c:chr13:64290310	Adarb1	0.783217	0.00258621
Iws1:chr18:32102966	Adarb1	0.783217	0.00258621
Kif21b:chr1:136177230	Adarb1	0.782166	0.00264443
Dda1:chr8:71474918	Adarb1	0.778006	0.00288491
Scn1b:chr7:31116973	Adarb1	0.776224	0.00299286
Slc35e2:chr4:155621944	Adarb1	0.775872	0.00301455
Atl3:chr19:7535245	Adarb1	-0.774082	0.00312666
Ovca2:chr11:75176384	Adarb1	-0.770579	0.00335518
Gm42878:chr5:121545448	Adarb1	0.770579	0.00335518
Dusp11:chr6:85954818	Adarb1	0.770202	0.00338055
AW011738:chr4:156209631	Adarb1	-0.769782	0.0034089
Sdf4:chr4:156010666	Adarb1	0.769231	0.00344645
Ovca2:chr11:75177424	Adarb1	-0.769231	0.00344645
Lmtk3:chr7:45793823	Adarb1	0.76886	0.00347187
2610002M06Rik:chrX:107784379	Adarb1	-0.768426	0.00350183
Rhoa:chr9:108337269	Adarb1	-0.767076	0.00359618
Iqgap1:chr7:80712404	Adarb1	-0.767076	0.00359618
Abcd4:chr12:84602728	Adarb1	0.766437	0.00364155
Iqgap1:chr7:80712039	Adarb1	-0.764917	0.00375117
Pcdhgc5:chr18:37840383	Adarb1	-0.762238	0.00395045
Fgf14:chr14:124268505	Adarb1	0.762238	0.00395045
Dlg2:chr7:91581063	Adarb1	0.761934	0.00397351
Snrnp48:chr13:38220504	Adarb1	0.761853	0.00397973
Flt1:chr5:147561637	Adarb1	-0.761853	0.00397973
Scg3:chr9:75669381	Adarb1	0.761853	0.00397973
Islr:chr9:58158172	Adarb1	-0.761853	0.00397973
Pvr:chr7:19904481	Adarb1	-0.761853	0.00397973
Miat:chr5:112216710	Adarb1	0.757204	0.00434648
Prxl2c:chr13:64291046	Adarb1	0.756569	0.00439849
Azin1:chr15:38491613	Adarb1	-0.755245	0.00450844
Cfap300:chr9:8022079	Adarb1	-0.75354	0.00465308
Zfp655:chr5:145246018	Adarb1	-0.752674	0.00472788
Trnt1:chr6:106778306	Adarb1	0.752674	0.00472788
Crybg1:chr10:43997537	Adarb1	-0.752674	0.00472788
Spag9:chr11:94123063	Adarb1	-0.752674	0.00472788
Apod:chr16:31304602	Adarb1	-0.752674	0.00472788
Crat:chr2:30405722	Adarb1	0.752674	0.00472788
Slc7a11:chr3:50367713	Adarb1	-0.752674	0.00472788
Dtx3l:chr16:35928048	Adarb1	-0.752674	0.00472788
Gabpb2:chr3:95183561	Adarb1	0.746497	0.00528802
Nt5dc3:chr10:86836339	Adarb1	0.744297	0.00549919
Tpp1:chr7:105745834	Adarb1	0.742734	0.00565303
Rprd1a:chr18:24505993	Adarb1	0.741676	0.005759
Phc2:chr4:128752199	Adarb1	-0.741259	0.00580115
Ovca2:chr11:75177471	Adarb1	-0.741259	0.00580115
Arhgef12:chr9:42966207	Adarb1	-0.741259	0.00580115
Zkscan3:chr13:21389958	Adarb1	0.74101	0.00582639
Ube2b:chr11:51995715	Adarb1	0.739055	0.00602782
Slc36a4:chr9:15741935	Adarb1	0.738231	0.00611433
Nol10:chr12:17429660	Adarb1	-0.737242	0.00621931
Fbxo44:chr4:148153943	Adarb1	0.736401	0.00630963
Dcun1d3:chr7:119856268	Adarb1	-0.735553	0.00640178
Calcrl:chr2:84332785	Adarb1	-0.735269	0.00643281
Acvrl1:chr15:101142072	Adarb1	-0.734632	0.00650289
Sod2:chr17:13017188	Adarb1	-0.734316	0.00653793
Enpp4:chr17:44099438	Adarb1	-0.734316	0.00653793
Bbs2:chr8:94080123	Adarb1	0.734316	0.00653793
Larp1:chr11:58060749	Adarb1	-0.734316	0.00653793
Dtx3l:chr16:35926894	Adarb1	-0.734316	0.00653793
Ywhag:chr5:135909781	Adarb1	-0.734316	0.00653793
Nol10:chr12:17429793	Adarb1	-0.734316	0.00653793
Cbx1:chr11:96807062	Adarb1	-0.734266	0.00654349
Pum2:chr12:8750269	Adarb1	-0.734266	0.00654349
Psma3:chr12:70995211	Adarb1	-0.734266	0.00654349
Rfc2:chr5:134592771	Adarb1	0.733338	0.0066471
U2surp:chr9:95461324	Adarb1	-0.733212	0.00666123
Stx5a:chr19:8746525	Adarb1	0.733012	0.00668381
Jade2:chr11:51814188	Adarb1	-0.733012	0.00668381
Brd4:chr17:32197057	Adarb1	-0.733012	0.00668381
Csad:chr15:102177400	Adarb1	-0.732365	0.00675706
Gm37494:chr7:39569418	Adarb1	0.732365	0.00675706
Slc7a11:chr3:50365128	Adarb1	-0.732241	0.00677118
Ankrd28:chr14:31701375	Adarb1	-0.73205	0.00679293
Dcun1d3:chr7:119856266	Adarb1	-0.73205	0.00679293
Tsc22d1:chr14:76507750	Adarb1	-0.729653	0.0070708
Srpk1:chr17:28592841	Adarb1	0.728548	0.00720175
Sec23b:chr2:144587554	Adarb1	-0.72808	0.00725763
Zkscan3:chr13:21389999	Adarb1	0.727273	0.00735503
Ovca2:chr11:75176383	Adarb1	-0.727273	0.00735503
Slfn5:chr11:82962600	Adarb1	-0.727273	0.00735503
Tmem175:chr5:108634075	Adarb1	-0.72537	0.00758833
Map1lc3b:chr8:121595299	Adarb1	0.725214	0.00760775
Ska2:chr11:87124327	Adarb1	0.725137	0.00761729
Dtx3l:chr16:35928036	Adarb1	-0.725137	0.00761729
Sp3:chr2:72937237	Adarb1	-0.725045	0.00762875
Slfn5:chr11:82963283	Adarb1	-0.725045	0.00762875
Haus2:chr2:120620641	Adarb1	0.721542	0.00807444
Tpm4:chr8:72152641	Adarb1	-0.721542	0.00807444
Azin1:chr15:38491612	Adarb1	-0.72028	0.00823977
Rpl7l1:chr17:46775081	Adarb1	-0.72028	0.00823977
Caskin2:chr11:115799595	Adarb1	0.718328	0.00850036
H2-T24:chr17:36006440	Adarb1	0.718328	0.00850036
Heatr3:chr8:88171868	Adarb1	0.71804	0.00853932
Meg3:chr12:109546089	Adarb1	0.715583	0.00887705
Rxylt1:chr10:122097007	Adarb1	0.713521	0.00916827
Ovca2:chr11:75177459	Adarb1	-0.713287	0.00920178
Arcn1:chr9:44742487	Adarb1	-0.713287	0.00920178
Dleu2:chr14:61617862	Adarb1	-0.711439	0.00946945
Ankrd28:chr14:31701507	Adarb1	-0.711034	0.00952876
Son:chr16:91665209	Adarb1	-0.709618	0.00973881
Pum2:chr12:8750515	Adarb1	-0.708297	0.00993769
Usp45:chr4:21836550	Adarb1	0.708297	0.00993769
Ovca2:chr11:75177367	Adarb1	-0.706294	0.0102452
Rps2:chr17:24721457	Adarb1	0.706294	0.0102452
Slfn5:chr11:82963277	Adarb1	-0.706294	0.0102452
Meg3:chr12:109546744	Adarb1	0.704243	0.0105672
Slfn5:chr11:82962207	Adarb1	-0.704243	0.0105672
Cd93:chr2:148438198	Adarb1	-0.70336	0.0107081
Gng7:chr10:80949113	Adarb1	0.70336	0.0107081
Bbip1:chr19:53932441	Adarb1	0.701967	0.0109333
Dnajc1:chr2:18214661	Adarb1	0.700526	0.0111699
9930104L06Rik:chr4:124943300	Adarb1	0.700526	0.0111699
2010001A14Rik:chr11:57796358	Adarb1	0.699482	0.0113437
Rpa1:chr11:75300985	Adarb1	0.699301	0.0113742
Pkd2:chr5:104504977	Adarb1	-0.699301	0.0113742
Dcun1d3:chr7:119856185	Adarb1	-0.698957	0.0114319
Rhoa:chr9:108336306	Adarb1	-0.69825	0.0115515
Git1:chr11:77507342	Adarb1	-0.697619	0.0116589
Zkscan3:chr13:21389933	Adarb1	0.697619	0.0116589
Tnip2:chr5:34499232	Adarb1	-0.6976	0.0116622
Cpne7:chr8:123132105	Adarb1	0.6972	0.0117306
Rnf168:chr16:32300226	Adarb1	-0.697024	0.011761
Socs7:chr11:97398013	Adarb1	-0.697024	0.011761
Cox7b:chrX:106018981	Adarb1	0.696109	0.011919
Tmem265:chr7:127564789	Adarb1	0.696109	0.011919
Dtx3l:chr16:35928060	Adarb1	-0.694797	0.0121486
Kctd12:chr14:102979192	Adarb1	-0.694797	0.0121486
Afdn:chr17:13905197	Adarb1	-0.694214	0.0122517
Dnajc7:chr11:100597966	Adarb1	0.694022	0.0122857
Spag9:chr11:94123081	Adarb1	-0.694022	0.0122857
Plbd2:chr5:120484047	Adarb1	0.694022	0.0122857
Dusp8:chr7:142079785	Adarb1	-0.693521	0.0123749
Prxl2c:chr13:64290180	Adarb1	0.692308	0.012593
Septin2:chr1:93509088	Adarb1	-0.692308	0.012593
Vamp3:chr4:151048091	Adarb1	-0.692308	0.012593
Cdc42ep4:chr11:113727861	Adarb1	-0.692308	0.012593
Ube2l6:chr2:84809405	Adarb1	0.692308	0.012593
Adgra2:chr8:27085964	Adarb1	0.690158	0.0129864
Rbm27:chr18:42341214	Adarb1	0.690157	0.0129867
Spag9:chr11:94123672	Adarb1	-0.686516	0.0136736
Ptprj:chr2:90548315	Adarb1	-0.686516	0.0136736
Iws1:chr18:32102542	Adarb1	0.685315	0.013906
Prxl2c:chr13:64290351	Adarb1	0.685315	0.013906
Cisd2:chr3:135406870	Adarb1	0.685315	0.013906
Rnf168:chr16:32299779	Adarb1	0.681607	0.0146417
Nek7:chr1:138486875	Adarb1	-0.679823	0.0150058
Spock2:chr10:60133920	Adarb1	-0.679511	0.0150702
Ube2l6:chr2:84809493	Adarb1	0.679511	0.0150702
Isg20l2:chr3:87940333	Adarb1	-0.679284	0.0151171
Mapk11:chr15:89144684	Adarb1	0.679284	0.0151171
Serpinb9:chr13:33017548	Adarb1	-0.678426	0.0152956
Gnl3l:chrX:150983816	Adarb1	-0.678322	0.0153173
Smg5:chr3:88352191	Adarb1	0.676073	0.0157928
Tor1a:chr2:30961125	Adarb1	0.676073	0.0157928
Lbp:chr2:158331487	Adarb1	0.673748	0.0162958
Nol10:chr12:17429884	Adarb1	-0.672505	0.0165693
Abcg2:chr6:58677412	Adarb1	0.67182	0.0167217
Slfn5:chr11:82963254	Adarb1	-0.671329	0.0168315
Dync1li1:chr9:114723600	Adarb1	0.670628	0.0169891
Zfp771:chr7:127254262	Adarb1	0.670628	0.0169891
Ddx23:chr15:98652014	Adarb1	0.670063	0.0171168
Rnf38:chr4:44128224	Adarb1	-0.670063	0.0171168
Ankrd28:chr14:31700931	Adarb1	-0.668087	0.0175694
Gnl2:chr4:125052993	Adarb1	0.668087	0.0175694
2900026A02Rik:chr5:113087495	Adarb1	0.668087	0.0175694
2900026A02Rik:chr5:113088345	Adarb1	0.668087	0.0175694
Nup155:chr15:8158190	Adarb1	0.666693	0.017894
St3gal1:chr15:67103611	Adarb1	-0.665682	0.018132
Arpc5l:chr2:39012508	Adarb1	0.665674	0.0181341
Rab6a:chr7:100639962	Adarb1	-0.665674	0.0181341
Mcur1:chr13:43538584	Adarb1	0.664355	0.0184481
Slc39a10:chr1:46808679	Adarb1	-0.664336	0.0184527
Spock2:chr10:60132705	Adarb1	-0.664336	0.0184527
Parp12:chr6:39092298	Adarb1	0.661998	0.0190195
Marchf5:chr19:37219796	Adarb1	-0.660884	0.0192937
Nr3c1:chr18:39413188	Adarb1	-0.660884	0.0192937
Nrgn:chr9:37545599	Adarb1	0.660884	0.0192937
Dele1:chr18:38262286	Adarb1	0.659854	0.0195502
Kif3c:chr12:3404616	Adarb1	0.658203	0.0199662
Pih1d1:chr7:45156075	Adarb1	0.657353	0.020183
Fndc3a:chr14:72539271	Adarb1	-0.657353	0.020183
Kctd12:chr14:102979186	Adarb1	-0.657353	0.020183
Flnb:chr14:7937112	Adarb1	-0.657343	0.0201855
Bpgm:chr6:34504850	Adarb1	-0.657343	0.0201855
Caprin1:chr2:103765252	Adarb1	-0.657343	0.0201855
Meg3:chr12:109547626	Adarb1	0.655032	0.0207834
Nsmce4a:chr7:130547259	Adarb1	0.655032	0.0207834
Kif5b:chr18:6201433	Adarb1	-0.654908	0.0208158
Tmco6:chr18:36741293	Adarb1	0.653192	0.0212685
Dlk2:chr17:46297959	Adarb1	0.653192	0.0212685
Myh11:chr16:14245228	Adarb1	-0.652636	0.0214168
Azi2:chr9:118062623	Adarb1	-0.652636	0.0214168
Slc9a8:chr2:167475546	Adarb1	0.65149	0.0217247
Lrrc8d:chr5:105797683	Adarb1	0.650444	0.0220086
Rala:chr13:17882491	Adarb1	0.650444	0.0220086
Apobec3:chr15:79908304	Adarb1	-0.650444	0.0220086
Pten:chr19:32818014	Adarb1	0.650444	0.0220086
Gfap:chr11:102893498	Adarb1	0.650444	0.0220086
Snrnp48:chr13:38220201	Adarb1	0.650444	0.0220086
Carmil3:chr14:55503867	Adarb1	0.650444	0.0220086
Tarbp2:chr15:102518566	Adarb1	0.650444	0.0220086
Slc37a1:chr17:31350226	Adarb1	-0.650444	0.0220086
Epb41l3:chr17:69287722	Adarb1	0.650444	0.0220086
Fas:chr19:34314341	Adarb1	-0.650444	0.0220086
Cers6:chr2:69113978	Adarb1	-0.650444	0.0220086
Hmgcs2:chr3:98299176	Adarb1	0.650444	0.0220086
Slc44a1:chr4:53567076	Adarb1	0.650444	0.0220086
Ppt1:chr4:122858320	Adarb1	-0.650444	0.0220086
Zbtb8a:chr4:129353851	Adarb1	0.650444	0.0220086
Etv6:chr6:134040239	Adarb1	-0.650444	0.0220086
Nomo1:chr7:46045901	Adarb1	0.650444	0.0220086
Sbf1:chr15:89299785	Adarb1	0.650444	0.0220086
Gas8:chr8:123534723	Adarb1	0.650444	0.0220086
Tm7sf3:chr6:146634403	Adarb1	0.650444	0.0220086
Arhgef1:chr7:24921979	Adarb1	-0.650444	0.0220086
Meis3:chr7:16182097	Adarb1	0.650444	0.0220086
Lhfp:chr3:53041665	Adarb1	0.650444	0.0220086
Zfp217:chr2:170110045	Adarb1	-0.650444	0.0220086
Taf9:chr13:100655458	Adarb1	0.650444	0.0220086
Oip5os1:chr2:119601730	Adarb1	0.650444	0.0220086
Tspan14:chr14:40907022	Adarb1	-0.65035	0.0220342
Psma3:chr12:70995214	Adarb1	-0.65035	0.0220342
Klhl24:chr16:20124386	Adarb1	0.6502	0.022075
Gas8:chr8:123534710	Adarb1	0.649426	0.0222874
Zfp652:chr11:95770496	Adarb1	0.649426	0.0222874
Rpa1:chr11:75301008	Adarb1	0.649055	0.0223895
Zfp397:chr18:23960628	Adarb1	0.649032	0.022396
Meg3:chr12:109547961	Adarb1	0.647987	0.0226858
As3mt:chr19:46720448	Adarb1	0.64775	0.0227518
Mtmr3:chr11:4488617	Adarb1	0.64775	0.0227518
Miga2:chr2:30384536	Adarb1	0.647234	0.0228964
Oas1b:chr5:120823934	Adarb1	-0.647234	0.0228964
Dennd5b:chr6:148989307	Adarb1	0.647234	0.0228964
Ro60:chr1:143755378	Adarb1	-0.646473	0.0231105
Gls:chr1:52187388	Adarb1	-0.645693	0.0233316
Cped1:chr6:22065302	Adarb1	0.645693	0.0233316
Cacna1a:chr8:84639652	Adarb1	0.644871	0.0235663
Ptgr2:chr12:84314356	Adarb1	0.644871	0.0235663
Nrg1:chr8:32454545	Adarb1	0.644484	0.0236773
Rnf168:chr16:32300332	Adarb1	0.643357	0.0240032
Scube1:chr15:83656412	Adarb1	0.643357	0.0240032
Bfar:chr16:13702637	Adarb1	0.643357	0.0240032
Mkln1:chr6:31515747	Adarb1	0.643357	0.0240032
Ebna1bp2:chr4:118626126	Adarb1	0.643357	0.0240032
Ubald1:chr16:4875295	Adarb1	-0.643357	0.0240032
Grrp1:chr4:134251508	Adarb1	-0.643357	0.0240032
Cds2:chr2:132309873	Adarb1	0.643357	0.0240032
Dagla:chr19:10245796	Adarb1	0.642526	0.0242452
Tut7:chr13:59819826	Adarb1	-0.640861	0.0247359
Abhd2:chr7:79360606	Adarb1	-0.640861	0.0247359
Bach1:chr16:87731852	Adarb1	-0.64083	0.0247449
Daxx:chr17:33915190	Adarb1	-0.640711	0.0247805
Sntb2:chr8:107017534	Adarb1	-0.640711	0.0247805
Abi1:chr2:23011647	Adarb1	-0.640711	0.0247805
Txnrd3:chr6:89674903	Adarb1	0.639693	0.0250844
Stxbp2:chr8:3640617	Adarb1	0.639693	0.0250844
Efr3a:chr15:65853108	Adarb1	-0.639693	0.0250844
Pelp1:chr11:70393850	Adarb1	0.639693	0.0250844
Ltv1:chr10:13182326	Adarb1	-0.639693	0.0250844
Rel:chr11:23737880	Adarb1	-0.639693	0.0250844
Dpysl2:chr14:66804041	Adarb1	0.639693	0.0250844
Gpaa1:chr15:76332172	Adarb1	0.639693	0.0250844
Slk:chr19:47622332	Adarb1	0.639693	0.0250844
Gpr39:chr1:125872603	Adarb1	0.639693	0.0250844
Nmd3:chr3:69726369	Adarb1	-0.639693	0.0250844
Ptbp3:chr4:59476096	Adarb1	-0.639693	0.0250844
Mob3c:chr4:115835092	Adarb1	-0.639693	0.0250844
Ccdc28b:chr4:129619878	Adarb1	0.639693	0.0250844
Ccdc136:chr6:29425884	Adarb1	0.639693	0.0250844
Tyrobp:chr7:30417409	Adarb1	0.639693	0.0250844
Mrps31:chr8:22429202	Adarb1	0.639693	0.0250844
Ap4b1:chr3:103820903	Adarb1	-0.639693	0.0250844
Akr1c14:chr13:4081008	Adarb1	0.639693	0.0250844
Igsf9b:chr9:27356906	Adarb1	0.639693	0.0250844
Rbm42:chr7:30645136	Adarb1	-0.639693	0.0250844
Tns2:chr15:102107082	Adarb1	-0.639693	0.0250844
Mapkap1:chr2:34563129	Adarb1	-0.639693	0.0250844
Pbxip1:chr3:89446152	Adarb1	-0.639693	0.0250844
Dtx3l:chr16:35928002	Adarb1	-0.639693	0.0250844
Ppp4r2:chr6:100866939	Adarb1	-0.639693	0.0250844
Pym1:chr10:128765870	Adarb1	-0.639693	0.0250844
4931406P16Rik:chr7:34257405	Adarb1	-0.639693	0.0250844
Eif2s3y:chrY:1016383	Adarb1	0.639693	0.0250844
4930481A15Rik:chr19:5417430	Adarb1	0.639693	0.0250844
Syne1:chr10:5097541	Adarb1	0.639693	0.0250844
Agl:chr3:116744688	Adarb1	0.639504	0.025141
Ppp1r7:chr1:93367056	Adarb1	0.639436	0.0251615
Klhl24:chr16:20128812	Adarb1	0.639436	0.0251615
Iws1:chr18:32102877	Adarb1	0.6386	0.0254134
Calcrl:chr2:84332405	Adarb1	-0.6381	0.0255651
Dtx3l:chr16:35926845	Adarb1	-0.636364	0.0260969
Rbbp4:chr4:129309986	Adarb1	-0.636364	0.0260969
Lcp1:chr14:75230502	Adarb1	-0.634496	0.0266776
Rab8b:chr9:66844521	Adarb1	-0.633819	0.0268907
Gabpb2:chr3:95183483	Adarb1	0.633819	0.0268907
Tra2a:chr6:49258630	Adarb1	0.633552	0.0269747
Rab27a:chr9:73097260	Adarb1	0.633234	0.0270754
Frmd5:chr2:121775045	Adarb1	-0.63239	0.0273439
Meg3:chr12:109547644	Adarb1	0.631418	0.0276553
Rab27a:chr9:73096712	Adarb1	-0.631418	0.0276553
Etfbkmt:chr6:149150873	Adarb1	-0.630849	0.0278388
Cp:chr3:19989064	Adarb1	0.629371	0.0283197
Ywhag:chr5:135909342	Adarb1	-0.629371	0.0283197
Mief2:chr11:60732705	Adarb1	0.629108	0.0284058
Serinc3:chr2:163627155	Adarb1	-0.626971	0.0291129
Gls:chr1:52187395	Adarb1	-0.626971	0.0291129
Ebna1bp2:chr4:118626079	Adarb1	0.626971	0.0291129
Ids:chrX:70344636	Adarb1	0.626971	0.0291129
Scai:chr2:39097729	Adarb1	0.624565	0.0299242
Pecam1:chr11:106654633	Adarb1	-0.624565	0.0299242
Stx5a:chr19:8746526	Adarb1	0.624169	0.0300595
Hsdl2:chr4:59618202	Adarb1	-0.624169	0.0300595
Pih1d1:chr7:45156127	Adarb1	0.62384	0.030172
Appl2:chr10:83630297	Adarb1	-0.62384	0.030172
Dtx3l:chr16:35928019	Adarb1	-0.62384	0.030172
Naa35:chr13:59635522	Adarb1	0.623598	0.0302549
Gas8:chr8:123535229	Adarb1	0.623299	0.0303576
Atl3:chr19:7535250	Adarb1	-0.622378	0.0306759
Brinp2:chr1:158320176	Adarb1	0.622222	0.0307297
Pkdcc:chr17:83215570	Adarb1	0.621293	0.0310536
Fam32a:chr8:72223799	Adarb1	0.620835	0.0312139
Pvr:chr7:19904691	Adarb1	-0.619966	0.0315202
Tmem186:chr16:8634568	Adarb1	0.619567	0.0316615
Smo:chr6:29761244	Adarb1	0.619315	0.0317509
Pmpca:chr2:26396549	Adarb1	-0.616463	0.032776
Flt1:chr5:147638272	Adarb1	-0.616347	0.0328184
Mob3a:chr10:80685979	Adarb1	-0.615835	0.0330052
Apopt1:chr12:111734070	Adarb1	0.615835	0.0330052
Zc3h7a:chr16:11143666	Adarb1	-0.615748	0.0330368
Htra1:chr7:130985524	Adarb1	0.615385	0.0331699
Khdrbs1:chr4:129715375	Adarb1	-0.615385	0.0331699
Flt1:chr5:147635853	Adarb1	-0.615385	0.0331699
Shfl:chr9:20870401	Adarb1	0.615385	0.0331699
Ski:chr4:155156488	Adarb1	-0.615385	0.0331699
Slfn5:chr11:82963289	Adarb1	-0.615385	0.0331699
Mapk1ip1l:chr14:47322414	Adarb1	-0.61499	0.033315
Acsl4:chrX:142319263	Adarb1	-0.61499	0.033315
Iws1:chr18:32102875	Adarb1	0.614039	0.033666
Rab6b:chr9:103182126	Adarb1	-0.613876	0.0337264
Tbce:chr13:14001547	Adarb1	0.61378	0.0337619
Sppl2a:chr2:126891488	Adarb1	0.612961	0.0340673
Mier3:chr13:111717718	Adarb1	-0.612961	0.0340673
Sirt4:chr5:115478734	Adarb1	0.612197	0.0343538
Dstyk:chr1:132465026	Adarb1	0.612197	0.0343538
Commd6:chr14:101634220	Adarb1	0.611588	0.0345833
Iqgap1:chr7:80712186	Adarb1	0.609096	0.0355341
Nuak1:chr10:84372191	Adarb1	-0.608637	0.0357109
Ccdc28b:chr4:129620226	Adarb1	0.608392	0.035806
Palm:chr10:79818908	Adarb1	-0.608392	0.035806
Dync1li1:chr9:114724008	Adarb1	-0.60837	0.0358144
Ociad1:chr5:73312433	Adarb1	-0.608244	0.0358633
Palm:chr10:79818937	Adarb1	-0.608244	0.0358633
Cebpg:chr7:35046610	Adarb1	0.607021	0.0363396
Gm26992:chrX:103460467	Adarb1	-0.606611	0.0365003
Abhd2:chr7:79360774	Adarb1	-0.605955	0.0367585
Myo1e:chr9:70383954	Adarb1	-0.605955	0.0367585
Ralgds:chr2:28544179	Adarb1	-0.605811	0.0368157
Gm20721:chr2:174344658	Adarb1	0.604638	0.0372812
Utrn:chr10:12744050	Adarb1	-0.603267	0.0378306
Ccdc84:chr9:44411202	Adarb1	-0.603267	0.0378306
Dtx3l:chr16:35928017	Adarb1	-0.603267	0.0378306
Srpk1:chr17:28592868	Adarb1	0.603198	0.0378582
Gm10687:chr9:44124037	Adarb1	0.602453	0.0381595
Stx1a:chr5:135050173	Adarb1	0.601844	0.0384066
Zswim8:chr14:20721561	Adarb1	0.601844	0.0384066
Pmpca:chr2:26396024	Adarb1	-0.601844	0.0384066
Arf3:chr15:98737994	Adarb1	-0.601844	0.0384066
Ykt6:chr11:5967429	Adarb1	-0.601399	0.0385885
Ptprj:chr2:90548568	Adarb1	0.601399	0.0385885
Agl:chr3:116744097	Adarb1	0.601399	0.0385885
Trim12c:chr7:104339032	Adarb1	0.601399	0.0385885
Grik5:chr7:25010769	Adarb1	0.601399	0.0385885
Tmub2:chr11:102287648	Adarb1	0.601399	0.0385885
Tgoln1:chr6:72608983	Adarb1	-0.601399	0.0385885
Nrxn1:chr17:90916470	Adarb1	0.600905	0.0387904
Son:chr16:91656499	Adarb1	0.600446	0.0389791
Dtx3l:chr16:35928484	Adarb1	-0.600446	0.0389791
Rab4b:chr7:27169962	Adarb1	0.600446	0.0389791
Klf6:chr13:5869473	Adarb1	-0.600004	0.0391614
Ecm2:chr13:49531533	Adarb1	0.59895	0.0395981
Pcdh1:chr18:38186515	Adarb1	-0.59895	0.0395981
Pcmtd1:chr1:7172370	Adarb1	-0.59895	0.0395981
Smg5:chr3:88361659	Adarb1	-0.598606	0.0397413
Zkscan3:chr13:21392480	Adarb1	-0.598606	0.0397413
4930453N24Rik:chr16:64762650	Adarb1	-0.597959	0.0400118
Reep3:chr10:67011326	Adarb1	-0.597173	0.0403425
LTO1:chr7:144920439	Adarb1	0.596841	0.0404825
Kif3c:chr12:3404167	Adarb1	0.596632	0.0405712
Csnk1a1:chr18:61588509	Adarb1	-0.596632	0.0405712
Mcf2l:chr8:13018772	Adarb1	-0.596632	0.0405712
Rictor:chr15:6797182	Adarb1	-0.596632	0.0405712
Gm16201:chr7:139952788	Adarb1	0.596632	0.0405712
Spag9:chr11:94123674	Adarb1	-0.595447	0.0410748
Nol10:chr12:17429853	Adarb1	-0.595447	0.0410748
Kif3c:chr12:3404168	Adarb1	0.594946	0.0412895
Meg3:chr12:109563713	Adarb1	0.594946	0.0412895
Bclaf1:chr10:20340926	Adarb1	-0.594946	0.0412895
Nwd1:chr8:72716227	Adarb1	-0.594946	0.0412895
Pcdh1:chr18:38197088	Adarb1	0.594946	0.0412895
N4bp2l2:chr5:150640768	Adarb1	-0.594593	0.0414408
Iqgap1:chr7:80712390	Adarb1	-0.594406	0.0415215
Rap2c:chrX:51004539	Adarb1	-0.5944	0.0415238
Gpx3:chr11:54909707	Adarb1	0.592648	0.0422829
Tmem69:chr4:116552245	Adarb1	-0.592616	0.042297
Fndc3a:chr14:72539217	Adarb1	-0.591945	0.0425902
Mapk1ip1l:chr14:47320029	Adarb1	-0.591914	0.0426036
Ptpn11:chr5:121131038	Adarb1	-0.591564	0.0427573
Rab5b:chr10:128686882	Adarb1	0.591312	0.042868
Akr1b3:chr6:34310612	Adarb1	-0.591312	0.042868
Supt5:chr7:28320262	Adarb1	-0.591312	0.042868
Snrnp200:chr2:127233601	Adarb1	0.591312	0.042868
Crybg1:chr10:43997300	Adarb1	-0.591312	0.042868
Txndc15:chr13:55726110	Adarb1	-0.591312	0.042868
Ube2e1:chr14:18330987	Adarb1	-0.591312	0.042868
Dhx16:chr17:35881732	Adarb1	0.591312	0.042868
Rad9a:chr19:4195940	Adarb1	0.591312	0.042868
Unc13b:chr4:43240344	Adarb1	0.591312	0.042868
Rfx1:chr8:84095470	Adarb1	0.591312	0.042868
Arap1:chr7:101398719	Adarb1	0.591312	0.042868
Apbb1:chr7:105573747	Adarb1	0.591312	0.042868
Gas8:chr8:123534718	Adarb1	0.591312	0.042868
Fam104a:chr11:113662383	Adarb1	0.591312	0.042868
Itga1:chr13:114996932	Adarb1	-0.591312	0.042868
Foxo4:chrX:101260482	Adarb1	-0.591312	0.042868
Snhg11:chr2:158381489	Adarb1	0.591312	0.042868
Tspyl1:chr10:34283748	Adarb1	0.591312	0.042868
Galnt2l:chr8:123076939	Adarb1	0.591312	0.042868
Qk:chr17:10213732	Adarb1	-0.590841	0.0430759
Zmpste24:chr4:121060312	Adarb1	-0.590785	0.0431005
Fitm2:chr2:163468425	Adarb1	0.590785	0.0431005
Apold1:chr6:134984264	Adarb1	-0.589088	0.0438551
Mterf3:chr13:66930837	Adarb1	0.587453	0.0445911
Col8a2:chr4:126312071	Adarb1	0.587453	0.0445911
Rpa1:chr11:75300584	Adarb1	0.587413	0.0446093
Arcn1:chr9:44742485	Adarb1	-0.587413	0.0446093
Sppl2a:chr2:126891151	Adarb1	-0.587413	0.0446093
Gm37494:chr7:39567644	Adarb1	0.587342	0.0446412
Smpd4:chr16:17637746	Adarb1	0.587282	0.0446686
Spred1:chr2:117179975	Adarb1	-0.587282	0.0446686
Stam:chr2:14148049	Adarb1	0.586125	0.0451949
Hp1bp3:chr4:138226399	Adarb1	0.585976	0.0452632
Efhd2:chr4:141858998	Adarb1	-0.585976	0.0452632
Mydgf:chr17:56176014	Adarb1	-0.58485	0.0457805
Gnb4:chr3:32584072	Adarb1	-0.58485	0.0457805
Myo1h:chr5:114363581	Adarb1	0.58485	0.0457805
Ebna1bp2:chr4:118626125	Adarb1	0.581437	0.0473736
Jade2:chr11:51814158	Adarb1	-0.581437	0.0473736
Smad4:chr18:73639208	Adarb1	-0.581437	0.0473736
Fam32a:chr8:72223528	Adarb1	0.581185	0.047493
Mrpl24:chr3:87921687	Adarb1	0.58042	0.047856
Tmem63b:chr17:45662949	Adarb1	0.58042	0.047856
Abhd2:chr7:79360851	Adarb1	-0.58042	0.047856
Ppp1r15b:chr1:133138010	Adarb1	-0.58042	0.047856
Rbbp4:chr4:129309920	Adarb1	-0.58042	0.047856
Ttc9c:chr19:8810511	Adarb1	-0.579973	0.0480688
Mapk6:chr9:75387202	Adarb1	-0.57831	0.048867
Cap1:chr4:122860322	Adarb1	0.578304	0.0488702
Tor1aip1:chr1:156005064	Adarb1	-0.577934	0.0490488
Mdc1:chr17:35858886	Adarb1	0.577934	0.0490488
Tpd52l2:chr2:181515407	Adarb1	-0.577934	0.0490488
Extl3:chr14:65053907	Adarb1	0.577934	0.0490488
Rnf220:chr4:117271875	Adarb1	0.577934	0.0490488
Rrp1b:chr17:32061757	Adarb1	0.577934	0.0490488
Agl:chr3:116744082	Adarb1	0.577479	0.0492696
B3gat3:chr19:8924652	Adarb1	0.576604	0.049696
Tfrc:chr16:32632730	Adarb1	0.576604	0.049696
Dtx3l:chr16:35926907	Adarb1	-0.574779	0.0505933
Hinfp:chr9:44292778	Adarb1	0.574432	0.0507653
Scarb1:chr5:125283972	Adarb1	-0.574432	0.0507653
Lrrc8b:chr5:105481450	Adarb1	-0.574403	0.0507797
Cpne7:chr8:123131831	Adarb1	0.574143	0.0509085
Ppp1r2:chr16:31252357	Adarb1	-0.574143	0.0509085
Esrra:chr19:6910986	Adarb1	-0.57392	0.0510197
Megf8:chr7:25365816	Adarb1	0.573335	0.0513111
Plpp5:chr8:25723704	Adarb1	0.571933	0.0520151
Mdc1:chr17:35858619	Adarb1	0.571933	0.0520151
Gm11613:chr11:97644524	Adarb1	0.571047	0.0524639
Nrxn3:chr12:90020891	Adarb1	-0.570929	0.0525236
Luzp1:chr4:136546265	Adarb1	0.569983	0.0530057
Plekhh2:chr17:84621768	Adarb1	0.569983	0.0530057
Stxbp2:chr8:3640667	Adarb1	0.56981	0.0530941
Flt4:chr11:49634246	Adarb1	0.56981	0.0530941
Klc1:chr12:111794187	Adarb1	0.56981	0.0530941
Parvb:chr15:84271243	Adarb1	-0.56981	0.0530941
Ptdss2:chr7:141131471	Adarb1	-0.56981	0.0530941
Adgrl2:chr3:148858812	Adarb1	0.56981	0.0530941
Fam219a:chr4:41534878	Adarb1	-0.56981	0.0530941
Mrpl3:chr9:105071393	Adarb1	0.56981	0.0530941
Malt1:chr18:65478403	Adarb1	-0.56981	0.0530941
Nek9:chr12:85299584	Adarb1	0.56981	0.0530941
Cyp7b1:chr3:18103779	Adarb1	-0.56981	0.0530941
Etfrf1:chr6:145216863	Adarb1	0.56981	0.0530941
Cables1:chr18:11944779	Adarb1	0.56981	0.0530941
Trim16:chr11:62841972	Adarb1	-0.56981	0.0530941
Dtx3l:chr16:35928090	Adarb1	-0.56981	0.0530941
Rlim:chrX:103960550	Adarb1	-0.56981	0.0530941
Ass1:chr2:31476937	Adarb1	0.56981	0.0530941
Gm21973:chr15:10334239	Adarb1	-0.56981	0.0530941
Nr3c1:chr18:39410975	Adarb1	-0.569485	0.0532606
H3f3b:chr11:116024259	Adarb1	0.569254	0.0533794
Utrn:chr10:12738202	Adarb1	0.569095	0.0534611
Hus1:chr11:8993959	Adarb1	-0.569095	0.0534611
Klc1:chr12:111790916	Adarb1	0.569095	0.0534611
Smad2:chr18:76305107	Adarb1	-0.569095	0.0534611
Atp13a2:chr4:141002917	Adarb1	0.569095	0.0534611
Rhoa:chr9:108337339	Adarb1	-0.567426	0.054324
Fam50a:chrX:74315566	Adarb1	0.567314	0.0543824
Ski:chr4:155155172	Adarb1	0.567314	0.0543824
Slc39a10:chr1:46808220	Adarb1	-0.566954	0.0545702
Socs7:chr11:97397786	Adarb1	-0.566954	0.0545702
Magt1:chrX:105970066	Adarb1	0.566655	0.0547263
Hip1:chr5:135407751	Adarb1	-0.566434	0.0548421
Ankrd28:chr14:31701451	Adarb1	-0.566434	0.0548421
Adsl:chr15:80968839	Adarb1	0.565926	0.0551084
Eng:chr2:32674837	Adarb1	0.565822	0.0551627
Gnl3l:chrX:150985656	Adarb1	-0.563924	0.0561672
Mdc1:chr17:35858957	Adarb1	0.563924	0.0561672
Tor1b:chr2:30956862	Adarb1	-0.563924	0.0561672
Cacng8:chr7:3415139	Adarb1	0.562367	0.0570005
Plxnd1:chr6:115960563	Adarb1	-0.561662	0.0573803
2610002M06Rik:chrX:107784363	Adarb1	-0.561662	0.0573803
Rel:chr11:23737221	Adarb1	-0.561456	0.0574918
Gna11:chr10:81530060	Adarb1	0.561456	0.0574918
Dtx3l:chr16:35928065	Adarb1	-0.561456	0.0574918
Gm16201:chr7:139952766	Adarb1	0.561456	0.0574918
Nrxn3:chr12:90020083	Adarb1	-0.561407	0.0575182
Sirt4:chr5:115478850	Adarb1	0.560968	0.0577561
Itih5:chr2:10251430	Adarb1	-0.560421	0.0580535
Ruvbl2:chr7:45424783	Adarb1	0.559916	0.0583293
Srsf10:chr4:135864698	Adarb1	-0.559916	0.0583293
Orai1:chr5:123015462	Adarb1	0.559916	0.0583293
Prpf6:chr2:181654471	Adarb1	0.55985	0.0583655
Ccnd2:chr6:127125380	Adarb1	0.559441	0.0585895
9930104L06Rik:chr4:124943285	Adarb1	0.559441	0.0585895
Peak1:chr9:56223652	Adarb1	-0.559441	0.0585895
Bmpr2:chr1:59874872	Adarb1	0.559441	0.0585895
Cilk1:chr9:78160426	Adarb1	0.558773	0.0589564
Meg3:chr12:109563754	Adarb1	0.558338	0.0591964
Hadh:chr3:131233769	Adarb1	0.558338	0.0591964
Coro2b:chr9:62422774	Adarb1	-0.558338	0.0591964
Gm29609:chr5:31173480	Adarb1	0.556919	0.0599836
Nol10:chr12:17429608	Adarb1	-0.556919	0.0599836
Mark1:chr1:184901633	Adarb1	0.556352	0.0603
Tmem69:chr4:116552791	Adarb1	-0.556257	0.0603533
Pnisr:chr4:21873320	Adarb1	0.556117	0.0604313
Gtf3c3:chr1:54397361	Adarb1	-0.554865	0.0611355
Rhpn2:chr7:35391581	Adarb1	0.553658	0.0618201
Gabpb2:chr3:95184283	Adarb1	0.553658	0.0618201
Appbp2:chr11:85189023	Adarb1	-0.553341	0.0620005
Ptprg:chr14:12240385	Adarb1	-0.552448	0.0625115
Cds2:chr2:132310837	Adarb1	-0.552448	0.0625115
Eapp:chr12:54671903	Adarb1	0.551689	0.0629477
Rab2b:chr14:52263406	Adarb1	0.550737	0.0634979
Malt1:chr18:65478482	Adarb1	0.549309	0.0643293
Ythdf3:chr3:16216089	Adarb1	-0.549309	0.0643293
Vcl:chr14:21024253	Adarb1	-0.549181	0.0644046
Meg3:chr12:109562933	Adarb1	0.546411	0.0660406
Vamp4:chr1:162598198	Adarb1	0.546411	0.0660406
Zkscan17:chr11:59506388	Adarb1	0.54586	0.0663693
Parg:chr14:32296625	Adarb1	-0.545455	0.0666119
Tra2a:chr6:49259846	Adarb1	-0.545455	0.0666119
Nrxn1:chr17:90858613	Adarb1	-0.545455	0.0666119
Isg20l2:chr3:87940164	Adarb1	-0.545455	0.0666119
Eapp:chr12:54672286	Adarb1	0.545455	0.0666119
Mettl3:chr14:52295239	Adarb1	0.54486	0.0669686
Fitm2:chr2:163468444	Adarb1	-0.5442	0.0673665
Lrrc32:chr7:98501026	Adarb1	-0.543863	0.0675704
Fmnl2:chr2:53132394	Adarb1	-0.543835	0.0675871
2900026A02Rik:chr5:113086758	Adarb1	0.543835	0.0675871
Tra2a:chr6:49254769	Adarb1	0.542908	0.0681501
Wasf2:chr4:133196096	Adarb1	0.542908	0.0681501
Bbs1:chr19:4888591	Adarb1	0.541558	0.0689754
Dennd6a:chr14:26631476	Adarb1	0.541558	0.0689754
Psma5:chr3:108279268	Adarb1	0.541228	0.0691781
Nlgn3:chrX:101325809	Adarb1	0.54086	0.069405
Rell1:chr5:63909781	Adarb1	-0.54086	0.069405
Dnajb12:chr10:59897976	Adarb1	-0.540354	0.0697171
Snrnp48:chr13:38220609	Adarb1	0.539704	0.0701203
Eapp:chr12:54672253	Adarb1	-0.539405	0.0703056
Rpl7l1:chr17:46774922	Adarb1	0.539405	0.0703056
Fam20b:chr1:156680065	Adarb1	0.538613	0.0707997
Rpa1:chr11:75301000	Adarb1	0.538462	0.0708943
Colec12:chr18:9882421	Adarb1	0.538462	0.0708943
Ovca2:chr11:75176345	Adarb1	-0.538462	0.0708943
Htr2c:chrX:147169698	Adarb1	-0.538462	0.0708943
Mdc1:chr17:35858897	Adarb1	0.538462	0.0708943
Cdkn1b:chr6:134925137	Adarb1	0.538062	0.0711447
Rassf1:chr9:107561159	Adarb1	-0.538062	0.0711447
Ensa:chr3:95630970	Adarb1	0.538062	0.0711447
Rasal2:chr1:157138062	Adarb1	0.538062	0.0711447
Zyg11b:chr4:108230862	Adarb1	0.537596	0.0714374
Nrxn1:chr17:90858670	Adarb1	-0.537456	0.0715255
Sdc4:chr2:164424643	Adarb1	-0.537452	0.071528
Trmt1l:chr1:151443667	Adarb1	0.536176	0.072334
Hipk1:chr3:103740623	Adarb1	-0.535903	0.0725075
Son:chr16:91665213	Adarb1	-0.535225	0.0729392
Midn:chr10:80157528	Adarb1	-0.534862	0.0731706
Prxl2c:chr13:64290302	Adarb1	0.533963	0.0737469
Srgap1:chr10:121782564	Adarb1	-0.532539	0.0746663
Lamp2:chrX:38405277	Adarb1	0.5324	0.0747563
Arrb1:chr7:99602401	Adarb1	-0.5324	0.0747563
Irak1:chrX:74015014	Adarb1	0.532379	0.07477
Uggt1:chr1:36151718	Adarb1	0.532379	0.07477
Col18a1:chr10:77096495	Adarb1	0.532181	0.0748984
Crot:chr5:8996470	Adarb1	-0.532181	0.0748984
Dmap1:chr4:117676387	Adarb1	0.532181	0.0748984
Evi5:chr5:107795748	Adarb1	-0.532181	0.0748984
Rab5a:chr17:53479352	Adarb1	-0.532181	0.0748984
Vezf1:chr11:88081463	Adarb1	0.532181	0.0748984
Vta1:chr10:14668054	Adarb1	0.532181	0.0748984
Arhgap31:chr16:38602900	Adarb1	0.532181	0.0748984
Fkbp5:chr17:28441007	Adarb1	0.532181	0.0748984
Col3a1:chr1:45347285	Adarb1	0.532181	0.0748984
Traf6:chr2:101697842	Adarb1	-0.532181	0.0748984
Zbtb41:chr1:139452771	Adarb1	-0.532181	0.0748984
Heatr5a:chr12:51888933	Adarb1	0.532181	0.0748984
Limch1:chr5:67033134	Adarb1	0.532181	0.0748984
Ebf1:chr11:44996062	Adarb1	-0.532181	0.0748984
Ccdc82:chr9:13291255	Adarb1	0.532181	0.0748984
Galnt2l:chr8:122496518	Adarb1	-0.532181	0.0748984
Gm28035:chr2:30272046	Adarb1	0.532181	0.0748984
Gm37988:chr1:4867522	Adarb1	0.532181	0.0748984
Pcp4l1:chr1:171173815	Adarb1	0.531469	0.0753623
Gabpb2:chr3:95183940	Adarb1	0.531469	0.0753623
Trim12c:chr7:104339230	Adarb1	0.531469	0.0753623
Hdhd5:chr6:120509764	Adarb1	0.531469	0.0753623
Prpf6:chr2:181654484	Adarb1	0.53142	0.0753938
Tubb6:chr18:67402417	Adarb1	-0.530264	0.0761511
Aida:chr1:183324375	Adarb1	-0.529991	0.0763305
Bcl2l11:chr2:128160351	Adarb1	-0.529691	0.076528
Mafk:chr5:139801260	Adarb1	-0.529333	0.0767643
Meg3:chr12:109563743	Adarb1	0.529333	0.0767643
Tmem80:chr7:141336698	Adarb1	0.529333	0.0767643
Mast4:chr13:102734617	Adarb1	-0.529333	0.0767643
Nrep:chr18:33437483	Adarb1	0.529333	0.0767643
Gnb4:chr3:32582400	Adarb1	-0.529121	0.0769044
Rab14:chr2:35180731	Adarb1	-0.528897	0.0770524
Cfap300:chr9:8021804	Adarb1	-0.528897	0.0770524
N4bp2l2:chr5:150638267	Adarb1	0.528897	0.0770524
5031425E22Rik:chr5:23425894	Adarb1	0.528897	0.0770524
Spag9:chr11:94123712	Adarb1	-0.528182	0.0775272
Gnl3l:chrX:150985477	Adarb1	0.526774	0.0784678
Lypla2:chr4:135968506	Adarb1	0.526774	0.0784678
N4bp2l2:chr5:150638268	Adarb1	0.526531	0.0786305
Ppp3r1:chr11:17199744	Adarb1	-0.526259	0.0788138
Pvr:chr7:19904692	Adarb1	-0.526259	0.0788138
Cbfa2t2:chr2:154537909	Adarb1	0.525594	0.0792619
Bclaf1:chr10:20340927	Adarb1	-0.524476	0.0800194
E2f4:chr8:105303447	Adarb1	0.524218	0.0801946
Nrxn3:chr12:90020920	Adarb1	-0.524165	0.0802306
Grb10:chr11:11932137	Adarb1	0.5232	0.0808894
Canx:chr11:50295141	Adarb1	-0.52281	0.0811566
Lrrc58:chr16:37886136	Adarb1	0.522526	0.0813516
Celf2:chr2:6541614	Adarb1	0.522466	0.0813932
Zfp651:chr9:121768584	Adarb1	-0.522466	0.0813932
Fstl1:chr16:37835764	Adarb1	-0.522466	0.0813932
Kpna4:chr3:69073109	Adarb1	-0.522466	0.0813932
Dennd1a:chr2:37805551	Adarb1	0.522466	0.0813932
Paip2:chr18:35608761	Adarb1	0.522466	0.0813932
Blcap:chr2:157560831	Adarb1	0.522466	0.0813932
Arid5b:chr10:68096017	Adarb1	-0.522082	0.0816574
Spaar:chr4:43731757	Adarb1	0.522082	0.0816574
Mapk1:chr16:17044628	Adarb1	-0.522082	0.0816574
Gnl3l:chrX:150983814	Adarb1	-0.521892	0.0817882
Tbce:chr13:14001518	Adarb1	0.521892	0.0817882
Bfar:chr16:13702636	Adarb1	0.521892	0.0817882
Epn2:chr11:61521808	Adarb1	0.52143	0.0821075
Lman2l:chr1:36443549	Adarb1	0.52143	0.0821075
Gstt1:chr10:75786946	Adarb1	-0.52143	0.0821075
Tchp:chr5:114720202	Adarb1	0.52143	0.0821075
Hipk1:chr3:103746803	Adarb1	0.52143	0.0821075
Ankrd28:chr14:31700968	Adarb1	-0.52143	0.0821075
Prpf3:chr3:95845170	Adarb1	0.52143	0.0821075
Mtif3:chr5:146954067	Adarb1	0.52143	0.0821075
Drosha:chr15:12889708	Adarb1	0.52143	0.0821075
Map4k3:chr17:80624098	Adarb1	0.52143	0.0821075
Diaph1:chr18:37853380	Adarb1	0.52143	0.0821075
Slc1a1:chr19:28913338	Adarb1	-0.52143	0.0821075
Arih1:chr9:59403392	Adarb1	0.52143	0.0821075
Clk1:chr1:58416398	Adarb1	0.52143	0.0821075
Plxdc2:chr2:16548229	Adarb1	0.52143	0.0821075
Ccdc39:chr3:33819910	Adarb1	0.52143	0.0821075
Tln1:chr4:43544648	Adarb1	-0.52143	0.0821075
Itpr1:chr6:108401373	Adarb1	0.52143	0.0821075
Serbp1:chr6:67285584	Adarb1	-0.52143	0.0821075
Tbc1d9b:chr11:50149899	Adarb1	0.52143	0.0821075
Azi2:chr9:118062622	Adarb1	-0.52143	0.0821075
Rapgef1:chr2:29702289	Adarb1	0.52143	0.0821075
Elavl1:chr8:4289068	Adarb1	-0.52143	0.0821075
Kcnt1:chr2:25901867	Adarb1	0.52143	0.0821075
Syt11:chr3:88746628	Adarb1	0.52143	0.0821075
Adgrf5:chr17:43455358	Adarb1	0.52114	0.0823085
Thap2:chr10:115369389	Adarb1	-0.52114	0.0823085
Marchf5:chr19:37219536	Adarb1	-0.52114	0.0823085
Rap2c:chrX:51004898	Adarb1	-0.52114	0.0823085
Tra2a:chr6:49258830	Adarb1	0.520416	0.0828105
Hmgcl:chr4:135957129	Adarb1	0.519831	0.0832189
Ikbip:chr10:91098466	Adarb1	0.519655	0.0833413
Nudt21:chr8:94017272	Adarb1	-0.519434	0.0834962
Dtx3l:chr16:35928046	Adarb1	-0.518539	0.0841239
5031425E22Rik:chr5:23422729	Adarb1	0.51839	0.0842288
Steap1:chr5:5742860	Adarb1	0.5182	0.0843621
Tbc1d15:chr10:115217643	Adarb1	0.5182	0.0843621
Gne:chr4:44040419	Adarb1	0.5182	0.0843621
Daw1:chr1:83209349	Adarb1	-0.5182	0.0843621
Meg3:chr12:109559014	Adarb1	0.517483	0.0848688
Flnb:chr14:7936060	Adarb1	-0.517483	0.0848688
Rhpn2:chr7:35391298	Adarb1	0.517483	0.0848688
Tmem69:chr4:116552787	Adarb1	-0.517483	0.0848688
Dagla:chr19:10245733	Adarb1	0.517483	0.0848688
Ggnbp2:chr11:84855603	Adarb1	0.517033	0.0851868
Zfp267:chr3:36169706	Adarb1	0.516091	0.0858572
Ptp4a2:chr4:129848670	Adarb1	-0.515897	0.0859954
Smad5:chr13:56741661	Adarb1	0.515062	0.086593
Itprid2:chr2:79672286	Adarb1	0.515062	0.086593
Tbce:chr13:14001522	Adarb1	0.515011	0.0866291
Abcc9:chr6:142589987	Adarb1	-0.515011	0.0866291
Pakap:chr4:57895139	Adarb1	-0.514887	0.0867183
Dact3:chr7:16885789	Adarb1	0.514887	0.0867183
Flna:chrX:74226869	Adarb1	0.514887	0.0867183
Dagla:chr19:10245790	Adarb1	0.514887	0.0867183
Ralb:chr1:119470659	Adarb1	-0.514887	0.0867183
Kif5a:chr10:127227674	Adarb1	0.514887	0.0867183
Npdc1:chr2:25406980	Adarb1	0.514831	0.0867586
Tedc2:chr17:24215455	Adarb1	0.514668	0.0868757
Icam1:chr9:21020583	Adarb1	-0.514668	0.0868757
Gabpb2:chr3:95182583	Adarb1	0.514668	0.0868757
Mlh3:chr12:85234649	Adarb1	0.514097	0.0872864
Polr3gl:chr3:96578149	Adarb1	0.514097	0.0872864
Mier3:chr13:111717990	Adarb1	-0.514021	0.0873413
Ipo7:chr7:110052796	Adarb1	0.514021	0.0873413
Pank3:chr11:35789318	Adarb1	-0.512537	0.0884164
Stam:chr2:14148057	Adarb1	-0.512351	0.0885516
Usp31:chr7:121642679	Adarb1	-0.512169	0.0886842
Gabpb2:chr3:95183902	Adarb1	0.511484	0.0891844
Slc6a6:chr6:91758759	Adarb1	-0.511384	0.0892572
Zfp626:chr7:27821531	Adarb1	0.511384	0.0892572
Flii:chr11:60721702	Adarb1	-0.510679	0.0897745
Lama5:chr2:180187683	Adarb1	-0.510679	0.0897745
Cntnap1:chr11:101184738	Adarb1	0.510679	0.0897745
Tbc1d15:chr10:115210245	Adarb1	0.510679	0.0897745
Sgpp1:chr12:75722681	Adarb1	0.510679	0.0897745
Kif2a:chr13:106974514	Adarb1	0.510679	0.0897745
Dpysl2:chr14:66804043	Adarb1	0.510679	0.0897745
Med4:chr14:73511190	Adarb1	-0.510679	0.0897745
Psd2:chr18:36010688	Adarb1	0.510679	0.0897745
Mrpl11:chr19:4963401	Adarb1	-0.510679	0.0897745
Ppp6r3:chr19:3455005	Adarb1	-0.510679	0.0897745
Rfx1:chr8:84093065	Adarb1	0.510679	0.0897745
Tbc1d9:chr8:83259323	Adarb1	-0.510679	0.0897745
Phip:chr9:82869573	Adarb1	-0.510679	0.0897745
Rbm43:chr2:51925063	Adarb1	-0.510679	0.0897745
Hectd4:chr5:121366499	Adarb1	0.510679	0.0897745
Trim39:chr17:36263803	Adarb1	0.510679	0.0897745
2310022A10Rik:chr7:27581789	Adarb1	0.510679	0.0897745
Cfap44:chr16:44478937	Adarb1	-0.510679	0.0897745
2310010J17Rik:chr7:90124999	Adarb1	-0.510679	0.0897745
Itm2a:chrX:107397562	Adarb1	-0.51049	0.0899137
Slc6a20a:chr9:123642090	Adarb1	-0.51049	0.0899137
Ecm2:chr13:49532098	Adarb1	-0.51049	0.0899137
Xpnpep3:chr15:81456903	Adarb1	-0.509902	0.0903466
Urb2:chr8:124047800	Adarb1	-0.507956	0.0917902
Lsm12:chr11:102163662	Adarb1	0.507597	0.0920584
Heatr3:chr8:88171864	Adarb1	-0.507597	0.0920584
Atp10a:chr7:58663783	Adarb1	-0.50758	0.0920714
Vhl:chr6:113630105	Adarb1	0.50758	0.0920714
Wapl:chr14:34747160	Adarb1	-0.507576	0.092074
Icosl:chr10:78078846	Adarb1	0.50687	0.0926029
Stx1a:chr5:135050458	Adarb1	0.50687	0.0926029
Itpripl2:chr7:118485252	Adarb1	-0.50687	0.0926029
Dnajc1:chr2:18214653	Adarb1	0.505418	0.0936965
Smpd4:chr16:17637745	Adarb1	0.504842	0.0941328
Ankrd28:chr14:31700663	Adarb1	-0.504379	0.0944845
Sh2d5:chr4:138260127	Adarb1	0.504379	0.0944845
Ccnd2:chr6:127128281	Adarb1	-0.504068	0.0947215
Srpk1:chr17:28592856	Adarb1	0.503497	0.0951574
Snhg11:chr2:158383957	Adarb1	0.503497	0.0951574
Prkn:chr17:11525147	Adarb1	0.503497	0.0951574
Mindy2:chr9:70601462	Adarb1	0.503416	0.0952192
Gm10687:chr9:44123720	Adarb1	-0.501766	0.0964857
Zkscan3:chr13:21390009	Adarb1	0.501272	0.0968678
Arid4a:chr12:71098211	Adarb1	-0.500876	0.0971738
Sntb2:chr8:107017780	Adarb1	-0.500876	0.0971738
Pcdh9:chr14:93201661	Adarb1	0.500876	0.0971738
Tmem130:chr5:144736295	Adarb1	0.500496	0.0974693
Apod:chr16:31296708	Adarb1	-0.500329	0.097599
Mib1:chr18:10813843	Adarb1	0.50016	0.0977299
Pcdh9:chr14:93201709	Adarb1	0.500132	0.0977516
Kif3c:chr12:3404248	Adarb1	0.500012	0.097845
Zkscan3:chr13:21392375	Adarb1	0.500012	0.097845
Zbtb7b:chr3:89379223	Adarb1	0.500012	0.097845
Icam1:chr9:21020522	Adarb1	-0.500012	0.097845
Trappc10:chr10:78187692	Adarb1	-0.499928	0.0979109
Nob1:chr8:107416155	Adarb1	0.499928	0.0979109
Ddx19a:chr8:110975732	Adarb1	-0.499928	0.0979109
P4ha2:chr11:54120104	Adarb1	0.499928	0.0979109
Rmnd1:chr10:4403327	Adarb1	-0.499928	0.0979109
Prpf8:chr11:75499869	Adarb1	0.499928	0.0979109
Per1:chr11:69101076	Adarb1	0.499928	0.0979109
Zbtb20:chr16:43641151	Adarb1	-0.499928	0.0979109
Mrps23:chr11:88210693	Adarb1	-0.499928	0.0979109
Cpt1a:chr19:3370829	Adarb1	0.499928	0.0979109
Prdx3:chr19:60873219	Adarb1	0.499928	0.0979109
Cox7b:chrX:106019021	Adarb1	0.499928	0.0979109
Adam9:chr8:24950902	Adarb1	0.499928	0.0979109
Uba7:chr9:107977210	Adarb1	0.499928	0.0979109
Tdrd7:chr4:46029771	Adarb1	0.499928	0.0979109
Gmds:chr13:32127990	Adarb1	0.499928	0.0979109
Ak7:chr12:105768546	Adarb1	0.499928	0.0979109
Stx3:chr19:11777711	Adarb1	0.499928	0.0979109
Alkbh5:chr11:60553845	Adarb1	-0.499928	0.0979109
Gpr146:chr5:139394168	Adarb1	0.499928	0.0979109
Taf1b:chr12:24558244	Adarb1	0.499928	0.0979109
Qk:chr17:10319303	Adarb1	-0.499928	0.0979109
Prps1l3:chr12:57239452	Adarb1	-0.499928	0.0979109
Slc7a2:chr8:40920556	Adarb1	-0.499128	0.098535
Btg3:chr16:78360165	Adarb1	-0.499072	0.0985791
4930453N24Rik:chr16:64762345	Adarb1	-0.499072	0.0985791
Clk2:chr3:89168205	Adarb1	-0.499072	0.0985791
Ttyh3:chr5:140622619	Adarb1	-0.4983	0.0991847
Trim12c:chr7:104339062	Adarb1	0.4983	0.0991847
Wwox:chr8:114733528	Adarb1	0.498249	0.0992247
Mgat4a:chr1:37443155	Adarb1	-0.497639	0.0997044
Nrxn1:chr17:90859021	Adarb1	0.497374	0.0999139
Ro60:chr1:143755371	Adarb1	0.497374	0.0999139
Fastk:chr5:24444824	Adarb1	-0.496503	0.100603
Gm49320:chr8:4247385	Adarb1	0.496503	0.100603
Rbbp4:chr4:129309892	Adarb1	-0.4964	0.100685
Sf3a1:chr11:4180936	Adarb1	-0.496253	0.100802
Slc12a5:chr2:164998957	Adarb1	0.495663	0.101271
Ntan1:chr16:13834019	Adarb1	-0.495663	0.101271
Inpp1:chr1:52789194	Adarb1	-0.495663	0.101271
Iqcg:chr16:33015605	Adarb1	0.495663	0.101271
Ywhag:chr5:135910350	Adarb1	-0.495095	0.101724
Gm29650:chrY:1048598	Adarb1	0.495095	0.101724
Coro2b:chr9:62424117	Adarb1	-0.493652	0.102882
Stat3:chr11:100888377	Adarb1	-0.493077	0.103345
Ankrd28:chr14:31701362	Adarb1	-0.493077	0.103345
Ankrd28:chr14:31701475	Adarb1	-0.493077	0.103345
Ddx39b:chr17:35251808	Adarb1	0.493077	0.103345
Zfp609:chr9:65692632	Adarb1	-0.493077	0.103345
Gm37494:chr7:39567651	Adarb1	0.493077	0.103345
Coro2b:chr9:62422890	Adarb1	-0.49297	0.103432
Zbtb6:chr2:37425899	Adarb1	-0.49297	0.103432
Eps15l1:chr8:72376760	Adarb1	0.492668	0.103676
Cox7b:chrX:106019042	Adarb1	0.492668	0.103676
Hexa:chr9:59545600	Adarb1	0.492073	0.104158
Ythdf3:chr3:16215609	Adarb1	-0.491274	0.104808
Klhl24:chr16:20124383	Adarb1	-0.491274	0.104808
Zbtb4:chr11:69781425	Adarb1	0.491181	0.104884
Ttyh3:chr5:140622229	Adarb1	0.490934	0.105085
Son:chr16:91656086	Adarb1	0.490369	0.105548
Zyg11b:chr4:108230620	Adarb1	-0.490369	0.105548
Slc35e2:chr4:155621903	Adarb1	0.48951	0.106252
Klhl24:chr16:20123748	Adarb1	0.48951	0.106252
Phc2:chr4:128751948	Adarb1	-0.48951	0.106252
Tent5c:chr3:100468477	Adarb1	-0.48951	0.106252
Nop53:chr7:15946004	Adarb1	0.488935	0.106726
Nucks1:chr1:131932389	Adarb1	0.487983	0.107514
Rbbp4:chr4:129309997	Adarb1	0.487722	0.10773
Mob3a:chr10:80685750	Adarb1	-0.487722	0.10773
Pwwp2a:chr11:43706402	Adarb1	-0.48766	0.107782
Gnb1:chr4:155559265	Adarb1	-0.487622	0.107814
Slc35e1:chr8:72482674	Adarb1	-0.486866	0.108443
Ovca2:chr11:75177363	Adarb1	-0.486866	0.108443
Ptprj:chr2:90548339	Adarb1	0.486791	0.108505
Hinfp:chr9:44292624	Adarb1	0.486791	0.108505
Usb1:chr8:95346963	Adarb1	-0.486774	0.10852
Vcam1:chr3:116117799	Adarb1	-0.486484	0.108761
Becn1:chr11:101294548	Adarb1	0.486484	0.108761
Ebna1bp2:chr4:118626143	Adarb1	0.485928	0.109227
Fam32a:chr8:72223872	Adarb1	0.485928	0.109227
Ccnd2:chr6:127125362	Adarb1	-0.485826	0.109312
Stard8:chrX:99074517	Adarb1	0.485826	0.109312
Snhg11:chr2:158383547	Adarb1	-0.485826	0.109312
Rpl22:chr4:152332980	Adarb1	0.484214	0.11067
Eif2s3y:chrY:1016395	Adarb1	0.484062	0.110797
Kank3:chr17:33821048	Adarb1	0.483476	0.111294
Dtx3l:chr16:35928050	Adarb1	-0.483476	0.111294
Scarb1:chr5:125278776	Adarb1	0.482613	0.112028
Ptprb:chr10:116389119	Adarb1	-0.482517	0.112109
Snapc1l:chr12:73946423	Adarb1	-0.482517	0.112109
Atxn1:chr13:45680218	Adarb1	-0.481553	0.112933
Rragc:chr4:123936763	Adarb1	0.481471	0.113004
Smad3:chr9:63647387	Adarb1	-0.481471	0.113004
Tra2a:chr6:49260965	Adarb1	0.481376	0.113085
Snrnp70:chr7:45383549	Adarb1	0.481376	0.113085
Gm5526:chr1:45857424	Adarb1	-0.480503	0.113835
Rpa1:chr11:75300546	Adarb1	0.480503	0.113835
Ddx39b:chr17:35252517	Adarb1	0.480503	0.113835
Tbl1xr1:chr3:22214301	Adarb1	-0.480503	0.113835
Gfod1:chr13:43196380	Adarb1	-0.480503	0.113835
Ftl1-ps1:chr13:74407107	Adarb1	-0.480384	0.113937
Ccnl2:chr4:155822800	Adarb1	0.480384	0.113937
Ehd1:chr19:6299418	Adarb1	-0.479861	0.114389
Vasp:chr7:19257206	Adarb1	0.479861	0.114389
Rbm6:chr9:107780369	Adarb1	0.479861	0.114389
Plec:chr15:76174895	Adarb1	0.478693	0.115401
Itih5:chr2:10252266	Adarb1	0.478575	0.115503
Bbs2:chr8:94079734	Adarb1	0.478575	0.115503
Nol10:chr12:17429614	Adarb1	0.478575	0.115503
Irak2:chr6:113694869	Adarb1	-0.478453	0.11561
Fam220a:chr5:143551478	Adarb1	-0.478453	0.11561
Penk:chr4:4134209	Adarb1	-0.477738	0.116233
Cops3:chr11:59818726	Adarb1	0.477305	0.116611
Ube2e1:chr14:18283193	Adarb1	-0.477305	0.116611
Abcc5:chr16:20402365	Adarb1	0.477305	0.116611
Gnl3l:chrX:150985439	Adarb1	0.477305	0.116611
Trp53inp1:chr4:11171014	Adarb1	-0.477305	0.116611
Tnfrsf1b:chr4:145213580	Adarb1	-0.477305	0.116611
Cyfip1:chr7:55895114	Adarb1	0.477305	0.116611
Sh2d5:chr4:138260031	Adarb1	0.477305	0.116611
Rab2a:chr4:8597220	Adarb1	-0.477305	0.116611
Cdr2l:chr11:115395412	Adarb1	0.477305	0.116611
Ints5:chr19:8895569	Adarb1	0.477305	0.116611
Srpk1:chr17:28592842	Adarb1	0.477196	0.116707
Rnf11:chr4:109453267	Adarb1	0.476944	0.116928
Ovca2:chr11:75177351	Adarb1	-0.476358	0.117442
Ptprj:chr2:90548370	Adarb1	0.475524	0.118176
Dync1li2:chr8:104418099	Adarb1	0.475524	0.118176
Tasor:chr14:27483446	Adarb1	0.475524	0.118176
Rab8b:chr9:66844910	Adarb1	-0.475524	0.118176
Mpeg1:chr19:12464262	Adarb1	0.475524	0.118176
Shank3:chr15:89547935	Adarb1	-0.474292	0.119267
Trp53inp1:chr4:11171319	Adarb1	-0.474292	0.119267
Ttc9c:chr19:8811101	Adarb1	-0.474292	0.119267
St3gal1:chr15:67103755	Adarb1	-0.474006	0.119521
Mgll:chr6:88827768	Adarb1	0.474006	0.119521
4930453N24Rik:chr16:64762672	Adarb1	-0.474006	0.119521
Tbce:chr13:14001548	Adarb1	0.473687	0.119805
Khdrbs1:chr4:129715084	Adarb1	-0.473385	0.120075
Tom1l2:chr11:60240126	Adarb1	-0.47305	0.120373
Akt2:chr7:27636151	Adarb1	-0.47305	0.120373
Odr4:chr1:150361791	Adarb1	-0.47305	0.120373
Pum2:chr12:8749774	Adarb1	-0.47305	0.120373
Cpd:chr11:76781881	Adarb1	-0.47305	0.120373
Ap4s1:chr12:51720663	Adarb1	-0.47305	0.120373
Smarcd1:chr15:99712942	Adarb1	0.47305	0.120373
Ppp6r3:chr19:3487026	Adarb1	-0.47305	0.120373
E2f5:chr3:14578989	Adarb1	-0.47305	0.120373
4933434E20Rik:chr3:90058768	Adarb1	0.47305	0.120373
Hadh:chr3:131248501	Adarb1	0.47305	0.120373
Gucy1b1:chr3:82034321	Adarb1	-0.47305	0.120373
Vps36:chr8:22211544	Adarb1	0.47305	0.120373
Rab3a:chr8:70756497	Adarb1	0.47305	0.120373
Pcsk7:chr9:45909678	Adarb1	0.47305	0.120373
Rusc2:chr4:43426998	Adarb1	-0.47305	0.120373
Rps27l:chr9:66949509	Adarb1	0.47305	0.120373
1110051M20Rik:chr2:91340878	Adarb1	-0.47305	0.120373
Tspyl2:chrX:152342373	Adarb1	0.47305	0.120373
Slc39a9:chr12:80682869	Adarb1	0.47305	0.120373
Ttr:chr18:20672474	Adarb1	0.47305	0.120373
Fnbp1:chr2:31032736	Adarb1	-0.47305	0.120373
Taok1:chr11:77534417	Adarb1	0.472855	0.120547
Gabarapl2:chr8:111953302	Adarb1	0.472855	0.120547
Gnl3l:chrX:150984552	Adarb1	-0.471843	0.121455
Kif3c:chr12:3404647	Adarb1	0.471843	0.121455
Wwtr1:chr3:57462583	Adarb1	-0.471324	0.121922
Uros:chr7:133686578	Adarb1	0.471324	0.121922
Ppil6:chr10:41512953	Adarb1	0.471324	0.121922
Mfap1a:chr2:121492881	Adarb1	0.4713	0.121944
Sez6l2:chr7:126965256	Adarb1	0.470274	0.122871
Nf2:chr11:4767021	Adarb1	0.470132	0.122999
Gm29650:chrY:1048606	Adarb1	0.470132	0.122999
Gm35572:chr8:71753872	Adarb1	0.470132	0.122999
Mydgf:chr17:56175893	Adarb1	0.469353	0.123706
Cpne7:chr8:123131823	Adarb1	0.469353	0.123706
Snhg11:chr2:158384063	Adarb1	0.468531	0.124455
AW011738:chr4:156209798	Adarb1	0.468531	0.124455
Gm49394:chr7:142653729	Adarb1	0.468531	0.124455
Wasf2:chr4:133199128	Adarb1	-0.468531	0.124455
Flt1:chr5:147638520	Adarb1	-0.468531	0.124455
Iqgap1:chr7:80712366	Adarb1	-0.468531	0.124455
4930453N24Rik:chr16:64762269	Adarb1	-0.468531	0.124455
Osgep:chr14:50916836	Adarb1	0.468126	0.124825
Serinc3:chr2:163627712	Adarb1	-0.468126	0.124825
Tln1:chr4:43543521	Adarb1	0.468126	0.124825
Eef1g:chr19:8976856	Adarb1	0.46788	0.125051
Smg5:chr3:88352181	Adarb1	0.467493	0.125405
Mmgt1:chrX:56587643	Adarb1	0.46667	0.126163
LTO1:chr7:144920388	Adarb1	0.465971	0.126807
Amotl2:chr9:102731975	Adarb1	-0.465971	0.126807
Cdk13:chr13:17804365	Adarb1	0.46585	0.126919
Dusp11:chr6:85944850	Adarb1	-0.4648	0.127893
Dhcr24:chr4:106588571	Adarb1	-0.4648	0.127893
Adgrf5:chr17:43457386	Adarb1	0.4648	0.127893
Gm37494:chr7:39567642	Adarb1	0.4648	0.127893
Vav2:chr2:27263706	Adarb1	0.464073	0.12857
Kdm6b:chr11:69404916	Adarb1	-0.462809	0.129752
Usp45:chr4:21836592	Adarb1	0.462707	0.129848
Mdc1:chr17:35858637	Adarb1	0.462707	0.129848
Man1a:chr10:53905336	Adarb1	-0.462299	0.130232
Nolc1:chr19:46085294	Adarb1	-0.462299	0.130232
Taok1:chr11:77530797	Adarb1	-0.462299	0.130232
Slc12a4:chr8:105955472	Adarb1	0.462299	0.130232
Arf5:chr6:28426461	Adarb1	0.462299	0.130232
Prkar1a:chr11:109650578	Adarb1	0.462299	0.130232
Mrs2:chr13:24989172	Adarb1	0.462299	0.130232
Rnase4:chr14:51104974	Adarb1	0.462299	0.130232
Ank:chr15:27567554	Adarb1	-0.462299	0.130232
Il1r1:chr1:40316127	Adarb1	0.462299	0.130232
Inpp1:chr1:52789206	Adarb1	-0.462299	0.130232
Wdsub1:chr2:59862826	Adarb1	0.462299	0.130232
Stx16:chr2:174093501	Adarb1	0.462299	0.130232
Ints1:chr5:139758463	Adarb1	0.462299	0.130232
Itpr1:chr6:108473569	Adarb1	-0.462299	0.130232
Nckipsd:chr9:108815177	Adarb1	-0.462299	0.130232
Pbx2:chr17:34595299	Adarb1	0.462299	0.130232
Osbpl5:chr7:143704649	Adarb1	-0.462299	0.130232
Trappc11:chr8:47514808	Adarb1	-0.462299	0.130232
Cdk19:chr10:40479740	Adarb1	0.462299	0.130232
Sec24c:chr14:20689418	Adarb1	-0.462299	0.130232
Pdcd7:chr9:65346572	Adarb1	0.462299	0.130232
Acacb:chr5:114248666	Adarb1	-0.462299	0.130232
Mgat3:chr15:80215329	Adarb1	-0.462299	0.130232
Trmt1l:chr1:151443621	Adarb1	0.462299	0.130232
Atpif1:chr4:132531000	Adarb1	0.462299	0.130232
Stxbp2:chr8:3640585	Adarb1	-0.462099	0.13042
Bbs1:chr19:4887688	Adarb1	0.461811	0.130691
Pcdh19:chrX:133583477	Adarb1	-0.461811	0.130691
Flna:chrX:74226649	Adarb1	-0.461538	0.130948
Nt5dc3:chr10:86837257	Adarb1	0.461538	0.130948
Slfn5:chr11:82963265	Adarb1	-0.461538	0.130948
Lin37:chr7:30556118	Adarb1	-0.461538	0.130948
Mcrs1:chr15:99244655	Adarb1	0.461538	0.130948
Bcl2l13:chr6:120892464	Adarb1	0.460082	0.132328
Fas:chr19:34314283	Adarb1	-0.460082	0.132328
Dtx3l:chr16:35928084	Adarb1	-0.460082	0.132328
Sox7:chr14:63949691	Adarb1	-0.460082	0.132328
Ankrd28:chr14:31701519	Adarb1	-0.458947	0.133409
Nrxn1:chr17:90916348	Adarb1	0.458947	0.133409
Cog8:chr8:107047621	Adarb1	0.458947	0.133409
Bace1:chr9:45857039	Adarb1	0.458947	0.133409
Ovca2:chr11:75177359	Adarb1	-0.457758	0.134549
Pdlim7:chr13:55504074	Adarb1	-0.456416	0.135842
Acp2:chr2:91213286	Adarb1	-0.456143	0.136106
Fam219a:chr4:41534860	Adarb1	-0.455856	0.136384
Npc1:chr18:12189888	Adarb1	-0.455344	0.13688
Meg3:chr12:109569316	Adarb1	0.455342	0.136882
Fam219a:chr4:41518514	Adarb1	0.454545	0.137658
Hacd3:chr9:64987584	Adarb1	0.454545	0.137658
Rpl7l1:chr17:46774937	Adarb1	0.454545	0.137658
Selenop:chr15:3280055	Adarb1	-0.454545	0.137658
Frmd5:chr2:121775673	Adarb1	-0.45349	0.138689
Rab4a:chr8:123834117	Adarb1	0.453425	0.138753
Gas8:chr8:123530839	Adarb1	-0.453425	0.138753
Slc19a3:chr1:83028019	Adarb1	0.452634	0.13953
Azi2:chr9:118062624	Adarb1	-0.452634	0.13953
Firre:chrX:50600829	Adarb1	-0.452514	0.139648
Ankrd28:chr14:31700963	Adarb1	-0.452284	0.139875
Nras:chr3:103066806	Adarb1	0.452284	0.139875
Akr1a1:chr4:116637316	Adarb1	0.452284	0.139875
Sirt4:chr5:115478856	Adarb1	0.452029	0.140126
Flnb:chr14:7936041	Adarb1	0.45184	0.140313
Zkscan3:chr13:21392309	Adarb1	0.45184	0.140313
Tnfrsf1b:chr4:145213666	Adarb1	-0.451612	0.140538
Lemd2:chr17:27190196	Adarb1	0.451612	0.140538
Mbd4:chr6:115841075	Adarb1	0.451517	0.140632
Nrg1:chr8:32576098	Adarb1	0.451517	0.140632
Atxn7:chr14:14106277	Adarb1	-0.450715	0.141425
Leprot:chr4:101658240	Adarb1	0.450715	0.141425
Heatr3:chr8:88171856	Adarb1	0.450446	0.141693
St3gal1:chr15:67105663	Adarb1	-0.449768	0.142367
Atl3:chr19:7535571	Adarb1	-0.449768	0.142367
Tor1a:chr2:30961122	Adarb1	0.449768	0.142367
Nfx1:chr4:41002020	Adarb1	0.449768	0.142367
Tmem65:chr15:58823186	Adarb1	0.449768	0.142367
M6pr:chr6:122316420	Adarb1	-0.449126	0.143009
Cnot6:chr11:49678962	Adarb1	-0.44847	0.143665
Iqgap1:chr7:80712040	Adarb1	-0.448337	0.143798
Cox7b:chrX:106018805	Adarb1	0.448337	0.143798
Arl13b:chr16:62794324	Adarb1	0.44788	0.144257
Atp10a:chr7:58663758	Adarb1	-0.44788	0.144257
Abhd2:chr7:79360841	Adarb1	-0.447552	0.144586
Ppp1r15b:chr1:133137544	Adarb1	-0.447552	0.144586
Grcc10:chr6:124739665	Adarb1	0.447552	0.144586
Coro2b:chr9:62422823	Adarb1	-0.447552	0.144586
Dnajc5:chr2:181553743	Adarb1	0.445255	0.146911
Tpst2:chr5:112309783	Adarb1	0.445169	0.146998
Cep68:chr11:20228242	Adarb1	0.445169	0.146998
Mettl7a1:chr15:100313971	Adarb1	0.445169	0.146998
Dynll1:chr5:115297608	Adarb1	0.445035	0.147135
Arhgap31:chr16:38599821	Adarb1	0.44491	0.147261
Tmem69:chr4:116552817	Adarb1	-0.444834	0.147339
Gm11613:chr11:97644864	Adarb1	0.444834	0.147339
Rab14:chr2:35180730	Adarb1	-0.444834	0.147339
Capza2:chr6:17665568	Adarb1	-0.444834	0.147339
Gabpb2:chr3:95183503	Adarb1	0.444834	0.147339
Kdm3b:chr18:34838142	Adarb1	-0.444486	0.147694
Maml1:chr11:50256133	Adarb1	-0.444486	0.147694
5031425E22Rik:chr5:23424485	Adarb1	0.444147	0.14804
Slc1a1:chr19:28913203	Adarb1	-0.442319	0.149915
Malt1:chr18:65478464	Adarb1	-0.442319	0.149915
Sod2:chr17:13019972	Adarb1	0.442108	0.150133
Atp5b:chr10:128088081	Adarb1	-0.441721	0.150532
Ppp1r13b:chr12:111828992	Adarb1	-0.441351	0.150915
B4galt1:chr4:40805006	Adarb1	0.441332	0.150935
Apold1:chr6:134986492	Adarb1	-0.441332	0.150935
Ubtf:chr11:102305022	Adarb1	0.441009	0.151269
Bysl:chr17:47599622	Adarb1	-0.441009	0.151269
Luzp1:chr4:136547286	Adarb1	0.440797	0.151489
Dhx40:chr11:86793224	Adarb1	0.440797	0.151489
Appbp2:chr11:85190346	Adarb1	0.440797	0.151489
Rab4a:chr8:123834114	Adarb1	0.440797	0.151489
Mdm2:chr10:117692640	Adarb1	0.440797	0.151489
Wbp4:chr14:79467303	Adarb1	0.440797	0.151489
Uck2:chr1:167284790	Adarb1	-0.440797	0.151489
Zmynd19:chr2:24953313	Adarb1	0.440797	0.151489
Il6ra:chr3:89887126	Adarb1	-0.440797	0.151489
Macf1:chr4:123390548	Adarb1	-0.440797	0.151489
Ube3b:chr5:114393091	Adarb1	0.440797	0.151489
Gnao1:chr8:93960328	Adarb1	0.440797	0.151489
Mast4:chr13:102735863	Adarb1	-0.440797	0.151489
Sppl2b:chr10:80862242	Adarb1	0.440797	0.151489
Osbpl5:chr7:143694308	Adarb1	0.440797	0.151489
Zc3h10:chr10:128545489	Adarb1	0.440797	0.151489
Rhoj:chr12:75400883	Adarb1	0.440797	0.151489
Rps19bp1:chr15:80261021	Adarb1	0.440797	0.151489
Dlg2:chr7:92143872	Adarb1	-0.440797	0.151489
Afdn:chr17:13828938	Adarb1	0.440797	0.151489
Gpr108:chr17:57243085	Adarb1	0.44059	0.151704
Nr1d1:chr11:98771476	Adarb1	-0.44059	0.151704
Slc44a1:chr4:53566851	Adarb1	0.44059	0.151704
Zmiz2:chr11:6403908	Adarb1	-0.44059	0.151704
Cxcr5:chr9:44511833	Adarb1	0.44059	0.151704
Slitrk3:chr3:73047786	Adarb1	-0.44059	0.151704
Lamp2:chrX:38420316	Adarb1	-0.440559	0.151735
Gnb4:chr3:32584090	Adarb1	-0.440559	0.151735
Abhd2:chr7:79362194	Adarb1	-0.440559	0.151735
Ppp1r15b:chr1:133137982	Adarb1	-0.440559	0.151735
Acvrl1:chr15:101143525	Adarb1	-0.440559	0.151735
C1qtnf4:chr2:90888668	Adarb1	-0.440559	0.151735
Mdc1:chr17:35858643	Adarb1	0.440559	0.151735
Gm29650:chrY:1048726	Adarb1	0.440559	0.151735
Gch1:chr14:47155050	Adarb1	-0.440415	0.151885
Xpnpep3:chr15:81456896	Adarb1	-0.438599	0.153779
Ncl:chr1:86350105	Adarb1	-0.438599	0.153779
Ccnd2:chr6:127130223	Adarb1	-0.438587	0.153791
Sez6l2:chr7:126965012	Adarb1	0.438377	0.154012
Crocc:chr4:141023017	Adarb1	-0.437829	0.154586
Arf3:chr15:98737112	Adarb1	0.437829	0.154586
Abhd2:chr7:79363168	Adarb1	-0.437829	0.154586
Ensa:chr3:95629117	Adarb1	-0.437792	0.154626
Rnf166:chr8:122470736	Adarb1	0.436688	0.155788
Tmpo:chr10:91164130	Adarb1	0.436688	0.155788
Sdf4:chr4:156010675	Adarb1	0.436688	0.155788
Usp35:chr7:97310116	Adarb1	-0.436688	0.155788
Gnl3l:chrX:150985424	Adarb1	0.436631	0.155849
Mkln1:chr6:31515667	Adarb1	0.43509	0.15748
Mier1:chr4:103164739	Adarb1	-0.433566	0.159106
Cds2:chr2:132309645	Adarb1	-0.433566	0.159106
Septin2:chr1:93509108	Adarb1	-0.433566	0.159106
Flt1:chr5:147649680	Adarb1	0.43295	0.159766
Appbp2:chr11:85189963	Adarb1	-0.432688	0.160048
Nrxn3:chr12:90020922	Adarb1	-0.432668	0.160069
Nipa1:chr7:55977620	Adarb1	-0.431582	0.161238
Ptprj:chr2:90548593	Adarb1	0.431455	0.161375
Flt1:chr5:147613188	Adarb1	0.431455	0.161375
Wfdc2:chr2:164563318	Adarb1	0.431411	0.161423
Psmb5:chr14:54614804	Adarb1	0.431411	0.161423
Wasf2:chr4:133196957	Adarb1	-0.431411	0.161423
Mospd3:chr5:137597295	Adarb1	-0.431411	0.161423
Ppp1r37:chr7:19532259	Adarb1	0.431411	0.161423
Ppp1r15b:chr1:133138018	Adarb1	-0.430824	0.162058
Mbd4:chr6:115841062	Adarb1	0.430673	0.162221
Mov10:chr3:104801509	Adarb1	-0.430045	0.162902
Nin:chr12:70026889	Adarb1	-0.430045	0.162902
Erap1:chr13:74673643	Adarb1	-0.430045	0.162902
Spata13:chr14:60762548	Adarb1	-0.430045	0.162902
Src:chr2:157466015	Adarb1	0.430045	0.162902
Plxnd1:chr6:115959320	Adarb1	0.430045	0.162902
Rnf40:chr7:127590707	Adarb1	-0.430045	0.162902
Pds5b:chr5:150801185	Adarb1	0.430045	0.162902
Sik3:chr9:46202055	Adarb1	0.430045	0.162902
Zmpste24:chr4:121061187	Adarb1	0.430045	0.162902
Tapt1:chr5:44178872	Adarb1	0.430045	0.162902
Myof:chr19:37974601	Adarb1	-0.430045	0.162902
Csde1:chr3:103038757	Adarb1	0.430045	0.162902
Agl:chr3:116744083	Adarb1	-0.429825	0.163141
Ro60:chr1:143755824	Adarb1	0.429588	0.163399
Fnbp1:chr2:31026924	Adarb1	-0.429588	0.163399
Nrip3:chr7:109758658	Adarb1	0.429218	0.163802
Sap30bp:chr11:115966483	Adarb1	0.42889	0.16416
Myadm:chr7:3298709	Adarb1	-0.42889	0.16416
Magi2:chr5:20246582	Adarb1	0.42789	0.165253
Abcd4:chr12:84602752	Adarb1	0.427817	0.165333
Slc39a3:chr10:81029931	Adarb1	0.427817	0.165333
Sh2d5:chr4:138260101	Adarb1	-0.427114	0.166105
Nrxn1:chr17:90858633	Adarb1	-0.426573	0.1667
Csnk1a1:chr18:61588396	Adarb1	-0.426573	0.1667
Ucp2:chr7:100498817	Adarb1	0.426573	0.1667
Chtf8:chr8:106885604	Adarb1	0.426573	0.1667
Spock2:chr10:60132527	Adarb1	-0.426573	0.1667
Ovca2:chr11:75176347	Adarb1	0.425486	0.167901
Ube2d2a:chr18:35804988	Adarb1	0.425486	0.167901
Ankrd28:chr14:31701485	Adarb1	-0.425098	0.168331
Ncl:chr1:86345930	Adarb1	0.425098	0.168331
Pfas:chr11:68985936	Adarb1	-0.424564	0.168924
B3gat3:chr19:8924669	Adarb1	0.424052	0.169493
Dynll1:chr5:115297616	Adarb1	0.423555	0.170048
Vamp4:chr1:162598204	Adarb1	0.423555	0.170048
Nrxn1:chr17:90916469	Adarb1	0.422546	0.171176
Colec12:chr18:9882354	Adarb1	-0.422546	0.171176
Cped1:chr6:22065342	Adarb1	0.422546	0.171176
Tom1l2:chr11:60226720	Adarb1	0.422232	0.171528
Ube2b:chr11:51995908	Adarb1	0.422232	0.171528
Anapc2:chr2:25273390	Adarb1	-0.422232	0.171528
Prpf38b:chr3:108903092	Adarb1	-0.422232	0.171528
Pradc1:chr6:85448001	Adarb1	0.422232	0.171528
Fam53a:chr5:33601737	Adarb1	-0.422232	0.171528
Ppp1r16b:chr2:158765099	Adarb1	-0.422232	0.171528
Lrrc32:chr7:98498273	Adarb1	-0.422232	0.171528
Synj2bp:chr12:81511542	Adarb1	0.421753	0.172065
Tom1l2:chr11:60228714	Adarb1	-0.421092	0.17281
Arsa:chr15:89472651	Adarb1	-0.421092	0.17281
Raph1:chr1:60485787	Adarb1	-0.421092	0.17281
Dtx3l:chr16:35928468	Adarb1	-0.421092	0.17281
Psme3:chr11:101322449	Adarb1	0.421092	0.17281
Zbtb34:chr2:33406455	Adarb1	0.420758	0.173186
Dhx40:chr11:86769410	Adarb1	-0.420566	0.173403
D5Ertd579e:chr5:36601812	Adarb1	0.420316	0.173686
Slc35e2:chr4:155622371	Adarb1	0.420316	0.173686
Arpp19:chr9:75057530	Adarb1	0.420206	0.17381
Ntan1:chr16:13834262	Adarb1	-0.420206	0.17381
Rell1:chr5:63909788	Adarb1	-0.420206	0.17381
Rrn3:chr16:13814001	Adarb1	0.419995	0.174049
Gm45837:chr7:101411568	Adarb1	-0.419769	0.174305
Rpa1:chr11:75301041	Adarb1	-0.41958	0.174519
Adap2:chr11:80178849	Adarb1	-0.41958	0.174519
Dcp2:chr18:44424703	Adarb1	0.41958	0.174519
Tbc1d24:chr17:24176488	Adarb1	0.41958	0.174519
Ptprj:chr2:90571524	Adarb1	0.41958	0.174519
9330159F19Rik:chr10:29228095	Adarb1	0.417953	0.176371
Dnajc18:chr18:35674353	Adarb1	0.417193	0.177241
Pbx1:chr1:168156652	Adarb1	-0.41708	0.17737
Rsrc2:chr5:123741299	Adarb1	0.416985	0.177479
Tbce:chr13:14001539	Adarb1	0.416813	0.177675
Sh3kbp1:chrX:159973949	Adarb1	-0.416813	0.177675
Zfp811:chr17:32796133	Adarb1	-0.416436	0.178108
Pdxk:chr10:78439947	Adarb1	0.416046	0.178557
Cds2:chr2:132310706	Adarb1	-0.416046	0.178557
Zyg11b:chr4:108232060	Adarb1	0.415503	0.179182
Ptprk:chr10:28596323	Adarb1	-0.414289	0.180586
Atl1:chr12:69965199	Adarb1	-0.414289	0.180586
Add3:chr19:53245565	Adarb1	0.414195	0.180694
Rpl5:chr5:107905421	Adarb1	0.414195	0.180694
C1d:chr11:17262675	Adarb1	0.413919	0.181015
Myo18a:chr11:77845621	Adarb1	-0.413919	0.181015
Fbxo7:chr10:86030987	Adarb1	0.413919	0.181015
Insig2:chr1:121304753	Adarb1	-0.413919	0.181015
Gatad1:chr5:3647442	Adarb1	-0.413919	0.181015
Zmiz1:chr14:25459537	Adarb1	0.413919	0.181015
Cox6c:chr15:35937612	Adarb1	0.413919	0.181015
Kcnmb1:chr11:33964772	Adarb1	-0.413919	0.181015
Slu7:chr11:43442046	Adarb1	-0.413919	0.181015
Mthfd1:chr12:76300431	Adarb1	-0.413919	0.181015
Slmap:chr14:26418208	Adarb1	0.413919	0.181015
Ncl:chr1:86346408	Adarb1	-0.413919	0.181015
Ubxn4:chr1:128262815	Adarb1	-0.413919	0.181015
Dars:chr1:128378864	Adarb1	0.413919	0.181015
Dab2ip:chr2:35622181	Adarb1	-0.413919	0.181015
Lmna:chr3:88481986	Adarb1	0.413919	0.181015
Ccdc22:chrX:7594589	Adarb1	-0.413919	0.181015
Dhx57:chr17:80248277	Adarb1	-0.413919	0.181015
Map11:chr5:138260894	Adarb1	-0.413919	0.181015
Lsm14b:chr2:180032626	Adarb1	-0.413919	0.181015
Ckap5:chr2:91599303	Adarb1	0.413919	0.181015
Rap1gap:chr4:137725630	Adarb1	-0.413919	0.181015
Serinc4:chr2:121452955	Adarb1	0.413919	0.181015
Deaf1:chr7:141324532	Adarb1	-0.413919	0.181015
Mta2:chr19:8943511	Adarb1	-0.413919	0.181015
Kiz:chr2:146891067	Adarb1	0.413919	0.181015
Trap1:chr16:4044957	Adarb1	0.413053	0.182022
Pdk4:chr6:5484737	Adarb1	-0.413053	0.182022
Per1:chr11:69106904	Adarb1	-0.413053	0.182022
Gls:chr1:52187189	Adarb1	-0.413053	0.182022
Tasor:chr14:27483428	Adarb1	0.413053	0.182022
Rap2c:chrX:51004527	Adarb1	-0.413053	0.182022
3110056K07Rik:chr12:71006566	Adarb1	0.412877	0.182227
Arhgdia:chr11:120579091	Adarb1	0.412587	0.182564
Copa:chr1:172092348	Adarb1	-0.412587	0.182564
Rpsa:chr9:120131419	Adarb1	0.412587	0.182564
Eif2s3y:chrY:1016394	Adarb1	0.412587	0.182564
Qpctl:chr7:19140325	Adarb1	-0.412587	0.182564
Spock2:chr10:60132582	Adarb1	-0.412587	0.182564
N4bp2l2:chr5:150640553	Adarb1	-0.411982	0.183271
Ccser2:chr14:36876268	Adarb1	0.411885	0.183384
Deaf1:chr7:141297897	Adarb1	0.411377	0.18398
Dusp3:chr11:101972725	Adarb1	-0.410529	0.184975
Ggps1:chr13:14052036	Adarb1	-0.409808	0.185824
Qpctl:chr7:19140371	Adarb1	-0.409808	0.185824
Tmem80:chr7:141336691	Adarb1	0.408461	0.187418
Ccdc28b:chr4:129620225	Adarb1	0.408461	0.187418
Kmt2b:chr7:30571030	Adarb1	0.40702	0.189131
Zdhhc5:chr2:84689133	Adarb1	-0.406829	0.189359
Ptprj:chr2:90571529	Adarb1	0.406824	0.189365
Nifk:chr1:118333316	Adarb1	-0.406824	0.189365
Serinc4:chr2:121452022	Adarb1	-0.406495	0.189758
Prpf6:chr2:181654488	Adarb1	0.406305	0.189985
Pdlim7:chr13:55500986	Adarb1	0.406305	0.189985
Ovca2:chr11:75176346	Adarb1	-0.406305	0.189985
Resf1:chr6:149335258	Adarb1	-0.406305	0.189985
Taok1:chr11:77534496	Adarb1	-0.405594	0.190836
Eng:chr2:32676992	Adarb1	0.405594	0.190836
Nol10:chr12:17429618	Adarb1	-0.405594	0.190836
Apcdd1:chr18:62953536	Adarb1	-0.405594	0.190836
Mfap1a:chr2:121492797	Adarb1	-0.405594	0.190836
Rassf1:chr9:107559369	Adarb1	-0.405496	0.190954
Wipf1:chr2:73431495	Adarb1	-0.405496	0.190954
Mrpl49:chr19:6053850	Adarb1	0.403874	0.192906
Pdzd2:chr15:12374476	Adarb1	-0.403565	0.19328
Paip1:chr13:119429073	Adarb1	0.403565	0.19328
Dlg2:chr7:91193934	Adarb1	-0.403565	0.19328
Plekha3:chr2:76675497	Adarb1	-0.403168	0.19376
Xab2:chr8:3619017	Adarb1	-0.403168	0.19376
Mrpl24:chr3:87922734	Adarb1	0.403168	0.19376
Appl2:chr10:83630296	Adarb1	-0.403168	0.19376
Cfap36:chr11:29247089	Adarb1	-0.403168	0.19376
Nelfe:chr17:34856105	Adarb1	0.403168	0.19376
Smc3:chr19:53641911	Adarb1	-0.403168	0.19376
Hgs:chr11:120477184	Adarb1	-0.403168	0.19376
Larp7:chr3:127546927	Adarb1	0.403168	0.19376
Sdf4:chr4:156010202	Adarb1	0.403168	0.19376
Cpne7:chr8:123131758	Adarb1	0.403168	0.19376
Ncoa7:chr10:30645762	Adarb1	-0.403168	0.19376
Gtpbp1:chr15:79719207	Adarb1	-0.403168	0.19376
Cep164:chr9:45775359	Adarb1	-0.403168	0.19376
Tubb2b:chr13:34128518	Adarb1	-0.403168	0.19376
Ifitm2:chr7:140954853	Adarb1	0.403168	0.19376
Aup1:chr6:83057258	Adarb1	-0.403168	0.19376
Pcgf1:chr6:83080572	Adarb1	-0.403168	0.19376
Ptbp2:chr3:119719026	Adarb1	-0.403092	0.193852
Gm29650:chrY:1048867	Adarb1	0.402849	0.194145
Haus2:chr2:120621168	Adarb1	-0.402803	0.194202
Gm21811:chr8:20149865	Adarb1	0.402132	0.195016
Zgpat:chr2:181365693	Adarb1	0.400492	0.197015
Sfxn2:chr19:46596385	Adarb1	0.400002	0.197614
Stip1:chr19:7032641	Adarb1	0.399404	0.198348
Abcg2:chr6:58677418	Adarb1	0.399404	0.198348
Rictor:chr15:6796919	Adarb1	-0.399404	0.198348
Xpnpep3:chr15:81456906	Adarb1	-0.3993	0.198476
Kat8:chr7:127919943	Adarb1	0.3993	0.198476
Ebna1bp2:chr4:118626779	Adarb1	-0.3993	0.198476
Slfn5:chr11:82963491	Adarb1	-0.3993	0.198476
Mdc1:chr17:35858902	Adarb1	0.3993	0.198476
Snapc1l:chr12:73946380	Adarb1	-0.3993	0.198476
Apobec3:chr15:79907602	Adarb1	-0.398813	0.199075
Lap3:chr5:45512447	Adarb1	0.398813	0.199075
Btaf1:chr19:37012286	Adarb1	-0.398813	0.199075
Dennd6a:chr14:26631464	Adarb1	0.398813	0.199075
AW011738:chr4:156209836	Adarb1	0.398813	0.199075
Nf2:chr11:4767141	Adarb1	-0.398601	0.199335
Fam49b:chr15:63931616	Adarb1	0.398601	0.199335
Nfia:chr4:98118563	Adarb1	0.398601	0.199335
Etfrf1:chr6:145216879	Adarb1	0.397698	0.20045
Snrpd2:chr7:19152680	Adarb1	0.397698	0.20045
Dtx3l:chr16:35926832	Adarb1	-0.397698	0.20045
Ap3s2:chr7:79875881	Adarb1	0.397698	0.20045
Tbce:chr13:14002034	Adarb1	0.396418	0.202037
Sfxn2:chr19:46596373	Adarb1	0.395797	0.202808
Rab14:chr2:35181087	Adarb1	-0.395797	0.202808
N4bp2l2:chr5:150641110	Adarb1	-0.395797	0.202808
Iqgap1:chr7:80712397	Adarb1	-0.395797	0.202808
Ccdc28b:chr4:129620220	Adarb1	0.395797	0.202808
Prpf4:chr4:62423987	Adarb1	-0.395797	0.202808
Prxl2c:chr13:64290328	Adarb1	-0.395627	0.20302
Suz12:chr11:80033841	Adarb1	-0.395244	0.203498
Cacna1a:chr8:84639508	Adarb1	0.395244	0.203498
Zbtb16:chr9:48654768	Adarb1	0.395244	0.203498
Vcam1:chr3:116118559	Adarb1	-0.394695	0.204183
C2cd2l:chr9:44311039	Adarb1	-0.394695	0.204183
Filip1l:chr16:57570873	Adarb1	0.394695	0.204183
Atpif1:chr4:132532097	Adarb1	0.394695	0.204183
Axl:chr7:25761455	Adarb1	0.392416	0.207043
Ap2a2:chr7:141629284	Adarb1	-0.392416	0.207043
Tnr:chr1:159573571	Adarb1	0.392416	0.207043
Anapc16:chr10:59988523	Adarb1	-0.392416	0.207043
Nxn:chr11:76278487	Adarb1	-0.392416	0.207043
Npc2:chr12:84755694	Adarb1	-0.392416	0.207043
Zkscan3:chr13:21392376	Adarb1	0.392416	0.207043
Golm1:chr13:59638352	Adarb1	0.392416	0.207043
Dab2:chr15:6431011	Adarb1	0.392416	0.207043
Rilpl2:chr5:124469716	Adarb1	0.392416	0.207043
Gatc:chr5:115333530	Adarb1	0.392416	0.207043
Far2:chr6:148159711	Adarb1	-0.392416	0.207043
Synm:chr7:67733363	Adarb1	-0.392416	0.207043
Zyg11b:chr4:108230955	Adarb1	-0.392416	0.207043
Josd2:chr7:44470330	Adarb1	-0.392416	0.207043
Tmem11:chr11:60864783	Adarb1	0.392416	0.207043
Khnyn:chr14:55894367	Adarb1	-0.392416	0.207043
Socs7:chr11:97398014	Adarb1	-0.3923	0.207191
Nrxn1:chr17:90859033	Adarb1	0.392295	0.207197
Elavl3:chr9:22037098	Adarb1	0.391895	0.207702
Gnl2:chr4:125053021	Adarb1	0.391895	0.207702
Rnf126:chr10:79758939	Adarb1	0.391895	0.207702
Mrpl24:chr3:87921469	Adarb1	0.391608	0.208063
Meg3:chr12:109563691	Adarb1	0.391608	0.208063
Fastk:chr5:24444806	Adarb1	-0.391608	0.208063
Pkd2:chr5:104504979	Adarb1	-0.391608	0.208063
Cpne7:chr8:123131818	Adarb1	0.391608	0.208063
Rbbp4:chr4:129309987	Adarb1	-0.391608	0.208063
Nol10:chr12:17429612	Adarb1	-0.391608	0.208063
Selenot:chr3:58590700	Adarb1	-0.391608	0.208063
Fam32a:chr8:72223815	Adarb1	0.391608	0.208063
Pigq:chr17:25927089	Adarb1	-0.391608	0.208063
Dcun1d3:chr7:119856274	Adarb1	-0.391608	0.208063
Pou2f1:chr1:165867123	Adarb1	-0.391561	0.208123
Kank3:chr17:33819569	Adarb1	-0.391561	0.208123
Lactb2:chr1:13625819	Adarb1	0.391521	0.208174
Gid4:chr11:60444180	Adarb1	0.391083	0.208728
Ifih1:chr2:62596500	Adarb1	-0.391083	0.208728
Gm29650:chrY:1048815	Adarb1	-0.391083	0.208728
Rab8a:chr8:72180552	Adarb1	-0.3899	0.210231
Prxl2c:chr13:64290181	Adarb1	0.3899	0.210231
Mxd4:chr5:34173967	Adarb1	0.3899	0.210231
Trp53i11:chr2:93200074	Adarb1	-0.3899	0.210231
Ncl:chr1:86347802	Adarb1	-0.388792	0.211643
C2cd2:chr16:97857208	Adarb1	0.388792	0.211643
Atp2a3:chr11:72992546	Adarb1	0.388792	0.211643
Sntb2:chr8:107017736	Adarb1	-0.388792	0.211643
Isca2:chr12:84774197	Adarb1	0.388667	0.211804
Yipf5:chr18:40212114	Adarb1	-0.38865	0.211824
Fam76a:chr4:132913754	Adarb1	0.38865	0.211824
Il6st:chr13:112505109	Adarb1	-0.388162	0.212449
Fndc4:chr5:31292665	Adarb1	0.388162	0.212449
Csnk2a1:chr2:152273022	Adarb1	0.387334	0.213512
Nfat5:chr8:107371341	Adarb1	0.387334	0.213512
Mapk1ip1l:chr14:47322513	Adarb1	-0.387334	0.213512
Zc3h7a:chr16:11144711	Adarb1	0.386649	0.214392
Nt5dc3:chr10:86836357	Adarb1	-0.385967	0.215271
E2f4:chr8:105303445	Adarb1	0.385803	0.215483
Cpd:chr11:76781872	Adarb1	0.385516	0.215854
Mettl3:chr14:52295434	Adarb1	0.385516	0.215854
Itih5:chr2:10241062	Adarb1	-0.385516	0.215854
Nrp1:chr8:128359564	Adarb1	0.385516	0.215854
Dcun1d2:chr8:13256263	Adarb1	-0.385516	0.215854
Mpeg1:chr19:12463521	Adarb1	0.385516	0.215854
Son:chr16:91655620	Adarb1	-0.38529	0.216147
Icam1:chr9:21020602	Adarb1	-0.38529	0.216147
Cox14:chr15:99728168	Adarb1	0.384615	0.21702
Hjurp:chr1:88263988	Adarb1	-0.384615	0.21702
AW011738:chr4:156209802	Adarb1	0.384615	0.21702
Plxna1:chr6:89316778	Adarb1	0.384615	0.21702
Bhlhe40:chr6:108665779	Adarb1	-0.384615	0.21702
Ptpn12:chr5:20994197	Adarb1	0.384495	0.217177
Mapkapk2:chr1:131054660	Adarb1	-0.384402	0.217296
Gpr160:chr3:30896148	Adarb1	-0.384402	0.217296
Ncl:chr1:86347736	Adarb1	-0.38431	0.217416
Lrrc4c:chr2:96577347	Adarb1	0.383017	0.219099
2610002M06Rik:chrX:107784383	Adarb1	-0.382762	0.219432
Icam1:chr9:21020585	Adarb1	-0.382762	0.219432
Lix1l:chr3:96624803	Adarb1	-0.382762	0.219432
Dnajc18:chr18:35672493	Adarb1	0.382102	0.220296
Rnf4:chr5:34351582	Adarb1	-0.382102	0.220296
Trim12a:chr7:104311136	Adarb1	0.382102	0.220296
Map4k2:chr19:6354234	Adarb1	-0.381787	0.220708
Slc35e2:chr4:155621916	Adarb1	0.381787	0.220708
Ppp3cc:chr14:70218581	Adarb1	0.381787	0.220708
Slc6a20a:chr9:123642152	Adarb1	-0.381787	0.220708
Snx9:chr17:5930629	Adarb1	0.381665	0.220867
Pnpla6:chr8:3522871	Adarb1	0.381665	0.220867
Rbm25:chr12:83682031	Adarb1	-0.381665	0.220867
Myh10:chr11:68793145	Adarb1	0.381665	0.220867
Cab39l:chr14:59547591	Adarb1	-0.381665	0.220867
Bmp1:chr14:70491437	Adarb1	0.381665	0.220867
Son:chr16:91655973	Adarb1	0.381665	0.220867
Zeb1:chr18:5748805	Adarb1	-0.381665	0.220867
Fgf14:chr14:124268563	Adarb1	0.381665	0.220867
Ilkap:chr1:91376305	Adarb1	0.381665	0.220867
Gfm1:chr3:67443567	Adarb1	0.381665	0.220867
Herc1:chr9:66486939	Adarb1	0.381665	0.220867
Lonp1:chr17:56620338	Adarb1	0.381665	0.220867
Mob1a:chr6:83341366	Adarb1	-0.381665	0.220867
2900026A02Rik:chr5:113089450	Adarb1	0.381665	0.220867
Zfp512:chr5:31480973	Adarb1	0.381665	0.220867
Hip1:chr5:135407809	Adarb1	-0.381535	0.221038
Ankrd28:chr14:31700922	Adarb1	-0.380291	0.222673
Tbc1d24:chr17:24177814	Adarb1	0.37895	0.224445
Gramd1a:chr7:31135109	Adarb1	-0.37895	0.224445
Ccdc84:chr9:44411196	Adarb1	-0.378284	0.225327
Zfp516:chr18:83003120	Adarb1	-0.378284	0.225327
Mier1:chr4:103165402	Adarb1	-0.377622	0.226206
Igfbp7:chr5:77407783	Adarb1	-0.377622	0.226206
9930104L06Rik:chr4:124943291	Adarb1	0.377622	0.226206
Gm49394:chr7:142653273	Adarb1	0.377622	0.226206
Dcun1d3:chr7:119856233	Adarb1	-0.377284	0.226656
Zcchc7:chr4:44924244	Adarb1	0.377059	0.226956
Mllt6:chr11:97683744	Adarb1	0.377059	0.226956
Sh2d5:chr4:138260130	Adarb1	0.377059	0.226956
Colec12:chr18:9882420	Adarb1	-0.376965	0.227081
Dcp2:chr18:44422755	Adarb1	-0.376337	0.22792
Ctxn1:chr8:4258858	Adarb1	0.376337	0.22792
Cyp20a1:chr1:60387825	Adarb1	-0.376337	0.22792
Gm10687:chr9:44123972	Adarb1	0.376337	0.22792
Sez6l:chr5:112463251	Adarb1	0.375372	0.229211
Mier1:chr4:103164955	Adarb1	-0.374782	0.230003
Serinc3:chr2:163627171	Adarb1	-0.374441	0.23046
Deptor:chr15:55257996	Adarb1	0.374441	0.23046
Gm28035:chr2:30274102	Adarb1	-0.374304	0.230645
Polr3f:chr2:144540439	Adarb1	0.373912	0.231173
Serinc3:chr2:163624251	Adarb1	-0.373249	0.232068
Mettl3:chr14:52295422	Adarb1	0.373249	0.232068
Nfia:chr4:98118560	Adarb1	0.373249	0.232068
Mthfr:chr4:148056360	Adarb1	-0.373249	0.232068
Sntb2:chr8:107017753	Adarb1	0.373249	0.232068
9530068E07Rik:chr11:52408610	Adarb1	0.373233	0.232089
Zhx2:chr15:57822542	Adarb1	-0.372872	0.232576
Ssu72:chr4:155715925	Adarb1	-0.371279	0.234737
Gm29650:chrY:1048870	Adarb1	0.371279	0.234737
Ggcx:chr6:72430557	Adarb1	0.371279	0.234737
Stam:chr2:14147991	Adarb1	-0.371046	0.235054
Ube2b:chr11:51990565	Adarb1	0.370914	0.235233
Unc79:chr12:103168440	Adarb1	0.370914	0.235233
Smndc1:chr19:53381335	Adarb1	-0.370914	0.235233
Psmd1:chr1:86071888	Adarb1	0.370914	0.235233
Epha4:chr1:77401300	Adarb1	0.370914	0.235233
Mrc1:chr2:14321906	Adarb1	-0.370914	0.235233
4933434E20Rik:chr3:90061565	Adarb1	-0.370914	0.235233
Tln1:chr4:43555156	Adarb1	0.370914	0.235233
Mecr:chr4:131867522	Adarb1	0.370914	0.235233
Lcmt1:chr7:123418237	Adarb1	0.370914	0.235233
Arhgap17:chr7:123286903	Adarb1	0.370914	0.235233
Erlin2:chr8:27039129	Adarb1	-0.370914	0.235233
Mtmr2:chr9:13804931	Adarb1	-0.370914	0.235233
Micall1:chr15:79135154	Adarb1	0.370914	0.235233
Phldb2:chr16:45808461	Adarb1	-0.370914	0.235233
Dnm2:chr9:21467631	Adarb1	0.370914	0.235233
Cnot1:chr8:95734070	Adarb1	0.370914	0.235233
Ipo7:chr7:110050856	Adarb1	0.370914	0.235233
Eml3:chr19:8936669	Adarb1	0.370914	0.235233
Pank3:chr11:35786841	Adarb1	0.370657	0.235583
Tpd52l2:chr2:181515406	Adarb1	-0.370629	0.235621
Utrn:chr10:12382762	Adarb1	-0.370629	0.235621
Ptprj:chr2:90548589	Adarb1	0.370629	0.235621
Cds2:chr2:132309656	Adarb1	-0.370629	0.235621
Selenot:chr3:58590817	Adarb1	-0.370629	0.235621
Gm49394:chr7:142652557	Adarb1	0.370629	0.235621
Slc25a51:chr4:45397058	Adarb1	0.370629	0.235621
Sez6l2:chr7:126965261	Adarb1	-0.370385	0.235954
Amotl2:chr9:102731873	Adarb1	-0.370281	0.236096
Prpf6:chr2:181654477	Adarb1	0.370239	0.236153
Pla2g15:chr8:106163970	Adarb1	0.369808	0.236742
Cfap300:chr9:8022072	Adarb1	-0.369808	0.236742
Erp29:chr5:121447549	Adarb1	-0.369501	0.237162
Tra2a:chr6:49254768	Adarb1	0.368831	0.238079
Rpa1:chr11:75300643	Adarb1	0.368423	0.238639
Zfp609:chr9:65692631	Adarb1	0.367776	0.239528
Snhg11:chr2:158383930	Adarb1	0.367776	0.239528
Zfp771:chr7:127254397	Adarb1	0.367567	0.239816
Heatr3:chr8:88171871	Adarb1	0.367305	0.240177
Ddx39b:chr17:35252530	Adarb1	0.367158	0.24038
Alas2:chrX:150560817	Adarb1	-0.367158	0.24038
Cln8:chr8:14897468	Adarb1	0.367158	0.24038
Emp1:chr6:135381720	Adarb1	0.367158	0.24038
Idh3a:chr9:54601162	Adarb1	0.367158	0.24038
Fndc3a:chr14:72539218	Adarb1	-0.367158	0.24038
Larp1:chr11:58060697	Adarb1	-0.367158	0.24038
Ecm2:chr13:49531387	Adarb1	-0.367158	0.24038
Ptges:chr2:30891685	Adarb1	-0.367158	0.24038
Ide:chr19:37269309	Adarb1	-0.367158	0.24038
Mdc1:chr17:35858670	Adarb1	0.367158	0.24038
Klhl24:chr16:20128066	Adarb1	0.367158	0.24038
Lrrc61:chr6:48569733	Adarb1	0.367158	0.24038
4930402H24Rik:chr2:130779292	Adarb1	-0.36703	0.240556
Cabp1:chr5:115177176	Adarb1	0.366873	0.240773
Ddx6:chr9:44638191	Adarb1	-0.366606	0.241142
Kif3b:chr2:153332693	Adarb1	-0.366506	0.24128
Pygb:chr2:150831059	Adarb1	0.366506	0.24128
Chst11:chr10:83194710	Adarb1	-0.366506	0.24128
Septin2:chr1:93509128	Adarb1	-0.366206	0.241694
Zfp811:chr17:32796511	Adarb1	0.366206	0.241694
Fus:chr7:127982770	Adarb1	-0.36612	0.241813
Pttg1:chr11:43420697	Adarb1	0.365768	0.2423
Dagla:chr19:10245696	Adarb1	0.364915	0.243485
Cbfa2t2:chr2:154537442	Adarb1	-0.364915	0.243485
Tra2a:chr6:49254660	Adarb1	0.364915	0.243485
Gm10557:chr18:4198657	Adarb1	0.364915	0.243485
Grik5:chr7:25010408	Adarb1	0.364274	0.244376
Sod2:chr17:13020010	Adarb1	0.363636	0.245265
Bgn:chrX:73494847	Adarb1	-0.363636	0.245265
Timp2:chr11:118303412	Adarb1	-0.363636	0.245265
Shoc2:chr19:54032975	Adarb1	-0.363047	0.246089
N4bp2l2:chr5:150638225	Adarb1	0.362759	0.246491
Ctso:chr3:81954315	Adarb1	0.362557	0.246774
Pla2g15:chr8:106164372	Adarb1	-0.362557	0.246774
Ankrd28:chr14:31701448	Adarb1	-0.362036	0.247504
Grk2:chr19:4286531	Adarb1	0.362036	0.247504
Foxp1:chr6:99147618	Adarb1	-0.362036	0.247504
Hspa4:chr11:53261131	Adarb1	0.36196	0.247611
Gsr:chr8:33697541	Adarb1	-0.36196	0.247611
Lrrc4c:chr2:96577353	Adarb1	0.361406	0.248389
Selenop:chr15:3279954	Adarb1	-0.360771	0.249283
Tbc1d9b:chr11:50165566	Adarb1	0.360771	0.249283
Irgm2:chr11:58221590	Adarb1	0.360771	0.249283
Frmd5:chr2:121775676	Adarb1	0.360771	0.249283
Smim14:chr5:65448046	Adarb1	0.360771	0.249283
Dld:chr12:31331883	Adarb1	-0.360444	0.249743
Myo18a:chr11:77843552	Adarb1	0.360163	0.25014
Rmnd5b:chr11:51627048	Adarb1	0.360163	0.25014
Stk11:chr10:80130586	Adarb1	0.360163	0.25014
Slbp:chr5:33646026	Adarb1	-0.360163	0.25014
Cuedc1:chr11:88183343	Adarb1	0.360163	0.25014
Lama4:chr10:39097205	Adarb1	0.360163	0.25014
Itsn2:chr12:4635600	Adarb1	0.360163	0.25014
Per1:chr11:69103386	Adarb1	-0.360163	0.25014
Ktn1:chr14:47686326	Adarb1	0.360163	0.25014
Clk1:chr1:58414204	Adarb1	-0.360163	0.25014
Baz2b:chr2:59912814	Adarb1	-0.360163	0.25014
Atp2b3:chrX:73551477	Adarb1	-0.360163	0.25014
Itfg1:chr8:85836391	Adarb1	0.360163	0.25014
Drc7:chr8:95068164	Adarb1	-0.360163	0.25014
Zyg11b:chr4:108233278	Adarb1	-0.360163	0.25014
Mlc1:chr15:88963453	Adarb1	0.360163	0.25014
Fmnl2:chr2:52872345	Adarb1	0.360163	0.25014
Elmsan1:chr12:84174384	Adarb1	-0.360163	0.25014
Tom1:chr8:75051996	Adarb1	0.360163	0.25014
Ppp4r1:chr17:65836046	Adarb1	-0.360163	0.25014
Gm1976:chr17:94760331	Adarb1	0.360163	0.25014
Ddi2:chr4:141678367	Adarb1	-0.360163	0.25014
Eaf1:chr14:31509481	Adarb1	-0.359488	0.251095
Zkscan3:chr13:21389904	Adarb1	0.359164	0.251553
Elk4:chr1:132025719	Adarb1	0.359164	0.251553
Camk2n2:chr16:20619965	Adarb1	0.359164	0.251553
Nol10:chr12:17429681	Adarb1	-0.359164	0.251553
Stx5a:chr19:8746531	Adarb1	0.358708	0.252199
Pfas:chr11:68985957	Adarb1	0.358708	0.252199
Snrnp48:chr13:38220600	Adarb1	0.358708	0.252199
Mmut:chr17:40960811	Adarb1	0.358708	0.252199
Tra2a:chr6:49259125	Adarb1	-0.358708	0.252199
Ywhae:chr11:75744278	Adarb1	0.358688	0.252227
Echs1:chr7:140105804	Adarb1	0.358008	0.253194
Paip1:chr13:119429043	Adarb1	-0.357979	0.253234
Vps11:chr9:44356241	Adarb1	0.357979	0.253234
Tmx2:chr2:84671440	Adarb1	0.357979	0.253234
Fastk:chr5:24444637	Adarb1	-0.357897	0.253351
Gnl3l:chrX:150984526	Adarb1	-0.3578	0.25349
Ptprj:chr2:90548325	Adarb1	0.3578	0.25349
Ncl:chr1:86345492	Adarb1	-0.3578	0.25349
Miat:chr5:112215820	Adarb1	-0.3578	0.25349
Dynll1:chr5:115299242	Adarb1	-0.357268	0.254246
Sppl2a:chr2:126891470	Adarb1	-0.357268	0.254246
Eapp:chr12:54672358	Adarb1	0.357268	0.254246
Man2a2:chr7:80349696	Adarb1	0.357268	0.254246
Apobec3:chr15:79907515	Adarb1	-0.356911	0.254756
Gbf1:chr19:46274121	Adarb1	-0.356649	0.25513
Atp10a:chr7:58663736	Adarb1	0.356643	0.255138
Sppl2a:chr2:126891483	Adarb1	0.356643	0.255138
Slc27a1:chr8:71586599	Adarb1	0.356643	0.255138
Dtx3l:chr16:35926916	Adarb1	-0.356643	0.255138
H2-T24:chr17:36006441	Adarb1	0.356643	0.255138
Mdc1:chr17:35858620	Adarb1	0.356643	0.255138
Bmpr2:chr1:59874208	Adarb1	0.356643	0.255138
Nampt:chr12:32850670	Adarb1	-0.356643	0.255138
Nebl:chr2:17348286	Adarb1	-0.356643	0.255138
Pecam1:chr11:106662624	Adarb1	0.355976	0.256093
Zkscan3:chr13:21389919	Adarb1	0.355976	0.256093
Ywhae:chr11:75744449	Adarb1	0.355928	0.25616
Tbc1d4:chr14:101507304	Adarb1	-0.355928	0.25616
Ovca2:chr11:75176447	Adarb1	-0.355928	0.25616
Ankrd13a:chr5:114804423	Adarb1	-0.355928	0.25616
Mfap1a:chr2:121492787	Adarb1	-0.355306	0.257052
Adss:chr1:177773609	Adarb1	0.354787	0.257796
Taok1:chr11:77533507	Adarb1	0.354787	0.257796
Fmc1:chr6:38539277	Adarb1	0.354787	0.257796
Tsc22d1:chr14:76418908	Adarb1	-0.354787	0.257796
Tmx3:chr18:90537141	Adarb1	0.354787	0.257796
Lin7c:chr2:109900173	Adarb1	0.354787	0.257796
Tyro3:chr2:119817673	Adarb1	-0.354787	0.257796
Rrbp1:chr2:143990158	Adarb1	0.354787	0.257796
Col1a2:chr6:4537190	Adarb1	0.354787	0.257796
Nucb2:chr7:116535998	Adarb1	-0.354787	0.257796
Ppp1r21:chr17:88583967	Adarb1	0.354787	0.257796
Pnpla8:chr12:44308020	Adarb1	-0.354787	0.257796
Scd1:chr19:44400340	Adarb1	0.354787	0.257796
Fam91a1:chr15:58455861	Adarb1	-0.354787	0.257796
Tsr1:chr11:74908625	Adarb1	0.354787	0.257796
Baz2a:chr10:128119805	Adarb1	0.354787	0.257796
Slc7a1:chr5:148352143	Adarb1	0.354787	0.257796
Arid4a:chr12:71098199	Adarb1	0.354787	0.257796
Cmc4:chrX:75405191	Adarb1	-0.354787	0.257796
Vat1:chr11:101460013	Adarb1	-0.354571	0.258107
N4bp2l2:chr5:150640816	Adarb1	0.354388	0.25837
Ltbp4:chr7:27325703	Adarb1	-0.354388	0.25837
Pdlim7:chr13:55502062	Adarb1	0.354388	0.25837
Mob3a:chr10:80686435	Adarb1	-0.353766	0.259267
Mrpl24:chr3:87921451	Adarb1	0.353766	0.259267
Wipi2:chr5:142669236	Adarb1	-0.353766	0.259267
Slc7a2:chr8:40917799	Adarb1	-0.353766	0.259267
Iws1:chr18:32102928	Adarb1	0.353766	0.259267
Nf2:chr11:4766026	Adarb1	-0.353766	0.259267
Cldn12:chr5:5505727	Adarb1	0.353639	0.259449
Lix1l:chr3:96624574	Adarb1	-0.353639	0.259449
Rrn3:chr16:13814003	Adarb1	0.353009	0.260359
Ppp1r15b:chr1:133137342	Adarb1	-0.352747	0.260737
Nrxn1:chr17:90916701	Adarb1	-0.352369	0.261285
Camkv:chr9:107949313	Adarb1	0.352121	0.261643
Cdk13:chr13:17804302	Adarb1	0.351499	0.262547
Ncl:chr1:86350051	Adarb1	-0.350839	0.263506
Sbno1:chr5:124369605	Adarb1	0.350839	0.263506
Ctdsp1:chr1:74396315	Adarb1	0.350347	0.264222
Pxmp4:chr2:154586610	Adarb1	-0.350263	0.264344
Psmb1:chr17:15475865	Adarb1	-0.350263	0.264344
Ywhae:chr11:75744450	Adarb1	0.350263	0.264344
Iws1:chr18:32102529	Adarb1	0.350263	0.264344
Mob3a:chr10:80685976	Adarb1	0.34965	0.265239
Grik5:chr7:25010643	Adarb1	-0.34965	0.265239
Rpa1:chr11:75300977	Adarb1	0.34965	0.265239
Dusp3:chr11:101972717	Adarb1	-0.34965	0.265239
Zfp651:chr9:121768700	Adarb1	0.34965	0.265239
Furin:chr7:80390142	Adarb1	-0.34965	0.265239
Rasa2:chr9:96540093	Adarb1	-0.34965	0.265239
Ilf2:chr3:90486482	Adarb1	0.349479	0.26549
Nrxn2:chr19:6530809	Adarb1	0.349479	0.26549
Cxcl12:chr6:117176731	Adarb1	-0.349479	0.26549
Rtn4rl2:chr2:84872325	Adarb1	0.349371	0.265648
Wipi2:chr5:142669276	Adarb1	-0.34922	0.265868
Vps13d:chr4:144972813	Adarb1	-0.34881	0.266468
Slc4a7:chr14:14798367	Adarb1	0.3488	0.266483
Sp3:chr2:72937548	Adarb1	-0.3488	0.266483
Cfap300:chr9:8021805	Adarb1	-0.3488	0.266483
Rad52:chr6:119921408	Adarb1	0.348055	0.267576
Sco1:chr11:67064649	Adarb1	-0.348055	0.267576
Gnl3l:chrX:150985653	Adarb1	-0.347371	0.268581
Mrpl24:chr3:87922716	Adarb1	0.347107	0.268969
R3hdm2:chr10:127467384	Adarb1	0.347107	0.268969
Rhbdl1:chr17:25834953	Adarb1	0.347107	0.268969
Ccdc84:chr9:44411206	Adarb1	-0.346761	0.269479
Haus2:chr2:120620614	Adarb1	0.346309	0.270145
Inpp5d:chr1:87720092	Adarb1	0.345252	0.271709
Hinfp:chr9:44292630	Adarb1	-0.34525	0.271711
Cds2:chr2:132309872	Adarb1	0.34525	0.271711
Nol10:chr12:17429851	Adarb1	-0.34525	0.271711
Ascc2:chr11:4679531	Adarb1	0.344036	0.273513
Plec:chr15:76178919	Adarb1	0.344036	0.273513
Uhrf2:chr19:30088528	Adarb1	0.344036	0.273513
Tspan17:chr13:54794492	Adarb1	0.344036	0.273513
Ptpn14:chr1:189850096	Adarb1	-0.344036	0.273513
Dipk1a:chr5:107924691	Adarb1	-0.344036	0.273513
Emc3:chr6:113520541	Adarb1	-0.344036	0.273513
Rgs10:chr7:128373982	Adarb1	-0.344036	0.273513
Scap:chr9:110383555	Adarb1	-0.344036	0.273513
Pxk:chr14:8141474	Adarb1	0.344036	0.273513
Ambra1:chr2:91917944	Adarb1	0.344036	0.273513
Trrap:chr5:144832952	Adarb1	0.344036	0.273513
Rnf157:chr11:116394498	Adarb1	0.344036	0.273513
Supt7l:chr5:31515173	Adarb1	-0.344036	0.273513
Dnaaf3:chr7:4527983	Adarb1	0.344036	0.273513
Clip2:chr5:134492227	Adarb1	-0.344036	0.273513
Cpne1:chr2:156072791	Adarb1	0.344036	0.273513
Galnt2l:chr8:122491206	Adarb1	-0.344036	0.273513
Sfxn2:chr19:46595207	Adarb1	-0.343395	0.274467
Ankrd28:chr14:31700629	Adarb1	-0.343258	0.274671
Rpsa-ps10:chr3:150072730	Adarb1	-0.343258	0.274671
Trim25:chr11:89017143	Adarb1	-0.343112	0.274889
Map3k3:chr11:106117571	Adarb1	0.343112	0.274889
Sdc3:chr4:130823900	Adarb1	-0.343112	0.274889
Fastk:chr5:24444846	Adarb1	0.343112	0.274889
Rgl2:chr17:33936521	Adarb1	-0.343112	0.274889
Ccnyl1:chr1:64724761	Adarb1	0.343112	0.274889
Snhg11:chr2:158384950	Adarb1	0.342657	0.275567
Plcb1:chr2:135416778	Adarb1	0.342657	0.275567
Ddb2:chr2:91234398	Adarb1	0.342657	0.275567
Scube1:chr15:83656427	Adarb1	0.342657	0.275567
Snhg11:chr2:158383535	Adarb1	-0.342657	0.275567
Ncstn:chr1:172074326	Adarb1	-0.341158	0.277812
Nek7:chr1:138486874	Adarb1	-0.341158	0.277812
Ap1s1:chr5:137035510	Adarb1	0.340803	0.278344
Kdm6b:chr11:69404787	Adarb1	-0.340803	0.278344
Itih5:chr2:10252144	Adarb1	0.340803	0.278344
Gtpbp1:chr15:79721276	Adarb1	-0.340803	0.278344
Itga1:chr13:114959320	Adarb1	-0.340649	0.278576
Zfp397:chr18:23960405	Adarb1	0.34046	0.27886
Cbfa2t2:chr2:154537930	Adarb1	0.340353	0.279021
Serpinb9:chr13:33017792	Adarb1	-0.339953	0.279623
Cdk13:chr13:17804548	Adarb1	-0.339755	0.27992
Tom1l2:chr11:60240092	Adarb1	-0.339755	0.27992
Agl:chr3:116744146	Adarb1	0.339755	0.27992
Gas8:chr8:123535215	Adarb1	0.339755	0.27992
Agps:chr2:75928341	Adarb1	0.339755	0.27992
Tbc1d24:chr17:24176124	Adarb1	0.339755	0.27992
Septin8:chr11:53542541	Adarb1	-0.339621	0.280123
Tspan5:chr3:138742599	Adarb1	-0.339621	0.280123
Dusp11:chr6:85955387	Adarb1	0.339621	0.280123
Wnk1:chr6:120037716	Adarb1	-0.339621	0.280123
Cadm2:chr16:67253405	Adarb1	-0.339621	0.280123
5031425E22Rik:chr5:23424889	Adarb1	0.339621	0.280123
Gm10687:chr9:44124086	Adarb1	0.339621	0.280123
Bvht:chr18:61644322	Adarb1	-0.339621	0.280123
Icam1:chr9:21020521	Adarb1	-0.338037	0.282517
Calm2:chr17:87434279	Adarb1	0.337834	0.282823
Pum2:chr12:8749777	Adarb1	-0.336997	0.284094
Caprin1:chr2:103766488	Adarb1	-0.336581	0.284727
Plxnd1:chr6:115955084	Adarb1	0.336253	0.285226
Slc35e1:chr8:72482233	Adarb1	-0.33591	0.285749
Iws1:chr18:32102895	Adarb1	0.33591	0.285749
Rpa1:chr11:75300577	Adarb1	0.335664	0.286123
Abhd2:chr7:79360768	Adarb1	-0.335664	0.286123
Atf7:chr15:102529238	Adarb1	-0.335664	0.286123
Armc6:chr8:70220468	Adarb1	-0.335314	0.286658
Cflar:chr1:58754036	Adarb1	-0.335314	0.286658
Gas8:chr8:123534724	Adarb1	0.33518	0.286862
Cdh22:chr2:165111763	Adarb1	-0.33518	0.286862
Ptprj:chr2:90571478	Adarb1	0.334573	0.287791
Tmem80:chr7:141336690	Adarb1	0.334573	0.287791
Ppp1r15b:chr1:133137583	Adarb1	-0.334573	0.287791
Fitm2:chr2:163468445	Adarb1	-0.334181	0.288391
Ggps1:chr13:14053441	Adarb1	-0.333924	0.288785
Sp3:chr2:72938227	Adarb1	-0.333552	0.289355
Agpat3:chr10:78285114	Adarb1	-0.333285	0.289766
Tomm34:chr2:164064970	Adarb1	-0.333285	0.289766
Abcd4:chr12:84613984	Adarb1	0.333285	0.289766
Ndufa10:chr1:92470979	Adarb1	-0.333285	0.289766
Ube2j1:chr4:33051659	Adarb1	0.333285	0.289766
Cachd1:chr4:101002883	Adarb1	0.333285	0.289766
Adgrb2:chr4:129992823	Adarb1	-0.333285	0.289766
Cul1:chr6:47502550	Adarb1	0.333285	0.289766
Hinfp:chr9:44292620	Adarb1	-0.333285	0.289766
Inafm1:chr7:16273552	Adarb1	-0.333285	0.289766
Sphk2:chr7:45711788	Adarb1	0.332837	0.290455
Grik5:chr7:25010305	Adarb1	-0.33275	0.290588
Cds2:chr2:132309636	Adarb1	0.33275	0.290588
Rsrc2:chr5:123741287	Adarb1	0.33275	0.290588
Cpne7:chr8:123131825	Adarb1	0.33275	0.290588
Exosc10:chr4:148577752	Adarb1	0.332138	0.291532
Cpne1:chr2:156072264	Adarb1	-0.331615	0.292339
Ankrd28:chr14:31701444	Adarb1	-0.331013	0.293268
Rab8b:chr9:66844522	Adarb1	-0.331013	0.293268
Eapp:chr12:54671708	Adarb1	0.330994	0.293298
Erlin2:chr8:27039550	Adarb1	-0.330549	0.293988
Evi5:chr5:107746891	Adarb1	0.330442	0.294153
Dph3:chr14:32081077	Adarb1	-0.330442	0.294153
Arcn1:chr9:44758588	Adarb1	0.330442	0.294153
Wdr70:chr15:8092783	Adarb1	0.330442	0.294153
Slc35e2:chr4:155621909	Adarb1	0.329827	0.295108
Itih5:chr2:10252270	Adarb1	-0.329247	0.296007
Ncl:chr1:86347928	Adarb1	0.329247	0.296007
Sppl2a:chr2:126891538	Adarb1	-0.329247	0.296007
Tra2a:chr6:49254877	Adarb1	0.329101	0.296235
Eapp:chr12:54671695	Adarb1	0.329101	0.296235
Eloc:chr1:16646834	Adarb1	0.329101	0.296235
Slc39a14:chr14:70305511	Adarb1	-0.328676	0.296896
Ncl:chr1:86345862	Adarb1	-0.328676	0.296896
Ppib:chr9:66064455	Adarb1	0.328676	0.296896
Ppp1r15b:chr1:133137346	Adarb1	-0.328676	0.296896
Cog3:chr14:75719720	Adarb1	-0.328671	0.296904
Tgoln1:chr6:72608971	Adarb1	-0.328671	0.296904
Gm49394:chr7:142652607	Adarb1	0.328671	0.296904
Ccnyl1:chr1:64724896	Adarb1	-0.328671	0.296904
Mob3a:chr10:80685386	Adarb1	-0.328647	0.296942
Dtx3l:chr16:35928517	Adarb1	-0.328445	0.297257
Arhgef15:chr11:68954542	Adarb1	-0.32823	0.297592
Nfx1:chr4:41025845	Adarb1	-0.328055	0.297865
Dtx3l:chr16:35928860	Adarb1	0.328049	0.297875
Mapk1ip1l:chr14:47320790	Adarb1	-0.327516	0.298707
Fbxl17:chr17:63499597	Adarb1	0.327516	0.298707
Copa:chr1:172092318	Adarb1	-0.327516	0.298707
Magt1:chrX:105969244	Adarb1	0.327516	0.298707
Gabpb2:chr3:95183527	Adarb1	-0.327516	0.298707
Dtx3l:chr16:35928508	Adarb1	-0.327516	0.298707
Ilrun:chr17:27820455	Adarb1	-0.327516	0.298707
Cttnbp2nl:chr3:105003354	Adarb1	-0.327454	0.298804
Tmco6:chr18:36741291	Adarb1	-0.326916	0.299645
Gm28035:chr2:30274062	Adarb1	-0.326916	0.299645
Arpc2:chr1:74267434	Adarb1	0.326894	0.29968
Ankrd28:chr14:31700627	Adarb1	0.326301	0.300609
Grin1:chr2:25300761	Adarb1	-0.326301	0.300609
Spns2:chr11:72452095	Adarb1	-0.326301	0.300609
Ecm2:chr13:49532082	Adarb1	-0.325745	0.301483
Nol10:chr12:17429808	Adarb1	0.325745	0.301483
Flnb:chr14:7937179	Adarb1	0.325745	0.301483
Ncl:chr1:86345916	Adarb1	0.325745	0.301483
Coq7:chr7:118527449	Adarb1	0.324516	0.303417
Itpa:chr2:130681347	Adarb1	-0.324516	0.303417
Ankrd28:chr14:31701508	Adarb1	-0.323952	0.304307
Ube2d3:chr3:135466004	Adarb1	-0.323952	0.304307
Angptl2:chr2:33243928	Adarb1	0.323875	0.304428
Gga1:chr15:78883301	Adarb1	0.323875	0.304428
Phrf1:chr7:141261441	Adarb1	-0.323875	0.304428
Calcrl:chr2:84332775	Adarb1	-0.322242	0.307014
Slc6a6:chr6:91756491	Adarb1	-0.322242	0.307014
Hsp25-ps1:chr13:45078569	Adarb1	-0.322235	0.307025
Lamc3:chr2:31946249	Adarb1	0.321678	0.30791
Flna:chrX:74226650	Adarb1	-0.321678	0.30791
Gabpb2:chr3:95183941	Adarb1	0.321678	0.30791
Atpif1:chr4:132530990	Adarb1	0.321678	0.30791
Gnl3l:chrX:150984257	Adarb1	0.321678	0.30791
Bmpr2:chr1:59873142	Adarb1	-0.321678	0.30791
Cpne3:chr4:19521000	Adarb1	-0.321263	0.30857
G3bp2:chr5:92066536	Adarb1	-0.321263	0.30857
Cbl:chr9:44143260	Adarb1	-0.321263	0.30857
Gm21811:chr8:20145623	Adarb1	-0.321263	0.30857
Zfp704:chr3:9429003	Adarb1	0.321	0.308989
Zkscan3:chr13:21389906	Adarb1	0.321	0.308989
Thrap3:chr4:126169867	Adarb1	0.32098	0.30902
Dennd1a:chr2:37805538	Adarb1	0.320917	0.309121
Noc2l:chr4:156247512	Adarb1	0.320917	0.309121
Eapp:chr12:54672264	Adarb1	0.320415	0.309922
Mcts1:chrX:38607093	Adarb1	0.320355	0.310017
Timm44:chr8:4260088	Adarb1	-0.320355	0.310017
Glis2:chr16:4615112	Adarb1	0.320355	0.310017
Ifitm3:chr7:141009595	Adarb1	0.320355	0.310017
Pcmtd1:chr1:7170233	Adarb1	0.320355	0.310017
5031425E22Rik:chr5:23424713	Adarb1	0.320355	0.310017
Cdh20:chr1:104781968	Adarb1	0.319864	0.310802
Mydgf:chr17:56175996	Adarb1	-0.319718	0.311035
Atp10a:chr7:58663818	Adarb1	0.319718	0.311035
Mmgt1:chrX:56586285	Adarb1	0.319718	0.311035
N4bp2l2:chr5:150638269	Adarb1	0.3193	0.311704
Sod2:chr17:13020004	Adarb1	-0.31905	0.312104
Hipk1:chr3:103741711	Adarb1	0.31905	0.312104
Fastk:chr5:24444655	Adarb1	-0.31905	0.312104
Scarf1:chr11:75518737	Adarb1	0.31905	0.312104
Reep2:chr18:34846674	Adarb1	-0.31905	0.312104
Mmgt1:chrX:56587021	Adarb1	0.31905	0.312104
Nt5dc3:chr10:86837287	Adarb1	-0.31874	0.312602
Tbc1d4:chr14:101442780	Adarb1	0.31874	0.312602
Dusp3:chr11:101974191	Adarb1	0.317248	0.314998
Ppp1r12c:chr7:4501623	Adarb1	0.317248	0.314998
Ap2a2:chr7:141632474	Adarb1	-0.316909	0.315544
Slc7a6:chr8:106181784	Adarb1	0.316909	0.315544
Deaf1:chr7:141297885	Adarb1	0.316508	0.316191
Sae1:chr7:16328105	Adarb1	-0.316349	0.316447
Ahdc1:chr4:133065867	Adarb1	0.316195	0.316696
2900026A02Rik:chr5:113088031	Adarb1	-0.316195	0.316696
Psma3:chr12:70995171	Adarb1	-0.315237	0.318245
Mfap1a:chr2:121492869	Adarb1	0.315237	0.318245
Tra2a:chr6:49258794	Adarb1	0.315237	0.318245
Grik5:chr7:25010650	Adarb1	-0.314685	0.319139
Nrxn1:chr17:90859034	Adarb1	0.314685	0.319139
Gnl3l:chrX:150985654	Adarb1	-0.314685	0.319139
Slc19a3:chr1:83028073	Adarb1	0.314685	0.319139
Hip1:chr5:135408861	Adarb1	-0.314685	0.319139
2410131K14Rik:chr5:118265902	Adarb1	0.314142	0.32002
Serbp1:chr6:67284680	Adarb1	-0.314142	0.32002
Ppm1b:chr17:85013119	Adarb1	0.313945	0.32034
Mob3a:chr10:80685987	Adarb1	0.313217	0.321525
Dusp11:chr6:85955365	Adarb1	-0.313217	0.321525
Tob2:chr15:81849480	Adarb1	-0.313217	0.321525
Bmpr2:chr1:59874223	Adarb1	0.313217	0.321525
Grcc10:chr6:124739687	Adarb1	0.313217	0.321525
Nrxn3:chr12:90020096	Adarb1	0.3126	0.32253
Rsad1:chr11:94540474	Adarb1	-0.312283	0.323048
Ppp1cb:chr5:32493610	Adarb1	0.312084	0.323372
Taok1:chr11:77536456	Adarb1	-0.312084	0.323372
Cnot2:chr10:116485676	Adarb1	0.312084	0.323372
Fn3krp:chr11:121429844	Adarb1	-0.312084	0.323372
Ptpn11:chr5:121133521	Adarb1	-0.312084	0.323372
Nrgn:chr9:37545484	Adarb1	0.312084	0.323372
Taok2:chr7:126870917	Adarb1	-0.312084	0.323372
Gm20537:chr9:88453462	Adarb1	0.312084	0.323372
Efr3a:chr15:65873340	Adarb1	-0.312034	0.323453
Mrpl45:chr11:97328664	Adarb1	0.312034	0.323453
Acp2:chr2:91214076	Adarb1	0.31192	0.323641
Tecpr2:chr12:110970855	Adarb1	0.31192	0.323641
Dffa:chr4:149118148	Adarb1	0.31192	0.323641
Luc7l2:chr6:38606529	Adarb1	-0.311799	0.323838
[truncated: 3,013 more rows]
