# Supplementary material for: Dynamic A-to-I RNA editing during acute neuroinflammation in sepsis-associated encephalopathy
Source: Front Neurosci. 2024 Aug 2;18:1435185. doi: 10.3389/fnins.2024.1435185 (PMC11328407; doi:10.3389/fnins.2024.1435185)
Supplement: Supplementary file 15 [file Table_9.XLSX]

## Sheet: Sheet1
Table S9. Expression difference in six RBPs during acute neuroinflammation.
Tissue/cell	RBP	P
CEC	Hnrnpa0	0.04195
CEC	Unk	0.001061
CEC	Rbm45	0.468593
CEC	Msi1	0.3175
CEC	Hnrnpa1	0.100885
CEC	Dazap1	0.00281956
Microglia	Hnrnpa1	0.0194023
Microglia	Msi1	0.3632
Microglia	Hnrnpa0	0.190191
Microglia	Rbm45	0.447751
Microglia	Unk	0.481077
Microglia	Dazap1	0.67532
cerebral-vasculature	Unk	2.73288e-08
cerebral-vasculature	Msi1	2.90068e-07
cerebral-vasculature	Dazap1	2.10228e-06
cerebral-vasculature	Rbm45	2.98112e-06
cerebral-vasculature	Hnrnpa0	0.000502801
cerebral-vasculature	Hnrnpa1	0.0486119
