# Supplementary material for: Dynamic A-to-I RNA editing during acute neuroinflammation in sepsis-associated encephalopathy
Source: Front Neurosci. 2024 Aug 2;18:1435185. doi: 10.3389/fnins.2024.1435185 (PMC11328407; doi:10.3389/fnins.2024.1435185)
Supplement: Supplementary file 16 [file Table_10.XLSX]

## Sheet: Sheet1
Table S10. Differential A-to-I RNA editing events with significant correlations between editing levels and LPS treatment time in cerebral vessels.
Differential RNA editing event	Spearman r	Spearman p
Islr:chr9:58158172	0.765207	0.00373005
Rhoa:chr9:108337339	0.6597	0.0195885
Sod2:chr17:13017188	0.765207	0.00373005
Pakap:chr4:57895139	0.583997	0.0461749
Dtx3l:chr16:35928048	0.765207	0.00373005
Rab6a:chr7:100639568	0.64775	0.0227518
Spock2:chr10:60133279	0.604567	0.0373094
Rpsa:chr9:120131419	-0.64775	0.0227518
Nol10:chr12:17429793	0.765207	0.00373005
Gnb4:chr3:32584090	0.798892	0.00182809
Dtx3l:chr16:35928036	0.765207	0.00373005
Tspan14:chr14:40907022	0.582975	0.0466508
Gls:chr1:52187395	0.670515	0.0170145
Dcun1d3:chr7:119856274	0.582975	0.0466508
Zfp655:chr5:145246018	0.765207	0.00373005
Rpa1:chr11:75301008	-0.740619	0.00586624
Ywhag:chr5:135909342	0.842075	0.000589697
Rhpn2:chr7:35391298	-0.798892	0.00182809
Nr3c1:chr18:39410975	0.615422	0.0331563
Sdc4:chr2:164424643	0.626411	0.0293002
Dynll1:chr5:115299242	0.811107	0.00136607
Dagla:chr19:10245733	-0.798892	0.00182809
Efhd2:chr4:141858998	0.645343	0.0234314
Iqgap1:chr7:80712040	0.735404	0.00641807
Septin2:chr1:93509108	0.604567	0.0373094
Cds2:chr2:132309873	-0.7773	0.00292729
Zmpste24:chr4:121060312	0.693677	0.0123471
Iqgap1:chr7:80712390	0.604567	0.0373094
Grik5:chr7:25010643	0.64775	0.0227518
Spock2:chr10:60133278	0.64775	0.0227518
Pcdh19:chrX:133583477	0.642294	0.0243133
Tmco6:chr18:36741291	0.717788	0.00857343
Chsy1:chr7:66173734	0.738827	0.00605174
Bpgm:chr6:34504850	0.712525	0.00931136
Itih5:chr2:10251430	0.692145	0.0126225
Irak2:chr6:113694869	0.642294	0.0243133
Afdn:chr17:13905197	0.645343	0.0234314
Cds2:chr2:132309884	-0.90685	4.71531e-05
Gch1:chr14:47155050	0.806679	0.00152174
Rel:chr11:23737221	0.842701	0.00057875
Fndc3a:chr14:72539217	0.746219	0.00531444
Kdm3b:chr18:34838142	0.650084	0.0221069
Slfn5:chr11:82963283	0.68133	0.0146978
Kpna4:chr3:69073109	0.770469	0.00336253
Socs7:chr11:97398013	0.746219	0.00531444
Ccn3:chr15:54753094	0.67166	0.0167572
Ywhag:chr5:135910350	0.642294	0.0243133
Tmem175:chr5:108634075	0.587095	0.0447531
Gfod1:chr13:43196380	0.637401	0.0257782
N4bp2l2:chr5:150638268	-0.818317	0.00113913
Slc35e2:chr4:155621903	-0.712525	0.00931136
Spag9:chr11:94123672	0.746219	0.00531444
Gnl3l:chrX:150983816	0.669342	0.017281
Gm29609:chr5:31173480	-0.746219	0.00531444
Ccnd2:chr6:127130223	0.59452	0.0414721
Meg3:chr12:109547961	-0.605627	0.0368884
Cds2:chr2:132309669	-0.7773	0.00292729
Mlh3:chr12:85234649	-0.848026	0.000491806
Trp53inp1:chr4:11171319	0.59091	0.0430453
Ecm2:chr13:49531533	-0.605627	0.0368884
Rpa1:chr11:75300643	-0.682528	0.0144563
Rab2a:chr4:8597225	0.716438	0.00875846
Rap2c:chrX:51004539	0.604432	0.0373632
Sgk1:chr10:21999132	0.863667	0.000293719
Shoc2:chr19:54032975	0.736308	0.0063197
Gm49394:chr7:142653273	-0.842075	0.000589697
Dynll1:chr5:115297616	-0.846205	0.000520316
Atp5b:chr10:128088081	0.829228	0.000852213
Mdc1:chr17:35858957	-0.811107	0.00136607
Calcrl:chr2:84331012	0.714329	0.00905336
Jade2:chr11:51814158	0.616441	0.032784
Erp29:chr5:121447549	0.679915	0.0149869
Mapk6:chr9:75387202	0.856604	0.000373438
Meg3:chr12:109547644	-0.59903	0.0395646
Rpa1:chr11:75300584	-0.863667	0.000293719
Akap8:chr17:32304589	0.582975	0.0466508
Slfn5:chr11:82963254	0.604567	0.0373094
Htra1:chr7:130985524	-0.7773	0.00292729
Ino80d:chr1:63049607	0.64775	0.0227518
Qpctl:chr7:19140326	0.587095	0.0447531
Cdk13:chr13:17804302	-0.640322	0.0248963
Caskin2:chr11:115799595	-0.695817	0.01197
Camkv:chr9:107949313	-0.674072	0.0162249
4930453N24Rik:chr16:64762650	0.648391	0.0225734
Rpl22:chr4:152332980	-0.693362	0.0124033
Hus1:chr11:8993959	0.623502	0.0302878
Mier1:chr4:103165402	0.7773	0.00292729
Esrra:chr19:6910986	0.717788	0.00857343
Acvrl1:chr15:101142072	0.607763	0.0360501
Tnfrsf1b:chr4:145213666	0.760583	0.0040775
Utrn:chr10:12744050	0.757907	0.00428944
Atl3:chr19:7535250	0.690934	0.0128434
Cp:chr3:19989064	-0.669342	0.017281
Trp53inp1:chr4:11171014	0.623502	0.0302878
Hjurp:chr1:88263988	0.669342	0.017281
Snhg11:chr2:158384122	0.820484	0.00107698
Gabpb2:chr3:95183940	-0.604567	0.0373094
Adsl:chr15:80968839	-0.692349	0.0125855
Nrep:chr18:33437483	-0.67166	0.0167572
Clu:chr14:65981396	-0.789478	0.00225921
Zfp626:chr7:27821531	-0.605627	0.0368884
Atxn7:chr14:14106277	0.652328	0.0214992
Sh2d5:chr4:138260127	-0.616441	0.032784
Rsrc2:chr5:123741252	-0.605627	0.0368884
Tob2:chr15:81849480	0.582453	0.0468954
Socs7:chr11:97397786	0.660578	0.0193696
Zbtb4:chr11:69783302	-0.712525	0.00931136
Smpd4:chr16:17637746	-0.67037	0.0170472
Ttc9c:chr19:8811101	0.59091	0.0430453
Prpf4:chr4:62423987	0.648886	0.0224363
Tubb6:chr18:67402417	0.770469	0.00336253
Dact3:chr7:16885788	0.583997	0.0461749
Rell1:chr5:63909788	0.59091	0.0430453
Zyg11b:chr4:108230936	-0.594812	0.0413469
Igfbp7:chr5:77407731	-0.64775	0.0227518
Lrrc8d:chr5:105797683	-0.597516	0.0401983
Ehd1:chr19:6299418	0.616441	0.032784
Kif3c:chr12:3404647	-0.587095	0.0447531
Psma3:chr12:70995210	0.702959	0.0107726
Rab2a:chr4:8597220	0.623502	0.0302878
Ncl:chr1:86345916	-0.670515	0.0170145
Etfbkmt:chr6:149150873	0.67166	0.0167572
N4bp2l2:chr5:150638267	-0.735404	0.00641807
Iqgap1:chr7:80712366	0.626159	0.0293851
Calcrl:chr2:84332405	0.67166	0.0167572
AW011738:chr4:156209798	-0.582975	0.0466508
Xpnpep3:chr15:81456903	0.704617	0.010508
Zyg11b:chr4:108230862	-0.605634	0.0368855
Cds2:chr2:132309872	-0.780267	0.00275225
Grik5:chr7:25010650	0.669342	0.017281
Cds2:chr2:132309634	-0.820484	0.00107698
Mfap1a:chr2:121493253	-0.800292	0.00176979
Rprd1a:chr18:24505993	-0.671588	0.0167734
Sdc3:chr4:130823469	0.761215	0.00402858
Nol10:chr12:17429884	0.616441	0.032784
Rpa1:chr11:75301040	-0.734117	0.00656002
5031425E22Rik:chr5:23425894	-0.648886	0.0224363
Dph3:chr14:32081680	0.588897	0.0439406
Eapp:chr12:54671908	-0.583997	0.0461749
Icam1:chr9:21020583	0.770469	0.00336253
St3gal1:chr15:67103550	0.669342	0.017281
Rpa1:chr11:75300985	-0.604567	0.0373094
Rab14:chr2:35181087	0.767848	0.00354199
Arhgdia:chr11:120579091	-0.755709	0.00446968
Rasgrp2:chr19:6415047	-0.747298	0.00521273
Hipk1:chr3:103740623	0.594812	0.0413469
Lats2:chr14:57691324	0.667985	0.0175929
B4galt1:chr4:40805006	-0.702959	0.0107726
Bbs1:chr19:4887700	0.770675	0.00334878
2900026A02Rik:chr5:113086758	-0.649272	0.0223297
Snapc1l:chr12:73946380	0.648886	0.0224363
Mlh3:chr12:85235104	-0.682528	0.0144563
Tra2a:chr6:49254769	-0.638071	0.025574
Isca1:chr13:59756213	0.690934	0.0128434
Abca3:chr17:24404123	-0.67166	0.0167572
Pla2g15:chr8:106163970	-0.582106	0.0470584
Ap1s1:chr5:137035510	-0.582106	0.0470584
Prpf38b:chr3:108903092	0.595161	0.0411972
Zfp626:chr7:27821627	-0.785196	0.00247916
Fas:chr19:34314283	0.770469	0.00336253
Bbs2:chr8:94080122	0.652328	0.0214992
Magt1:chrX:105970066	-0.594418	0.0415159
Agl:chr3:116744163	-0.582975	0.0466508
Plpp5:chr8:25723197	-0.587095	0.0447531
Slfn5:chr11:82963265	0.626159	0.0293851
Cox7b:chrX:106018981	-0.604494	0.0373383
Bok:chr1:93695368	-0.798892	0.00182809
Foxp1:chr6:99147618	0.656867	0.0203076
Taok1:chr11:77536456	0.595161	0.0411972
Wasf2:chr4:133196957	0.595161	0.0411972
Vcam1:chr3:116117788	0.868184	0.000250154
N4bp2l2:chr5:150638269	-0.660861	0.0192995
Thrap3:chr4:126169867	-0.864299	0.000287298
Gabpb2:chr3:95183561	-0.630584	0.0279246
Megf8:chr7:25365816	-0.613219	0.0339709
Ahsa2:chr11:23489325	-0.583203	0.0465444
Tbc1d24:chr17:24176459	-0.679915	0.0149869
Rpa1:chr11:75300977	-0.690934	0.0128434
Gm29650:chrY:1048726	-0.755709	0.00446968
St3gal1:chr15:67105663	0.595161	0.0411972
2410131K14Rik:chr5:118265902	-0.681273	0.0147093
Nkd1:chr8:88521380	-0.587723	0.0444689
Klf6:chr13:5868630	0.842075	0.000589697
Arsa:chr15:89472651	0.698238	0.0115535
Tra2a:chr6:49254877	-0.750555	0.00491468
Itih5:chr2:10252144	-0.582106	0.0470584
Sntb2:chr8:107017780	0.605627	0.0368884
Dnajc1:chr2:18214629	0.64775	0.0227518
Gas8:chr8:123535215	-0.724589	0.00768569
Arl13b:chr16:62794324	-0.656867	0.0203076
Pnisr:chr4:21873320	-0.610771	0.0348929
Usp31:chr7:121642679	0.650496	0.0219944
Ski:chr4:155156488	0.604567	0.0373094
Flnb:chr14:7937179	-0.811107	0.00136607
Zbtb7b:chr3:89379232	-0.746392	0.00529796
Cxcl12:chr6:117180521	-0.712525	0.00931136
E2f4:chr8:105303445	-0.672812	0.0165014
Vcam1:chr3:116118626	0.761215	0.00402858
Ctdsp1:chr1:74397102	0.600444	0.0389798
Eapp:chr12:54671703	0.60553	0.0369266
Tgoln1:chr6:72608983	0.64775	0.0227518
Raph1:chr1:60485787	0.746392	0.00529796
Haus2:chr2:120620314	-0.674161	0.0162056
Rasa2:chr9:96540093	0.582975	0.0466508
Hinfp:chr9:44292624	-0.653488	0.02119
Rrn3:chr16:13814003	-0.649569	0.0222481
Mrpl24:chr3:87921525	0.746219	0.00531444
Lactb2:chr1:13625722	-0.582975	0.0466508
Erp29:chr5:121447959	-0.766505	0.00363671
Gm29609:chr5:31173481	-0.601929	0.0383721
Apobec3:chr15:79907602	0.604494	0.0373383
Cdkn1b:chr6:134925137	-0.626006	0.0294363
Hip1:chr5:135408855	-0.62836	0.028652
Gas8:chr8:123535229	-0.587723	0.0444689
Tpp1:chr7:105745826	-0.698238	0.0115535
Zfp771:chr7:127254322	0.734117	0.00656002
Nt5dc3:chr10:86837257	-0.669342	0.017281
Eloc:chr1:16646834	-0.69282	0.0125005
Bcl2l13:chr6:120892464	-0.674161	0.0162056
Rab35:chr5:115646668	0.587095	0.0447531
Nsmce4a:chr7:130547259	-0.577852	0.0490887
Dleu2:chr14:61618400	-0.692349	0.0125855
Azin1:chr15:38490100	-0.604494	0.0373383
Acp2:chr2:91214076	-0.722315	0.00797446
Rasal2:chr1:157138062	-0.650084	0.0221069
Zmym5:chr14:56806656	-0.601929	0.0383721
Dlgap1:chr17:70142338	0.805993	0.00154702
Ncl:chr1:86345930	-0.606634	0.0364914
Cdc25b:chr2:131194158	-0.674161	0.0162056
Frmd5:chr2:121775673	0.732215	0.00677414
Celf2:chr2:6541614	-0.626006	0.0294363
Marchf5:chr19:37219531	-0.588139	0.0442812
Pkm:chr9:59676369	-0.757907	0.00428944
Sec24b:chr3:129985308	-0.593442	0.0419375
Pmpca:chr2:26396546	0.626159	0.0293851
Atcay:chr10:81205266	-0.577852	0.0490887
Gm37494:chr7:39569508	-0.668391	0.0174993
Kank3:chr17:33821048	-0.698238	0.0115535
Fam32a:chr8:72223528	-0.594418	0.0415159
AL928616.1:chr2:84590544	-0.783598	0.00256531
Tie1:chr4:118478072	-0.601929	0.0383721
Sfxn2:chr19:46596349	0.661783	0.0190722
Polr3f:chr2:144541820	-0.59091	0.0430453
Nek4:chr14:30988146	-0.618134	0.0321727
Plgrkt:chr19:29349225	-0.642294	0.0243133
5031425E22Rik:chr5:23424713	-0.642294	0.0243133
Dtx3l:chr16:35926845	0.669342	0.017281
Eng:chr2:32676936	-0.601929	0.0383721
Rnf4:chr5:34351582	0.770469	0.00336253
Mmgt1:chrX:56586581	-0.757907	0.00428944
Dusp3:chr11:101972684	-0.630584	0.0279246
Polr3f:chr2:144540474	-0.746912	0.00524894
Itga1:chr13:114959320	0.582749	0.0467568
Gabpb2:chr3:95183941	-0.626159	0.0293851
Trim25:chr11:89018041	0.626006	0.0294363
Gatc:chr5:115333800	-0.757907	0.00428944
Gm28035:chr2:30270888	-0.588139	0.0442812
Mboat7:chr7:3684435	-0.59091	0.0430453
Bms1:chr6:118396243	-0.765207	0.00373005
Nae1:chr8:104517065	-0.616602	0.0327256
Ccnd2:chr6:127128279	0.616602	0.0327256
Nrg1:chr8:32454549	-0.671695	0.0167496
Cdc14a:chr3:116272750	-0.667985	0.0175929
Smim14:chr5:65448046	-0.68133	0.0146978
Mrtfa:chr15:81012667	-0.80929	0.00142838
Nfat5:chr8:107371337	-0.732215	0.00677414
Zbtb4:chr11:69783297	-0.765207	0.00373005
Ppp1r15b:chr1:133137346	0.59091	0.0430453
Huwe1:chrX:151907066	-0.623502	0.0302878
Fhod1:chr8:105334986	-0.623502	0.0302878
Smad1:chr8:79356295	-0.595161	0.0411972
Norad:chr2:156390419	-0.765207	0.00373005
Rcc2:chr4:140702286	-0.623502	0.0302878
Ddx47:chr6:135017229	-0.595161	0.0411972
Ssu72:chr4:155715965	-0.595161	0.0411972
Ntan1:chr16:13833959	-0.642294	0.0243133
Mocs2:chr13:114819377	-0.623502	0.0302878
Smpd4:chr16:17637972	-0.623502	0.0302878
Kpnb1:chr11:97187648	-0.595161	0.0411972
Ppp2r3d:chr9:124423926	-0.595161	0.0411972
Mib1:chr18:10813704	-0.595161	0.0411972
Sertad1:chr7:27490230	0.604494	0.0373383
Tmem263:chr10:85115671	-0.595161	0.0411972
AL928616.1:chr2:84587705	-0.595161	0.0411972
Poglut1:chr16:38526099	-0.623502	0.0302878
Mier1:chr4:103164732	-0.649272	0.0223297
Gm28035:chr2:30270725	-0.732215	0.00677414
Tbc1d24:chr17:24176519	-0.583511	0.0464009
Mfap1a:chr2:121493232	-0.59903	0.0395646
Icam1:chr9:21020548	0.67037	0.0170472
Crem:chr18:3266841	0.626883	0.0291423
Slf2:chr19:44981508	0.583997	0.0461749
Gnl3l:chrX:150983815	0.582975	0.0466508
Stxbp2:chr8:3643285	-0.633819	0.0268906
Tmem252:chr19:24678602	0.691439	0.012751
Dtx3l:chr16:35928019	0.601929	0.0383721
Mapk1ip1l:chr14:47319979	0.582975	0.0466508
Ube3a:chr7:59281112	0.814713	0.0012486
Mrpl45:chr11:97328637	0.622295	0.0307046
Rpl7l1:chr17:46775235	0.601929	0.0383721
Dtx3l:chr16:35928849	0.576199	0.0498941
Ifitm2:chr7:140955191	0.594418	0.0415159
Irgm1:chr11:48867835	0.576199	0.0498941
