# Supplementary material for: Dynamic A-to-I RNA editing during acute neuroinflammation in sepsis-associated encephalopathy
Source: Front Neurosci. 2024 Aug 2;18:1435185. doi: 10.3389/fnins.2024.1435185 (PMC11328407; doi:10.3389/fnins.2024.1435185)
Supplement: Supplementary file 17 [file Table_11.XLSX]

## Sheet: Sheet2
Table S11. Differential A-to-I RNA editing events with significant correlations between editing levels and LPS treatment time in CECs.
Differential RNA editing event	Spearman r	Spearman p
Map4k2:chr19:6354608	0.930069	1.17026e-05
Hip1:chr5:135408861	0.928442	1.30926e-05
Tmem252:chr19:24679154	0.80929	0.00142838
Ablim1:chr19:57033582	0.820484	0.00107698
Zcchc17:chr4:130359931	0.80929	0.00142838
Tpd52l2:chr2:181515407	-0.713774	0.00913212
Acvrl1:chr15:101144156	0.789478	0.00225921
Gch1:chr14:47155050	0.950034	2.25486e-06
Arid5b:chr10:68092692	0.765207	0.00373005
Igtp:chr11:58207012	0.849534	0.00046914
AW112010:chr19:11050423	0.64775	0.0227518
Laptm4a:chr12:8922062	-0.913259	3.33828e-05
Vamp3:chr4:151048091	0.90685	4.71531e-05
Spns2:chr11:72452095	0.587095	0.0447531
Agfg1:chr1:82900092	0.717788	0.00857343
Norad:chr2:156390419	-0.865181	0.000278509
Slc44a1:chr4:53565471	-0.820484	0.00107698
Nras:chr3:103066090	-0.582975	0.0466508
Ubb-ps:chr14:46084028	-0.866778	0.000263135
Dtx3l:chr16:35926907	0.765207	0.00373005
Sik1:chr17:31847095	-0.829727	0.000840591
Ablim1:chr19:57118999	-0.626159	0.0293851
Rnf4:chr5:34352792	0.724589	0.00768569
Amotl2:chr9:102731873	0.811107	0.00136607
Jcad:chr18:4681250	0.690934	0.0128434
Sbno2:chr10:80075373	0.765207	0.00373005
Bag5:chr12:111713082	-0.846205	0.000520316
Lmna:chr3:88481874	0.798892	0.00182809
Ndufa7:chr17:33824618	-0.811107	0.00136607
Cap1:chr4:122859880	-0.734117	0.00656002
Eif4g2:chr7:111073878	0.712525	0.00931136
Bnip3l:chr14:67008826	0.798892	0.00182809
Snrpd3:chr10:75518043	-0.626411	0.0293002
Tead2:chr7:45233473	0.790866	0.00219117
Pcmtd1:chr1:7170234	0.7773	0.00292729
Apold1:chr6:134984264	0.778663	0.00284587
Qk:chr17:10213732	0.652328	0.0214992
Ube2d2a:chr18:35801360	0.582975	0.0466508
Itm2a:chrX:107397642	0.798892	0.00182809
Mfap1a:chr2:121492795	-0.804538	0.0016017
Ifnar1:chr16:91490702	0.669342	0.017281
Il4ra:chr7:125552267	0.686162	0.0137417
Rhoa:chr9:108337339	0.648886	0.0224363
Smad3:chr9:63647387	0.716438	0.00875846
Smad5:chr13:56740213	0.722315	0.00797446
Acox1:chr11:116173271	-0.670515	0.0170145
Resf1:chr6:149335258	0.746219	0.00531444
Slc44a1:chr4:53565533	-0.582975	0.0466508
Ppp1r15b:chr1:133137583	-0.626159	0.0293851
Flt4:chr11:49630310	0.757907	0.00428944
Ensa:chr3:95629117	0.693362	0.0124033
Psma3:chr12:70994636	0.68133	0.0146978
Hipk1:chr3:103740623	-0.755709	0.00446968
Arih1:chr9:59392371	-0.783598	0.00256531
Lrrc58:chr16:37868862	0.667985	0.0175929
Cttnbp2nl:chr3:105003548	0.90844	4.33838e-05
Kif5b:chr18:6201433	0.578064	0.0489859
Dusp3:chr11:101972529	0.669342	0.017281
Mfap1a:chr2:121492797	-0.829727	0.000840591
Gm4828:chr17:4881112	-0.735404	0.00641807
Rbbp4:chr4:129309892	-0.767848	0.00354199
Spns2:chr11:72474749	0.734117	0.00656002
Furin:chr7:80390142	0.7773	0.00292729
Fubp3:chr2:31615894	0.615422	0.0331563
Rps27l:chr9:66946125	0.626159	0.0293851
Zfp655:chr5:145246018	-0.68136	0.0146918
Gnb4:chr3:32584090	-0.594812	0.0413469
Gclm:chr3:122262763	0.714329	0.00905336
Pxmp4:chr2:154586335	0.767848	0.00354199
Sec22b:chr3:97901239	-0.761215	0.00402858
Mknk2:chr10:80671983	0.623502	0.0302878
Gm29502:chr13:100946422	0.620813	0.0312217
Slc40a1:chr1:45909113	0.64775	0.0227518
Pigq:chr17:25937018	-0.652328	0.0214992
Tlnrd1:chr7:83881619	0.623502	0.0302878
Pear1:chr3:87751290	-0.65938	0.0196688
B4galt5:chr2:167300021	0.783598	0.00256531
Cox20:chr1:178319155	-0.692145	0.0126225
Heg1:chr16:33722395	-0.765207	0.00373005
Proser2:chr2:6130099	0.623502	0.0302878
Rps6ka3:chrX:159366734	0.604494	0.0373383
Vasp:chr7:19257206	0.734117	0.00656002
Phc2:chr4:128752175	0.690934	0.0128434
Golt1b:chr6:142401922	0.599247	0.0394747
Furin:chr7:80389736	-0.737535	0.0061881
Bag3:chr7:128546564	-0.698238	0.0115535
Eif4g2:chr7:111072543	0.755709	0.00446968
Iqgap1:chr7:80712390	0.712525	0.00931136
Slc35e1:chr8:72482674	0.755709	0.00446968
Itprid2:chr2:79672180	-0.716438	0.00875846
Impdh1:chr6:29216280	-0.674161	0.0162056
Tpd52l2:chr2:181515406	-0.582975	0.0466508
Dgkz:chr2:91937474	-0.765207	0.00373005
Ptges:chr2:30891685	0.732215	0.00677414
Taf2:chr15:55054307	0.623502	0.0302878
Pan3:chr5:147546917	0.623502	0.0302878
Ro60:chr1:143755756	-0.669342	0.017281
Zfand3:chr17:30192717	0.623502	0.0302878
Wwtr1:chr3:57462583	0.712525	0.00931136
Slc44a1:chr4:53565519	-0.605627	0.0368884
Prxl2c:chr13:64290281	-0.746392	0.00529796
Wipi2:chr5:142669292	-0.690934	0.0128434
Gng7:chr10:80949087	-0.649272	0.0223297
Ppp1r15b:chr1:133137570	0.734117	0.00656002
Zc3h4:chr7:16436250	0.623502	0.0302878
Maged1:chrX:94541991	0.594812	0.0413469
Mdh2:chr5:135778632	-0.639193	0.0252344
Rbbp4:chr4:129309997	0.582975	0.0466508
Rtp4:chr16:23609942	0.692145	0.0126225
Echs1:chr7:140105804	0.582975	0.0466508
Tmpo:chr10:91164130	0.712525	0.00931136
Rpl7l1:chr17:46782645	-0.736308	0.0063197
Mall:chr2:127729893	0.649272	0.0223297
Dnajc18:chr18:35672734	-0.765207	0.00373005
Arhgap31:chr16:38599821	0.627256	0.0290178
Megf6:chr4:154267217	0.623502	0.0302878
Rab14:chr2:35180730	0.64775	0.0227518
Wdr43:chr17:71658304	0.623502	0.0302878
Rab6b:chr9:103182126	-0.694049	0.0122809
Mxd4:chr5:34176774	-0.582975	0.0466508
Ppp2r5b:chr19:6233874	0.623502	0.0302878
Ifnar1:chr16:91485302	-0.583997	0.0461749
Cdc42se2:chr11:54718344	0.712525	0.00931136
Slc6a6:chr6:91758153	0.712525	0.00931136
Hnrnpf:chr6:117925354	0.600099	0.0391219
Cd164:chr10:41530913	0.714487	0.00903102
Vat1:chr11:101459035	-0.765207	0.00373005
Rbbp4:chr4:129309920	0.626159	0.0293851
Spred1:chr2:117177320	0.623502	0.0302878
Atp5j2:chr5:145191531	0.616441	0.032784
Tob2:chr15:81850018	0.601929	0.0383721
Spag9:chr11:94123712	-0.583997	0.0461749
Commd7:chr2:153618387	0.577852	0.0490887
Arid5b:chr10:68136753	0.601929	0.0383721
Slc44a1:chr4:53567211	-0.865181	0.000278509
Ube2l6:chr2:84809669	-0.583997	0.0461749
Rpa1:chr11:75301093	-0.684142	0.0141357
Stx11:chr10:12940710	0.757907	0.00428944
Itpripl2:chr7:118485252	0.6597	0.0195885
Eml2:chr7:19202527	0.595161	0.0411972
Lrrc32:chr7:98501026	0.605627	0.0368884
Crtc2:chr3:90263988	0.595161	0.0411972
Psma3:chr12:70974698	-0.626883	0.0291423
Itpkb:chr1:180424210	-0.583997	0.0461749
Dld:chr12:31331765	0.626006	0.0294363
Ptprb:chr10:116372953	0.64775	0.0227518
Zfp593:chr4:134243461	0.595161	0.0411972
Shoc2:chr19:54032971	-0.757907	0.00428944
Mrpl36:chr13:73331028	0.59452	0.0414721
Slc35e1:chr8:72481405	-0.648886	0.0224363
Paqr5:chr9:61954325	0.599247	0.0394747
Tpm4:chr8:72152641	0.64775	0.0227518
Gne:chr4:44055333	-0.667985	0.0175929
Kmt2d:chr15:98865814	0.616602	0.0327256
Smad5:chr13:56739811	-0.642294	0.0243133
Sys1:chr2:164464773	0.626006	0.0294363
Rhpn2:chr7:35391300	-0.694049	0.0122809
Gpd1l:chr9:114904890	-0.765207	0.00373005
Ing4:chr6:125048576	-0.626006	0.0294363
Gpr89:chr3:96871332	-0.765207	0.00373005
Mturn:chr6:54700318	0.595161	0.0411972
Pcif1:chr2:164879372	0.583997	0.0461749
Lrp8:chr4:107872503	0.64775	0.0227518
Daglb:chr5:143481715	0.595161	0.0411972
Trappc5:chr8:3679970	0.582975	0.0466508
Isoc1:chr18:58678262	-0.765207	0.00373005
Ncoa7:chr10:30645762	0.732215	0.00677414
Ppp1r15b:chr1:133137561	-0.669342	0.017281
Ro60:chr1:143755801	0.650027	0.0221223
Cbx6:chr15:79826633	-0.757907	0.00428944
Prom1:chr5:44101710	0.604567	0.0373094
Cdc42:chr4:137320898	0.638071	0.025574
Gpx1:chr9:108339283	0.669342	0.017281
Slc44a1:chr4:53565515	-0.582975	0.0466508
Sh3gl1:chr17:56036493	-0.59452	0.0414721
Pmpca:chr2:26396546	0.746219	0.00531444
Mydgf:chr17:56176114	-0.672927	0.0164762
Azin1:chr15:38490101	-0.604494	0.0373383
Ubqln1:chr13:58177355	0.820484	0.00107698
Elovl1:chr4:118428132	-0.649272	0.0223297
Efr3a:chr15:65873649	-0.64775	0.0227518
Nes:chr3:87979958	0.615422	0.0331563
Afap1l1:chr18:61786661	-0.582975	0.0466508
Sptbn1:chr11:30240088	-0.610771	0.0348929
Slc44a1:chr4:53565531	0.582975	0.0466508
Cog3:chr14:75719720	0.64775	0.0227518
Grrp1:chr4:134251508	0.735404	0.00641807
Arl1:chr10:88731413	0.64775	0.0227518
Mfap1a:chr2:121493823	-0.692145	0.0126225
Slc35e1:chr8:72482214	0.692349	0.0125855
Cmtm6:chr9:114748634	-0.630584	0.0279246
Slc35e1:chr8:72481409	-0.669342	0.017281
Fos:chr12:85476402	0.670515	0.0170145
Gapvd1:chr2:34678098	-0.610771	0.0348929
Rabgap1:chr2:37565860	0.582106	0.0470584
Rbpms:chr8:33783842	-0.765207	0.00373005
Cd34:chr1:194938960	-0.638071	0.025574
Cyb561a3:chr19:10588638	0.648886	0.0224363
Ctsc:chr7:88309869	0.595161	0.0411972
Hsp25-ps1:chr13:45078569	-0.616602	0.0327256
Rapgef1:chr2:29739323	0.595161	0.0411972
Hipk1:chr3:103740840	-0.783598	0.00256531
Eif6:chr2:155826654	0.616602	0.0327256
Mafg:chr11:120625362	-0.623502	0.0302878
Pnkd:chr1:74349352	0.750555	0.00491468
Elob:chr17:23829128	0.649569	0.0222481
St3gal2:chr8:110972306	-0.623502	0.0302878
Ppp6r3:chr19:3455544	-0.625389	0.0296447
Atox1:chr11:55461170	-0.582453	0.0468954
Gbp2:chr3:142620690	0.626006	0.0294363
Fbxw11:chr11:32746635	0.595161	0.0411972
Prom1:chr5:43994491	0.670515	0.0170145
2900097C17Rik:chr2:156390259	-0.626006	0.0294363
Slc35a1:chr4:34663599	-0.604494	0.0373383
Degs1:chr1:182276630	-0.582453	0.0468954
Cnot6:chr11:49685283	-0.642294	0.0243133
Pja2:chr17:64282530	-0.738827	0.00605174
Prxl2c:chr13:64290161	0.604567	0.0373094
Mgat4b:chr11:50231219	0.6597	0.0195885
Tusc2:chr9:107563261	-0.68136	0.0146918
H2-T24:chr17:36006511	-0.605627	0.0368884
Slc27a4:chr2:29816100	-0.757907	0.00428944
Iqgap1:chr7:80712022	0.649272	0.0223297
Emc4:chr2:112367987	-0.595161	0.0411972
Slc19a3:chr1:83028019	0.604567	0.0373094
Selenoo:chr15:89099865	-0.693677	0.0123471
Qpctl:chr7:19140398	-0.587095	0.0447531
Cox15:chr19:43736433	-0.645343	0.0234314
Gnl3l:chrX:150985665	-0.623502	0.0302878
Pfkl:chr10:78009743	-0.601929	0.0383721
Tbc1d25:chrX:8172760	-0.650084	0.0221069
Ppp1r11:chr17:36948861	0.595161	0.0411972
Abcc4:chr14:118706191	-0.595161	0.0411972
Spag9:chr11:94123685	-0.695357	0.0120502
Smarca5:chr8:80709206	0.59091	0.0430453
Wfs1:chr5:36968614	0.642294	0.0243133
Tnfrsf1b:chr4:145213740	0.6597	0.0195885
Sp3:chr2:72938168	0.576199	0.0498941
Gnb4:chr3:32584088	-0.757907	0.00428944
Mfsd14a:chr3:116662614	-0.668391	0.0174993
Tex261:chr6:83775795	-0.576199	0.0498941
Dtx3l:chr16:35926845	0.626159	0.0293851
Ttpal:chr2:163615628	-0.595161	0.0411972
Kidins220:chr12:25005140	-0.765207	0.00373005
Tecr:chr8:83594427	-0.595161	0.0411972
Tbx1:chr16:18586705	-0.622295	0.0307046
Wdr7:chr18:63989084	-0.595161	0.0411972
Abtb1:chr6:88841858	-0.765207	0.00373005
4930402H24Rik:chr2:130712330	0.674072	0.0162249
Ift22:chr5:136913099	-0.60884	0.0356328
Mtch1:chr17:29347768	-0.648391	0.0225734
Dnajc18:chr18:35672499	-0.59091	0.0430453
Ecm2:chr13:49531533	0.64775	0.0227518
Tmem135:chr7:89338738	-0.605256	0.0370352
Zfyve27:chr19:42190549	-0.587723	0.0444689
Oip5os1:chr2:119601730	-0.582106	0.0470584
Atp13a2:chr4:141002082	-0.595161	0.0411972
Lmo7:chr14:101934034	-0.626006	0.0294363
Rnpepl1:chr1:92919081	-0.645343	0.0234314
Lin7c:chr2:109900568	0.595161	0.0411972
Cavin1:chr11:100957958	0.604567	0.0373094
Rab6a:chr7:100639568	0.626159	0.0293851
Dctn5:chr7:122148331	-0.626006	0.0294363
Trim34a:chr7:104261183	0.595161	0.0411972
Sgpl1:chr10:61099884	-0.674072	0.0162249
Slc44a1:chr4:53440585	0.595161	0.0411972
Mcur1:chr13:43538584	-0.582106	0.0470584
Slc39a3:chr10:81029285	-0.595161	0.0411972
Rnf6:chr5:146211568	-0.616602	0.0327256
Fam32a:chr8:72223835	-0.616602	0.0327256
Ccm2:chr11:6590764	-0.59091	0.0430453
Zbtb20:chr16:43637668	-0.595161	0.0411972
Tmem63b:chr17:45662949	0.652328	0.0214992
Smim14:chr5:65448045	-0.626006	0.0294363
Tecpr1:chr5:144195558	-0.576199	0.0498941
Tmem39b:chr4:129678666	-0.595161	0.0411972
Elmo1:chr13:20373593	-0.595161	0.0411972
Ywhah:chr5:33019007	-0.595858	0.0408997
Adgra2:chr8:27114417	-0.595161	0.0411972
Apobec3:chr15:79907541	0.604567	0.0373094
Pak2:chr16:32017315	0.616602	0.0327256
Gm49320:chr8:4247385	0.64775	0.0227518
Foxl2:chr9:98956335	-0.582453	0.0468954
Tmem106b:chr6:13085299	-0.607763	0.0360501
Cacfd1:chr2:27020323	-0.626006	0.0294363
Tmc7:chr7:118537597	0.59091	0.0430453
Ndufb7:chr8:83571624	-0.578064	0.0489859
Timp2:chr11:118303412	-0.628065	0.0287494
Sumf1:chr6:108140337	0.597516	0.0401983
Ranbp1:chr16:18248681	0.626159	0.0293851
Hnrnpu:chr1:178328738	-0.582106	0.0470584
Mfap1a:chr2:121492776	-0.725319	0.00759473
Agfg2:chr5:137651381	-0.577852	0.0490887
Rapgef3:chr15:97757225	-0.746219	0.00531444
Tjp1:chr7:65299756	-0.593442	0.0419375
Ctdsp2:chr10:126998654	-0.588139	0.0442812
Poldip2:chr11:78522473	-0.59091	0.0430453
Pcdhgc5:chr18:37840383	0.604567	0.0373094
Anapc5:chr5:122788378	-0.616441	0.032784
Slc27a1:chr8:71586648	-0.59091	0.0430453
Acbd3:chr1:180753504	-0.749059	0.00504997
Srsf10:chr4:135864698	0.637401	0.0257782
