# Supplementary material for: Dynamic A-to-I RNA editing during acute neuroinflammation in sepsis-associated encephalopathy
Source: Front Neurosci. 2024 Aug 2;18:1435185. doi: 10.3389/fnins.2024.1435185 (PMC11328407; doi:10.3389/fnins.2024.1435185)
Supplement: Supplementary file 18 [file Table_12.XLSX]

## Sheet: Sheet2
Table S12. Differential A-to-I RNA editing events with significant correlations between editing levels and LPS treatment time in microglia.
Differential RNA editing event	Spearman r	Spearman p
Dffa:chr4:149118174	0.951699	1.90873e-06
Mgat4a:chr1:37443269	0.885259	0.000128806
Mgat4a:chr1:37439589	0.897625	7.44109e-05
H2-K2:chr17:33975546	0.765207	0.00373005
Ppp2r1b:chr9:50881060	0.80929	0.00142838
Plagl2:chr2:153229494	0.811301	0.00135955
Slc39a14:chr14:70305972	0.765207	0.00373005
Sbno2:chr10:80075373	0.765207	0.00373005
Trim36:chr18:46198631	0.765207	0.00373005
Tagap1:chr17:6956737	0.761049	0.00404136
Mgat4a:chr1:37443161	0.7773	0.00292729
Siglech:chr7:55772857	-0.90279	5.79569e-05
Pcca:chr14:122737958	0.765207	0.00373005
Gcnt2:chr13:40917637	0.765207	0.00373005
Pcmtd1:chr1:7172369	0.76105	0.00404132
Fam160b1:chr19:57387692	0.648886	0.0224363
Slc35e1:chr8:72481405	-0.7773	0.00292729
Zfp324:chr7:12972233	0.746392	0.00529796
Plekhb2:chr1:34850003	0.750555	0.00491468
Snx10:chr6:51590466	0.715914	0.00883098
Bahd1:chr2:118917083	0.702963	0.010772
Arhgap39:chr15:76801220	-0.829727	0.000840591
Kcnk6:chr7:29222818	0.820484	0.00107698
I830077J02Rik:chr3:105930769	0.820409	0.00107907
Nckap1l:chr15:103497889	0.604567	0.0373094
Magt1:chrX:105970066	0.669342	0.017281
4933434E20Rik:chr3:90060713	0.690934	0.0128434
Tspyl1:chr10:34283747	0.778663	0.00284587
Nsfl1c:chr2:151494291	-0.804538	0.0016017
Gnl3l:chrX:150985741	0.735404	0.00641807
Tecr:chr8:83594466	-0.729728	0.00706196
Lmo2:chr2:103973844	0.645343	0.0234314
Ppp1r15b:chr1:133132631	0.841251	0.000604373
Gltp:chr5:114690962	0.713774	0.00913212
Smug1:chr15:103154784	0.589188	0.0438103
Gna11:chr10:81529923	0.755709	0.00446968
Paox:chr7:140135783	0.639193	0.0252344
Zfhx3:chr8:108960348	0.690934	0.0128434
Cyb561a3:chr19:10588638	0.690934	0.0128434
Golt1b:chr6:142403419	0.702963	0.010772
Lman2:chr13:55362611	-0.828381	0.000872234
Caprin1:chr2:103765252	-0.739305	0.0060018
Blcap:chr2:157558140	-0.783631	0.00256355
Chd9:chr8:90885954	-0.782794	0.00260955
Dnajc18:chr18:35672493	0.616441	0.032784
Pebp1:chr5:117287589	-0.820484	0.00107698
Stard3:chr11:98358440	-0.798892	0.00182809
Slc43a2:chr11:75574828	0.794547	0.00201842
Cybc1:chr11:121229280	0.64775	0.0227518
Dhx30:chr9:110086953	0.698238	0.0115535
Cds2:chr2:132309863	0.7773	0.00292729
Tgfbr1:chr4:47353264	-0.682528	0.0144563
Ado:chr10:67546542	0.669342	0.017281
Cds2:chr2:132309633	0.64775	0.0227518
Trim25:chr11:89000858	0.693677	0.0123471
Pank3:chr11:35786862	-0.716438	0.00875846
Lrrc3:chr10:77900160	0.64775	0.0227518
Eif2ak3:chr6:70904502	0.642294	0.0243133
Pank3:chr11:35789325	0.674072	0.0162249
Stat6:chr10:127643000	0.606692	0.0364687
Mob1a:chr6:83340508	0.582975	0.0466508
Lactb2:chr1:13625006	0.712525	0.00931136
Rpa1:chr11:75301010	-0.690934	0.0128434
Selenop:chr15:3280063	0.626159	0.0293851
Slc39a3:chr10:81029246	-0.737535	0.0061881
Klhdc10:chr6:30452593	0.6597	0.0195885
Abraxas2:chr7:132859251	0.767848	0.00354199
Haus2:chr2:120620614	-0.794547	0.00201842
Ubap2l:chr3:90042935	0.667985	0.0175929
Vamp4:chr1:162598198	-0.761215	0.00402858
Rpa1:chr11:75300639	0.642294	0.0243133
Zfp397:chr18:23960379	-0.818624	0.00113017
Sort1:chr3:108359104	-0.734117	0.00656002
Pank3:chr11:35786847	0.59452	0.0414721
Gm2a:chr11:55110583	0.767848	0.00354199
Sf3a1:chr11:4181009	0.650084	0.0221069
Prkcb:chr7:122628374	0.667985	0.0175929
Mrpl24:chr3:87921687	-0.582453	0.0468954
Insr:chr8:3179422	0.736308	0.0063197
Bach1:chr16:87698971	0.732215	0.00677414
Slc35e1:chr8:72481409	-0.712525	0.00931136
Slc35b4:chr6:34158157	0.712525	0.00931136
2310033P09Rik:chr11:59208366	0.587095	0.0447531
Rcc2:chr4:140722921	-0.682528	0.0144563
Ift52:chr2:163045427	0.693677	0.0123471
Il6st:chr13:112505109	0.582975	0.0466508
B3gat3:chr19:8925716	0.746219	0.00531444
Slc16a3:chr11:120958655	0.638071	0.025574
Spred1:chr2:117179985	0.714329	0.00905336
Rpl22:chr4:152332980	0.716438	0.00875846
Ube4a:chr9:44933428	0.623502	0.0302878
Dnase2a:chr8:84911344	0.627256	0.0290178
Tmem33:chr5:67287306	0.670515	0.0170145
Rps17:chr7:81345216	0.732215	0.00677414
Sdf4:chr4:156010679	-0.706573	0.0102019
Dip2b:chr15:100173320	0.783631	0.00256355
Ywhaq:chr12:21417542	-0.606692	0.0364687
Dedd:chr1:171341984	0.623502	0.0302878
Numb:chr12:83819615	0.582975	0.0466508
Rab35:chr5:115646668	-0.693362	0.0124033
Ykt6:chr11:5967429	0.626159	0.0293851
Ly86:chr13:37345331	-0.702963	0.010772
Anapc11:chr11:120599579	0.714487	0.00903102
Mlxipl:chr5:135138361	0.649272	0.0223297
Gm37494:chr7:39569508	-0.738827	0.00605174
Gpd1l:chr9:114901381	-0.802246	0.00169083
Zfyve27:chr19:42190549	-0.668391	0.0174993
Engase:chr11:118488785	-0.671588	0.0167734
Kcnk6:chr7:29222796	-0.68133	0.0146978
Mmgt1:chrX:56587638	0.667985	0.0175929
Dcakd:chr11:103000167	0.623502	0.0302878
Chd9:chr8:90885786	-0.668391	0.0174993
Wipi2:chr5:142669249	0.627256	0.0290178
Rbm5:chr9:107770971	-0.784215	0.00253181
Ptges3:chr10:128076261	0.623502	0.0302878
Klhdc10:chr6:30451772	-0.715626	0.00887105
Pskh1:chr8:105930149	0.669342	0.017281
Cox6b1:chr7:30626127	0.694049	0.0122809
Acd:chr8:105700529	0.626159	0.0293851
Dock4:chr12:40844714	0.623502	0.0302878
Ssu72:chr4:155716480	-0.583511	0.0464009
Dnase2a:chr8:84911329	0.59903	0.0395646
Fuca2:chr10:13501058	-0.6597	0.0195885
Heatr3:chr8:88171155	-0.630584	0.0279246
Arhgap5:chr12:52569284	0.652328	0.0214992
Tuba1a:chr15:98950040	-0.627256	0.0290178
Zbtb8os:chr4:129341559	0.623502	0.0302878
Npl:chr1:153549714	0.648886	0.0224363
Fbxl17:chr17:63356838	0.623502	0.0302878
Rbbp4:chr4:129309997	0.724589	0.00768569
Rbbp4:chr4:129310001	0.690934	0.0128434
Tfe3:chrX:7774404	0.64775	0.0227518
Zyg11b:chr4:108230940	0.623502	0.0302878
Ldah:chr12:8284672	-0.630584	0.0279246
Cd300a:chr11:114902774	-0.683733	0.0142164
Stard8:chrX:99074502	0.623502	0.0302878
Gm21985:chr2:112286336	-0.757907	0.00428944
Galnt1:chr18:24205967	-0.60884	0.0356328
Tppp:chr13:74033563	-0.668391	0.0174993
Cdip1:chr16:4767982	0.623502	0.0302878
Natd1:chr11:60903604	0.679915	0.0149869
Fam20b:chr1:156680688	0.595161	0.0411972
Rbbp4:chr4:129309984	0.690934	0.0128434
Phf5a:chr15:81865772	0.656867	0.0203076
Serpine2:chr1:79794495	0.7773	0.00292729
Zmym2:chr14:56919331	0.623502	0.0302878
Pea15a:chr1:172197620	-0.626159	0.0293851
C5ar2:chr7:16236438	-0.626159	0.0293851
Ovca2:chr11:75176318	-0.765207	0.00373005
Rabl6:chr2:25606247	-0.68136	0.0146918
Ubqln4:chr3:88569341	0.646632	0.0230656
Slc35e1:chr8:72482675	-0.691439	0.012751
Syf2:chr4:134930976	-0.638071	0.025574
Rlim:chrX:103960550	0.676475	0.0157069
Tesk1:chr4:43446873	-0.674072	0.0162249
Chd9:chr8:90876617	0.670515	0.0170145
Lrrc3:chr10:77897686	0.604567	0.0373094
Rab27a:chr9:73097228	0.712525	0.00931136
Psma3:chr12:70994629	-0.64775	0.0227518
Dusp3:chr11:101972534	0.591177	0.0429275
Slc35e1:chr8:72482554	-0.648391	0.0225734
Cuedc2:chr19:46335885	-0.65938	0.0196688
Isg20l2:chr3:87939306	0.595161	0.0411972
Cab39l:chr14:59547591	0.642294	0.0243133
Otulinl:chr15:27681542	0.604567	0.0373094
Rbbp4:chr4:129309920	0.734117	0.00656002
Lactb2:chr1:13625787	0.601929	0.0383721
Tlk2:chr11:105275919	0.611175	0.0347393
Stimate:chr14:30876356	-0.652328	0.0214992
Isg20l2:chr3:87940376	-0.626159	0.0293851
Wrap73:chr4:154146525	-0.667985	0.0175929
Btg1:chr10:96618851	0.734117	0.00656002
Mob3a:chr10:80685976	-0.604567	0.0373094
Ski:chr4:155154860	0.638071	0.025574
Mfap1a:chr2:121493823	-0.732215	0.00677414
Jmjd4:chr11:59456514	-0.704367	0.0105475
Wipi2:chr5:142668068	-0.738827	0.00605174
P2rx4:chr5:122714518	-0.642294	0.0243133
Ilvbl:chr10:78584414	0.623502	0.0302878
Ggps1:chr13:14052057	0.64775	0.0227518
Ly86:chr13:37377889	0.739305	0.0060018
Rab8b:chr9:66844523	-0.679915	0.0149869
Med16:chr10:79899054	0.595161	0.0411972
Zfp276:chr8:123257237	0.650753	0.0219244
Zfp429:chr13:67389971	0.595161	0.0411972
Tmc7:chr7:118537597	0.595161	0.0411972
Rhobtb1:chr10:69290309	0.615307	0.0331984
Mvb12b:chr2:33730068	0.642294	0.0243133
Lgi4:chr7:31069301	-0.642294	0.0243133
Msl2:chr9:101102513	-0.649272	0.0223297
Eif3l:chr15:79075214	-0.594812	0.0413469
Xpnpep3:chr15:81454010	-0.642294	0.0243133
Ttc9c:chr19:8810526	-0.582106	0.0470584
Hat1:chr2:71409000	0.595161	0.0411972
Gosr2:chr11:103697688	-0.64775	0.0227518
Gm37988:chr1:4857828	-0.642294	0.0243133
Rnpep:chr1:135284053	0.653488	0.02119
Dtx3l:chr16:35928002	0.595161	0.0411972
Tlnrd1:chr7:83881867	0.595161	0.0411972
Rnf5:chr17:34601617	0.626159	0.0293851
Selenot:chr3:58590700	-0.604567	0.0373094
Pofut1:chr2:153266572	-0.577852	0.0490887
Zfp324:chr7:12972187	0.68133	0.0146978
Armh3:chr19:45854231	-0.626883	0.0291423
Lamp2:chrX:38420503	0.582975	0.0466508
Fkbp8:chr8:70531907	0.611175	0.0347393
Vta1:chr10:14655563	0.782794	0.00260955
Cds2:chr2:132309880	0.604567	0.0373094
Mrpl24:chr3:87921682	-0.65938	0.0196688
Rapgef5:chr12:117759222	0.604432	0.0373632
Jam3:chr9:27097495	0.601929	0.0383721
Slc7a7:chr14:54369509	0.59903	0.0395646
Dazap2:chr15:100615654	-0.674072	0.0162249
Malt1:chr18:65476402	0.595161	0.0411972
Magt1:chrX:105971286	0.652328	0.0214992
Tent5c:chr3:100468785	0.668391	0.0174993
Traf7:chr17:24509074	-0.623502	0.0302878
Ube2l6:chr2:84809669	0.595161	0.0411972
Cad:chr5:31068151	-0.623502	0.0302878
Csnk1a1:chr18:61588396	0.724589	0.00768569
Fbxo4:chr15:3971383	-0.623502	0.0302878
Eif4e2:chr1:87226122	-0.626006	0.0294363
Rbbp4:chr4:129309971	0.690934	0.0128434
4931406P16Rik:chr7:34284964	0.595161	0.0411972
Tmem33:chr5:67287525	0.595161	0.0411972
Hint1:chr11:54866470	0.576199	0.0498941
Extl3:chr14:65147214	-0.662027	0.0190121
Sfi1:chr11:3155937	-0.606692	0.0364687
Ptpn6:chr6:124733105	0.671695	0.0167496
Etv3:chr3:87537053	0.732215	0.00677414
Fkbp5:chr17:28422743	0.595161	0.0411972
Ccdc6:chr10:70192643	-0.595604	0.0410078
Bckdk:chr7:127904093	-0.623502	0.0302878
Pald1:chr10:61383339	-0.642294	0.0243133
Scarb2:chr5:92443119	0.611991	0.034431
Dnase2a:chr8:84911180	0.582975	0.0466508
Aarsd1:chr11:101417396	-0.616602	0.0327256
Rnf11:chr4:109454026	0.627256	0.0290178
Casp9:chr4:141814330	-0.577852	0.0490887
Kdm3b:chr18:34808568	-0.59091	0.0430453
Slc35a3:chr3:116675258	0.595161	0.0411972
Traf5:chr1:192066020	-0.623502	0.0302878
Arrb2:chr11:70432650	0.674161	0.0162056
Slc39a14:chr14:70304928	-0.623502	0.0302878
Ssbp4:chr8:70608300	0.587095	0.0447531
Bfar:chr16:13702581	-0.623502	0.0302878
Zfp24:chr18:24020769	-0.650084	0.0221069
Pld1:chr3:28095876	-0.616602	0.0327256
Bckdk:chr7:127904092	-0.623502	0.0302878
Wipi2:chr5:142669236	0.582975	0.0466508
Septin2:chr1:93486659	-0.757907	0.00428944
Dpy19l4:chr4:11319071	-0.623502	0.0302878
Rab43:chr6:87789254	-0.623502	0.0302878
St6gal1:chr16:23321641	-0.623502	0.0302878
Polr3f:chr2:144540504	-0.623502	0.0302878
Ado:chr10:67546407	0.627256	0.0290178
Txn1:chr4:57951864	-0.595161	0.0411972
Cds2:chr2:132309873	0.64775	0.0227518
Rcbtb2:chr14:73182921	-0.595161	0.0411972
Mapk1ip1l:chr14:47319973	0.669342	0.017281
Kremen1:chr11:5201808	-0.595161	0.0411972
Lrrc58:chr16:37881876	-0.595161	0.0411972
Atxn3:chr12:101921631	0.61993	0.0315328
Rad51d:chr11:82877888	-0.623502	0.0302878
Gm15590:chr17:6131902	-0.60553	0.0369266
Rassf2:chr2:131993472	-0.648886	0.0224363
Orai2:chr5:136170303	-0.595161	0.0411972
Bicd2:chr13:49385833	0.62836	0.028652
Dgkd:chr1:87856650	-0.601929	0.0383721
2900097C17Rik:chr2:156391001	-0.669342	0.017281
Psma3:chr12:70994662	-0.594812	0.0413469
Gnl3l:chrX:150985529	-0.626159	0.0293851
Rnf38:chr4:44127609	-0.623502	0.0302878
Cebpb:chr2:167689370	-0.669342	0.017281
Klhl36:chr8:119874460	-0.595161	0.0411972
Tgfbr1:chr4:47412402	0.582975	0.0466508
Pgd:chr4:149166649	-0.595161	0.0411972
Qpctl:chr7:19140327	0.604567	0.0373094
Sart1:chr19:5384931	-0.623502	0.0302878
Spire1:chr18:67506607	-0.595161	0.0411972
Rprd2:chr3:95760865	0.639193	0.0252344
Hmg20a:chr9:56418828	-0.623502	0.0302878
Tom1l2:chr11:60240092	-0.595161	0.0411972
Ptpa:chr2:30446738	0.626006	0.0294363
Lrrc3:chr10:77900353	0.626159	0.0293851
Rnf185:chr11:3417721	-0.595161	0.0411972
Adap2:chr11:80178015	-0.582975	0.0466508
Dtx3l:chr16:35927156	-0.616602	0.0327256
H2-Ob:chr17:34245677	-0.765207	0.00373005
Gys1:chr7:45455981	-0.616602	0.0327256
Ywhaz:chr15:36793603	-0.582975	0.0466508
Rab3gap2:chr1:185248035	-0.595161	0.0411972
Polr3f:chr2:144539921	-0.594812	0.0413469
Pex5:chr6:124397177	0.739305	0.0060018
Syk:chr13:52648461	0.604567	0.0373094
Man1a2:chr3:100566307	0.595161	0.0411972
Cog4:chr8:110861960	-0.595161	0.0411972
Dpy19l1:chr9:24502947	-0.623502	0.0302878
Chtf8:chr8:106884977	-0.59091	0.0430453
Hfe:chr13:23703553	-0.630584	0.0279246
Gtf3c3:chr1:54397765	-0.59091	0.0430453
Chd9:chr8:90828865	-0.588897	0.0439406
Secisbp2l:chr2:125740719	0.579501	0.0482947
Dtx3l:chr16:35928791	-0.616602	0.0327256
Mmachc:chr4:116703019	-0.595161	0.0411972
Lrrc3:chr10:77898430	-0.638071	0.025574
Nek7:chr1:138486433	-0.67166	0.0167572
Pmepa1:chr2:173224907	0.601929	0.0383721
Ptgr2:chr12:84314356	0.610771	0.0348929
M6pr:chr6:122317419	0.626159	0.0293851
Qpctl:chr7:19140364	0.605256	0.0370352
Bicd2:chr13:49385808	-0.579501	0.0482947
Rabl6:chr2:25606214	-0.649272	0.0223297
Dnase2a:chr8:84911348	0.604567	0.0373094
Man2a2:chr7:80350745	-0.626411	0.0293002
Slc45a4:chr15:73587594	-0.595161	0.0411972
Sec22a:chr16:35313792	-0.595161	0.0411972
Atox1:chr11:55461170	0.59091	0.0430453
Kif21b:chr1:136149437	-0.595161	0.0411972
Rin2:chr2:145822287	-0.653488	0.02119
Ralgapb:chr2:158496385	0.657997	0.0200185
Fitm2:chr2:163468444	0.735404	0.00641807
Spcs3:chr8:54529963	0.610771	0.0348929
Dcps:chr9:35124584	-0.704196	0.0105747
Sec62:chr3:30793328	-0.669342	0.017281
Bid:chr6:120916839	0.604432	0.0373632
Wasf2:chr4:133196096	-0.582975	0.0466508
5031439G07Rik:chr15:84949138	-0.604567	0.0373094
Tbc1d5:chr17:50735008	-0.582975	0.0466508
Atp6v1e1:chr6:120822718	0.59091	0.0430453
4933434E20Rik:chr3:90060394	-0.577852	0.0490887
Tnfrsf1b:chr4:145213567	0.690934	0.0128434
Ghdc:chr11:100769678	-0.601929	0.0383721
Sdc3:chr4:130823185	0.604567	0.0373094
Smarcc1:chr9:110238219	0.576199	0.0498941
Cyp20a1:chr1:60387531	0.583997	0.0461749
Trpc4ap:chr2:155657899	0.626159	0.0293851
Arid3b:chr9:57791240	0.582106	0.0470584
Rpa1:chr11:75300999	0.582975	0.0466508
Rxra:chr2:27761523	0.59091	0.0430453
